# Supplementary material for: Reovirus infection induces stabilization and up-regulation of cellular transcripts that encode regulators of TGF-β signaling
Source: PLoS One. 2018 Sep 27;13(9):e0204622. doi: 10.1371/journal.pone.0204622 (PMC6160134; doi:10.1371/journal.pone.0204622)
Supplement: S1 Table — (XLS) [file pone.0204622.s001.xls]

## Sheet: Sheet1
S1 Table. Expression intensity and half-lives of all transcripts in Mock, c87, c8, or Dearing infected cells
Abbreviations: P (Present), A (Absent), M (Mock), D (Dearing), LL (Lower limit), UL (Upper limit), FC (Fold change), GT (Greater than), LT (Less than), Med (Medium)
PROBE	DETECTION SUMMARY				INTENSITY												INTENSITY COMPARISONS																								HALF-LIFE
	M	c87	c8	D	Mock			Clone 87			Clone 8			Dearing			M vs c87				M vs c8	M vs c8			M vs D				c87 vs c8				c87 vs D				c8 vs D				Mock			Clone 87			Clone 8
PROBE_ID	Det_M	Det_C87	Det_C8	Det_D	Mean_M(0)	LL_M(0)	UL_M(0)	Mean_C87(0)	LL_C87(0)	UL_C87(0)	Mean_C8(0)	LL_C8(0)	UL_C8(0)	Mean_D(0)	LL_D(0)	UL_D(0)	FC_M/C87	FC_C87/M	pval_MvsC87	M<>C87	FC_M/C8	FC_C8/M	pval_MvsC8	M<>C8	FC_M/D	FC_D/M	pval_MvsD	M<>D	FC_C87/C8	FC_C8/C87	pval_C87vsC8	C87<>C8	FC_C87/D	FC_D/C87	pval_C87vsD	C87<>D	FC_C8/D	FC_D/C8	pval_C8vsD	C8<>D	M_LL	M_Med	M_UL	c87_LL	c87_Med	c87_UL	c8_LL	c8_Med	c8_UL
100004_at	P	P	P	P	928.4	841.746	1015.05	501.033	392.697	609.37	548.367	376.451	720.282	797.133	729.125	865.142	1.85297	0.539674	0.00045043	GT	1.69303	0.590658	0.00280158	GT	1.16467	0.85861	0.0888005	GT	0.913683	1.09447	0.696615	LT	0.628544	1.59098	0.0165971	LT	0.687923	1.45365	0.0659092	LT	1234	1237	1239	1126	1129	1132	6715	6735	6754
100005_at	P	P	P	P	1485.7	1033.35	1938.05	1544.17	1159.06	1929.27	1778.33	1220.97	2335.69	1742.77	1586.5	1899.03	0.962137	1.03935	0.738416	LT	0.835445	1.19697	0.465052	LT	0.852495	1.17303	0.422882	LT	0.868322	1.15165	0.578185	LT	0.886043	1.12861	0.375867	LT	1.02041	0.98	0.975227	GT	-506	-505	-503	1443	1450	1456	2600	2612	2624
100007_at	P	P	P	P	1502.55	1123.94	1881.16	1398	944.191	1851.81	1211	878.496	1543.5	1520.23	1388.4	1652.07	1.07479	0.930418	0.763989	GT	1.24075	0.805963	0.353416	GT	0.988368	1.01177	0.798353	LT	1.15442	0.866237	0.604996	GT	0.919596	1.08743	0.581436	LT	0.796588	1.25535	0.195697	LT	642	644	645	1821	1829	1837	-1208	-1203	-1197
100010_at	P	A	P	A	643.8	563.078	724.522	194.433	27.4963	361.37	426.367	300.517	552.216	202.3	48.5247	356.075	3.31116	0.302009	0.0146207	GT	1.50997	0.662266	0.0140368	GT	3.1824	0.314228	0.00846515	GT	0.456024	2.19287	0.199293	LT	0.961114	1.04046	0.865147	LT	2.1076	0.474474	0.174635	GT	213	214	216	354	358	362	191	193	195
100011_at	P	P	P	P	176.75	145.464	208.036	94.0333	26.2498	161.817	166.1	128.125	204.075	184.867	113.275	256.459	1.87965	0.532013	0.0658863	GT	1.06412	0.939745	0.757008	GT	0.956094	1.04592	0.885303	LT	0.566125	1.76639	0.232496	LT	0.508655	1.96597	0.208594	LT	0.898485	1.11298	0.740154	LT	312	314	315	-156	-155	-154	1679	1690	1700
100013_at	P	P	P	P	780.517	182.793	1378.24	8179.67	7801.67	8557.66	2790.47	2671.45	2909.49	5629.83	4696.13	6563.54	0.0954216	10.4798	0.00186668	LT	0.279708	3.57515	0.0227304	LT	0.138639	7.21296	0.00433951	LT	2.93129	0.341147	4.72e-06	GT	1.45291	0.688272	0.0120134	GT	0.495657	2.01752	0.00130284	LT	-156	-155	-154	-878	-870	-862	-147876	-146500	-145125
100014_at	P	P	P	P	346.35	209.282	483.418	462.5	184.634	740.366	640.267	437.935	842.598	565.5	445.561	685.439	0.748865	1.33535	0.493673	LT	0.540946	1.84861	0.106026	LT	0.612467	1.63274	0.148502	LT	0.722355	1.38436	0.357289	LT	0.81786	1.2227	0.459138	LT	1.13221	0.883226	0.642494	GT	448	450	453	328	330	333	222	223	225
100015_at	P	P	P	P	821.017	419.443	1222.59	649.1	288.317	1009.88	822.2	589.417	1054.98	1042.73	433.398	1652.07	1.26485	0.790605	0.825843	GT	0.998561	1.00144	0.699606	LT	0.78737	1.27005	0.558965	LT	0.789467	1.26668	0.446966	LT	0.622499	1.60643	0.423307	LT	0.788505	1.26822	0.751278	LT	-1702	-1691	-1679	317	320	323	-348	-345	-342
100016_at	P	P	P	P	424.883	306.896	542.87	190.633	149.535	231.731	579.233	402.86	755.607	328.133	253.974	402.293	2.2288	0.448672	0.0248603	GT	0.733527	1.36328	0.24815	LT	1.29485	0.77229	0.457564	GT	0.329113	3.03847	0.0059593	LT	0.580963	1.72128	0.0281926	LT	1.76524	0.566496	0.0527899	GT	427	429	430	-301	-299	-298	4611	4633	4655
100018_at	P	A	A	A	354.083	262.224	445.942	579.233	517.896	640.571	546.267	333.532	759.001	521.133	299.348	742.919	0.611297	1.63587	0.0318453	LT	0.648188	1.54276	0.124771	LT	0.679449	1.47178	0.186767	LT	1.06035	0.943086	0.682216	GT	1.11149	0.899695	0.565506	GT	1.04823	0.953991	0.875642	GT	190	191	191	1921	1933	1945	362	364	367
100020_at	P	P	P	P	2703.58	2238.62	3168.54	1984.77	1772.19	2197.34	2112.4	1424.98	2799.82	1786.17	1579.35	1992.99	1.36217	0.734124	0.0753376	GT	1.27986	0.781333	0.195286	GT	1.51362	0.660666	0.0253684	GT	0.939579	1.06431	0.864759	LT	1.11119	0.899938	0.260237	GT	1.18264	0.845563	0.502246	GT	-1005	-1003	-1000	8657	8688	8719	1207	1211	1216
100022_at	P	P	P	P	295.483	221.922	369.045	384.733	280.199	489.268	272.933	168.19	377.676	305	248.133	361.867	0.768021	1.30205	0.189694	LT	1.08262	0.923684	0.701455	GT	0.968798	1.03221	0.753695	LT	1.40962	0.709409	0.231723	GT	1.26142	0.792757	0.256514	GT	0.894863	1.11749	0.570665	LT	468	470	471	-5403	-5378	-5353	-363	-361	-360
100023_at	P	P	A	P	928.7	651.317	1206.08	1334.2	898.424	1769.98	1041.97	938.537	1145.4	1295.5	1156.52	1434.48	0.696073	1.43663	0.193652	LT	0.891295	1.12196	0.503094	LT	0.716866	1.39496	0.166992	LT	1.28046	0.780967	0.284888	GT	1.02987	0.970994	0.985874	GT	0.804297	1.24332	0.0408241	LT	-519	-518	-516	-11287	-11235	-11182	881	885	889
100024_at	P	P	P	P	670.183	518.803	821.564	1219.8	692.905	1746.7	1299.87	992.977	1606.76	555.833	436.273	675.393	0.549421	1.8201	0.0302188	LT	0.515579	1.93957	0.00793803	LT	1.20573	0.829375	0.380316	GT	0.938404	1.06564	0.725327	LT	2.19454	0.455676	0.0346373	GT	2.33859	0.427608	0.00728972	GT	188	189	190	1403	1410	1417	-1237	-1230	-1224
100026_at	P	P	P	P	5750.58	4742.35	6758.81	8932.6	7966.86	9898.34	6363.07	5173.84	7552.3	8115.83	7237.04	8994.63	0.643775	1.55334	0.00956144	LT	0.903744	1.10651	0.458368	LT	0.708564	1.41131	0.0272773	LT	1.40382	0.712342	0.0389373	GT	1.10064	0.908563	0.291435	GT	0.784031	1.27546	0.0961441	LT	-887	-885	-883	-740	-738	-736	634	636	638
100027_s_at	P	P	P	P	1497.77	1311.71	1683.82	2622.57	2150.78	3094.36	2264.37	1854.5	2674.24	1569.5	1192.64	1946.36	0.571107	1.75098	0.00139678	LT	0.661451	1.51183	0.00696363	LT	0.954295	1.04789	0.732315	LT	1.15819	0.863416	0.318766	GT	1.67096	0.59846	0.0248345	GT	1.44273	0.69313	0.0656882	GT	-2464	-2458	-2453	-386	-384	-383	759	761	764
100029_at	P	P	P	P	2643.78	2200.69	3086.88	5400.37	4411.54	6389.19	3724.57	2732.33	4716.8	2608.27	2287.96	2928.57	0.489556	2.04267	0.00126669	LT	0.709823	1.4088	0.0671142	LT	1.01362	0.986566	0.998084	GT	1.44993	0.689688	0.0970958	GT	2.07048	0.48298	0.00354007	GT	1.42799	0.700287	0.103207	GT	993	995	998	553	555	557	1552	1557	1562
100030_at	P	P	A	A	486.433	187.633	785.233	789.267	286.623	1291.91	152.567	52.1282	253.005	227.9	214.486	241.314	0.61631	1.62256	0.310179	LT	3.18833	0.313644	0.0729071	GT	2.13442	0.468512	0.269408	GT	5.17326	0.193302	0.0385285	GT	3.46321	0.288749	0.0542499	GT	0.669446	1.49377	0.208366	LT	-207	-206	-204	534	539	544	-167	-165	-164
100032_at	P	P	P	P	850.983	550.432	1151.53	939.9	425.926	1453.87	1371.47	1134.28	1608.66	1167.67	923.104	1412.23	0.905398	1.10449	0.818877	LT	0.620491	1.61163	0.108474	LT	0.72879	1.37214	0.235206	LT	0.685325	1.45916	0.258406	LT	0.804939	1.24233	0.441259	LT	1.17454	0.8514	0.296947	GT	251	252	253	2181	2194	2208	604	608	612
100033_at	P	P	P	P	1722.98	1287.54	2158.42	752.133	530.234	974.033	1121.83	784.267	1459.4	1482.77	1316.05	1649.48	2.2908	0.43653	0.00877652	GT	1.53586	0.651099	0.119671	GT	1.16201	0.860581	0.618839	GT	0.67045	1.49154	0.149019	LT	0.50725	1.97141	0.0103717	LT	0.756581	1.32174	0.164581	LT	-515	-513	-511	401	403	405	999	1004	1009
100037_at	P	P	P	P	1326.67	863.846	1789.49	2312.53	1465.36	3159.71	1622.23	1545.56	1698.91	2204.47	1526.4	2882.53	0.573685	1.74312	0.20457	LT	0.817803	1.22279	0.45378	LT	0.601808	1.66166	0.216072	LT	1.42552	0.701496	0.216923	GT	1.04902	0.953269	0.91211	GT	0.735885	1.35891	0.153542	LT	-350	-348	-347	-601	-597	-593	-2741	-2722	-2704
100039_at	P	P	P	P	1546.28	1210.15	1882.41	984.2	475.868	1492.53	1226.77	513.933	1939.6	1075	831.949	1318.05	1.57111	0.636494	0.0727036	GT	1.26045	0.793365	0.262875	GT	1.4384	0.695215	0.0730437	GT	0.802272	1.24646	0.625642	LT	0.915535	1.09226	0.65365	LT	1.14118	0.876287	0.850963	GT	-6423	-6401	-6378	1933	1943	1953	3642	3660	3679
100040_at	P	P	P	P	1912.7	1498.31	2327.09	2308.3	1504.52	3112.08	1993.23	1624.49	2361.98	2059.17	1447.5	2670.83	0.828618	1.20683	0.361585	LT	0.959597	1.0421	0.725204	LT	0.928871	1.07658	0.690295	LT	1.15807	0.863507	0.570435	GT	1.12099	0.892071	0.676033	GT	0.967981	1.03308	0.93396	LT	-6892	-6876	-6859	-934	-931	-928	528	530	531
100041_at	P	P	P	P	7230.55	5728.09	8733.01	6742.63	5007.24	8478.02	7791.47	6852.5	8730.44	6147.6	5749.81	6545.39	1.07236	0.93252	0.740065	GT	0.928009	1.07758	0.551097	LT	1.17616	0.850226	0.402421	GT	0.865387	1.15555	0.335858	LT	1.09679	0.911751	0.604075	GT	1.2674	0.789017	0.0268021	GT	-817	-815	-814	-954	-951	-948	1846	1852	1857
100042_at	P	P	P	P	1474.38	1179.37	1769.39	1069.97	811.585	1328.35	1725.43	1465.99	1984.88	1330	1163.95	1496.05	1.37797	0.725705	0.138463	GT	0.8545	1.17027	0.322819	LT	1.10856	0.902072	0.656351	GT	0.620115	1.6126	0.0322121	LT	0.804486	1.24303	0.191124	LT	1.29732	0.770821	0.056413	GT	-371	-370	-369	2565	2574	2582	-1222	-1218	-1214
100046_at	P	P	P	P	12525.5	9681.23	15369.8	16199.2	13847.7	18550.7	18116.2	16867.6	19364.9	18136.1	16169.1	20103.2	0.773219	1.29329	0.19632	LT	0.691398	1.44634	0.0800157	LT	0.69064	1.44793	0.083048	LT	0.894181	1.11834	0.243076	LT	0.8932	1.11957	0.294556	LT	0.998903	1.0011	0.990865	LT	1001	1004	1007	-583	-580	-578	59002	59249	59495
100048_at	P	P	P	P	144.267	114.659	173.874	159.2	70.3784	248.022	140.7	121.084	160.316	178.833	171.982	185.684	0.906198	1.10351	0.86312	LT	1.02535	0.975277	0.98465	GT	0.80671	1.2396	0.155272	LT	1.13149	0.883794	0.883162	GT	0.890214	1.12332	0.529514	LT	0.786766	1.27103	0.0270375	LT	-3146	-3128	-3111	114	115	116	-399	-396	-393
100050_at	P	A	P	P	935.8	762.483	1109.12	240.367	170.441	310.293	231.933	185.935	277.932	375.833	269.356	482.31	3.89322	0.256857	0.00018486	GT	4.03478	0.247845	8.72804e-05	GT	2.48993	0.401617	0.00167879	GT	1.03636	0.964915	0.915152	GT	0.639557	1.56358	0.102732	LT	0.617118	1.62044	0.0529139	LT	112	112	113	179	180	181	373	375	377
100051_at	P	P	P	P	2706.82	2211.95	3201.68	2306.27	1784.62	2827.91	2580.9	2287.14	2874.66	2377.8	1993.2	2762.4	1.17368	0.852022	0.397562	GT	1.04879	0.953482	0.8647	GT	1.13837	0.878449	0.499271	GT	0.89359	1.11908	0.395275	LT	0.969916	1.03102	0.810385	LT	1.08542	0.921307	0.458695	GT	-512	-511	-510	745	748	750	-676	-674	-672
100056_at	P	P	P	P	1375.67	1050.25	1701.08	1925	1634.46	2215.54	1585	1265.71	1904.29	1631	1413.72	1848.28	0.714632	1.39932	0.0904036	LT	0.867928	1.15217	0.406671	LT	0.84345	1.18561	0.311037	LT	1.21451	0.823377	0.19174	GT	1.18026	0.847273	0.193144	GT	0.971796	1.02902	0.79393	LT	-768	-766	-764	-1105	-1101	-1097	2192	2200	2207
100057_at	P	P	P	P	1822.97	1570.87	2075.06	1628.1	1306.67	1949.53	1409.73	1097.29	1722.18	1462.27	1303.55	1620.98	1.11969	0.893105	0.380903	GT	1.29313	0.773318	0.0764798	GT	1.24667	0.802136	0.0858312	GT	1.1549	0.865876	0.390163	GT	1.11341	0.898143	0.434438	GT	0.964074	1.03726	0.735267	LT	-789	-788	-786	-2347	-2341	-2335	929	932	934
100058_at	P	P	P	P	991.3	731.363	1251.24	1320.63	851.841	1789.43	1127.97	995.583	1260.35	967.867	880.99	1054.74	0.750625	1.33222	0.234923	LT	0.878838	1.13787	0.431957	LT	1.02421	0.976361	0.922643	GT	1.17081	0.85411	0.517083	GT	1.36448	0.732881	0.191505	GT	1.16542	0.858063	0.110292	GT	-11776	-11736	-11696	2890	2904	2917	-790	-787	-783
100062_at	P	P	P	P	3022.52	2557.63	3487.41	2422.97	2129.84	2716.09	3090.57	2992.53	3188.61	3572	3103.84	4040.16	1.24744	0.801639	0.168482	GT	0.977981	1.02251	0.766243	LT	0.846169	1.1818	0.224531	LT	0.783988	1.27553	0.018817	LT	0.678322	1.47423	0.012943	LT	0.86522	1.15578	0.106356	LT	3037	3044	3052	-1308	-1303	-1299	357	358	359
100064_f_at	P	P	P	P	6850.27	4064.34	9636.2	6859.8	4050.05	9669.55	7756.73	6255.4	9258.07	8565.43	8476.92	8653.94	0.99861	1.00139	0.847816	LT	0.883138	1.13233	0.49025	LT	0.799757	1.25038	0.301081	LT	0.884367	1.13075	0.519989	LT	0.80087	1.24864	0.252236	LT	0.905586	1.10426	0.32143	LT	451	453	454	-2472	-2460	-2448	1501	1508	1515
100065_r_at	P	P	P	P	774.683	455.026	1094.34	647.833	339.868	955.798	1083.57	828.41	1338.72	1209.9	672.534	1747.27	1.19581	0.836256	0.850634	GT	0.714938	1.39872	0.295588	LT	0.640287	1.5618	0.263486	LT	0.597871	1.6726	0.135774	LT	0.535444	1.86761	0.167593	LT	0.895584	1.11659	0.829152	LT	725	729	732	-498	-495	-491	526	529	533
100066_at	P	P	P	P	2468.4	2097.37	2839.43	2904.63	2259.11	3550.16	2330.33	2204.83	2455.84	2523.6	2107.78	2939.42	0.849815	1.17673	0.261779	LT	1.05925	0.944066	0.692157	GT	0.978126	1.02236	0.815132	LT	1.24645	0.802281	0.171908	GT	1.15099	0.868819	0.414501	GT	0.923416	1.08294	0.442661	LT	-3087	-3080	-3072	-1223	-1219	-1215	747	750	752
100069_at	A	A	P	A	116.75	93.2616	140.238	126.067	70.0211	182.112	119.133	75.4031	162.864	134.067	77.1476	190.986	0.926097	1.0798	0.853935	LT	0.979994	1.02041	0.941107	LT	0.870835	1.14832	0.600124	LT	1.0582	0.945003	0.931017	GT	0.940328	1.06346	0.840858	LT	0.888613	1.12535	0.739948	LT	1026	1031	1036	6917	6965	7013	-265	-263	-261
100072_at	P	P	P	P	1731.7	1483.16	1980.24	1895.97	1761.13	2030.81	1531.17	1110.53	1951.8	1976	1803.53	2148.47	0.91336	1.09486	0.386469	LT	1.13097	0.884199	0.395188	GT	0.876366	1.14108	0.244434	LT	1.23825	0.807592	0.18256	GT	0.959497	1.04221	0.51983	LT	0.774882	1.29052	0.136653	LT	-742	-740	-737	299	300	302	-350	-348	-347
100073_at	P	P	P	P	1395	1253.07	1536.93	1051.27	579.315	1523.22	976.6	614.713	1338.49	1187.73	1030.71	1344.75	1.32697	0.753596	0.115967	GT	1.42843	0.700072	0.0305353	GT	1.17451	0.851422	0.131423	GT	1.07646	0.928975	0.894886	GT	0.885103	1.12981	0.541472	LT	0.822238	1.21619	0.305821	LT	-658	-656	-655	-1115	-1111	-1108	552	553	555
100074_at	P	P	P	P	3279.9	2387.29	4172.51	3771.47	1426.69	6116.24	2460.13	1373.8	3546.47	2976.97	2492.26	3461.68	0.869662	1.14987	0.897627	LT	1.33322	0.750064	0.348029	GT	1.10176	0.907639	0.85381	GT	1.53303	0.652301	0.531018	GT	1.26688	0.789339	0.837219	GT	0.826389	1.21008	0.417267	LT	1468	1474	1480	1156	1162	1169	-1779	-1769	-1758
100079_at	P	P	P	P	6422.78	5646.97	7198.59	6707.07	6011.64	7402.5	7351.63	4942.83	9760.44	5993.2	4008.73	7977.67	0.957614	1.04426	0.631413	LT	0.873654	1.14462	0.422437	LT	1.07168	0.933116	0.561607	GT	0.912323	1.0961	0.701773	LT	1.11911	0.893565	0.463889	GT	1.22666	0.81522	0.412884	GT	-350	-349	-348	1990	1996	2002	-16939	-16891	-16844
100081_at	P	P	P	P	5960.33	4788.7	7131.97	13206.9	10678	15735.8	11892.7	9160.8	14624.6	9229.93	7564.1	10895.8	0.451306	2.21579	0.00218062	LT	0.501176	1.99531	0.00564513	LT	0.645761	1.54856	0.0322171	LT	1.1105	0.900494	0.522635	GT	1.43087	0.698874	0.0575809	GT	1.28849	0.776101	0.181202	GT	-334	-333	-333	-1163	-1159	-1156	1192	1196	1200
100084_at	P	P	P	P	2655.33	2328.18	2982.48	3358.3	2610.62	4105.98	2662.83	2384.57	2941.1	3115.07	2773.98	3456.16	0.790678	1.26474	0.100321	LT	0.997183	1.00282	0.921511	LT	0.852416	1.17314	0.142992	LT	1.26118	0.792911	0.16535	GT	1.07808	0.927572	0.651425	GT	0.854824	1.16983	0.113068	LT	-1974	-1970	-1967	-5802	-5789	-5776	-3276	-3269	-3262
100086_at	P	P	P	P	781.9	617.416	946.384	549.2	428.539	669.861	620.033	515.727	724.34	666.767	606.634	726.9	1.42371	0.702392	0.113534	GT	1.26106	0.792983	0.280183	GT	1.17267	0.852752	0.471482	GT	0.885759	1.12898	0.441608	LT	0.823676	1.21407	0.184138	LT	0.929911	1.07537	0.476748	LT	497	498	499	-891	-888	-885	-956	-953	-950
100088_at	P	P	P	P	3468.98	1975.08	4962.88	2722.53	1027.59	4417.47	4045.77	3384.94	4706.59	3880.4	2882.87	4877.93	1.27417	0.784822	0.720896	GT	0.857435	1.16627	0.495596	LT	0.893976	1.1186	0.564394	LT	0.672934	1.48603	0.273732	LT	0.701612	1.42529	0.324951	LT	1.04262	0.959126	0.756885	GT	1509	1518	1528	382	386	389	-2044	-2027	-2010
100089_at	P	P	P	P	3425.28	2531.83	4318.73	2791.67	2010.65	3572.68	3731.5	2826.78	4636.22	3646.43	3467.09	3825.77	1.22697	0.815018	0.458761	GT	0.917937	1.0894	0.609787	LT	0.939352	1.06456	0.612593	LT	0.748135	1.33666	0.207137	LT	0.765588	1.30619	0.140617	LT	1.02333	0.977203	0.948553	GT	-1790	-1786	-1781	3227	3239	3251	-830	-827	-824
100091_at	P	P	P	P	3646.05	3272.74	4019.36	3564.23	2456.59	4671.88	3082.57	2621.54	3543.59	3863.67	3376.68	4350.65	1.02295	0.97756	0.773975	GT	1.1828	0.845454	0.136928	GT	0.943676	1.05969	0.541566	LT	1.15626	0.864861	0.52386	GT	0.9225	1.08401	0.591377	LT	0.797835	1.25339	0.085916	LT	-624	-623	-622	-4774	-4761	-4748	3056	3064	3072
100093_at	P	P	P	P	1128.68	751.06	1506.31	725.8	608.858	842.742	868.3	710.95	1025.65	951.867	893.933	1009.8	1.55509	0.64305	0.23082	GT	1.29988	0.769303	0.522531	GT	1.18576	0.843343	0.754874	GT	0.835886	1.19634	0.230525	LT	0.762502	1.31147	0.0329606	LT	0.912208	1.09624	0.376433	LT	-1489	-1484	-1479	643	646	649	2085	2095	2104
100094_at	P	P	P	P	2773.08	2197.92	3348.25	3652.47	3034.2	4270.73	2516.83	2261.5	2772.16	3127.8	2605.8	3649.8	0.759236	1.31711	0.136233	LT	1.10181	0.907594	0.700238	GT	0.886592	1.12791	0.43939	LT	1.45122	0.689078	0.0239483	GT	1.16774	0.856353	0.273516	GT	0.804666	1.24275	0.0962999	LT	-423	-422	-421	-710	-707	-705	-2785	-2777	-2768
100095_at	P	P	P	P	7985.5	4650.65	11320.4	6772.03	2313.49	11230.6	8096.17	6384.91	9807.42	6612.57	6070.9	7154.24	1.17919	0.848041	0.670322	GT	0.986331	1.01386	0.73625	LT	1.20762	0.828072	0.796418	GT	0.836449	1.19553	0.46894	LT	1.02412	0.976452	0.812366	GT	1.22436	0.816753	0.183304	GT	-322	-320	-319	-1872	-1861	-1850	-1787	-1776	-1766
100099_at	P	P	P	P	4363	3148.45	5577.55	1752.77	841.3	2664.23	2933.83	2700.42	3167.24	2716.33	2293.65	3139.02	2.48921	0.401734	0.0193202	GT	1.48713	0.672435	0.183037	GT	1.60621	0.622584	0.115555	GT	0.597432	1.67383	0.139403	LT	0.645269	1.54974	0.194692	LT	1.08007	0.925865	0.424887	GT	-349	-348	-347	-1187	-1180	-1173	1484	1493	1502
100101_at	P	P	P	P	3426.43	2679.69	4173.18	3992.73	3619.9	4365.57	2864.93	2314.53	3415.34	3304.7	3227.09	3382.31	0.858167	1.16527	0.323827	LT	1.19599	0.836127	0.420138	GT	1.03684	0.964472	0.984165	GT	1.39366	0.717537	0.0353453	GT	1.2082	0.827679	0.0180997	GT	0.866927	1.1535	0.197581	LT	-834	-833	-831	-866	-863	-861	883	886	888
100104_r_at	P	A	P	P	61.45	50.2115	72.6885	72.8	42.1391	103.461	43.8333	28.4736	59.193	74.6	45.2383	103.962	0.844093	1.1847	0.465548	LT	1.4019	0.713317	0.0980021	GT	0.823727	1.214	0.439122	LT	1.66084	0.602106	0.138996	GT	0.975871	1.02473	0.952932	LT	0.587578	1.7019	0.149204	LT	-1009	-1005	-1001	-1026	-1021	-1015	-447	-444	-442
100109_s_at	P	P	P	P	312.917	256.333	369.5	258.233	159.151	357.315	184.533	152.265	216.801	196.833	129.599	264.067	1.21176	0.825246	0.322779	GT	1.69572	0.58972	0.0121626	GT	1.58975	0.629028	0.0326081	GT	1.39939	0.714599	0.284464	GT	1.31194	0.762231	0.41083	GT	0.937511	1.06665	0.822987	LT	-288	-288	-287	489	491	493	-1608	-1601	-1594
100113_s_at	P	P	P	P	641.317	513.916	768.717	338.767	61.9007	615.633	501.267	135.067	867.466	401.733	360.605	442.862	1.89309	0.528236	0.0433042	GT	1.27939	0.781621	0.280047	GT	1.59637	0.62642	0.0500635	GT	0.675821	1.47968	0.461475	LT	0.843263	1.18587	0.447365	LT	1.24776	0.801436	0.799412	GT	3256	3273	3290	456	459	462	404	407	410
100115_at	P	P	P	P	1642.72	1340	1945.44	1678.63	1077.28	2279.99	1816.6	1067.83	2565.37	2046.67	1499.43	2593.91	0.978604	1.02186	0.938717	LT	0.904281	1.10585	0.71153	LT	0.80263	1.2459	0.25698	LT	0.924052	1.08219	0.826055	LT	0.820179	1.21925	0.412356	LT	0.88759	1.12665	0.608452	LT	1180	1183	1186	847	850	853	1899	1906	1913
100116_at	P	P	P	P	4553.27	3409.53	5697	2301.13	2230.93	2371.33	2985.6	2331.44	3639.76	3157.4	2702.67	3612.13	1.97871	0.505381	0.0170095	GT	1.52508	0.655705	0.117649	GT	1.44209	0.693436	0.164334	GT	0.770744	1.29745	0.107136	LT	0.728806	1.37211	0.0130432	LT	0.945588	1.05754	0.666243	LT	-5102	-5087	-5072	337	338	340	-1620	-1613	-1606
100122_at	P	A	P	A	177.767	141.328	214.205	171.967	98.8629	245.07	210.8	130.433	291.167	145.467	113.089	177.845	1.03373	0.967373	0.818318	GT	0.843295	1.18582	0.461598	LT	1.22204	0.818301	0.328181	GT	0.815781	1.22582	0.509768	LT	1.18217	0.8459	0.607213	GT	1.44913	0.69007	0.209048	GT	-568	-566	-564	810	813	817	4233	4253	4273
100123_f_at	P	P	P	P	12952.5	8527.46	17377.5	11510.8	7702.04	15319.6	12186.8	11839.3	12534.4	10415	9266.07	11563.9	1.12524	0.888698	0.773889	GT	1.06282	0.940889	0.976882	GT	1.24364	0.804091	0.545042	GT	0.94453	1.05873	0.641353	LT	1.10522	0.904797	0.697422	GT	1.17013	0.854608	0.0545369	GT	609	611	612	1206	1212	1217	1011	1016	1020
100124_r_at	P	P	P	P	2391.3	1634.81	3147.79	1917.67	1164.85	2670.48	2541.53	2339.59	2743.47	2485.2	2142.59	2827.81	1.24698	0.801935	0.557869	GT	0.940889	1.06282	0.633463	LT	0.962216	1.03927	0.701442	LT	0.754531	1.32533	0.233281	LT	0.771635	1.29595	0.279281	LT	1.02267	0.977835	0.771102	GT	-3351	-3340	-3329	7125	7159	7192	960	965	969
100125_at	P	P	P	P	1750.47	1109.45	2391.49	1861.03	1414.76	2307.3	2772.07	1910.8	3633.33	2920.27	1794.31	4046.22	0.940589	1.06316	0.658399	LT	0.631466	1.58362	0.138756	LT	0.59942	1.66828	0.115818	LT	0.671352	1.48953	0.150543	LT	0.637282	1.56916	0.131426	LT	0.949251	1.05346	0.871401	LT	-340	-339	-337	-1690	-1680	-1671	352	354	356
100126_at	P	P	P	P	2272.9	2093.73	2452.07	1921.4	1366.43	2476.37	2171.23	1246.1	3096.37	1834.07	1707.51	1960.62	1.18294	0.845352	0.133268	GT	1.04682	0.95527	0.579284	GT	1.23927	0.806928	0.0116934	GT	0.884935	1.13003	0.723646	LT	1.04762	0.954547	0.858277	GT	1.18384	0.844712	0.595772	GT	-1262	-1259	-1257	-959	-956	-953	1203	1206	1210
100127_at	P	P	P	P	6476.5	5359.57	7593.43	6646.8	4117.2	9176.4	7134.1	5884.95	8383.25	5842.4	4691.87	6992.93	0.974379	1.0263	0.954136	LT	0.907823	1.10154	0.48613	LT	1.10853	0.902092	0.571166	GT	0.931694	1.07331	0.656573	LT	1.13768	0.878979	0.657066	GT	1.22109	0.81894	0.21162	GT	-1158	-1155	-1152	-1855	-1849	-1843	1025	1028	1031
100128_at	P	P	P	P	5220.58	3814.13	6627.04	4527.37	2028.5	7026.23	4837.93	3258.93	6416.93	5753.63	5227.11	6280.16	1.15312	0.867215	0.635808	GT	1.07909	0.926704	0.879481	GT	0.907354	1.10211	0.553715	LT	0.935806	1.0686	0.753715	LT	0.786871	1.27086	0.308107	LT	0.840848	1.18928	0.343862	LT	924	928	931	-1275	-1268	-1261	1105	1111	1117
100130_at	P	P	P	P	334.517	268.4	400.633	1003.87	634.396	1373.34	990.8	646.546	1335.05	436.833	341.042	532.625	0.333228	3.00095	0.000585446	LT	0.337623	2.96189	0.000846454	LT	0.765776	1.30586	0.123271	LT	1.01319	0.986984	0.952563	GT	2.29805	0.435151	0.0176206	GT	2.26814	0.44089	0.0246196	GT	109	110	110	263	265	267	106	107	107
100133_at	P	P	P	P	344.483	294.264	394.703	274.867	208.219	341.514	467.1	448.732	485.468	462.167	367.878	556.455	1.25327	0.79791	0.143843	GT	0.737494	1.35594	0.0266932	LT	0.745366	1.34162	0.057437	LT	0.588454	1.69937	0.0104381	LT	0.594735	1.68142	0.0281519	LT	1.01067	0.989438	0.85105	GT	1742	1745	1749	1628	1632	1637	945	947	950
100134_at	P	P	P	P	6798	4948.68	8647.32	9680.8	7952	11409.6	4200.6	3587.27	4813.93	5459.57	3489.77	7429.37	0.702215	1.42407	0.10488	LT	1.61834	0.617917	0.0746859	GT	1.24515	0.803114	0.41482	GT	2.30462	0.43391	0.00206404	GT	1.77318	0.563958	0.0415241	GT	0.769402	1.29971	0.301527	LT	-995	-992	-988	-534	-532	-529	-8300	-8258	-8215
100136_at	P	P	P	P	207.3	127.687	286.913	279.833	139.638	420.028	199.067	173.018	225.115	233	189.356	276.644	0.740798	1.3499	0.367278	LT	1.04136	0.960283	0.903095	GT	0.8897	1.12397	0.482245	LT	1.40573	0.711376	0.427528	GT	1.201	0.832638	0.732424	GT	0.854363	1.17046	0.252295	LT	-582	-579	-577	-911	-905	-899	-452	-449	-446
100138_f_at	P	P	P	P	2175.05	1330.04	3020.06	2672.13	1093.57	4250.7	1148.6	913.554	1383.65	2143.4	1285.01	3001.79	0.813975	1.22854	0.598345	LT	1.89365	0.52808	0.0887558	GT	1.01477	0.985449	0.90755	GT	2.32643	0.429844	0.0957282	GT	1.24668	0.802131	0.704159	GT	0.535878	1.8661	0.053214	LT	-583	-580	-578	-359	-357	-355	2611	2627	2642
100141_at	P	A	P	P	146.817	119.525	174.108	140.433	41.4254	239.441	136.567	119.305	153.829	191.5	153.872	229.128	1.04545	0.956522	0.602597	GT	1.07505	0.930185	0.742417	GT	0.766667	1.30435	0.126759	LT	1.02831	0.972466	0.79966	GT	0.733333	1.36364	0.319757	LT	0.713142	1.40225	0.0517894	LT	-964	-961	-957	-292	-290	-289	-283	-282	-280
100142_at	P	P	P	P	1373.12	978.995	1767.24	1085.07	483.518	1686.62	1254.37	897.02	1611.71	1247	1134.07	1359.93	1.26547	0.790222	0.429073	GT	1.09467	0.913518	0.85066	GT	1.10114	0.908153	0.882867	GT	0.865031	1.15603	0.554297	LT	0.870142	1.14924	0.483164	LT	1.00591	0.994127	0.934658	GT	-953	-950	-947	-530	-528	-525	-71141	-70799	-70456
100144_at	P	P	P	P	16343.2	12030.4	20656	24198.9	14332.5	34065.3	18574.6	14982.4	22166.8	20543.8	17226.3	23861.4	0.67537	1.48067	0.192015	LT	0.879868	1.13653	0.490468	LT	0.795528	1.25703	0.274427	LT	1.3028	0.76758	0.43425	GT	1.17792	0.848957	0.658363	GT	0.904145	1.10602	0.47767	LT	-12966	-12910	-12855	230	231	232	-676	-672	-667
100148_at	P	P	P	P	1417.37	1245.39	1589.34	969.067	782.348	1155.79	1441.8	1134.18	1749.42	1903.13	1387.29	2418.98	1.46261	0.683709	0.0118237	GT	0.983054	1.01724	0.895103	LT	0.744754	1.34272	0.0563331	LT	0.672123	1.48782	0.0529544	LT	0.509195	1.96388	0.0160876	LT	0.757593	1.31997	0.182266	LT	260	260	261	-1215	-1211	-1207	968	971	974
100151_at	P	P	P	P	3226.22	2372.8	4079.63	2345.67	920.132	3771.2	3014.23	1968.17	4060.3	2192.6	1676.73	2708.47	1.37539	0.727064	0.240938	GT	1.07033	0.934294	0.837461	GT	1.47141	0.67962	0.152567	GT	0.778197	1.28502	0.410816	LT	1.06981	0.934745	0.979281	GT	1.37473	0.727415	0.214974	GT	847	850	853	525	527	530	2099	2110	2120
100153_at	P	P	P	P	562.7	425.432	699.968	483.5	271.78	695.22	620.133	313.607	926.659	555.967	497.854	614.079	1.16381	0.85925	0.494946	GT	0.907386	1.10207	0.850652	LT	1.01211	0.988034	0.906237	GT	0.779671	1.28259	0.598427	LT	0.869656	1.14988	0.490217	LT	1.11541	0.896528	0.927278	GT	-2215	-2206	-2197	-4707	-4679	-4652	-771	-767	-762
100154_at	P	P	P	P	4290	2924.56	5655.44	12310.4	11240	13380.8	7733.07	6088.09	9378.04	12758.9	12006	13511.7	0.348486	2.86956	0.00402232	LT	0.554761	1.80258	0.0504273	LT	0.336237	2.97409	0.00334647	LT	1.59192	0.628173	0.0169015	GT	0.964851	1.03643	0.52672	LT	0.606094	1.64991	0.0117117	LT	-307	-306	-305	-370	-368	-367	195902	196879	197856
100155_at	P	A	P	P	1259.48	866.011	1652.96	536.967	98.8547	975.079	1038.23	843.268	1233.2	757.2	593.696	920.704	2.34555	0.426339	0.0461364	GT	1.2131	0.824333	0.692494	GT	1.66334	0.601199	0.180135	GT	0.517193	1.93352	0.118653	LT	0.709148	1.41014	0.297449	LT	1.37115	0.729316	0.105489	GT	1058	1064	1069	-1655	-1644	-1633	265	267	269
100156_at	P	P	P	P	5993	3717.45	8268.55	4659.43	2250.84	7068.02	5033.07	4247.23	5818.91	5539.4	4969.89	6108.91	1.28621	0.777479	0.435817	GT	1.19073	0.839824	0.682941	GT	1.08189	0.924312	0.981711	GT	0.925764	1.08019	0.628155	LT	0.841144	1.18886	0.402628	LT	0.908594	1.1006	0.346997	LT	-706	-703	-701	-321	-320	-318	1299	1306	1313
100213_f_at	P	P	P	P	60126.9	48139	72114.8	81285.7	45958.4	116613	51092.1	44324.6	57859.7	43453.1	35230.4	51675.9	0.739698	1.3519	0.22105	LT	1.17683	0.849739	0.44276	GT	1.38372	0.722691	0.126677	GT	1.59096	0.62855	0.124731	GT	1.87065	0.534573	0.0619357	GT	1.1758	0.850486	0.239315	GT	475	476	477	1208	1213	1218	-1354	-1349	-1344
100225_f_at	P	P	P	P	1457.32	1161.79	1752.85	963.1	561.432	1364.77	1145.1	725.256	1564.94	1064.9	804.947	1324.85	1.51315	0.660872	0.0671581	GT	1.27265	0.785759	0.220634	GT	1.3685	0.730727	0.107995	GT	0.841062	1.18897	0.536028	LT	0.904404	1.1057	0.620645	LT	1.07531	0.929962	0.807506	GT	-525	-523	-522	-393	-392	-390	1232	1237	1241
100277_at	A	P	P	A	120.05	90.1077	149.992	266.667	159.326	374.007	159.7	84.3836	235.016	159.333	154.185	164.482	0.450187	2.2213	0.0089352	LT	0.751722	1.33028	0.29895	LT	0.753452	1.32722	0.11764	LT	1.6698	0.598875	0.163267	GT	1.67364	0.5975	0.0765056	GT	1.0023	0.997704	0.830409	GT	-659	-655	-650	169	171	173	119	120	121
100286_at	P	P	P	P	509.567	454.746	564.387	514.967	417.323	612.61	508.133	418.942	597.324	401.267	321.211	481.322	0.989514	1.0106	0.937252	LT	1.00282	0.997187	0.971273	GT	1.2699	0.787466	0.0489132	GT	1.01345	0.986731	0.933058	GT	1.28335	0.779209	0.145975	GT	1.26632	0.789688	0.149697	GT	-706	-705	-703	-1336	-1333	-1329	-467	-466	-465
100289_at	P	P	P	P	2188.27	1523.28	2853.26	1709.57	969.694	2449.44	2058.9	1453.11	2664.69	1816.23	1553.16	2079.3	1.28001	0.781242	0.481331	GT	1.06283	0.940882	0.964622	GT	1.20484	0.829987	0.673763	GT	0.83033	1.20434	0.511465	LT	0.94127	1.06239	0.689137	LT	1.13361	0.882138	0.593119	GT	-456	-454	-453	-1251	-1245	-1240	6066	6093	6121
100290_f_at	P	P	P	P	1329.72	587.131	2072.3	1088.33	495.587	1681.08	1266	1160.21	1371.79	1907.13	1335.01	2479.26	1.22179	0.81847	0.959133	GT	1.05033	0.952083	0.667037	GT	0.697233	1.43424	0.323916	LT	0.859663	1.16325	0.493863	LT	0.570665	1.75234	0.153527	LT	0.663824	1.50642	0.0812983	LT	248	250	252	222	224	227	-1492	-1477	-1461
100293_at	P	P	P	P	180.45	150.886	210.014	144.667	128.325	161.008	178.667	151.578	205.755	194.933	125.329	264.537	1.24735	0.801699	0.164668	GT	1.00998	0.990117	0.98542	GT	0.925701	1.08026	0.713361	LT	0.809701	1.23502	0.0927652	LT	0.742134	1.34747	0.207495	LT	0.916553	1.09104	0.756122	LT	1331	1335	1340	1479	1486	1493	-392	-390	-388
100297_at	P	A	P	P	433.083	285.154	581.013	233.133	8.305	457.962	478.733	290.511	666.955	492.767	256.681	728.852	1.85766	0.538311	0.185892	GT	0.904644	1.10541	0.675215	LT	0.878881	1.13781	0.659979	LT	0.48698	2.05347	0.263786	LT	0.473111	2.11367	0.262897	LT	0.971521	1.02931	0.972849	LT	488	491	495	-647	-641	-634	2218	2240	2262
100302_at	P	P	P	P	154.667	85.9427	223.391	499.067	385.663	612.47	369.167	145.161	593.173	169.3	122.169	216.431	0.309912	3.22672	0.0514809	LT	0.418962	2.38685	0.156764	LT	0.913566	1.09461	0.593494	LT	1.35187	0.739714	0.337007	GT	2.94782	0.339233	0.00355658	GT	2.18055	0.4586	0.14403	GT	-220	-218	-216	-1121	-1109	-1097	195	197	199
100304_at	P	P	P	A	372.733	323.539	421.928	427.9	335.88	519.92	342.367	313.719	371.014	369.5	318.345	420.655	0.871076	1.14801	0.301816	LT	1.0887	0.91853	0.499158	GT	1.00875	0.991325	0.988066	GT	1.24983	0.800109	0.140137	GT	1.15805	0.86352	0.336281	GT	0.926567	1.07925	0.413088	LT	881	883	885	863	866	869	739	742	744
100306_at	P	P	P	P	351.983	203.836	500.13	858.7	288.13	1429.27	860.7	651.705	1069.69	600	433.721	766.279	0.409903	2.4396	0.107762	LT	0.40895	2.44529	0.0213358	LT	0.586639	1.70463	0.107929	LT	0.997676	1.00233	0.745918	LT	1.43117	0.698731	0.707813	GT	1.4345	0.697107	0.125033	GT	181	182	183	340	342	345	1572	1584	1597
100307_at	P	P	P	P	604.183	299.316	909.051	400.4	335.354	465.446	844.5	326.108	1362.89	792.267	172.051	1412.48	1.50895	0.662713	0.495995	GT	0.715433	1.39775	0.468936	LT	0.762601	1.3113	0.548549	LT	0.474127	2.10914	0.227985	LT	0.505385	1.97869	0.242381	LT	1.06593	0.938149	0.907878	GT	1705	1716	1726	1706	1721	1736	422	426	429
100318_at	A	P	A	A	393.617	338.87	448.363	701.667	487.177	916.156	356.7	293.639	419.761	478.067	367.003	589.131	0.560974	1.78261	0.00627031	LT	1.1035	0.906212	0.430403	GT	0.823351	1.21455	0.175056	LT	1.96711	0.508361	0.0246889	GT	1.46772	0.68133	0.146308	GT	0.74613	1.34025	0.130894	LT	537	539	541	1981	1992	2002	-2253	-2242	-2230
100320_at	P	P	P	P	278.633	126.442	430.824	236.667	76.63	396.703	437.8	193.795	681.805	430.433	164.932	695.934	1.17732	0.849384	0.87448	GT	0.63644	1.57124	0.30387	LT	0.647332	1.5448	0.287851	LT	0.540582	1.84986	0.288102	LT	0.549834	1.81873	0.256037	LT	1.01711	0.983173	0.998658	GT	-460	-457	-454	-516	-511	-506	-830	-822	-814
100321_f_at	P	P	A	P	98.5167	53.2554	143.778	115.4	54.9246	175.875	56.5667	28.4866	84.6467	117.733	95.123	140.344	0.853697	1.17138	0.640745	LT	1.7416	0.574184	0.266856	GT	0.836778	1.19506	0.421154	LT	2.04007	0.490179	0.174526	GT	0.980181	1.02022	0.774783	LT	0.480464	2.08132	0.0391595	LT	-189	-188	-187	363	366	369	-116	-115	-114
100323_at	P	P	P	P	3273.12	3002.99	3543.25	3153.4	2302.61	4004.19	3180.8	2944.56	3417.04	4470.03	3877.86	5062.2	1.03796	0.963424	0.65157	GT	1.02902	0.971795	0.719801	GT	0.732235	1.36568	0.00480348	LT	0.991386	1.00869	0.863281	LT	0.705453	1.41753	0.0704487	LT	0.711583	1.40532	0.0112796	LT	589	591	592	37470	37602	37733	483	484	486
100324_g_at	P	P	P	P	616.8	443.608	789.992	630.033	482.675	777.392	508.167	451.19	565.143	962.567	833.814	1091.32	0.978996	1.02145	0.791545	LT	1.21378	0.823876	0.586541	GT	0.640787	1.56058	0.0762252	LT	1.23982	0.806571	0.181368	GT	0.654535	1.5278	0.0307502	LT	0.527929	1.89419	0.00188947	LT	975	979	982	493	496	498	411	414	416
100326_f_at	A	A	P	P	71.4167	57.9058	84.9276	105.367	31.7812	178.952	79.7667	46.6274	112.906	128.933	89.8372	168.029	0.677792	1.47538	0.292777	LT	0.89532	1.11692	0.723531	LT	0.553904	1.80537	0.0137693	LT	1.32094	0.757039	0.627454	GT	0.817218	1.22366	0.475215	LT	0.618666	1.61638	0.161622	LT	-466	-465	-463	4004	4025	4046	-1380	-1373	-1366
100331_g_at	P	P	P	P	20935.5	19286.3	22584.8	16567.5	13519.6	19615.3	17554.9	14211.1	20898.8	16530.2	15649.4	17411	1.26365	0.791356	0.028139	GT	1.19257	0.838523	0.0808535	GT	1.2665	0.789578	0.00741401	GT	0.94375	1.0596	0.702772	LT	1.00225	0.997753	0.954523	GT	1.06199	0.941629	0.651504	GT	4945	4953	4960	-1941	-1937	-1933	1425	1427	1430
100332_s_at	P	P	P	P	3577.65	2551.19	4604.11	4416.93	3469.67	5364.2	4166.53	3635.15	4697.92	3740.4	3292.01	4188.79	0.809985	1.23459	0.399394	LT	0.858663	1.1646	0.479316	LT	0.956489	1.04549	0.694724	LT	1.0601	0.943309	0.699737	GT	1.18087	0.846832	0.260002	GT	1.11393	0.897725	0.300259	GT	-236	-236	-235	-559	-557	-555	1164	1169	1174
100333_at	P	P	A	P	176.467	88.0104	264.923	329.867	229.342	430.391	222.8	172.167	273.433	291.767	205.928	377.606	0.534964	1.86929	0.100158	LT	0.792041	1.26256	0.364569	LT	0.604821	1.65338	0.155478	LT	1.48055	0.675424	0.136175	GT	1.13058	0.884499	0.628852	GT	0.763624	1.30955	0.274383	LT	-191	-190	-189	638	642	646	-537	-533	-530
100342_i_at	P	P	P	P	11382.1	6733.55	16030.7	6300.1	3457.42	9142.78	3661.67	2956.36	4366.97	5444.8	3519.97	7369.63	1.80665	0.553509	0.099505	GT	3.10845	0.321704	0.0051407	GT	2.09045	0.478365	0.0454791	GT	1.72056	0.581208	0.100546	GT	1.15709	0.86424	0.667724	GT	0.672507	1.48697	0.141684	LT	734	736	739	746	750	753	-483	-481	-478
100343_f_at	P	P	P	P	21927.7	18106.2	25749.1	14622	11555	17689	13023.6	9799.6	16247.6	15960.7	13660.7	18260.8	1.49964	0.666828	0.0239908	GT	1.68369	0.593935	0.00983114	GT	1.37385	0.727882	0.0491344	GT	1.12273	0.890687	0.528854	GT	0.916121	1.09156	0.524941	LT	0.815978	1.22552	0.239798	LT	-3798	-3790	-3782	-1921	-1915	-1910	1150	1153	1157
100344_at	P	P	P	P	1189.7	1004.9	1374.5	1143.83	741.451	1546.22	1118.83	1022.86	1214.81	1449.7	1051.39	1848.01	1.0401	0.961447	0.749244	GT	1.06334	0.940433	0.721983	GT	0.820653	1.21854	0.261838	LT	1.02234	0.978144	0.953013	GT	0.789014	1.2674	0.369844	LT	0.771769	1.29572	0.205414	LT	-23556	-23508	-23459	-4823	-4809	-4795	-3205	-3195	-3186
100345_f_at	P	P	P	P	4567.1	2986.48	6147.72	4122.27	1716.47	6528.07	3133.5	1965.07	4301.93	2637.83	2163.95	3111.72	1.10791	0.9026	0.724614	GT	1.45751	0.686103	0.249411	GT	1.73138	0.577573	0.0930811	GT	1.31555	0.76014	0.52452	GT	1.56275	0.639899	0.263693	GT	1.18791	0.841817	0.507356	GT	-457	-455	-453	2442	2456	2471	-2228	-2215	-2201
100348_at	P	P	P	P	2046.07	1325.13	2767.01	1435	638.835	2231.16	2158.37	1444.3	2872.43	2947.37	2108.79	3785.94	1.42583	0.701346	0.325936	GT	0.94797	1.05489	0.737217	LT	0.694202	1.4405	0.187916	LT	0.664855	1.50409	0.296967	LT	0.486875	2.05391	0.108305	LT	0.732303	1.36555	0.256867	LT	235	236	237	324	327	329	-1049	-1040	-1031
100352_at	P	P	P	P	202.6	148.374	256.826	281.6	171.836	391.364	268.633	202.379	334.888	234.9	209.074	260.726	0.71946	1.38993	0.28663	LT	0.754188	1.32593	0.262788	LT	0.862495	1.15943	0.451265	LT	1.04827	0.953954	0.957868	GT	1.19881	0.834162	0.590112	GT	1.14361	0.874426	0.405054	GT	-952	-948	-945	-1763	-1754	-1744	-472	-470	-467
100353_g_at	P	P	P	P	1748.07	1408.54	2087.59	3065.73	2575.09	3556.37	2171.9	1565.16	2778.64	2294.87	1930.1	2659.63	0.570195	1.75379	0.00457247	LT	0.804856	1.24246	0.233363	LT	0.761729	1.3128	0.0786896	LT	1.41154	0.708444	0.110076	GT	1.33591	0.748554	0.0637667	GT	0.946417	1.05662	0.70201	LT	-563	-562	-560	329	330	332	1206	1211	1216
100354_at	P	A	P	P	156.867	89.1793	224.554	75.7333	-13.9682	165.435	172.133	131.175	213.091	156.933	129.198	184.669	2.0713	0.482788	0.404373	GT	0.911309	1.09732	0.578924	LT	0.999575	1.00042	0.652294	LT	0.439969	2.27289	0.142629	LT	0.482583	2.07218	0.163336	LT	1.09686	0.911696	0.590768	GT	-539	-535	-531	162	164	166	2575	2604	2634
100355_g_at	P	P	P	P	377.65	226.68	528.62	219.367	158.441	280.292	343.8	299.027	388.573	410.067	353.444	466.69	1.72155	0.580873	0.720976	GT	1.09846	0.910367	0.769656	GT	0.920948	1.08584	0.592375	LT	0.638065	1.56724	0.045363	LT	0.534954	1.86932	0.0168673	LT	0.8384	1.19275	0.140345	LT	-419	-417	-414	-430	-427	-423	-2048	-2031	-2015
100357_g_at	P	A	A	P	300.1	231.049	369.151	328.1	187.719	468.481	250.333	233.505	267.162	347.167	199.705	494.628	0.91466	1.0933	0.72324	LT	1.1988	0.834166	0.398878	GT	0.864426	1.15684	0.598167	LT	1.31065	0.762979	0.330669	GT	0.945079	1.05811	0.887819	LT	0.721075	1.38682	0.31532	LT	-21205	-21132	-21060	375	377	378	-424	-422	-420
100366_at	P	P	P	P	465.95	359.92	571.98	442.233	344.026	540.44	465.867	408.494	523.239	544.467	486.477	602.457	1.05363	0.9491	0.899314	GT	1.00018	0.999821	0.862233	GT	0.855792	1.16851	0.356203	LT	0.94927	1.05344	0.669263	LT	0.812232	1.23118	0.173603	LT	0.855639	1.16872	0.128937	LT	-547	-545	-544	463	464	466	-388	-387	-385
100367_g_at	P	P	P	P	403.933	352.65	455.217	380.067	266.26	493.873	359.267	174.886	543.647	481.667	422.471	540.862	1.0628	0.940914	0.627758	GT	1.12433	0.889421	0.424598	GT	0.838616	1.19244	0.140312	LT	1.0579	0.945273	0.758651	GT	0.789066	1.26732	0.220723	LT	0.745882	1.34069	0.296886	LT	26676	26748	26820	713	715	718	-393	-392	-390
100368_at	P	P	P	P	270.733	142.371	399.095	127.3	40.6823	213.918	253.733	139.962	367.505	218.433	143.658	293.209	2.12673	0.470204	0.29947	GT	1.067	0.937208	0.849231	GT	1.23943	0.806821	0.992934	GT	0.501708	1.99319	0.208376	LT	0.582787	1.71589	0.239641	LT	1.16161	0.860878	0.741282	GT	-254	-252	-251	-314	-311	-309	-373	-370	-367
100369_at	P	A	A	A	595.033	314.148	875.919	197.8	-117.674	513.274	225.267	127.064	323.469	167.367	4.33474	330.399	3.00826	0.332418	0.174948	GT	2.64146	0.378578	0.485806	GT	3.55527	0.281273	0.226669	GT	0.87807	1.13886	0.386216	LT	1.18184	0.846141	0.801875	GT	1.34595	0.742971	0.4295	GT	-249	-246	-244	115	116	118	70	72	73
100371_at	P	P	P	P	856.183	757.288	955.078	1228.5	735.968	1721.03	699.767	610.918	788.615	1210.4	888.278	1532.52	0.696934	1.43486	0.107607	LT	1.22353	0.817309	0.0669256	GT	0.707356	1.41372	0.024073	LT	1.75559	0.569611	0.0990628	GT	1.01495	0.985267	0.949876	GT	0.578128	1.72972	0.0205534	LT	-408	-407	-406	878	881	884	-476	-475	-473
100379_f_at	P	P	P	P	7476.53	4926.9	10026.2	36862.5	1819.38	71905.7	9315.77	7442.37	11189.2	10740.9	9084.29	12397.6	0.202822	4.93043	0.00657377	LT	0.802568	1.246	0.294033	LT	0.696079	1.43662	0.121848	LT	3.957	0.252716	0.0653605	GT	3.43197	0.291378	0.0900591	GT	0.867314	1.15298	0.308711	LT	127	127	128	73	73	74	121	122	123
100380_at	P	P	P	P	8042.67	6295.73	9789.6	5735.43	2657.93	8812.94	7944.53	7278.46	8610.6	5459.8	4271.35	6648.25	1.40228	0.713126	0.211238	GT	1.01235	0.987798	0.902005	GT	1.47307	0.678854	0.127365	GT	0.721935	1.38517	0.255247	LT	1.05048	0.951942	0.93931	GT	1.4551	0.68724	0.0290756	GT	969	973	976	4085	4104	4122	1174	1179	1184
100391_at	P	A	A	A	50.9667	37.3292	64.6041	20.7	1.14714	40.2529	53	25.3226	80.6774	87.2333	47.6291	126.838	2.46216	0.406148	0.0350217	GT	0.961635	1.0399	0.968076	LT	0.584257	1.71158	0.143482	LT	0.390566	2.56039	0.129709	LT	0.237295	4.21417	0.0398012	LT	0.607566	1.64591	0.289192	LT	291	293	295	-111	-110	-109	-122	-120	-119
100392_at	P	A	A	A	731.4	604.977	857.823	563.267	502.473	624.06	614.9	566.241	663.559	586.6	573.088	600.112	1.2985	0.770121	0.104612	GT	1.18946	0.840716	0.267037	GT	1.24685	0.802024	0.156075	GT	0.91603	1.09167	0.256799	LT	0.960223	1.04143	0.474266	LT	1.04824	0.953976	0.341545	GT	609	610	611	8479	8498	8517	667	668	670
100398_at	P	A	P	P	188.633	147.259	230.008	114.267	18.1925	210.341	167.533	142.225	192.841	170.167	105.609	234.725	1.65082	0.605761	0.136238	GT	1.12595	0.888143	0.658196	GT	1.10852	0.902103	0.65336	GT	0.682053	1.46616	0.350415	LT	0.671499	1.48921	0.377015	LT	0.984525	1.01572	0.936981	LT	-5675	-5642	-5609	717	723	729	-172	-171	-169
100400_at	P	P	P	P	1353.8	928.088	1779.51	1341.9	354.885	2328.92	1540.37	1514.56	1566.17	1325.83	930.541	1721.13	1.00887	0.99121	0.828768	GT	0.878882	1.13781	0.512632	LT	1.02109	0.979342	0.874905	GT	0.871156	1.1479	0.525749	LT	1.01212	0.988027	0.767468	GT	1.16181	0.860726	0.339538	GT	-441	-438	-436	508	513	517	-548	-543	-538
100401_at	P	P	P	P	611.35	499.448	723.252	622.933	499.824	746.043	533.967	458.771	609.162	640	612.544	667.456	0.981405	1.01895	0.843984	LT	1.14492	0.873422	0.445368	GT	0.955234	1.04686	0.642625	LT	1.16661	0.857181	0.285637	GT	0.973333	1.0274	0.73556	LT	0.834323	1.19858	0.0681441	LT	1133	1136	1138	2174	2180	2186	-1253	-1249	-1246
100404_at	P	P	P	P	2494.23	2148.68	2839.78	3240.5	3080.46	3400.54	2423.8	1834.37	3013.23	2959.97	2723.38	3196.55	0.769706	1.2992	0.0381311	LT	1.02906	0.971762	0.822407	GT	0.842656	1.18672	0.139267	LT	1.33695	0.747971	0.0744927	GT	1.09478	0.913429	0.125311	GT	0.818861	1.22121	0.178291	LT	1780	1784	1789	383	384	385	-469	-467	-466
100405_at	P	P	P	P	784.383	615.24	953.526	609.967	373.593	846.341	511.133	439.56	582.707	752.367	547.484	957.249	1.28594	0.777638	0.235383	GT	1.5346	0.651637	0.0367619	GT	1.04255	0.959182	0.848791	GT	1.19336	0.837969	0.573623	GT	0.810731	1.23346	0.427412	LT	0.679367	1.47196	0.0909304	LT	5800	5832	5864	330	333	335	-594	-589	-585
100407_at	P	P	P	P	351.983	324.167	379.8	343.567	283.971	403.162	364.367	313	415.733	474.933	401.127	548.74	1.0245	0.976088	0.744237	GT	0.966014	1.03518	0.674751	LT	0.741122	1.34931	0.00642941	LT	0.942915	1.06054	0.631247	LT	0.7234	1.38236	0.055375	LT	0.767195	1.30345	0.0705404	LT	-600	-598	-597	-358	-357	-356	-791	-789	-787
100408_at	P	P	P	P	1039.75	839.162	1240.34	1605.77	1052.5	2159.04	946.7	731.554	1161.85	1153.37	1025.5	1281.23	0.64751	1.54438	0.0372588	LT	1.09829	0.910507	0.572746	GT	0.901491	1.10927	0.389311	LT	1.69617	0.589563	0.061527	GT	1.39224	0.718265	0.155245	GT	0.820814	1.2183	0.172031	LT	-424	-423	-422	772	775	778	-625	-623	-620
100410_at	P	P	P	P	1024.97	799.274	1250.66	844.1	546.352	1141.85	1351.43	1002.69	1700.18	1245.8	825.614	1665.99	1.21427	0.823539	0.39754	GT	0.758429	1.31851	0.185583	LT	0.822738	1.21545	0.366438	LT	0.624596	1.60103	0.12074	LT	0.677557	1.47589	0.207656	LT	1.08479	0.921836	0.702705	GT	-506	-504	-502	-1159	-1153	-1148	-1648	-1640	-1632
100412_g_at	P	P	P	P	1877.97	820.259	2935.67	2740.83	1148.87	4332.79	1443.13	1212.82	1673.45	1319.3	1172.13	1466.47	0.685181	1.45947	0.272885	LT	1.30131	0.768455	0.721128	GT	1.42346	0.702515	0.544103	GT	1.89922	0.526531	0.120606	GT	2.07749	0.48135	0.0819076	GT	1.09386	0.914191	0.421225	GT	-486	-484	-481	-464	-461	-458	-1421	-1412	-1403
100413_at	P	P	P	P	890.683	771.512	1009.85	483.367	366.725	600.008	612.6	443.686	781.514	860.9	658.533	1063.27	1.84267	0.542692	0.00227544	GT	1.45394	0.687787	0.031904	GT	1.0346	0.966561	0.785042	GT	0.789041	1.26736	0.309118	LT	0.561467	1.78105	0.0325223	LT	0.711581	1.40532	0.158914	LT	606	607	608	-1091	-1088	-1084	1182	1185	1189
100415_at	P	A	A	A	85.1667	62.3911	107.942	85.7333	41.2529	130.214	72.6	58.269	86.931	99.3667	79.5302	119.203	0.99339	1.00665	0.97297	LT	1.17309	0.852446	0.595046	GT	0.857095	1.16673	0.410678	LT	1.1809	0.846812	0.697909	GT	0.862798	1.15902	0.49871	LT	0.730627	1.36869	0.106865	LT	-1240	-1235	-1231	-561	-558	-555	-232	-231	-230
100416_at	P	A	A	P	148.383	103.551	193.216	65.4667	28.1634	102.77	122.633	92.841	152.426	158.433	117.27	199.596	2.26655	0.4412	0.0262134	GT	1.20998	0.826463	0.55199	GT	0.936566	1.06773	0.664919	LT	0.533841	1.87322	0.105334	LT	0.413213	2.42006	0.0484025	LT	0.774037	1.29193	0.215936	LT	-4790	-4762	-4733	318	320	323	151	153	154
100417_at	P	P	P	P	509.117	436.937	581.296	299.767	193.646	405.888	313.5	224.211	402.789	663.233	474.149	852.318	1.69838	0.588798	0.0111072	GT	1.62398	0.615772	0.0124224	GT	0.767628	1.30271	0.110351	LT	0.956194	1.04581	0.831356	LT	0.451978	2.2125	0.024681	LT	0.472684	2.11558	0.0229723	LT	23865	23931	23997	584	587	589	380	381	383
100422_i_at	P	P	P	P	2550.72	1998.75	3102.68	1713.5	1066.45	2360.55	1585	1411.42	1758.58	1587.87	1470.36	1705.38	1.4886	0.671772	0.0616874	GT	1.60928	0.621394	0.0165424	GT	1.60638	0.622518	0.0157609	GT	1.08107	0.925007	0.81537	GT	1.07912	0.92668	0.82468	GT	0.998195	1.00181	0.960454	LT	-1983	-1978	-1973	-8602	-8570	-8538	612	614	616
100423_f_at	P	A	A	A	1523.6	1257.55	1789.65	697.7	369.618	1025.78	811.3	694.846	927.754	815.633	682.002	949.264	2.18375	0.457929	0.00726891	GT	1.87797	0.532489	0.0033297	GT	1.868	0.535333	0.00394232	GT	0.859978	1.16282	0.487986	LT	0.855409	1.16903	0.488803	LT	0.994687	1.00534	0.979639	LT	-3797	-3785	-3773	-1610	-1603	-1595	349	351	353
100425_at	P	A	A	A	646.35	547.462	745.238	656.167	583.072	729.261	615.3	432.13	798.47	783.967	488.663	1079.27	0.985039	1.01519	0.829734	LT	1.05046	0.951961	0.717651	GT	0.824461	1.21291	0.345133	LT	1.06642	0.937719	0.648417	GT	0.836983	1.19477	0.506245	LT	0.784855	1.27412	0.411329	LT	1945	1950	1955	-91173	-90857	-90541	-695	-693	-690
100428_at	P	P	P	P	1303.42	1129.65	1477.18	2950.03	230.919	5669.15	2234.47	1008.84	3460.1	1383.37	1217.65	1549.08	0.441831	2.26331	0.0755592	LT	0.583323	1.71431	0.102056	LT	0.942206	1.06134	0.530838	LT	1.32024	0.757438	0.766346	GT	2.1325	0.468933	0.272616	GT	1.61524	0.619104	0.324863	GT	-630	-627	-624	-2563	-2545	-2527	-183	-182	-180
100429_at	P	P	P	P	353.85	301.249	406.451	299.267	241.997	356.537	273.033	172.577	373.489	253.533	216.998	290.069	1.18239	0.845744	0.261837	GT	1.296	0.771608	0.159577	GT	1.39567	0.716499	0.0376078	GT	1.09608	0.912341	0.620257	GT	1.18038	0.847182	0.244818	GT	1.07691	0.92858	0.873783	GT	-2157	-2151	-2145	362	363	365	-333	-332	-330
100435_at	P	P	P	P	1621.65	1165.14	2078.16	1416.23	565.53	2266.94	2169.67	1248.35	3090.99	1847.63	1414.19	2281.08	1.14504	0.873329	0.596145	GT	0.747419	1.33794	0.339106	LT	0.87769	1.13935	0.496609	LT	0.652742	1.532	0.301316	LT	0.766512	1.30461	0.33904	LT	1.1743	0.851575	0.698412	GT	927	931	936	380	383	385	1979	1992	2006
100439_i_at	P	A	P	P	1340.02	1121.61	1558.43	835.167	502.966	1167.37	921.167	762.586	1079.75	1031.63	791.004	1272.26	1.60449	0.623251	0.0260238	GT	1.4547	0.687429	0.0265872	GT	1.29893	0.769866	0.107327	GT	0.90664	1.10297	0.581317	LT	0.809558	1.23524	0.362393	LT	0.892921	1.11992	0.499554	LT	1225	1228	1231	3613	3625	3638	-4957	-4939	-4922
100440_f_at	P	P	P	P	2483.55	2210.76	2756.34	1224.93	1041.32	1408.55	1654.07	1121.17	2186.96	2295.17	1128.17	3462.17	2.0275	0.493219	0.000177358	GT	1.50148	0.666009	0.0152863	GT	1.08208	0.924148	0.483893	GT	0.740559	1.35033	0.188964	LT	0.533701	1.87371	0.0915219	LT	0.720674	1.38759	0.377125	LT	654	655	656	13287	13326	13366	-575	-573	-571
100441_s_at	P	P	P	P	328.533	213.954	443.113	192.2	86.2386	298.161	394.033	269.344	518.723	243.467	121.316	365.617	1.70933	0.585024	0.134196	GT	0.83377	1.19937	0.432826	LT	1.3494	0.741071	0.377004	GT	0.487776	2.05012	0.086702	LT	0.78943	1.26674	0.556756	LT	1.61843	0.617883	0.169751	GT	-1829	-1821	-1813	555	559	562	762	766	771
100442_at	P	P	P	P	801.3	734.299	868.301	1290.3	1141.11	1439.49	960.7	720.764	1200.64	1133.47	1015.01	1251.93	0.621018	1.61026	0.000392167	LT	0.834079	1.19893	0.169718	LT	0.706946	1.41453	0.00221827	LT	1.34308	0.744556	0.104756	GT	1.13837	0.878452	0.183178	GT	0.847577	1.17983	0.286164	LT	-1169	-1167	-1165	1388	1391	1395	673	674	676
100443_at	P	P	P	P	2089.73	1453.35	2726.12	1208.83	736.024	1681.64	1669.77	1325.27	2014.27	1160.63	901.273	1419.99	1.72872	0.578463	0.188815	GT	1.25151	0.799033	0.668834	GT	1.80051	0.555398	0.158216	GT	0.723953	1.3813	0.20581	LT	1.04153	0.960127	0.964628	GT	1.43867	0.695087	0.0819322	GT	-250	-249	-248	-903	-899	-894	-1712	-1703	-1695
100444_at	P	P	P	P	2416.95	1611.57	3222.33	1861.83	1511.28	2212.39	1716.57	1171.05	2262.09	1317.63	1044.32	1590.95	1.29816	0.770323	0.566587	GT	1.40801	0.71022	0.402021	GT	1.83431	0.545164	0.123653	GT	1.08463	0.921977	0.627558	GT	1.41301	0.707707	0.0754121	GT	1.30277	0.767598	0.247885	GT	-256	-255	-254	-827	-822	-818	9568	9618	9669
100451_at	P	P	P	P	1038.8	799.361	1278.24	1217.13	772.33	1661.94	1058.37	901.453	1215.28	1213.17	1056.08	1370.26	0.853481	1.17167	0.483303	LT	0.981512	1.01884	0.799381	LT	0.856271	1.16785	0.364521	LT	1.15001	0.869557	0.590564	GT	1.00327	0.996741	0.902199	GT	0.8724	1.14626	0.254331	LT	-988	-986	-983	-1150	-1145	-1140	1777	1784	1791
100457_at	P	P	P	P	1459.68	1303.94	1615.43	710.567	446.137	974.997	1220.67	1163.09	1278.24	1000.93	796.561	1205.31	2.05425	0.486795	0.00236409	GT	1.19581	0.836254	0.0775941	GT	1.45832	0.68572	0.00951509	GT	0.582114	1.71788	0.0542443	LT	0.709904	1.40864	0.194491	LT	1.21953	0.819989	0.130041	GT	4563	4576	4589	770	773	776	627	630	632
100459_at	P	P	P	P	984.583	552.787	1416.38	449.267	313.433	585.1	839.233	610.194	1068.27	1313.63	827.006	1800.26	2.19153	0.456301	0.264959	GT	1.17319	0.852374	0.961208	GT	0.749512	1.3342	0.387059	LT	0.53533	1.86801	0.0411086	LT	0.342003	2.92395	0.0101205	LT	0.638864	1.56528	0.1316	LT	368	371	373	136	138	139	-1259	-1246	-1233
100460_at	P	P	P	P	972.617	651.795	1293.44	539.933	240.483	839.383	995.133	843.47	1146.8	1049.4	990.114	1108.69	1.80136	0.555135	0.147043	GT	0.977373	1.02315	0.731566	LT	0.926831	1.07895	0.595464	LT	0.542574	1.84307	0.0785187	LT	0.514516	1.94357	0.0574537	LT	0.948288	1.05453	0.53141	LT	-6869	-6843	-6817	1025	1031	1036	383	385	387
100461_at	P	P	P	P	4292.47	4055.57	4529.36	3035.4	2752.19	3318.61	3811	2594.23	5027.77	3001.97	2872.39	3131.54	1.41414	0.707146	0.000276371	GT	1.12634	0.887835	0.246571	GT	1.42988	0.699357	7.66787e-05	GT	0.796484	1.25552	0.293487	LT	1.01114	0.988986	0.870876	GT	1.2695	0.787711	0.261367	GT	-1851	-1848	-1844	-1348	-1345	-1341	491	493	494
100462_at	P	P	P	P	231.4	170.719	292.081	284.667	199.935	369.398	294.633	182.085	407.182	388.833	219.991	557.675	0.812881	1.23019	0.342236	LT	0.785383	1.27326	0.372009	LT	0.595114	1.68035	0.0815558	LT	0.966173	1.03501	0.972143	LT	0.732105	1.36593	0.341064	LT	0.757737	1.31972	0.432258	LT	-1778	-1770	-1763	931	937	942	2925	2942	2959
100464_at	P	P	P	P	433.867	308.47	559.264	694	433.643	954.357	765.9	634.125	897.675	652.633	449.454	855.813	0.625168	1.59957	0.0813505	LT	0.56648	1.76529	0.0171773	LT	0.664794	1.50423	0.0859482	LT	0.906124	1.1036	0.589719	LT	1.06338	0.940394	0.872823	GT	1.17355	0.852113	0.379837	GT	164	165	165	671	674	677	1041	1046	1050
100469_at	P	P	P	P	830.983	608.625	1053.34	673.533	446.403	900.664	734.467	723.857	745.076	1024.07	920.928	1127.21	1.23377	0.810526	0.443043	GT	1.13141	0.883852	0.725933	GT	0.811454	1.23236	0.261529	LT	0.917037	1.09047	0.562367	LT	0.657705	1.52044	0.0849524	LT	0.717206	1.3943	0.00295709	LT	190	191	191	-1720	-1711	-1703	276	277	279
100470_at	A	P	A	A	86.75	61.3334	112.167	158.867	60.9192	256.814	93.6	40.6436	146.556	68.5	31.1133	105.887	0.546055	1.83132	0.180748	LT	0.926816	1.07896	0.897448	LT	1.26642	0.789625	0.387409	GT	1.69729	0.589173	0.410901	GT	2.31922	0.431179	0.208975	GT	1.36642	0.731838	0.518818	GT	-301	-299	-297	951	960	970	-1122	-1111	-1100
100473_at	P	A	P	A	533.717	336.507	730.926	166.867	150.111	183.623	388.667	220.706	556.627	274.6	254.809	294.391	3.19846	0.31265	0.00466816	GT	1.3732	0.728227	0.378059	GT	1.94361	0.514505	0.0631042	GT	0.429331	2.3292	0.0405888	LT	0.607672	1.64563	0.00136449	LT	1.41539	0.706518	0.332643	GT	-3557	-3543	-3528	-518	-515	-512	-1417	-1409	-1401
100475_at	P	P	P	P	1996.78	1568.82	2424.75	9739.7	7042.26	12437.1	8370.03	6142.09	10598	10898.5	8909.76	12887.3	0.205015	4.87769	4.31015e-05	LT	0.238563	4.19176	8.07183e-05	LT	0.183216	5.45805	1.64565e-05	LT	1.16364	0.859373	0.468859	GT	0.893671	1.11898	0.488779	LT	0.767996	1.30209	0.162959	LT	400	401	403	-744	-739	-735	6568	6605	6643
100482_at	P	P	P	P	2162.72	1931.51	2393.93	2509.53	2190.84	2828.23	2861.9	2206.57	3517.23	2691.27	2593.3	2789.24	0.8618	1.16036	0.132399	LT	0.755693	1.32329	0.0472533	LT	0.803605	1.24439	0.0256269	LT	0.876877	1.14041	0.436622	LT	0.932473	1.07242	0.328567	LT	1.0634	0.940378	0.727884	GT	1975	1979	1982	-663	-662	-660	-257748	-257143	-256539
100483_at	P	A	P	P	491.617	413.519	569.714	320.7	250.169	391.231	438.233	366.041	510.425	465.667	314.17	617.164	1.53295	0.652338	0.0192681	GT	1.12181	0.891413	0.439289	GT	1.05573	0.947215	0.693598	GT	0.731802	1.36649	0.0896012	LT	0.68869	1.45203	0.153668	LT	0.941088	1.0626	0.840641	LT	4361	4373	4385	607	609	612	520	522	524
100486_at	P	P	P	P	511.267	446.238	576.295	419.967	376.402	463.531	679.6	616.423	742.777	454.433	400.474	508.393	1.2174	0.821424	0.107757	GT	0.752305	1.32925	0.0229724	LT	1.12506	0.888838	0.321184	GT	0.617962	1.61822	0.00252718	LT	0.924155	1.08207	0.383034	LT	1.49549	0.668678	0.00592419	GT	363	364	364	-5168	-5148	-5129	827	830	833
100488_at	P	P	P	P	1531.18	1142.11	1920.26	1700.13	705.28	2694.99	1662.73	1185.61	2139.86	1113.43	996.096	1230.77	0.900625	1.11034	0.806238	LT	0.920883	1.08591	0.644541	LT	1.37519	0.727172	0.204325	GT	1.02249	0.978002	0.910593	GT	1.52693	0.654909	0.283597	GT	1.49334	0.66964	0.0676834	GT	-420	-418	-417	-7353	-7312	-7271	-1252	-1245	-1238
100489_at	P	P	P	P	293.283	217.347	369.22	277.6	232.682	322.518	457.833	416.277	499.389	467.367	427.13	507.603	1.0565	0.946525	0.905019	GT	0.64059	1.56106	0.0315652	LT	0.627523	1.59357	0.0265394	LT	0.606334	1.64926	0.00554731	LT	0.593966	1.6836	0.00456112	LT	0.979602	1.02082	0.765624	LT	194	194	195	4293	4308	4323	1565	1570	1576
100491_at	P	P	P	P	170.817	135.69	205.943	177.933	129.384	226.483	175.467	118.192	232.742	187.867	105.994	269.74	0.960004	1.04166	0.805335	LT	0.973499	1.02722	0.887491	LT	0.909244	1.09981	0.718827	LT	1.01406	0.986137	0.933421	GT	0.947126	1.05583	0.910594	LT	0.933996	1.07067	0.858144	LT	1365	1369	1373	-2006	-1997	-1989	-1371	-1366	-1360
100492_at	P	P	P	P	2590.83	1843.62	3338.05	2610.93	1437.51	3784.36	1882	1298.55	2465.45	2340.43	1879.42	2801.45	0.992302	1.00776	0.939433	LT	1.37664	0.726407	0.346563	GT	1.10699	0.903352	0.870948	GT	1.38732	0.720815	0.335435	GT	1.11558	0.896397	0.796792	GT	0.804125	1.24359	0.274972	LT	-322	-321	-319	-4614	-4590	-4567	-895	-891	-886
100495_at	P	A	P	P	1255.7	798.972	1712.43	873.3	540.234	1206.37	1333.27	701.044	1965.49	888	772.814	1003.19	1.43788	0.695469	0.497081	GT	0.941822	1.06177	0.776934	LT	1.41408	0.707175	0.555847	GT	0.655008	1.5267	0.291136	LT	0.983446	1.01683	0.820418	LT	1.50143	0.666033	0.27389	GT	938	942	947	-1486	-1476	-1467	1346	1355	1363
100496_at	A	P	A	A	256.867	148.04	365.694	246.233	147.146	345.321	155.067	131.719	178.414	143.367	49.4354	237.298	1.04318	0.958604	0.898127	GT	1.65649	0.603685	0.320628	GT	1.79168	0.558137	0.214272	GT	1.58792	0.629755	0.108902	GT	1.71751	0.582239	0.172564	GT	1.08161	0.924549	0.611539	GT	347	349	351	334	337	339	-174	-173	-171
100498_g_at	P	P	P	P	235.7	197.672	273.728	518.9	484.29	553.51	438.833	151.306	726.361	357.367	270.866	443.868	0.45423	2.20153	0.000247928	LT	0.537106	1.86183	0.0538053	LT	0.659547	1.51619	0.021091	LT	1.18245	0.845699	0.435537	GT	1.45201	0.6887	0.0384905	GT	1.22796	0.814356	0.735722	GT	401	403	405	-1192	-1185	-1178	316	317	319
100499_at	P	P	P	P	961.9	680.858	1242.94	1637.13	1365.78	1908.48	1940.8	38.0148	3843.59	1151.5	875.608	1427.39	0.587551	1.70198	0.0411024	LT	0.49562	2.01767	0.206475	LT	0.835345	1.19711	0.383746	LT	0.843535	1.18549	0.912826	LT	1.42174	0.703364	0.0748996	GT	1.68545	0.593312	0.560706	GT	161	161	162	-488	-484	-480	172	174	175
100500_at	P	P	P	P	477.233	398.062	556.405	712.667	538.621	886.712	696.833	450.736	942.93	488.467	405.081	571.852	0.669645	1.49333	0.0309408	LT	0.68486	1.46015	0.0788646	LT	0.977003	1.02354	0.816642	LT	1.02272	0.977783	0.870065	GT	1.45899	0.685407	0.0861809	GT	1.42657	0.700981	0.20243	GT	-631	-629	-628	356	358	359	1230	1235	1239
100509_at	P	P	P	P	1737.25	1315.2	2159.3	1325.87	1097.9	1553.83	2412.23	1619.23	3205.24	2224.13	1765.33	2682.93	1.31028	0.763199	0.294713	GT	0.720183	1.38854	0.167533	LT	0.781091	1.28026	0.225486	LT	0.549643	1.81936	0.032786	LT	0.596127	1.67749	0.0194541	LT	1.08457	0.922022	0.744616	GT	66	66	67	1404	1412	1419	281	283	284
100511_at	P	P	P	P	1130.7	708.053	1553.35	1034.87	488.17	1581.56	1257.83	811.638	1704.03	828.867	695.989	961.744	1.0926	0.915244	0.988494	GT	0.898927	1.11244	0.630985	LT	1.36415	0.733056	0.699502	GT	0.822738	1.21545	0.530736	LT	1.24853	0.800941	0.580628	GT	1.51753	0.658964	0.154375	GT	-329	-328	-326	1111	1119	1126	2338	2353	2369
100512_at	P	P	P	P	1320.87	882.057	1759.68	1161.87	853.012	1470.72	1349.43	1186.81	1512.05	1168.67	873.995	1463.34	1.13685	0.879624	0.791808	GT	0.978831	1.02163	0.733414	LT	1.13023	0.884773	0.807834	GT	0.861003	1.16144	0.325997	LT	0.994181	1.00585	0.978605	LT	1.15468	0.866043	0.354791	GT	4175	4195	4215	239	240	242	-1905	-1892	-1880
100513_at	P	P	P	P	3390.85	2573.95	4207.75	2120.97	1556.36	2685.57	3824.17	3288.21	4360.13	3516.43	3332.99	3699.87	1.59873	0.625497	0.0835178	GT	0.88669	1.12779	0.468673	LT	0.964287	1.03704	0.706825	LT	0.554622	1.80303	0.0150112	LT	0.603159	1.65794	0.0165924	LT	1.08751	0.919529	0.35457	GT	654	656	658	-9663	-9625	-9586	-1822	-1815	-1808
100514_at	P	P	P	P	1262.03	746.916	1777.15	1313.33	698.799	1927.87	3229.9	2237.51	4222.29	2773.27	1937.36	3609.17	0.960939	1.04065	0.811886	LT	0.390734	2.55928	0.0170452	LT	0.455071	2.19746	0.031983	LT	0.406617	2.45931	0.039012	LT	0.473569	2.11162	0.0614121	LT	1.16466	0.858623	0.556995	GT	473	476	478	-721	-716	-711	604	608	613
100515_at	P	P	P	P	2258.17	1898.94	2617.4	1531.13	1087.13	1975.14	1788.6	1600.3	1976.9	1832.47	1691.57	1973.36	1.47483	0.678043	0.0362213	GT	1.26253	0.792058	0.125114	GT	1.23231	0.811484	0.16157	GT	0.856051	1.16815	0.311476	LT	0.835559	1.1968	0.243768	LT	0.976061	1.02453	0.719075	LT	-5265	-5254	-5244	-4356	-4344	-4332	1270	1274	1277
100516_at	P	P	P	P	1027.1	805.297	1248.9	3645	2695.53	4594.47	2095.93	1063.41	3128.46	1202.43	1083.42	1321.45	0.281783	3.54883	0.000311005	LT	0.490044	2.04063	0.0369405	LT	0.854185	1.17071	0.315645	LT	1.73908	0.575016	0.136995	GT	3.03135	0.329886	0.00196841	GT	1.74308	0.573698	0.188425	GT	645	648	650	692	696	699	305	307	309
100521_at	P	P	P	P	242.483	197.976	286.991	689.533	195.133	1183.93	411.567	260.818	562.315	360.067	324.078	396.056	0.351663	2.84363	0.0242904	LT	0.589171	1.6973	0.0280807	LT	0.67344	1.48491	0.0226736	LT	1.67539	0.596877	0.460201	GT	1.91502	0.522189	0.326515	GT	1.14303	0.874868	0.638833	GT	370	372	373	417	420	423	-1186	-1178	-1171
100522_s_at	P	P	P	P	7719.93	4999.1	10440.8	7492.1	3223.16	11761	6221.9	5778.96	6664.84	4996.2	3937.24	6055.16	1.03041	0.970488	0.889542	GT	1.24077	0.805953	0.639144	GT	1.54516	0.647182	0.236792	GT	1.20415	0.830461	0.819977	GT	1.49956	0.666862	0.43055	GT	1.24533	0.803002	0.125172	GT	-13001	-12942	-12883	1452	1462	1471	-679	-675	-670
100523_r_at	P	P	P	P	600.8	431.438	770.162	701.3	305.104	1097.5	522.133	489.349	554.917	442.367	277.582	607.152	0.856695	1.16728	0.746332	LT	1.15066	0.869063	0.744163	GT	1.35815	0.736296	0.330161	GT	1.34314	0.744522	0.608887	GT	1.58534	0.630781	0.378946	GT	1.18032	0.847229	0.384713	GT	-553	-551	-548	813	818	824	-512	-509	-505
100527_at	P	P	P	P	2592.83	1891.26	3294.41	2397.3	1603.99	3190.61	2281.2	1572.42	2989.98	2014.57	1824.64	2204.5	1.08156	0.924587	0.857308	GT	1.13661	0.87981	0.730241	GT	1.28704	0.776975	0.450831	GT	1.05089	0.951571	0.865305	GT	1.18998	0.840348	0.48909	GT	1.13235	0.883117	0.60123	GT	-507	-505	-504	-944	-940	-936	1439	1445	1452
100528_at	P	P	P	P	559.783	356.159	763.408	310.333	235.714	384.952	825.267	515.423	1135.11	542.033	376.193	707.874	1.80381	0.554381	0.147588	GT	0.678306	1.47426	0.22547	LT	1.03275	0.968291	0.894267	GT	0.37604	2.65929	0.0200983	LT	0.572536	1.74662	0.0477509	LT	1.52254	0.656798	0.205342	GT	1523	1530	1537	-5039	-5007	-4975	549	552	556
100530_at	P	P	P	P	1310.58	914.398	1706.77	844.167	533.955	1154.38	1081.17	997.318	1165.02	870.567	803.728	937.405	1.55252	0.644115	0.200567	GT	1.21219	0.824951	0.644578	GT	1.50544	0.664259	0.226901	GT	0.780792	1.28075	0.254706	LT	0.969675	1.03127	0.75927	LT	1.24191	0.80521	0.0174654	GT	-2401	-2394	-2387	512	514	517	-1813	-1805	-1798
100533_s_at	P	P	P	P	153	115.346	190.654	811.767	424.202	1199.33	366.833	252.2	481.467	527.3	426.454	628.146	0.188478	5.30566	0.000294903	LT	0.417083	2.3976	0.00329025	LT	0.290157	3.44641	0.000254228	LT	2.2129	0.451895	0.0712172	GT	1.53948	0.649571	0.25592	GT	0.695682	1.43744	0.107579	LT	443	444	446	267	269	271	-1376	-1368	-1360
100534_at	P	P	P	P	2315.25	1879.05	2751.45	2371.33	2079.27	2663.39	1771.37	1671.25	1871.48	2217.97	2114.82	2321.11	0.976349	1.02422	0.773678	LT	1.30704	0.765087	0.0920044	GT	1.04386	0.957981	0.858111	GT	1.3387	0.746992	0.01541	GT	1.06915	0.935325	0.412155	GT	0.798644	1.25212	0.00394581	LT	-4825	-4817	-4809	2819	2825	2832	3950	3959	3969
100535_at	P	P	P	P	1099	745.524	1452.48	572.033	343.185	800.881	673.767	549.809	797.725	824.167	792.789	855.545	1.92122	0.520503	0.0590294	GT	1.63113	0.613072	0.127561	GT	1.33347	0.749924	0.390524	GT	0.849008	1.17785	0.451314	LT	0.694075	1.44077	0.1346	LT	0.817513	1.22322	0.104595	LT	411	412	414	256	258	259	-805	-801	-797
100538_at	P	P	P	P	11111.2	8283.54	13939	9474.93	6626.14	12323.7	10528.9	7935.09	13122.8	10850.3	7692.99	14007.6	1.1727	0.852733	0.581364	GT	1.05531	0.947592	0.92166	GT	1.02405	0.976515	0.997124	GT	0.899895	1.11124	0.61352	LT	0.873242	1.14516	0.581544	LT	0.970382	1.03052	0.921099	LT	-367	-366	-365	-1366	-1361	-1355	-1508	-1502	-1496
100539_at	P	P	P	P	2388.07	1820.1	2956.03	2982.73	1866.29	4099.17	2354.93	2002.73	2707.14	2184.73	1996	2373.47	0.80063	1.24902	0.382224	LT	1.01407	0.986125	0.925158	GT	1.09307	0.914854	0.789174	GT	1.26659	0.789522	0.43675	GT	1.36526	0.73246	0.289587	GT	1.0779	0.927726	0.476641	GT	-308	-307	-306	-385	-383	-382	1253	1259	1265
100540_at	P	P	P	P	6571.58	6210.48	6932.68	4862.13	3444.94	6279.33	5856.9	4595.58	7118.22	5889.87	4310.31	7469.42	1.35158	0.739872	0.0258284	GT	1.12202	0.891246	0.172941	GT	1.11574	0.896263	0.265739	GT	0.830155	1.20459	0.367294	LT	0.825508	1.21137	0.42678	LT	0.994403	1.00563	0.985326	LT	-771	-770	-768	-942	-939	-937	-737	-735	-733
100543_s_at	P	P	P	P	1515.15	1345.17	1685.13	1606.93	1274.68	1939.18	1477	1303.83	1650.17	1490.43	1265.94	1714.93	0.942883	1.06058	0.621837	LT	1.02583	0.974821	0.831546	GT	1.01658	0.983687	0.890342	GT	1.08797	0.919142	0.557238	GT	1.07817	0.927502	0.618963	GT	0.990987	1.0091	0.951739	LT	1344	1346	1348	-26083	-26018	-25952	26721	26788	26854
100544_at	P	P	P	P	223.367	158.354	288.379	331.3	277.122	385.478	213.967	195.034	232.9	211.2	160.913	261.487	0.674213	1.48321	0.181772	LT	1.04393	0.957917	0.890213	GT	1.05761	0.945531	0.950848	GT	1.54837	0.64584	0.0117539	GT	1.56866	0.637489	0.0342677	GT	1.0131	0.98707	0.852097	GT	-307	-306	-305	460	462	464	-1110	-1105	-1101
100547_at	P	A	A	A	841.367	696.361	986.373	467.3	223.965	710.635	623.4	409.986	836.814	696.367	489.864	902.87	1.80049	0.555406	0.0306361	GT	1.34964	0.740937	0.121673	GT	1.20822	0.827661	0.277076	GT	0.749599	1.33405	0.410338	LT	0.671055	1.49019	0.266151	LT	0.895218	1.11705	0.661417	LT	273	274	275	611	616	620	828	834	840
100548_at	P	A	A	A	1260.08	882.315	1637.85	825.467	245.675	1405.26	1487.63	844.651	2130.62	737.533	458.934	1016.13	1.52651	0.655089	0.188629	GT	0.847039	1.18058	0.585572	LT	1.70851	0.585305	0.104909	GT	0.554886	1.80217	0.199464	LT	1.11923	0.893474	0.93868	GT	2.01704	0.495776	0.100054	GT	-675	-672	-669	-299	-297	-295	550	554	558
100550_f_at	P	P	P	P	23804.9	17851	29758.8	25075.3	13520.4	36630.2	23863.6	21367	26360.2	20037	18580.8	21493.3	0.949338	1.05337	0.901556	LT	0.99754	1.00247	0.835988	LT	1.18805	0.841719	0.519952	GT	1.05077	0.951679	0.973156	GT	1.25145	0.799076	0.559161	GT	1.19097	0.839648	0.0541903	GT	575	577	579	1555	1561	1568	-2870	-2858	-2847
100552_at	P	A	A	A	367.483	298.319	436.648	200.5	142.402	258.598	341.7	264.596	418.804	311.4	240.189	382.611	1.83283	0.545603	0.0102591	GT	1.07546	0.929838	0.700448	GT	1.1801	0.847385	0.355487	GT	0.586772	1.70424	0.0499702	LT	0.643866	1.55312	0.0871397	LT	1.0973	0.911326	0.590215	GT	1875	1881	1887	-532	-529	-527	449	451	453
100553_at	P	P	P	P	1895.55	1566.9	2224.2	1951.23	1376.5	2525.97	1660.43	1543.74	1777.13	1822.57	1234.81	2410.32	0.971462	1.02938	0.871459	LT	1.1416	0.875964	0.383868	GT	1.04004	0.961498	0.779245	GT	1.17514	0.850966	0.392037	GT	1.0706	0.934059	0.749724	GT	0.911041	1.09765	0.686045	LT	903	906	908	476	478	479	1691	1697	1703
100555_at	P	P	P	P	705.45	520.219	890.681	1206.03	891.8	1520.27	1307.5	1083.13	1531.87	1366.73	1193.38	1540.08	0.584934	1.70959	0.0509533	LT	0.539541	1.85343	0.0248273	LT	0.516158	1.93739	0.0173238	LT	0.922396	1.08413	0.605984	LT	0.88242	1.13325	0.409041	LT	0.956661	1.0453	0.681207	LT	-436	-435	-434	-351	-350	-348	1860	1867	1874
100557_g_at	P	P	P	P	5601.65	5027.52	6175.78	7049.13	4101.3	9996.97	6125.17	5367.03	6883.3	5381.8	5070.51	5693.09	0.794658	1.2584	0.256074	LT	0.91453	1.09346	0.342967	LT	1.04085	0.960753	0.702521	GT	1.15085	0.868925	0.660667	GT	1.30981	0.76347	0.332823	GT	1.13813	0.878637	0.139785	GT	-615	-614	-612	-4179	-4163	-4148	-1089	-1085	-1081
100559_at	P	P	P	P	1355.23	1149.94	1560.53	1146.43	983.275	1309.59	1116.37	965.682	1267.05	1089.87	801.757	1377.98	1.18213	0.845931	0.231785	GT	1.21397	0.823745	0.166089	GT	1.24349	0.804191	0.15743	GT	1.02693	0.973774	0.812797	GT	1.0519	0.950659	0.699474	GT	1.02431	0.976262	0.814888	GT	-1818	-1814	-1810	-828	-825	-823	1374	1378	1383
100560_at	P	P	P	P	957.783	681.333	1234.23	729.233	556.015	902.452	1322.87	842.701	1803.03	1237.5	1075.39	1399.61	1.31341	0.761376	0.388498	GT	0.724021	1.38118	0.239042	LT	0.773966	1.29205	0.231671	LT	0.551252	1.81405	0.0725486	LT	0.589279	1.69699	0.0196064	LT	1.06898	0.935468	0.882779	GT	725	727	730	1383	1390	1397	1140	1145	1151
100561_at	P	P	P	P	3342.18	2812.49	3871.87	1295.87	1049.18	1542.55	3279.7	2553.14	4006.26	2054.57	1368.85	2740.29	2.57911	0.387731	0.000186548	GT	1.01905	0.981305	0.909727	GT	1.62671	0.614738	0.0191893	GT	0.395117	2.53089	0.00360036	LT	0.630725	1.58548	0.0966135	LT	1.5963	0.62645	0.0873946	GT	3776	3786	3796	-869	-866	-863	1760	1766	1773
100562_at	P	P	P	P	3383.88	2800.65	3967.12	1689.67	1222.61	2156.72	1945.27	1787.5	2103.04	1957.73	1810.36	2105.11	2.00269	0.499328	0.00208685	GT	1.73955	0.574862	0.00278695	GT	1.72847	0.578546	0.00292378	GT	0.868604	1.15127	0.328644	LT	0.863073	1.15865	0.308863	LT	0.993632	1.00641	0.911939	LT	-2459	-2453	-2448	-636	-633	-631	1963	1969	1976
100564_at	P	P	P	P	1722.28	1300.89	2143.68	1355.37	1052.96	1657.77	1166.63	931.87	1401.4	835.567	742.809	928.324	1.27071	0.786959	0.290426	GT	1.47629	0.677376	0.0920647	GT	2.06122	0.485151	0.00584576	GT	1.16178	0.860751	0.41749	GT	1.62209	0.616488	0.0239887	GT	1.39622	0.71622	0.0563787	GT	-1385	-1381	-1377	-14056	-14001	-13946	-3474	-3461	-3448
100565_at	P	P	P	P	854.817	684.143	1025.49	898.8	459.899	1337.7	1641	1239.35	2042.65	774.667	690.431	858.902	0.951064	1.05145	0.976442	LT	0.520912	1.91971	0.00851179	LT	1.10346	0.906237	0.687997	GT	0.547715	1.82577	0.0960809	LT	1.16024	0.86189	0.795345	GT	2.11833	0.47207	0.00507462	GT	-1659	-1653	-1648	-782	-778	-775	895	899	904
100567_at	P	P	P	P	321.217	258.052	384.382	360.933	283.228	438.639	261.733	219.584	303.883	299.9	289.414	310.386	0.889961	1.12364	0.462688	LT	1.22727	0.814819	0.273498	GT	1.07108	0.933638	0.774741	GT	1.37901	0.725157	0.0944602	GT	1.20351	0.830901	0.217775	GT	0.872735	1.14582	0.17633	LT	-549	-547	-545	7676	7715	7755	-477	-474	-472
100568_at	P	P	P	P	5073.12	2883.37	7262.86	6952.3	2562.56	11342	5020.6	2886.56	7154.64	5740.1	3857.46	7622.74	0.729703	1.37042	0.543299	LT	1.01046	0.989648	0.837946	GT	0.883803	1.13147	0.573401	LT	1.38475	0.72215	0.677813	GT	1.21118	0.82564	0.895049	GT	0.874654	1.14331	0.63769	LT	-3069	-3049	-3029	255	258	260	-254	-251	-249
100569_at	P	P	P	P	26308	20459.1	32157	26665.2	15021.3	38309.2	25077.9	21098.8	29057.1	21402.8	17620.8	25184.8	0.986605	1.01358	0.957006	LT	1.04905	0.953242	0.858638	GT	1.22919	0.813544	0.264163	GT	1.06329	0.940473	0.948679	GT	1.24588	0.802647	0.513159	GT	1.17171	0.85345	0.265121	GT	90736	90957	91178	-987	-984	-980	-11347	-11309	-11270
100570_at	P	P	P	P	1975.28	1647.89	2302.68	3501.37	2215.05	4787.69	2116.37	1822.66	2410.07	2976.43	2774.04	3178.83	0.564146	1.77259	0.0126274	LT	0.933337	1.07142	0.538282	LT	0.663641	1.50684	0.0085978	LT	1.65442	0.60444	0.0729992	GT	1.17636	0.850078	0.526002	GT	0.711041	1.40639	0.0112868	LT	10772	10799	10825	812	815	818	733	735	738
100571_at	P	P	P	P	6963.67	6624.44	7302.89	6668.1	5174.27	8161.93	9975.13	9716.37	10233.9	5928.97	5305.19	6552.75	1.04433	0.957556	0.527516	GT	0.698103	1.43245	2.90552e-05	LT	1.17452	0.851414	0.0157988	GT	0.668472	1.49595	0.0211638	LT	1.12466	0.889154	0.435976	GT	1.68244	0.594375	0.000737536	GT	3588	3594	3600	21229	21278	21327	620	622	623
100572_at	P	P	P	P	947.783	738.184	1157.38	510.7	299.881	721.519	919.233	774.48	1063.99	1139.57	1020.86	1258.28	1.85585	0.538836	0.0305204	GT	1.03106	0.969877	0.994962	GT	0.831705	1.20235	0.292783	LT	0.555572	1.79995	0.0427933	LT	0.448153	2.23138	0.0143417	LT	0.806652	1.23969	0.0858987	LT	-1172	-1168	-1164	-604	-601	-598	652	655	658
100573_f_at	P	P	P	P	3143.7	2706.07	3581.33	2112.4	1742.41	2482.39	2416.67	2035.54	2797.8	2053.27	1783.22	2323.31	1.48821	0.671947	0.0149041	GT	1.30084	0.768733	0.0706705	GT	1.53107	0.653137	0.00925386	GT	0.874097	1.14404	0.315497	LT	1.0288	0.972007	0.830613	GT	1.17699	0.849628	0.204163	GT	-716	-714	-713	98663	98969	99275	2740	2748	2757
100574_f_at	P	P	P	P	30358.2	25393.4	35323	26976.2	25571.7	28380.7	25566.4	21910.2	29222.5	22667.8	16507.4	28828.1	1.12537	0.888597	0.424467	GT	1.18743	0.842157	0.250994	GT	1.33927	0.746677	0.0873125	GT	1.05514	0.947738	0.491528	GT	1.19007	0.840288	0.233195	GT	1.12787	0.886624	0.429737	GT	1055	1057	1059	1710	1714	1719	-2126	-2121	-2115
100575_at	P	P	P	P	2372.62	1682.19	3063.05	2283.97	1988.65	2579.28	1814.7	1525.14	2104.26	2153.43	1811.06	2495.81	1.03881	0.962636	0.936466	GT	1.30744	0.764852	0.42058	GT	1.10178	0.90762	0.873809	GT	1.25859	0.794539	0.0913775	GT	1.06062	0.942848	0.600896	GT	0.842701	1.18666	0.212917	LT	-220	-219	-219	-541	-538	-536	-1375	-1370	-1365
100576_at	P	P	P	P	2581.83	2025.05	3138.61	1541.93	1238.68	1845.19	1875.83	1594.41	2157.26	1370.27	1172.35	1568.18	1.67441	0.597224	0.0376778	GT	1.37637	0.726551	0.16451	GT	1.88418	0.530734	0.0145035	GT	0.821999	1.21655	0.181103	LT	1.12528	0.888668	0.414631	GT	1.36895	0.730484	0.042035	GT	-387	-386	-385	811	814	817	-652	-650	-647
100577_at	P	P	P	P	617.8	525.403	710.197	641.167	488.05	794.283	571.7	561.775	581.625	646.7	555.218	738.182	0.963556	1.03782	0.796458	LT	1.08064	0.92538	0.612752	GT	0.955312	1.04678	0.668311	LT	1.12151	0.891656	0.456526	GT	0.991444	1.00863	0.902091	LT	0.884027	1.13119	0.168581	LT	-1593	-1590	-1586	4545	4560	4575	-2716	-2707	-2699
100578_at	P	P	P	P	11149.7	8678.15	13621.2	11860.4	10994.2	12726.7	9064.23	8277.66	9850.81	9840.43	7604.87	12076	0.940074	1.06375	0.584321	LT	1.23007	0.812959	0.289713	GT	1.13305	0.882575	0.545265	GT	1.30849	0.764241	0.00988977	GT	1.20528	0.829686	0.16839	GT	0.921121	1.08563	0.585774	LT	-519	-518	-517	-1707	-1702	-1697	6159	6177	6195
100579_s_at	P	P	P	P	3256.67	2254.65	4258.69	6017.7	4815.92	7219.48	3511	2939.65	4082.35	3501.67	3322.57	3680.76	0.541181	1.84781	0.0221302	LT	0.927561	1.0781	0.591322	LT	0.930033	1.07523	0.57098	LT	1.71396	0.583446	0.0166935	GT	1.71852	0.581895	0.00853614	GT	1.00267	0.997342	0.969967	GT	-533	-532	-530	1131	1135	1140	-2129	-2121	-2114
100581_at	P	P	P	P	13275	10274.2	16275.8	16803.3	9909.86	23696.7	14122.8	12492.9	15752.7	9681.7	7433.73	11929.7	0.790027	1.26578	0.318776	LT	0.93997	1.06386	0.590336	LT	1.37115	0.729316	0.114285	GT	1.18979	0.840481	0.583006	GT	1.73557	0.57618	0.100538	GT	1.45871	0.685535	0.0434746	GT	-22815	-22748	-22681	895	898	902	-1016	-1012	-1008
100582_at	P	P	P	P	1067.48	817.264	1317.7	1073.77	840.704	1306.83	800.767	545.894	1055.64	792.7	623.904	961.496	0.994148	1.00589	0.870685	LT	1.33308	0.750144	0.252512	GT	1.34664	0.742588	0.231143	GT	1.34092	0.745755	0.179659	GT	1.35457	0.738242	0.112919	GT	1.01018	0.989926	0.985725	GT	-643	-640	-638	-493	-490	-487	216	217	219
100584_at	P	P	P	P	2787.87	2295.37	3280.36	2081.97	1449.48	2714.45	2680.6	2058.22	3302.98	3278.47	2872.49	3684.44	1.33905	0.746796	0.150444	GT	1.04002	0.961524	0.857398	GT	0.850357	1.17598	0.268415	LT	0.776679	1.28753	0.276903	LT	0.635043	1.5747	0.0587809	LT	0.817638	1.22303	0.197794	LT	-1526	-1522	-1518	-1420	-1414	-1409	1849	1856	1863
100587_f_at	P	P	P	P	307.983	244.461	371.505	399.133	243.493	554.774	387.733	346.37	429.097	284.967	253.163	316.77	0.77163	1.29596	0.28417	LT	0.794317	1.25894	0.1459	LT	1.08077	0.925267	0.74053	GT	1.0294	0.971438	0.956761	GT	1.40063	0.713964	0.260883	GT	1.36063	0.734955	0.0175681	GT	226	227	227	1815	1823	1830	378	379	381
100588_at	P	P	P	P	1491.7	1203.54	1779.86	2983.6	2422.54	3544.66	1735.07	1415.72	2054.42	3375.77	2634.08	4117.45	0.499966	2.00013	0.00200399	LT	0.859736	1.16315	0.29975	LT	0.441885	2.26303	0.00100461	LT	1.71959	0.581535	0.0138102	GT	0.883829	1.13144	0.45187	LT	0.513977	1.94561	0.00978721	LT	-334	-333	-332	-3274	-3260	-3246	-1501	-1495	-1488
100592_at	P	P	P	P	7067.6	5608.38	8526.82	10690.6	8366.75	13014.5	9078.4	8498.15	9658.65	8205.77	7703.8	8707.73	0.661102	1.51263	0.0536579	LT	0.778507	1.28451	0.14813	LT	0.861297	1.16104	0.332172	LT	1.17759	0.849192	0.265366	GT	1.30282	0.767566	0.097174	GT	1.10634	0.903878	0.0884223	GT	-588	-586	-585	2955	2964	2973	-776	-774	-771
100593_at	P	P	P	P	409.133	345.458	472.809	553.7	346.056	761.344	302.833	285.437	320.23	542.067	473.662	610.471	0.738908	1.35335	0.178517	LT	1.35102	0.740182	0.0470023	GT	0.754766	1.32491	0.0508716	LT	1.8284	0.546927	0.0623668	GT	1.02146	0.97899	0.940458	GT	0.558664	1.78998	0.00124409	LT	-411	-410	-409	980	983	987	-1368	-1363	-1358
100594_at	P	P	P	P	1735.87	1228.47	2243.26	1203.97	374.09	2033.84	1125	750.299	1499.7	1241.37	935.718	1547.01	1.44179	0.693582	0.214152	GT	1.54299	0.648091	0.146777	GT	1.39835	0.715128	0.256397	GT	1.07019	0.934411	0.96446	GT	0.969872	1.03106	0.732523	LT	0.906259	1.10344	0.620314	LT	-693	-690	-687	-809	-804	-799	467	470	473
100595_at	P	P	P	P	3885.45	2929.42	4841.48	2280.97	1760.03	2801.91	3925.97	3648.25	4203.69	3585.2	3208.39	3962.01	1.70342	0.587053	0.0916816	GT	0.98968	1.01043	0.794729	LT	1.08375	0.922725	0.911626	GT	0.580995	1.72119	0.0126985	LT	0.636217	1.57179	0.0268472	LT	1.09505	0.913202	0.230785	GT	-1233	-1229	-1225	575	578	581	2370	2382	2393
100596_at	P	A	A	A	669.717	509.252	830.181	77.9667	55.8473	100.086	538.767	475.121	602.412	56.4333	52.6255	60.2411	8.58978	0.116417	2.82248e-05	GT	1.24306	0.80447	0.40264	GT	11.8674	0.0842645	5.47e-06	GT	0.144713	6.91022	0.000322351	LT	1.38157	0.723814	0.135942	GT	9.54696	0.104745	5.7e-06	GT	-448	-445	-443	-155	-154	-152	-365	-362	-359
100597_at	P	P	P	P	601.517	505.855	697.179	359.9	166.388	553.412	565.867	460.971	670.762	557.833	502.271	613.395	1.67134	0.598321	0.0305073	GT	1.063	0.940733	0.723012	GT	1.07831	0.927378	0.660988	GT	0.636016	1.57229	0.13063	LT	0.645175	1.54997	0.12268	LT	1.0144	0.985803	0.9435	GT	-751	-749	-747	-474	-472	-471	-1578	-1573	-1567
100599_at	P	P	P	P	10976	8245.21	13706.7	24107.3	20540.5	27674	17241.4	16551.7	17931.2	20200	18894.5	21505.5	0.455296	2.19637	0.00567306	LT	0.636603	1.57084	0.0452759	LT	0.543364	1.84039	0.0152242	LT	1.39822	0.715197	0.0154939	GT	1.19343	0.837922	0.115192	GT	0.853536	1.1716	0.0158929	LT	755	758	760	-1324	-1319	-1313	1789	1796	1804
100600_at	P	P	A	P	124.717	97.8417	151.592	165.067	104.839	225.294	142.067	124.274	159.86	137.933	90.567	185.3	0.755553	1.32353	0.209621	LT	0.877874	1.13912	0.364721	LT	0.904181	1.10597	0.622503	LT	1.1619	0.860662	0.584177	GT	1.19671	0.835622	0.534655	GT	1.02997	0.970906	0.777562	GT	-509	-508	-506	432	434	436	4964	4984	5005
100601_at	P	A	A	A	2113.33	1713.95	2512.71	1315.8	1015.07	1616.53	1330.93	1080.09	1581.77	1275.1	1025.45	1524.75	1.60612	0.622618	0.0200224	GT	1.58786	0.629779	0.0186118	GT	1.65739	0.60336	0.0129317	GT	0.98863	1.0115	0.921447	LT	1.03192	0.969068	0.875731	GT	1.04379	0.958049	0.775802	GT	-689	-688	-686	694	697	699	-1129	-1125	-1121
100603_at	P	P	P	P	835.867	546.588	1125.15	549.2	321.54	776.86	763.833	380.768	1146.9	648.167	549.789	746.545	1.52197	0.657043	0.194289	GT	1.09431	0.913822	0.786403	GT	1.28959	0.775443	0.463039	GT	0.719005	1.39081	0.375789	LT	0.847313	1.1802	0.396565	LT	1.17845	0.848571	0.688056	GT	604	606	608	20446	20542	20638	-1041	-1036	-1031
100605_at	P	P	P	P	2660.65	1963.33	3357.97	920.4	397.236	1443.56	2064.87	1723.22	2406.51	1845.4	1213.12	2477.68	2.89075	0.345931	0.00540915	GT	1.28853	0.776076	0.322904	GT	1.44177	0.69359	0.161705	GT	0.445743	2.24344	0.0483368	LT	0.498754	2.005	0.0948963	LT	1.11893	0.893714	0.518718	GT	-591	-589	-586	8159	8212	8265	4317	4344	4372
100606_at	P	P	P	P	5052.62	4060.6	6044.63	4140.43	1924.45	6356.42	5660.7	3278.17	8043.23	3956.93	3144.86	4769.01	1.22031	0.819463	0.315885	GT	0.892578	1.12035	0.638435	LT	1.2769	0.783145	0.201908	GT	0.731435	1.36718	0.357582	LT	1.04637	0.955681	0.962812	GT	1.43058	0.699018	0.221098	GT	2609	2617	2625	-752	-748	-745	-1457	-1450	-1444
100607_at	P	A	A	A	893.317	626.536	1160.1	582.433	458.026	706.841	704.767	627.83	781.703	515.033	446.99	583.077	1.53377	0.65199	0.177318	GT	1.26754	0.788933	0.489768	GT	1.73448	0.576541	0.0834919	GT	0.82642	1.21004	0.194717	LT	1.13087	0.884279	0.443604	GT	1.36839	0.730786	0.0233571	GT	-420	-418	-416	772	777	782	1118	1126	1133
100608_at	P	P	P	P	2073.97	1961.35	2186.58	1411.53	1234.26	1588.81	1872.2	1770.14	1974.26	2161.47	1939.8	2383.13	1.4693	0.680596	0.000282452	GT	1.10777	0.902715	0.0587502	GT	0.959518	1.04219	0.471446	LT	0.753944	1.32636	0.0137679	LT	0.653044	1.53129	0.00620828	LT	0.866171	1.15451	0.0732368	LT	-4922	-4915	-4909	2342	2347	2351	696	697	698
100610_at	P	P	P	P	9099.33	6652.73	11545.9	8025.57	3192.91	12858.2	7699.57	6542.57	8856.57	6539.83	6220.25	6859.42	1.13379	0.881995	0.546553	GT	1.1818	0.846168	0.532472	GT	1.39137	0.718716	0.176837	GT	1.04234	0.95938	0.895106	GT	1.22718	0.814875	0.716253	GT	1.17733	0.849377	0.114029	GT	-450	-449	-447	-889	-885	-880	-1376	-1369	-1363
100612_at	P	P	P	P	6916.95	4939.9	8894	4043.73	2171.28	5916.19	5780.03	4863.3	6696.76	6106.57	5338.86	6874.28	1.71054	0.584612	0.0908938	GT	1.1967	0.835633	0.602955	GT	1.13271	0.882841	0.770619	GT	0.699604	1.42938	0.162909	LT	0.662194	1.51013	0.115366	LT	0.946528	1.05649	0.619316	LT	-645	-643	-641	-1750	-1741	-1733	441	443	446
100613_at	P	P	P	P	3997.18	2812.42	5181.94	3763.13	1958.19	5568.08	3564.9	3052.64	4077.16	3464.1	2873.76	4054.44	1.0622	0.941446	0.89075	GT	1.12126	0.891853	0.865627	GT	1.15389	0.866635	0.781859	GT	1.05561	0.947322	0.987735	GT	1.08632	0.920536	0.894607	GT	1.0291	0.971724	0.806681	GT	-355	-354	-353	-2436	-2426	-2415	-713	-710	-707
100616_at	P	P	P	P	1813.32	1477.05	2149.59	981.2	673.252	1289.15	1403.93	1066.5	1741.36	1691.6	1480.32	1902.88	1.84806	0.541108	0.00803206	GT	1.2916	0.774235	0.158141	GT	1.07195	0.932876	0.723896	GT	0.698894	1.43083	0.138721	LT	0.580043	1.72401	0.0273629	LT	0.829944	1.2049	0.232998	LT	646	647	649	1013	1016	1020	-2261	-2254	-2246
100618_f_at	P	P	P	P	2385.33	2205.86	2564.81	2239.97	2052.75	2427.18	2242.8	1933.45	2552.15	2801.47	1988.1	3614.83	1.0649	0.939058	0.357518	GT	1.06355	0.940246	0.408042	GT	0.851459	1.17446	0.272461	LT	0.998737	1.00126	0.984201	LT	0.799569	1.25067	0.28865	LT	0.800581	1.24909	0.30638	LT	-611	-610	-609	-845	-843	-841	-346	-345	-344
100621_at	P	P	P	P	4241.33	1849.66	6633.01	5641.87	4586.8	6696.94	4738.13	4205.51	5270.76	3049.67	2473.35	3625.98	0.751761	1.33021	0.289189	LT	0.895149	1.11713	0.483559	LT	1.39075	0.719035	0.729247	GT	1.19074	0.839817	0.205893	GT	1.84999	0.540542	0.0116925	GT	1.55366	0.643643	0.0185555	GT	-293	-292	-290	-701	-697	-692	-945	-939	-933
100622_at	P	P	P	P	4699.18	4131.98	5266.39	5583.03	3966.8	7199.27	5329.87	4525.25	6134.49	4897.6	3990.87	5804.33	0.84169	1.18809	0.295907	LT	0.88167	1.13421	0.248159	LT	0.959487	1.04222	0.70797	LT	1.0475	0.954654	0.884556	GT	1.13995	0.877229	0.568819	GT	1.08826	0.918897	0.499088	GT	-1197	-1194	-1192	-961	-958	-956	1415	1418	1422
100626_at	P	P	P	A	189.75	106.251	273.249	164.467	57.126	271.807	211.967	159.794	264.14	186.733	137.668	235.799	1.15373	0.866755	0.827378	GT	0.895188	1.11708	0.551662	LT	1.01615	0.984102	0.748379	GT	0.775908	1.28881	0.427153	LT	0.880757	1.13539	0.584472	LT	1.13513	0.880956	0.535992	GT	-178	-177	-176	-213	-211	-210	-655	-650	-644
100628_at	P	P	P	P	5996.38	5317.62	6675.14	5524.33	4447.73	6600.94	4096.27	2833.55	5358.98	3550.6	2656.85	4444.35	1.08545	0.921278	0.465803	GT	1.46387	0.683123	0.0225484	GT	1.68884	0.592124	0.003204	GT	1.34863	0.741495	0.175662	GT	1.55589	0.64272	0.0535159	GT	1.15368	0.866789	0.556046	GT	655	657	659	640	643	646	1514	1521	1528
100632_at	P	P	A	A	625.6	391.717	859.483	616.6	505.392	727.808	480.333	384.376	576.291	560.233	476.827	643.64	1.0146	0.985614	0.792411	GT	1.30243	0.767796	0.659929	GT	1.11668	0.895514	0.997678	GT	1.28369	0.779003	0.156841	GT	1.10061	0.908585	0.493597	GT	0.857381	1.16634	0.2968	LT	-273	-272	-270	-536	-532	-529	-395	-392	-389
100633_at	P	P	P	P	4363	3681.12	5044.88	3190.27	2215	4165.53	3836.47	3143.13	4529.8	3611.13	3278.94	3943.32	1.3676	0.731209	0.0701804	GT	1.13724	0.879319	0.376163	GT	1.20821	0.827672	0.178056	GT	0.831564	1.20255	0.325184	LT	0.883453	1.13192	0.409981	LT	1.0624	0.941265	0.634203	GT	-1013	-1011	-1009	-3056	-3048	-3039	961	964	966
100635_at	P	P	P	P	3988.33	3537.81	4438.86	3134.7	2418.53	3850.87	3204.97	3124.42	3285.51	3770.57	3391.06	4150.07	1.27232	0.785967	0.0643016	GT	1.24442	0.803585	0.0429217	GT	1.05775	0.945399	0.598415	GT	0.978076	1.02242	0.771501	LT	0.83136	1.20285	0.188579	LT	0.849996	1.17648	0.0419167	LT	-927	-926	-924	1462	1465	1469	1670	1674	1678
100636_at	P	P	P	P	2509.83	2211.59	2808.07	4855	3706.73	6003.27	4924.27	4414.58	5433.96	3400.97	3041.97	3759.96	0.516958	1.93439	0.000767817	LT	0.509687	1.96199	0.000159721	LT	0.737976	1.35506	0.0128606	LT	0.985934	1.01427	0.852044	LT	1.42754	0.700508	0.0558211	GT	1.4479	0.690654	0.0077273	GT	-37958	-37879	-37800	-2633	-2626	-2618	553	555	556
100680_at	P	P	P	P	116.183	102.974	129.393	472.533	187.632	757.435	207.833	104.582	311.085	390.867	294.053	487.681	0.245873	4.06714	0.00102706	LT	0.559022	1.78884	0.021641	LT	0.297245	3.36422	1.7794e-05	LT	2.27362	0.439828	0.140857	GT	1.20894	0.827173	0.80851	GT	0.531724	1.88067	0.0665217	LT	114	115	116	-11214	-11121	-11028	249	251	253
100684_at	P	P	P	P	4613.27	3552.58	5673.95	4430.73	3419.47	5441.99	4156.7	3168.11	5145.29	3352.47	3305.99	3398.95	1.0412	0.960433	0.946742	GT	1.10984	0.901032	0.716372	GT	1.37608	0.726701	0.194077	GT	1.06593	0.938152	0.731112	GT	1.32163	0.756639	0.0953243	GT	1.23989	0.806521	0.203827	GT	-1197	-1193	-1190	-455	-453	-452	10351	10389	10427
100686_at	P	P	P	P	42525.9	34817.4	50234.4	56717.6	32062.2	81373	36769.6	32230.3	41308.9	32322.3	26102.2	38542.4	0.749784	1.33372	0.224949	LT	1.15655	0.86464	0.439987	GT	1.31568	0.760062	0.150688	GT	1.54251	0.648293	0.1449	GT	1.75475	0.569882	0.0838449	GT	1.13759	0.87905	0.318027	GT	705	707	709	1273	1277	1282	4334	4350	4365
100693_at	P	A	A	P	117.533	97.8357	137.231	134.3	71.4677	197.132	169.533	70.3516	268.715	142.133	90.2484	194.018	0.875155	1.14265	0.697838	LT	0.693276	1.44243	0.216197	LT	0.826923	1.2093	0.373174	LT	0.792175	1.26235	0.602081	LT	0.944887	1.05833	0.807168	LT	1.19278	0.83838	0.718103	GT	5691	5713	5736	-269	-267	-266	2224	2236	2249
100694_at	P	P	P	P	39534.6	32999.2	46069.9	54639.5	34019.6	75259.4	37638.9	33676	41601.7	31518.9	27458.1	35579.6	0.723553	1.38207	0.129448	LT	1.05037	0.95205	0.805203	GT	1.25431	0.797249	0.156831	GT	1.45168	0.688859	0.162192	GT	1.73355	0.576852	0.0623941	GT	1.19417	0.837402	0.108162	GT	1590	1593	1597	1027	1031	1034	-1496	-1491	-1486
100696_at	P	A	P	P	198.333	140.538	256.128	154.133	151.268	156.999	219.967	140.703	299.23	281.4	198.319	364.481	1.28676	0.777143	0.568387	GT	0.901652	1.10908	0.664578	LT	0.704809	1.41882	0.222684	LT	0.700712	1.42712	0.201457	LT	0.547738	1.82569	0.0186582	LT	0.781687	1.27928	0.362127	LT	-3538	-3524	-3509	-682	-678	-674	-342	-340	-338
100701_r_at	P	A	P	A	165.783	134.153	197.414	190.433	113.722	267.144	180.433	165.827	195.04	238.733	162.706	314.761	0.870558	1.14869	0.598321	LT	0.918807	1.08837	0.521957	LT	0.694429	1.44003	0.101456	LT	1.05542	0.947488	0.969955	GT	0.797682	1.25363	0.420775	LT	0.755794	1.32311	0.203403	LT	854	858	861	-1035	-1029	-1024	955	960	965
100702_at	P	A	P	P	211.967	175.321	248.612	246.867	163.1	330.633	241.933	135.005	348.862	292.333	207.224	377.443	0.858628	1.16465	0.471008	LT	0.876137	1.14137	0.617915	LT	0.725086	1.37915	0.0975311	LT	1.02039	0.980016	0.905934	GT	0.84447	1.18417	0.488864	LT	0.827594	1.20832	0.457959	LT	-593	-591	-589	-1206	-1200	-1194	-352	-351	-349
100706_f_at	P	P	P	P	2073.47	1326.32	2820.61	633.833	348.008	919.659	2374.67	2147.87	2601.46	1676.87	1136.22	2217.52	3.27131	0.305688	0.0186195	GT	0.873161	1.14526	0.490147	LT	1.23651	0.808726	0.73407	GT	0.266915	3.74652	0.00376478	LT	0.377987	2.6456	0.0228205	LT	1.41613	0.706148	0.0992378	GT	485	487	489	-2923	-2905	-2887	497	500	503
100708_at	P	P	P	P	13334	10558.7	16109.4	15341	12352.9	18329.2	14896.4	14027.2	15765.6	16948.7	15957.9	17939.5	0.869173	1.15052	0.37986	LT	0.895115	1.11718	0.401997	LT	0.78673	1.27108	0.127362	LT	1.02985	0.971019	0.866166	GT	0.905147	1.10479	0.373794	LT	0.878915	1.13777	0.038508	LT	1653	1656	1659	1200	1203	1207	7974	7995	8016
100710_at	P	P	P	P	9397	8142.61	10651.4	6351.9	5443.97	7259.83	8092.17	6965.46	9218.87	7928.1	7035.52	8820.68	1.4794	0.67595	0.00885054	GT	1.16125	0.861144	0.218872	GT	1.18528	0.843684	0.158836	GT	0.784944	1.27398	0.0756046	LT	0.801188	1.24815	0.0748863	LT	1.02069	0.979725	0.844292	GT	-3187	-3183	-3178	45978	46077	46175	720	722	723
100711_at	P	P	P	P	23360.5	19417.6	27303.3	30116.1	22602.6	37629.6	22802.1	19861.7	25742.6	17978.3	15935.3	20021.3	0.77568	1.28919	0.119038	LT	1.02449	0.976099	0.93329	GT	1.29937	0.769604	0.0894542	GT	1.32076	0.757141	0.125478	GT	1.67514	0.596966	0.0201163	GT	1.26831	0.788448	0.0521143	GT	-1352	-1349	-1347	7617	7636	7654	-10791	-10765	-10739
100713_at	P	P	P	P	153.417	113.738	193.096	235.9	101.704	370.096	247.133	200.868	293.399	269.933	186.068	353.799	0.650346	1.53764	0.295131	LT	0.620785	1.61086	0.0528834	LT	0.56835	1.75948	0.0449788	LT	0.954545	1.04762	0.706787	LT	0.873919	1.14427	0.611301	LT	0.915535	1.09226	0.741833	LT	471	473	476	135	136	137	395	398	401
100716_at	A	P	P	A	210.65	157.371	263.929	2117.43	751.416	3483.45	548.9	225.187	872.613	355.267	278.504	432.029	0.0994837	10.0519	0.00016245	LT	0.383768	2.60574	0.0231325	LT	0.592935	1.68653	0.0299475	LT	3.85759	0.259229	0.059832	GT	5.96012	0.167782	0.0118891	GT	1.54504	0.647234	0.43598	GT	-951	-945	-940	-738	-733	-727	-322	-319	-317
100717_at	P	P	P	P	694.817	648.205	741.429	1211.13	952.316	1469.95	733.7	600.52	866.88	1051.97	887.987	1215.95	0.573691	1.7431	0.000566698	LT	0.947004	1.05596	0.558632	LT	0.660493	1.51402	0.000829824	LT	1.65072	0.605796	0.0289834	GT	1.1513	0.86858	0.39695	GT	0.697456	1.43378	0.0426981	LT	-704	-702	-701	395	396	398	-382	-381	-380
100718_at	P	P	P	P	18714.5	12937.2	24491.8	16149.1	9549.02	22749.2	12719.3	8326.53	17112.1	14669.3	13930.6	15407.9	1.15886	0.862919	0.595709	GT	1.47135	0.679648	0.171876	GT	1.27576	0.783844	0.397964	GT	1.26966	0.787615	0.507195	GT	1.10088	0.908362	0.867328	GT	0.867071	1.15331	0.371409	LT	1687	1693	1699	769	772	776	6643	6676	6709
100720_at	P	P	P	P	38507.4	30960.4	46054.4	40149	32788.6	47509.5	34358.2	31434.3	37282.1	30203.7	25682.8	34724.6	0.959112	1.04263	0.720723	LT	1.12076	0.892248	0.551009	GT	1.27492	0.784361	0.182966	GT	1.16854	0.855766	0.209302	GT	1.32928	0.75229	0.0745368	GT	1.13755	0.879084	0.203358	GT	603	604	605	1372	1375	1379	-3826	-3815	-3805
100727_at	P	P	P	P	27447.8	22090.9	32804.7	33448.6	24822.7	42074.5	23449.1	19382.8	27515.3	19752.8	17317.2	22188.4	0.820596	1.21863	0.260212	LT	1.17053	0.854315	0.361977	GT	1.38956	0.719651	0.0636344	GT	1.42644	0.701048	0.110241	GT	1.69336	0.590543	0.0309883	GT	1.18712	0.842372	0.202203	GT	5392	5404	5416	-1906	-1900	-1894	-2623	-2615	-2607
100729_at	P	P	P	P	46917.6	36956.3	56878.9	57298.3	35104.3	79492.3	41728.2	36031.9	47424.5	33591.2	30397.3	36785.2	0.818831	1.22125	0.368077	LT	1.12436	0.889394	0.600824	GT	1.39672	0.715962	0.105278	GT	1.37313	0.728263	0.22035	GT	1.70575	0.586252	0.0585052	GT	1.24224	0.805	0.0654783	GT	576	577	579	2120	2127	2135	2282	2290	2298
100732_at	P	P	P	P	34361.1	30329.5	38392.7	38088.7	30902.1	45275.3	33218.9	29789.3	36648.5	27044.6	22639.8	31449.5	0.902135	1.10848	0.376687	LT	1.03438	0.966759	0.787785	GT	1.27053	0.78707	0.0605971	GT	1.1466	0.872147	0.289555	GT	1.40836	0.710044	0.05354	GT	1.2283	0.814133	0.0999175	GT	5231	5240	5249	-2379	-2373	-2368	-2354	-2349	-2343
100733_at	P	P	P	P	12522.7	11433.9	13611.5	12540	11059.8	14020.3	11811.7	10200	13423.3	11950.7	10769.7	13131.7	0.998615	1.00139	0.971663	LT	1.06019	0.943223	0.48123	GT	1.04786	0.954328	0.560669	GT	1.06167	0.941917	0.533198	GT	1.04931	0.953007	0.577627	GT	0.988363	1.01177	0.879282	LT	1771	1774	1776	5343	5353	5363	2500	2504	2509
100734_at	P	P	P	P	25900.4	23671.7	28129.1	30513.4	23879	37147.8	26512.6	24186.9	28838.2	23612.5	20979.2	26245.7	0.84882	1.17811	0.148697	LT	0.976911	1.02363	0.716849	LT	1.0969	0.911664	0.253489	GT	1.1509	0.868882	0.338443	GT	1.29226	0.773838	0.119965	GT	1.12282	0.890614	0.180739	GT	-3666	-3661	-3656	-8472	-8457	-8441	-2076	-2072	-2068
100743_at	P	P	P	P	1172.47	1078	1266.94	834.933	739.166	930.701	1171.3	796.554	1546.05	1064.63	927.138	1202.13	1.40426	0.712117	0.00185992	GT	1.001	0.999005	0.856962	GT	1.10129	0.908029	0.224172	GT	0.712826	1.40287	0.129877	LT	0.784245	1.27511	0.0485116	LT	1.10019	0.908933	0.682053	GT	-860	-859	-858	-565	-564	-563	5334	5345	5357
100749_at	P	P	P	P	211.9	171.983	251.817	205.867	161.016	250.717	301.533	262.109	340.957	259.133	200.941	317.325	1.02931	0.971527	0.885375	GT	0.702742	1.423	0.0286586	LT	0.817726	1.2229	0.210897	LT	0.682733	1.4647	0.0451422	LT	0.794443	1.25874	0.250417	LT	1.16362	0.859385	0.309599	GT	344	345	345	-2454	-2445	-2436	754	757	759
100751_at	P	A	P	P	381.4	241.195	521.605	190.867	137.386	244.348	257.933	213.386	302.481	404.633	375.591	433.676	1.99825	0.500437	0.124263	GT	1.47868	0.67628	0.42195	GT	0.942582	1.06092	0.624377	LT	0.739984	1.35138	0.132947	LT	0.471703	2.11998	0.00578253	LT	0.63745	1.56875	0.00996993	LT	2813	2826	2839	-3010	-2991	-2972	-282	-281	-279
100753_at	P	P	P	P	15915.5	13022.9	18808.2	13861	11847.4	15874.6	15237.7	13171.2	17304.2	12775.6	11277.4	14273.8	1.14823	0.870909	0.412627	GT	1.04449	0.957407	0.849925	GT	1.24577	0.802714	0.185712	GT	0.909654	1.09932	0.400003	LT	1.08496	0.921696	0.461759	GT	1.19271	0.838425	0.12489	GT	23442	23476	23510	-1039	-1036	-1034	9386	9405	9425
100757_at	A	P	P	A	156.05	130.575	181.525	211.233	150.999	271.467	250.933	210.386	291.48	238.667	140.786	336.547	0.738757	1.35363	0.0860268	LT	0.621878	1.60803	0.0064882	LT	0.653841	1.52942	0.0609731	LT	0.841791	1.18794	0.322118	LT	0.885056	1.12987	0.713786	LT	1.0514	0.951116	0.716072	GT	-20468	-20366	-20263	138	139	140	-1562	-1551	-1540
100758_at	P	P	P	P	34451.3	28235.9	40666.8	44279.5	29754.6	58804.3	33742.6	30495.4	36989.8	25604.9	23666.9	27543	0.778043	1.28528	0.197521	LT	1.021	0.979428	0.982216	GT	1.3455	0.74322	0.0735333	GT	1.31227	0.762037	0.235349	GT	1.72933	0.578257	0.0397154	GT	1.31782	0.758831	0.0121429	GT	1656	1660	1663	1498	1502	1506	-2915	-2907	-2899
100772_g_at	A	A	P	P	59.1333	38.7649	79.5018	297.367	-89.3679	684.101	129.1	103.178	155.022	97.8667	56.0023	139.731	0.198857	5.02875	0.0679221	LT	0.458043	2.1832	0.0535267	LT	0.604223	1.65502	0.188301	LT	2.30338	0.434144	0.620775	GT	3.03849	0.329111	0.394637	GT	1.31914	0.758069	0.247928	GT	-233	-232	-230	-954	-945	-936	-478	-473	-468
100775_at	P	P	P	P	219.017	188.641	249.393	224.867	113.57	336.163	215.033	203.193	226.874	235.8	104.552	367.048	0.973985	1.02671	0.914272	LT	1.01852	0.981813	0.952592	GT	0.928824	1.07663	0.992119	LT	1.04573	0.95627	0.954956	GT	0.953633	1.04862	0.953934	LT	0.911931	1.09657	0.977711	LT	560	562	564	1045	1051	1058	680	684	688
100780_at	P	P	P	P	36639.4	30071.6	43207.3	39879.7	30120.3	49639.1	34286.4	30064.8	38508.1	27721.6	25833.3	29609.9	0.918749	1.08844	0.572377	LT	1.06863	0.935779	0.727201	GT	1.32169	0.756606	0.0924128	GT	1.16313	0.859747	0.354857	GT	1.43858	0.695131	0.047796	GT	1.23681	0.808531	0.0425775	GT	978	980	982	3370	3379	3388	5916	5932	5947
100877_at	P	P	P	P	5381.4	4073.99	6688.81	6607.03	4696.57	8517.5	5116.27	3848.85	6383.68	3823	3139.16	4506.84	0.814496	1.22775	0.313242	LT	1.05182	0.950732	0.88761	GT	1.40764	0.71041	0.140371	GT	1.29138	0.774367	0.267408	GT	1.72823	0.578626	0.0371045	GT	1.33829	0.747225	0.13933	GT	-1224	-1221	-1218	-673	-671	-669	2451	2459	2467
100878_at	P	P	P	P	3167.85	1378.62	4957.08	1838.33	675.206	3001.46	2993.07	2786.12	3200.01	2371.6	1907	2836.2	1.72322	0.580309	0.590464	GT	1.0584	0.944826	0.687394	GT	1.33574	0.748647	0.983409	GT	0.614197	1.62814	0.195479	LT	0.775145	1.29008	0.404094	LT	1.26205	0.792365	0.0798691	GT	186	187	189	219	222	224	-6700	-6621	-6542
100879_at	P	A	A	A	414.383	351.611	477.155	182.367	116.161	248.573	243.233	222.652	263.815	210.033	190.796	229.27	2.27225	0.440092	0.00194465	GT	1.70365	0.586977	0.0042323	GT	1.97294	0.506858	0.00110657	GT	0.74976	1.33376	0.176586	LT	0.868275	1.15171	0.42577	LT	1.15807	0.863506	0.0802532	GT	-436	-434	-432	-257	-255	-254	2599	2613	2628
100880_at	A	A	A	P	182.233	140.482	223.985	289.1	103.346	474.854	158.333	108.939	207.728	411.3	236.417	586.183	0.630347	1.58643	0.233067	LT	1.15095	0.868849	0.535901	GT	0.443067	2.257	0.0132782	LT	1.82589	0.547677	0.264243	GT	0.702893	1.42269	0.397292	LT	0.384958	2.59768	0.0401035	LT	-175	-174	-174	576	580	584	-172	-170	-169
100884_at	P	P	P	P	5794.25	4903.6	6684.9	3333.67	2556.43	4110.91	4147.7	3480.27	4815.13	3429.97	2820.68	4039.26	1.7381	0.57534	0.00531213	GT	1.39698	0.71583	0.035083	GT	1.6893	0.59196	0.00476573	GT	0.803739	1.24419	0.194075	LT	0.971924	1.02889	0.825484	LT	1.20925	0.826956	0.180537	GT	12383	12411	12439	4346	4360	4374	-602	-600	-599
100885_at	P	P	P	P	4412.75	3888.92	4936.58	3368.2	2531.06	4205.34	3490.77	2762.38	4219.16	4527.17	4088.06	4966.27	1.31012	0.763288	0.054608	GT	1.26412	0.791064	0.0795374	GT	0.974727	1.02593	0.741755	LT	0.964888	1.03639	0.826559	LT	0.743997	1.34409	0.0783854	LT	0.771071	1.2969	0.0923654	LT	360	361	362	-934	-931	-928	1375	1380	1384
100886_f_at	P	P	P	P	1608.1	1274.35	1941.85	1161.77	899.858	1423.68	1413.37	1327.46	1499.28	1035.23	964.026	1106.44	1.38419	0.722447	0.12279	GT	1.13778	0.878905	0.552788	GT	1.55337	0.643762	0.0383071	GT	0.821985	1.21657	0.142743	LT	1.12223	0.891085	0.417126	GT	1.36526	0.732459	0.00254061	GT	1774	1777	1780	-1877	-1872	-1867	-493	-491	-490
100887_at	P	P	P	P	432.133	168.932	695.335	221.167	164.007	278.326	367.767	196.982	538.551	530.767	264.757	796.776	1.95388	0.511802	0.474498	GT	1.17502	0.851049	0.916113	GT	0.814168	1.22825	0.478857	LT	0.601378	1.66285	0.206161	LT	0.416693	2.39985	0.0661084	LT	0.692897	1.44322	0.421994	LT	-270	-268	-266	335	339	342	-348	-345	-341
100889_at	P	P	P	P	2034.42	1345.55	2723.28	1922.63	1400.78	2444.48	3024.8	1469.24	4580.36	2318.37	1275.12	3361.61	1.05814	0.945054	0.994179	GT	0.672579	1.48681	0.282578	LT	0.877522	1.13957	0.615974	LT	0.635623	1.57326	0.322317	LT	0.829305	1.20583	0.584668	LT	1.30471	0.766453	0.582098	GT	-364	-363	-361	695	699	704	-1590	-1580	-1570
100890_at	P	P	P	P	852.433	659.64	1045.23	502.3	457.931	546.669	469.4	363.127	575.673	624.2	540.802	707.598	1.69706	0.589254	0.0130041	GT	1.81601	0.550659	0.00994909	GT	1.36564	0.732257	0.106199	GT	1.07009	0.934501	0.548173	GT	0.80471	1.24268	0.0549119	LT	0.752003	1.32978	0.0855588	LT	-1309	-1306	-1302	-472	-470	-468	-746	-743	-740
100892_at	P	P	P	P	1004.9	895.078	1114.72	556.1	400.587	711.613	523.233	406.241	640.225	659	487.112	830.888	1.80705	0.553388	0.00231462	GT	1.92056	0.520682	0.000521302	GT	1.52489	0.655787	0.00786514	GT	1.06281	0.940898	0.803045	GT	0.843854	1.18504	0.431439	LT	0.793981	1.25948	0.251111	LT	1259	1262	1266	-1941	-1934	-1927	1522	1527	1533
100893_at	P	P	P	P	1488.87	1392.87	1584.86	1671.67	1447.31	1896.03	1397	1062.2	1731.8	1735	1417.37	2052.63	0.890648	1.12278	0.125501	LT	1.06576	0.938298	0.434667	GT	0.858136	1.16532	0.106788	LT	1.19661	0.835693	0.233698	GT	0.963497	1.03789	0.793693	LT	0.805187	1.24195	0.216269	LT	1820	1823	1826	-2782	-2775	-2768	1967	1972	1977
100894_at	P	P	P	P	1983.88	1533.47	2434.3	1488	1370.77	1605.23	2204.6	1742.96	2666.24	2700.8	2559.75	2841.85	1.33325	0.750044	0.201001	GT	0.899884	1.11125	0.515648	LT	0.734554	1.36137	0.0959443	LT	0.674952	1.48159	0.0256817	LT	0.550948	1.81505	0.000239255	LT	0.816277	1.22507	0.115929	LT	313	314	315	-879	-876	-873	605	607	609
100895_at	P	P	P	P	436.783	338.025	535.541	610.867	576.092	645.641	434.933	401.025	468.842	594.767	499.47	690.063	0.715022	1.39856	0.0678167	LT	1.00425	0.995764	0.877132	GT	0.734378	1.3617	0.102234	LT	1.40451	0.711994	0.0023116	GT	1.02707	0.973644	0.732518	GT	0.731267	1.36749	0.0302757	LT	-4222	-4211	-4201	-1369	-1364	-1359	2213	2221	2228
100897_f_at	P	P	P	P	419.25	364.637	473.863	479.7	380.866	578.534	514.6	486.978	542.222	385.067	288.378	481.756	0.873984	1.14419	0.291135	LT	0.81471	1.22743	0.0636292	LT	1.08877	0.918466	0.496339	GT	0.93218	1.07275	0.497459	LT	1.24576	0.802724	0.234934	GT	1.33639	0.748283	0.0712325	GT	-2422	-2417	-2412	426	428	429	441	443	444
100899_s_at	P	P	P	P	2157.03	1652.88	2661.18	1905.87	1564.82	2246.92	2005.37	1744.98	2265.76	1736.57	1319.79	2153.35	1.13179	0.883559	0.543877	GT	1.07563	0.929687	0.766676	GT	1.24213	0.805072	0.275834	GT	0.950383	1.05221	0.650936	LT	1.09749	0.911169	0.553519	GT	1.15479	0.86596	0.347315	GT	454	455	456	1891	1898	1905	566	568	570
100900_at	P	P	P	P	3220.37	2687.2	3753.53	1840.1	1518.7	2161.5	2843.67	2611.45	3075.88	2889.37	2449.31	3329.43	1.7501	0.571395	0.00776954	GT	1.13247	0.883026	0.47448	GT	1.11456	0.897217	0.540868	GT	0.647087	1.54539	0.00998129	LT	0.636852	1.57022	0.0177637	LT	0.984183	1.01607	0.903234	LT	774	776	778	-2210	-2202	-2195	477	479	481
100901_at	P	A	P	A	305.333	158.64	452.027	187.067	108.341	265.792	325.367	177.978	472.755	415.933	279.762	552.104	1.63222	0.612664	0.514287	GT	0.938428	1.06561	0.696895	LT	0.734092	1.36223	0.34206	LT	0.574941	1.73931	0.216577	LT	0.449752	2.22345	0.0503993	LT	0.782257	1.27835	0.422891	LT	-317	-315	-313	-2578	-2552	-2527	-603	-597	-591
100902_at	P	P	P	P	629.4	565.612	693.188	670.3	571.796	768.804	1063.23	658.739	1467.73	723.733	642.32	805.147	0.938983	1.06498	0.497798	LT	0.591968	1.68928	0.0196893	LT	0.869657	1.14988	0.126853	LT	0.630435	1.58621	0.143124	LT	0.92617	1.07972	0.449366	LT	1.4691	0.680691	0.204359	GT	586	587	588	-671	-669	-667	-1631	-1626	-1621
100903_at	P	P	P	P	2629.48	1812.41	3446.55	2197.13	1422.95	2971.31	2475.07	2059.12	2891.02	2180.87	1360.39	3001.34	1.19678	0.835576	0.568756	GT	1.06239	0.941275	0.975582	GT	1.20571	0.82939	0.546613	GT	0.887707	1.1265	0.535569	LT	1.00746	0.992596	0.972845	GT	1.1349	0.881135	0.518002	GT	964	967	971	946	951	956	-372	-370	-368
100904_at	P	A	A	A	1070.92	953.184	1188.65	1147.87	599.575	1696.16	859.133	769.502	948.764	823.033	640.457	1005.61	0.932963	1.07185	0.92097	LT	1.24651	0.802241	0.0470471	GT	1.30118	0.768532	0.0482187	GT	1.33608	0.748461	0.39936	GT	1.39468	0.717011	0.345812	GT	1.04386	0.957981	0.699918	GT	398	399	400	382	384	385	393	395	396
100905_at	P	P	P	P	532.15	334.695	729.605	843.167	234.672	1451.66	884	738.322	1029.68	756.033	592.928	919.139	0.631133	1.58445	0.51563	LT	0.60198	1.66119	0.160278	LT	0.703871	1.42071	0.279971	LT	0.953808	1.04843	0.645137	LT	1.11525	0.896659	0.848523	GT	1.16926	0.855241	0.302327	GT	343	345	347	322	324	327	485	489	493
100906_at	P	P	P	P	1349.6	867.633	1831.57	2566.1	2267.75	2864.45	2097	1512.82	2681.18	1075.57	867.758	1283.38	0.525934	1.90138	0.0374533	LT	0.643586	1.55379	0.128422	LT	1.25478	0.796952	0.622334	GT	1.2237	0.817193	0.225737	GT	2.38581	0.419144	0.0017521	GT	1.94967	0.512907	0.0186859	GT	-416	-414	-413	-1961	-1951	-1941	-2362	-2350	-2337
100908_at	P	P	P	P	1399.25	1094.29	1704.21	595.367	560.417	630.316	1064.57	847.984	1281.15	813.867	748.96	878.774	2.35023	0.42549	0.000738762	GT	1.31438	0.760812	0.151834	GT	1.71926	0.581645	0.00965911	GT	0.559257	1.78809	0.00706172	LT	0.731529	1.367	0.00352492	LT	1.30804	0.764505	0.0889654	GT	5364	5376	5388	-780	-777	-775	374	375	376
100910_at	P	P	P	P	2835.6	2056.64	3614.56	6609.57	6152.83	7066.31	5107.57	4811.99	5403.14	3684.1	3149.01	4219.19	0.429015	2.33092	0.00310742	LT	0.555176	1.80123	0.0162137	LT	0.769686	1.29923	0.184476	LT	1.29407	0.772754	0.0052211	GT	1.79408	0.557389	0.00194683	GT	1.38638	0.721302	0.0137325	GT	388	389	390	3423	3438	3452	4258	4275	4293
100911_at	P	P	P	P	1747.23	1198.78	2295.68	1799.53	898.533	2700.53	1522.27	997.07	2047.46	1420.67	1208.68	1632.65	0.970937	1.02993	0.864356	LT	1.14778	0.871244	0.818584	GT	1.22987	0.813095	0.706713	GT	1.18214	0.845923	0.66305	GT	1.26668	0.789464	0.504156	GT	1.07152	0.933257	0.831299	GT	-295	-294	-293	-1341	-1334	-1327	-2032	-2021	-2010
100912_at	P	P	P	P	969.017	844.264	1093.77	2667.5	2155.43	3179.57	1830.27	1193.38	2467.16	1992.03	1404.34	2579.73	0.363268	2.75279	6.76811e-05	LT	0.52944	1.88879	0.00457108	LT	0.486446	2.05573	0.00142067	LT	1.45744	0.686136	0.112732	GT	1.33908	0.746779	0.158631	GT	0.918793	1.08838	0.698954	LT	1423	1428	1433	11162	11214	11266	1971	1980	1989
100915_at	P	P	P	P	6559.87	5524.94	7594.8	3036	1780.97	4291.03	5379.47	4796.43	5962.5	4680.63	3861.85	5499.42	2.16069	0.462814	0.00305464	GT	1.21943	0.820057	0.19139	GT	1.40149	0.713526	0.0470392	GT	0.564368	1.77189	0.0431228	LT	0.64863	1.54171	0.103726	LT	1.1493	0.870092	0.257697	GT	-776	-774	-771	-485	-483	-481	417	418	420
100917_at	P	P	P	P	527.8	390.021	665.579	614.867	452.578	777.156	532.433	517.243	547.624	515.067	474.032	556.101	0.858397	1.16496	0.401865	LT	0.991298	1.00878	0.796341	LT	1.02472	0.975875	0.944629	GT	1.15482	0.865933	0.37885	GT	1.19376	0.837688	0.294851	GT	1.03372	0.967382	0.4736	GT	593	595	597	-367	-365	-364	724	727	730
100920_at	P	A	P	P	111.233	64.5099	157.957	111.367	84.8817	137.852	123.667	104.908	142.425	176.3	76.4167	276.183	0.998803	1.0012	0.738937	LT	0.899461	1.11178	0.539596	LT	0.630932	1.58496	0.249318	LT	0.900539	1.11045	0.489908	LT	0.631688	1.58306	0.252881	LT	0.701456	1.42561	0.367356	LT	632	636	640	-470	-466	-462	-278	-276	-273
100923_at	P	P	P	P	524.867	321.426	728.307	1294.9	988.602	1601.2	966.667	455.609	1477.72	965.8	663.938	1267.66	0.405334	2.4671	0.0747697	LT	0.542966	1.84174	0.23879	LT	0.543453	1.84009	0.180211	LT	1.33955	0.746518	0.353973	GT	1.34075	0.745849	0.234574	GT	1.0009	0.999103	0.868493	GT	-401	-399	-397	-2309	-2291	-2272	-1714	-1701	-1687
100925_at	P	P	P	P	454.383	262.082	646.684	280.433	70.7356	490.131	527.8	424.096	631.504	595.9	374.259	817.541	1.62029	0.617173	0.354713	GT	0.860901	1.16157	0.493539	LT	0.762516	1.31145	0.382262	LT	0.531325	1.88209	0.120802	LT	0.470605	2.12493	0.108054	LT	0.885719	1.12903	0.66467	LT	-732	-728	-723	353	357	360	5647	5698	5750
100927_at	P	P	P	P	2675.7	1959.65	3391.75	2162.27	1575.54	2748.99	2038.6	1732.36	2344.84	1592.4	1557.75	1627.05	1.23745	0.808113	0.408358	GT	1.31252	0.761894	0.280709	GT	1.68029	0.595134	0.0438326	GT	1.06066	0.942807	0.790895	GT	1.35787	0.736449	0.111167	GT	1.28021	0.781124	0.0360283	GT	-391	-390	-389	-1799	-1791	-1784	-1545	-1539	-1533
100928_at	P	P	P	P	9902.07	7832.61	11971.5	16720.8	11116.9	22324.7	13331.1	11661	15001.1	11681.5	10518.7	12844.3	0.592201	1.68862	0.0403285	LT	0.742781	1.34629	0.106554	LT	0.847671	1.1797	0.299352	LT	1.25427	0.797274	0.367528	GT	1.43139	0.698621	0.160598	GT	1.14121	0.876261	0.195933	GT	-474	-473	-471	-1951	-1944	-1938	2190	2197	2204
100929_at	P	P	P	P	566.033	408.143	723.923	161.9	103.13	220.67	357.667	307.459	407.875	562.4	498.432	626.368	3.49619	0.286026	0.00224685	GT	1.58257	0.631883	0.134298	GT	1.00646	0.993581	0.842273	GT	0.452656	2.20918	0.0123597	LT	0.287873	3.47375	0.00234667	LT	0.635965	1.57241	0.00789515	LT	413	414	416	1510	1516	1522	488	489	491
100931_at	P	P	P	P	2465.28	1882.42	3048.14	1707.47	1390.83	2024.1	3027.77	2037.86	4017.68	1773	1415.26	2130.74	1.44383	0.692605	0.143722	GT	0.814225	1.22816	0.380511	LT	1.39046	0.719187	0.18847	GT	0.563936	1.77325	0.0579802	LT	0.963038	1.03838	0.808881	LT	1.70771	0.58558	0.073081	GT	-808	-806	-804	-1457	-1451	-1446	-5216	-5196	-5176
100932_at	P	P	P	P	4065.72	2539.75	5591.68	3119.8	2006.13	4233.47	3839.2	2624.77	5053.63	3734.33	3136.54	4332.13	1.3032	0.767343	0.851897	GT	1.059	0.944286	0.834389	GT	1.08874	0.918493	0.838946	GT	0.812617	1.23059	0.452826	LT	0.835437	1.19698	0.366567	LT	1.02808	0.972685	0.979518	GT	-221	-220	-219	-3302	-3279	-3257	-1117	-1110	-1102
100935_at	P	P	P	P	1489.02	1245.09	1732.94	1782.5	1505.19	2059.81	1763.37	1454.4	2072.34	1816.9	1444.83	2188.97	0.835353	1.1971	0.220539	LT	0.844417	1.18425	0.258747	LT	0.819537	1.2202	0.211724	LT	1.01085	0.989266	0.923515	GT	0.981067	1.0193	0.921683	LT	0.970536	1.03036	0.859995	LT	-2967	-2959	-2951	644	647	649	-2749	-2739	-2728
100941_at	P	P	P	P	364.567	288.854	440.28	585.167	496.101	674.232	624.033	473.709	774.357	466.133	367.374	564.893	0.623013	1.6051	0.0187135	LT	0.58421	1.71171	0.0173377	LT	0.782108	1.2786	0.163943	LT	0.937717	1.06642	0.744011	LT	1.25536	0.796582	0.14792	GT	1.33874	0.746969	0.164303	GT	-1681	-1675	-1670	629	632	635	-1436	-1430	-1423
100943_at	P	P	P	P	1589.23	1376.99	1801.48	2173.37	2068.43	2278.3	2456.67	1409.87	3503.47	1803.97	1460.25	2147.69	0.731231	1.36756	0.0191232	LT	0.646906	1.54582	0.054482	LT	0.880966	1.13512	0.330388	LT	0.884681	1.13035	0.734616	LT	1.20477	0.830033	0.125943	GT	1.36181	0.734315	0.307381	GT	276	277	277	-1165	-1161	-1157	2119	2127	2134
100946_at	P	P	P	P	640.8	406.309	875.291	43252.7	10888	75617.4	17464	4335.96	30592.1	3782.67	786.229	6779.1	0.0148153	67.498	9.8e-06	LT	0.0366926	27.2535	0.000301648	LT	0.169404	5.90304	0.00336548	LT	2.47667	0.403767	0.20486	GT	11.4344	0.087455	0.0104944	GT	4.61686	0.216598	0.112235	GT	82	83	83	613	620	626	683	691	698
100947_at	P	A	P	P	644.167	374.888	913.445	242.7	103.265	382.135	748.167	465.546	1030.79	406.4	317.731	495.069	2.65417	0.376766	0.0662305	GT	0.860994	1.16145	0.529755	LT	1.58506	0.630893	0.421217	GT	0.324393	3.08268	0.025368	LT	0.597195	1.6745	0.128905	LT	1.84096	0.543194	0.0506638	GT	224	225	226	1972	1987	2001	665	670	675
100948_at	P	P	P	P	3232.55	2627.8	3837.3	1405.77	840.534	1971	2144.2	1929.09	2359.31	2446.9	2073.77	2820.03	2.29949	0.434879	0.00348033	GT	1.50758	0.663315	0.0375615	GT	1.32108	0.756957	0.142124	GT	0.655614	1.52529	0.08663	LT	0.574509	1.74062	0.0508743	LT	0.876292	1.14117	0.252115	LT	-5970	-5954	-5937	938	941	945	1343	1348	1353
100949_at	P	P	P	P	1155.78	1034.43	1277.14	566.9	427.163	706.637	672.5	600.496	744.504	679.133	618.593	739.673	2.03878	0.49049	0.000578927	GT	1.71864	0.581856	0.000575218	GT	1.70185	0.587596	0.000565424	GT	0.842974	1.18628	0.272144	LT	0.83474	1.19798	0.241461	LT	0.990233	1.00986	0.885698	LT	1515	1519	1523	364	366	367	785	788	791
100951_at	P	P	P	P	2114.92	1619.43	2610.41	887.267	855.978	918.556	1666.07	1200.79	2131.34	1824.1	1415.59	2232.61	2.38363	0.419528	0.00702019	GT	1.26941	0.787769	0.401919	GT	1.15943	0.862493	0.637803	GT	0.532552	1.87775	0.0117531	LT	0.486413	2.05586	0.00354939	LT	0.913364	1.09485	0.615852	LT	545	547	549	1933	1943	1954	830	835	839
100952_at	P	A	P	P	1441.53	1113.9	1769.17	781.3	397.203	1165.4	957.767	709.154	1206.38	856.967	628.085	1085.85	1.84504	0.541992	0.0249384	GT	1.5051	0.664408	0.0665283	GT	1.68213	0.594483	0.0278528	GT	0.815752	1.22586	0.418272	LT	0.911704	1.09685	0.652189	LT	1.11762	0.894755	0.577903	GT	-926	-923	-920	736	739	742	545	547	549
100953_at	P	P	P	P	2318.7	1687.69	2949.71	1225.53	929.576	1521.49	1526.83	1322.34	1731.33	2213.13	1994.42	2431.85	1.89199	0.528543	0.0439483	GT	1.51863	0.658487	0.15949	GT	1.0477	0.954472	0.976051	GT	0.802663	1.24585	0.19111	LT	0.553755	1.80585	0.0122708	LT	0.689897	1.44949	0.011586	LT	431	432	433	466	468	470	3295	3310	3324
100954_at	P	P	P	P	1016.58	768.268	1264.9	1292.87	989.952	1595.78	1636.77	1179.82	2093.72	1322.37	1197.41	1447.32	0.786302	1.27178	0.254364	LT	0.621092	1.61007	0.0548716	LT	0.768761	1.3008	0.174872	LT	0.789891	1.266	0.279829	LT	0.977692	1.02282	0.806599	LT	1.23776	0.807914	0.242062	GT	446	448	449	-767	-764	-760	553	556	558
100955_at	P	P	P	P	2595.42	2010.19	3180.65	867.867	709.934	1025.8	2467.67	1712.34	3222.99	1906.37	1706.99	2105.74	2.99057	0.334384	0.00107348	GT	1.05177	0.950779	0.872637	GT	1.36145	0.734513	0.199242	GT	0.351695	2.84337	0.00463435	LT	0.455246	2.19661	0.00193627	LT	1.29443	0.772538	0.215197	GT	342	343	344	-1521	-1514	-1508	436	438	439
100957_at	P	P	P	P	2535.95	2010.98	3060.92	1972.63	1252.74	2692.53	2040.17	1818.18	2262.15	2366.47	1852.18	2880.76	1.28557	0.777868	0.291262	GT	1.24301	0.804498	0.346494	GT	1.07162	0.933168	0.816382	GT	0.966898	1.03424	0.757725	LT	0.833577	1.19965	0.413412	LT	0.862115	1.15994	0.319549	LT	932	936	940	509	512	515	-629	-625	-622
100958_at	P	A	A	P	361.55	290.9	432.2	205.1	184.494	225.706	273.867	244.377	303.357	308.733	242.7	374.767	1.7628	0.56728	0.00812779	GT	1.32017	0.757479	0.130914	GT	1.17108	0.853916	0.401021	GT	0.748905	1.33528	0.019363	LT	0.664327	1.50528	0.0327287	LT	0.887065	1.12731	0.43158	LT	273	274	275	6985	7011	7037	2097	2104	2112
100959_at	P	P	P	P	19323.7	16702.6	21944.8	9617.7	4547.6	14687.8	11416.8	6427.67	16405.9	8791.2	7370.57	10211.8	2.00918	0.497716	0.0057035	GT	1.69257	0.590817	0.0150056	GT	2.19807	0.454944	0.000249033	GT	0.842419	1.18706	0.600324	LT	1.09401	0.914065	0.910569	GT	1.29866	0.770025	0.402434	GT	-41117	-40999	-40880	-3316	-3302	-3289	-1631	-1625	-1618
100960_g_at	P	P	P	P	6504.9	4724.07	8285.73	3925.53	2102.41	5748.66	4192.87	3389.7	4996.04	3306.67	2618.34	3995	1.65707	0.603473	0.0776607	GT	1.55142	0.644571	0.0985227	GT	1.96721	0.508335	0.0195301	GT	0.936241	1.0681	0.683268	LT	1.18716	0.842348	0.618316	GT	1.268	0.788641	0.189127	GT	-771	-769	-767	527	529	531	-3390	-3377	-3363
100961_at	P	P	P	P	2910.63	1984.25	3837.02	1490.63	1244.54	1736.73	1542.6	1012.79	2072.41	1661.37	1393.81	1928.92	1.95262	0.512134	0.0721376	GT	1.88684	0.529988	0.0935038	GT	1.75195	0.570792	0.127436	GT	0.966312	1.03486	0.9784	LT	0.897233	1.11454	0.412936	LT	0.928513	1.07699	0.654487	LT	-637	-635	-632	685	689	693	2099	2111	2122
100962_at	P	P	P	P	1712.7	1296.84	2128.56	660.867	378.449	943.284	1025.13	926.143	1124.12	948.067	851.343	1044.79	2.5916	0.385862	0.00584603	GT	1.67071	0.598548	0.0377898	GT	1.80652	0.553551	0.020789	GT	0.644664	1.5512	0.130185	LT	0.697068	1.43458	0.1857	LT	1.08129	0.924823	0.328807	GT	457	459	461	-695	-691	-687	459	461	464
100963_at	P	P	P	P	780.267	515.557	1044.98	561.8	462.547	661.053	485.533	347.622	623.445	376.833	271.116	482.551	1.38887	0.72001	0.382999	GT	1.60703	0.622266	0.190636	GT	2.07059	0.482955	0.0524579	GT	1.15708	0.864246	0.423929	GT	1.49084	0.670761	0.0802511	GT	1.28846	0.776122	0.314817	GT	-371	-369	-368	789	793	797	8154	8194	8233
100964_at	P	P	P	P	2726.95	1997.2	3456.7	2229.1	2016.04	2442.16	2378.97	1196.36	3561.57	2208.07	1973.16	2442.97	1.22334	0.817433	0.431205	GT	1.14627	0.872391	0.554407	GT	1.23499	0.80972	0.405759	GT	0.937003	1.06723	0.972634	LT	1.00953	0.990564	0.896463	GT	1.0774	0.928162	0.941626	GT	1110	1113	1115	980	984	987	717	719	722
100968_at	P	P	P	P	727.3	529.858	924.742	1862.9	1043.87	2681.93	962.1	855.262	1068.94	863.7	513.715	1213.69	0.390413	2.56139	0.00516094	LT	0.755951	1.32284	0.126021	LT	0.842075	1.18754	0.454698	LT	1.93629	0.516453	0.0583661	GT	2.15688	0.463632	0.0636701	GT	1.11393	0.897724	0.513613	GT	273	274	274	545	548	550	-1094	-1089	-1083
100970_at	P	P	P	P	4221.67	2554.85	5888.48	1870.53	942.576	2798.49	3070.2	2120.53	4019.87	3150.47	2352.03	3948.9	2.25693	0.443079	0.105299	GT	1.37505	0.727248	0.599838	GT	1.34001	0.746261	0.655769	GT	0.609255	1.64135	0.131775	LT	0.593732	1.68426	0.100671	LT	0.974522	1.02614	0.870593	LT	-301	-300	-298	1109	1116	1123	801	806	810
100974_at	P	A	P	P	696.167	443.147	949.186	402.533	279.299	525.768	556.567	348.023	765.11	493.667	305.149	682.184	1.72946	0.578214	0.332121	GT	1.25082	0.799473	0.778902	GT	1.4102	0.709121	0.588077	GT	0.723244	1.38266	0.298806	LT	0.815395	1.2264	0.459705	LT	1.12741	0.886986	0.70316	GT	-253	-252	-251	-1147	-1140	-1132	-817	-812	-806
100976_at	P	P	P	P	3049.42	2596.97	3501.87	1904.6	1522.89	2286.31	2479.1	1807.86	3150.34	2607.8	2415.47	2800.13	1.60108	0.624578	0.0069009	GT	1.23005	0.812975	0.166855	GT	1.16934	0.85518	0.21972	GT	0.768263	1.30164	0.211093	LT	0.730347	1.36921	0.0410626	LT	0.950648	1.05191	0.658681	LT	1146	1148	1150	12149	12181	12213	1509	1513	1517
100977_at	P	P	P	P	1261.93	1006.6	1517.27	703.333	444.407	962.26	1168.63	869.838	1467.43	729.2	573.898	884.502	1.79422	0.557346	0.0262931	GT	1.07984	0.926066	0.733712	GT	1.73057	0.577844	0.0197255	GT	0.601843	1.66156	0.0985809	LT	0.964527	1.03678	0.795546	LT	1.60262	0.623977	0.051383	GT	7085	7116	7147	2771	2788	2805	-572	-568	-565
100978_at	P	P	P	P	540.8	484.949	596.651	462.1	281.827	642.373	398.067	276.715	519.418	589.067	455.984	722.15	1.17031	0.854475	0.250843	GT	1.35857	0.73607	0.0406521	GT	0.918062	1.08925	0.517285	LT	1.16086	0.86143	0.602989	GT	0.784461	1.27476	0.302193	LT	0.675758	1.47982	0.105637	LT	-4728	-4715	-4701	-1366	-1360	-1354	-136	-136	-135
100979_at	P	P	P	P	598.95	391.111	806.789	1651.4	674.757	2628.04	1494.1	1293.16	1695.04	1648.5	1170.47	2126.53	0.362692	2.75716	0.0294867	LT	0.400877	2.49453	0.0156785	LT	0.36333	2.75232	0.0128582	LT	1.10528	0.904747	0.973674	GT	1.00176	0.998244	0.845865	GT	0.906339	1.10334	0.636391	LT	568	571	574	357	360	363	-733	-728	-722
100980_at	P	P	P	P	348.633	171.489	525.778	312.7	75.8263	549.574	375.533	136.021	615.046	484.133	169.004	799.263	1.11491	0.896931	0.99036	GT	0.928369	1.07716	0.772726	LT	0.720118	1.38866	0.449403	LT	0.832682	1.20094	0.775994	LT	0.645896	1.54824	0.423926	LT	0.775682	1.28919	0.630696	LT	-526	-522	-518	357	361	365	-142	-140	-139
100981_at	A	P	P	P	56.25	4.79928	107.701	7286.97	2791.62	11782.3	2306.5	1538.88	3074.12	9284.27	8598.09	9970.45	0.00771926	129.546	0.000105982	LT	0.0243876	41.0044	0.000347257	LT	0.00605864	165.054	4.83493e-05	LT	3.15932	0.316524	0.0506209	GT	0.784873	1.27409	0.363095	LT	0.248431	4.02526	0.00180323	LT	235	238	241	103	105	107	209	213	217
100982_at	P	P	P	P	489.817	392.029	587.604	622.133	535.253	709.013	620.067	502.549	737.585	801.933	747.663	856.203	0.787318	1.27014	0.176304	LT	0.789942	1.26592	0.200309	LT	0.610795	1.63721	0.0187563	LT	1.00333	0.996678	0.950734	GT	0.775792	1.28901	0.0296814	LT	0.773215	1.2933	0.0628165	LT	-521	-519	-517	-807	-803	-800	-4015	-3999	-3983
100983_at	P	P	P	P	530.717	380.5	680.933	451.667	412.674	490.659	627.733	565.207	690.26	754.6	657.365	851.835	1.17502	0.85105	0.640858	GT	0.845449	1.1828	0.355125	LT	0.703309	1.42185	0.115966	LT	0.71952	1.38982	0.00816279	LT	0.598551	1.6707	0.00315775	LT	0.831876	1.2021	0.0941123	LT	-240	-239	-238	-4952	-4933	-4913	551	554	556
100984_at	P	P	P	P	3746.7	2551.97	4941.43	5177.53	2990.84	7364.23	5893.4	4986.53	6800.27	5151.13	4689.87	5612.4	0.723646	1.38189	0.302155	LT	0.635745	1.57296	0.0841832	LT	0.727354	1.37485	0.171774	LT	0.878531	1.13826	0.529859	LT	1.00513	0.994901	0.853212	GT	1.1441	0.874051	0.212352	GT	383	385	386	643	647	650	-1569	-1560	-1551
100985_at	P	P	P	P	578.817	434.105	723.529	779.833	666.204	893.463	859.133	566.917	1151.35	695.733	590.22	801.247	0.742231	1.34729	0.103809	LT	0.673722	1.48429	0.0923818	LT	0.831952	1.20199	0.263695	LT	0.907698	1.10169	0.729406	LT	1.12088	0.892156	0.3367	GT	1.23486	0.809808	0.389852	GT	101	101	102	1460	1467	1474	733	737	740
100986_at	P	P	P	P	656.1	432.633	879.567	4851.43	3118.94	6583.92	1384.53	843.342	1925.72	1576.1	1310.45	1841.75	0.135238	7.39435	8.07833e-05	LT	0.473878	2.11025	0.0204561	LT	0.416281	2.40223	0.00393942	LT	3.50402	0.285386	0.0126982	GT	3.07813	0.324873	0.00723544	GT	0.878455	1.13836	0.518537	LT	5480	5502	5525	774	778	783	-7280	-7239	-7197
100987_f_at	A	P	A	A	926.567	589.991	1263.14	1167.2	626.189	1708.21	827.7	509.696	1145.7	1001.33	962.053	1040.61	0.793837	1.2597	0.483143	LT	1.11945	0.893298	0.851797	GT	0.925333	1.08069	0.581148	LT	1.41017	0.709133	0.416087	GT	1.16565	0.857894	0.772668	GT	0.826598	1.20978	0.3534	LT	-413	-411	-409	-8269	-8224	-8180	-573	-570	-567
100988_at	P	P	P	P	1662.1	1453.65	1870.55	1425.1	859.445	1990.75	1307.57	994.914	1620.22	1268.3	890.525	1646.08	1.1663	0.857409	0.311409	GT	1.27114	0.786696	0.0840774	GT	1.31049	0.763071	0.069141	GT	1.08989	0.917526	0.851908	GT	1.12363	0.889973	0.759618	GT	1.03096	0.96997	0.853468	GT	67	67	68	346	348	350	260	261	263
100989_at	P	P	P	P	1236.08	1127.47	1344.7	892.867	639.764	1145.97	1147	849.724	1444.28	962.5	865.136	1059.86	1.3844	0.722335	0.0173929	GT	1.07767	0.927931	0.45275	GT	1.28424	0.778669	0.0101192	GT	0.778437	1.28463	0.273943	LT	0.927654	1.07799	0.56364	LT	1.19169	0.839146	0.352833	GT	-8100	-8082	-8063	1709	1715	1720	488	490	491
100990_g_at	P	P	P	P	2739.35	2395.48	3083.22	1894.07	1513.2	2274.94	2360.37	1992.53	2728.21	2217.37	1835.25	2599.49	1.44628	0.691429	0.0119032	GT	1.16056	0.861652	0.186806	GT	1.23541	0.80945	0.0837415	GT	0.802446	1.24619	0.164078	LT	0.854196	1.17069	0.316598	LT	1.06449	0.939416	0.623049	GT	-353	-353	-352	-663	-662	-660	-18130	-18085	-18040
100992_at	P	P	P	P	1784.05	1467.45	2100.65	832.533	721.603	943.464	1603.07	1249.88	1956.25	1446.63	1026.61	1866.66	2.14292	0.466654	0.00114613	GT	1.1129	0.898555	0.541456	GT	1.23324	0.81087	0.252995	GT	0.519338	1.92553	0.00899418	LT	0.575497	1.73763	0.0389336	LT	1.10814	0.902416	0.602133	GT	-1860	-1855	-1850	662	664	667	1360	1365	1370
101000_at	P	P	P	P	918.7	645.606	1191.79	449.067	267.295	630.838	572.333	438.999	705.668	692.867	623.904	761.83	2.0458	0.488807	0.0725847	GT	1.60518	0.622982	0.220121	GT	1.32594	0.754182	0.51074	GT	0.784624	1.2745	0.312964	LT	0.648129	1.5429	0.0869423	LT	0.826037	1.2106	0.190523	LT	-319	-318	-317	-537	-534	-532	3619	3636	3653
101001_at	P	P	P	P	3111.35	2046.71	4175.99	1247.27	1020.36	1474.17	2383.63	1530.76	3236.51	1701.67	1345.12	2058.22	2.49453	0.400876	0.0107297	GT	1.3053	0.766109	0.419296	GT	1.82841	0.546922	0.065385	GT	0.523263	1.91109	0.0322886	LT	0.732968	1.36432	0.0861789	LT	1.40076	0.713896	0.189283	GT	5460	5476	5493	-2345	-2335	-2325	3549	3563	3578
101002_at	P	P	P	P	8078.35	5744.5	10412.2	9217.8	8435.22	10000.4	15056.8	12957.9	17155.7	12997.7	11931.2	14064.3	0.876386	1.14105	0.477416	LT	0.536525	1.86385	0.0388278	LT	0.62152	1.60896	0.0822045	LT	0.612202	1.63345	0.00440571	LT	0.709185	1.41007	0.00506518	LT	1.15842	0.863247	0.159537	GT	369	370	372	453	456	459	1342	1350	1358
101003_at	P	A	P	P	212.217	143.415	281.018	100.633	49.7968	151.47	110.367	66.1777	154.556	240.767	216.598	264.935	2.10881	0.474201	0.0328248	GT	1.92283	0.520066	0.0377952	GT	0.88142	1.13453	0.423311	LT	0.911809	1.09672	0.741017	LT	0.41797	2.39251	0.0400688	LT	0.458397	2.18152	0.0205432	LT	848	851	854	774	778	782	1167	1174	1180
101004_f_at	P	P	P	P	3611.88	2160.91	5062.86	1752.23	897.441	2607.03	3378.2	2118.29	4638.11	3893.2	3168.8	4617.6	2.0613	0.48513	0.0908139	GT	1.06917	0.935302	0.991929	GT	0.927742	1.07789	0.594308	LT	0.518688	1.92794	0.115199	LT	0.450075	2.22185	0.0514351	LT	0.867718	1.15245	0.454828	LT	568	571	573	-1069	-1063	-1056	2384	2398	2413
101006_at	P	P	P	P	544.283	494.052	594.514	289.4	170.256	408.544	327.933	261.383	394.483	389.533	374.217	404.85	1.88073	0.531708	0.00401097	GT	1.65974	0.602505	0.0011675	GT	1.39727	0.715681	0.00273138	GT	0.882496	1.13315	0.538911	LT	0.74294	1.346	0.192561	LT	0.841862	1.18784	0.149117	LT	-416	-415	-414	377	378	380	-2460	-2452	-2443
101007_at	P	P	P	P	3387.37	2181.6	4593.13	1345.93	753.167	1938.7	2652.47	1620.58	3684.35	1316.53	934.325	1698.74	2.51674	0.397339	0.0478786	GT	1.27706	0.783047	0.63117	GT	2.57294	0.38866	0.042154	GT	0.507427	1.97073	0.0958703	LT	1.02233	0.978156	0.993193	GT	2.01474	0.496343	0.0696633	GT	-368	-366	-365	829	835	841	487	490	494
101008_at	P	P	P	P	1810.55	1149.77	2471.33	2354.2	1283.86	3424.54	2655.23	2118.95	3191.51	2153.37	1856.32	2450.41	0.769072	1.30027	0.424317	LT	0.68188	1.46653	0.15965	LT	0.8408	1.18934	0.401271	LT	0.886626	1.12787	0.574513	LT	1.09326	0.914691	0.928451	GT	1.23306	0.81099	0.168323	GT	212	213	214	602	606	610	6852	6897	6941
101011_at	P	P	P	P	11267.6	9141.03	13394.2	14446.2	10607.9	18284.5	11775.7	10263	13288.4	10100.8	8833.93	11367.7	0.77997	1.2821	0.16372	LT	0.956852	1.04509	0.675302	LT	1.11552	0.896446	0.537431	GT	1.22678	0.815142	0.27745	GT	1.4302	0.699201	0.0856286	GT	1.16582	0.857766	0.168483	GT	-2663	-2658	-2653	-1163	-1159	-1156	7016	7035	7054
101013_at	P	P	P	P	24492.2	19178.4	29806	25895.9	18731.6	33060.1	23316.6	19635.8	26997.4	20259	17649.2	22868.7	0.945794	1.05731	0.734309	LT	1.05042	0.952002	0.868527	GT	1.20895	0.827161	0.329854	GT	1.11062	0.900399	0.612111	GT	1.27824	0.782324	0.222343	GT	1.15093	0.868865	0.261615	GT	-996	-995	-993	-1132	-1129	-1126	79539	79749	79958
101014_at	P	A	A	P	215.033	176.208	253.859	165.5	124.746	206.254	157.1	103.799	210.401	172.533	123.615	221.451	1.2993	0.769648	0.14141	GT	1.36877	0.730584	0.105203	GT	1.24633	0.802356	0.212293	GT	1.05347	0.949245	0.775774	GT	0.959235	1.0425	0.854837	LT	0.910549	1.09824	0.670194	LT	103	103	104	5541	5569	5597	227	229	230
101015_s_at	P	P	P	P	516.233	455.446	577.021	358.9	237.763	480.037	403.333	259.645	547.022	361	259.24	462.76	1.43838	0.695228	0.0336004	GT	1.27992	0.7813	0.110802	GT	1.43001	0.699296	0.025721	GT	0.889835	1.1238	0.679548	LT	0.994183	1.00585	0.951031	LT	1.11727	0.895041	0.698023	GT	850	853	856	-557	-554	-552	1476	1483	1490
101016_at	P	P	P	P	18850.3	15253	22447.6	21921	18963.7	24878.2	17595.2	16279.1	18911.3	18116.6	17433.4	18799.9	0.859921	1.1629	0.315268	LT	1.07133	0.933418	0.781364	GT	1.0405	0.961079	0.928177	GT	1.24585	0.802665	0.0506202	GT	1.20999	0.826452	0.0593781	GT	0.971218	1.02963	0.515072	LT	-793	-792	-790	-890	-888	-886	-10410	-10387	-10364
101017_at	P	P	P	P	2873.88	1916.39	3831.37	2720.07	1335.65	4104.48	3231.87	2228.58	4235.15	2968.5	2908.76	3028.24	1.05655	0.946478	0.880775	GT	0.889233	1.12456	0.571945	LT	0.968126	1.03292	0.690241	LT	0.84164	1.18816	0.533456	LT	0.91631	1.09133	0.59971	LT	1.08872	0.918509	0.72551	GT	-333	-331	-330	21700	21812	21924	-1836	-1826	-1817
101023_f_at	P	P	P	P	3966.05	2782.51	5149.59	2925.8	2734.98	3116.62	2699.73	1852.91	3546.56	3293.6	3009.76	3577.44	1.35554	0.737711	0.286169	GT	1.46905	0.680711	0.180105	GT	1.20417	0.830448	0.561414	GT	1.08374	0.922733	0.54264	GT	0.888329	1.12571	0.0987379	LT	0.819691	1.21997	0.233963	LT	448	449	451	-1854	-1846	-1839	1946	1953	1961
101025_f_at	P	A	P	P	211.083	174.21	247.956	264.333	207.972	320.695	225.267	171.688	278.845	259.767	228.34	291.193	0.79855	1.25227	0.14202	LT	0.937038	1.06719	0.66444	LT	0.812588	1.23064	0.122359	LT	1.17342	0.852207	0.393196	GT	1.01758	0.982724	0.946003	GT	0.867189	1.15315	0.347322	LT	2645	2654	2663	734	737	741	258	259	261
101026_at	P	A	A	P	81.3333	50.3877	112.279	33.0667	17.188	48.9453	55.8333	31.5239	80.1428	133.567	119.958	147.175	2.45968	0.406557	0.0721649	GT	1.45672	0.686475	0.468872	GT	0.608934	1.64221	0.128298	LT	0.592239	1.68851	0.188986	LT	0.247567	4.03931	0.00344709	LT	0.418018	2.39224	0.0197102	LT	40	40	41	268	271	275	459	466	472
101027_s_at	P	P	P	P	6376.28	4547.02	8205.54	6984.93	5672.1	8297.77	5137.5	4130.2	6144.8	5478.47	4932.07	6024.86	0.912862	1.09546	0.562728	LT	1.24113	0.80572	0.452287	GT	1.16388	0.859194	0.642688	GT	1.3596	0.735512	0.0951838	GT	1.27498	0.784326	0.107233	GT	0.937762	1.06637	0.556827	LT	-1619	-1615	-1610	1385	1391	1396	-1257	-1252	-1247
101029_f_at	P	P	P	P	803.133	633.942	972.324	714.5	363.732	1065.27	770.833	656.738	884.929	877.7	816.695	938.705	1.12405	0.889641	0.535336	GT	1.0419	0.959783	0.926705	GT	0.915043	1.09284	0.500188	LT	0.926919	1.07884	0.654447	LT	0.814059	1.22841	0.404407	LT	0.878242	1.13864	0.193021	LT	-3497	-3486	-3476	-627	-625	-622	-1219	-1213	-1208
101031_at	P	P	P	A	897.3	755.773	1038.83	888.333	715.876	1060.79	755.933	720.261	791.606	702.867	577.846	827.887	1.01009	0.990007	0.973854	GT	1.18701	0.842453	0.213806	GT	1.27663	0.783313	0.105428	GT	1.17515	0.850957	0.207648	GT	1.26387	0.79122	0.154133	GT	1.0755	0.9298	0.430975	GT	-2337	-2333	-2329	-1135	-1132	-1129	-1624	-1620	-1616
101034_at	P	A	P	A	775.2	507.19	1043.21	453.267	348.034	558.499	859.1	477.262	1240.94	851.2	567.172	1135.23	1.71025	0.584709	0.130902	GT	0.90234	1.10823	0.72142	LT	0.910714	1.09804	0.635374	LT	0.527606	1.89535	0.115203	LT	0.532503	1.87792	0.044785	LT	1.00928	0.990804	0.941386	GT	3044	3056	3068	-456	-453	-450	1908	1919	1930
101035_at	P	P	P	P	1710.18	1453.24	1967.13	867	744.644	989.356	1513.23	1017.77	2008.7	1885.53	1825.16	1945.91	1.97253	0.506963	0.00108285	GT	1.13015	0.884837	0.418787	GT	0.907002	1.10253	0.364107	LT	0.572945	1.74537	0.0368244	LT	0.459817	2.17478	0.000521174	LT	0.802549	1.24603	0.195121	LT	6448	6464	6480	-237	-237	-236	1600	1606	1612
101036_at	P	A	P	P	629.6	458.23	800.97	636.933	368.858	905.008	792.6	523.694	1061.51	789.4	664.462	914.338	0.988486	1.01165	0.970603	LT	0.794348	1.25889	0.349617	LT	0.797568	1.25381	0.278911	LT	0.8036	1.2444	0.466009	LT	0.806858	1.23938	0.371102	LT	1.00405	0.995963	0.924823	GT	-622	-620	-618	-306	-304	-303	-1160	-1155	-1150
101039_at	P	P	P	P	3127.13	2784.15	3470.12	2719.17	1868.72	3569.61	3227.8	2944.52	3511.08	2603.87	2181.01	3026.72	1.15003	0.86954	0.271364	GT	0.968813	1.03219	0.67724	LT	1.20096	0.832669	0.101564	GT	0.842421	1.18705	0.303318	LT	1.04428	0.957597	0.896773	GT	1.23962	0.8067	0.0756611	GT	-1432	-1429	-1426	-614	-612	-610	-10523	-10488	-10453
101040_at	P	P	P	P	2135.72	1753.38	2518.05	2762.1	2636.85	2887.35	2936.7	2414.16	3459.24	2666.6	2429.56	2903.64	0.773222	1.29329	0.0728845	LT	0.727251	1.37504	0.0535142	LT	0.800914	1.24857	0.115973	LT	0.940546	1.06321	0.586573	LT	1.03581	0.965425	0.514562	GT	1.10129	0.908026	0.414396	GT	-389	-389	-388	-1040	-1038	-1035	2261	2266	2272
101042_f_at	P	P	P	P	1387.6	1117.93	1657.27	1048.03	638.717	1457.35	1409.77	891.444	1928.09	1012.4	777.177	1247.62	1.324	0.755285	0.178418	GT	0.984276	1.01597	0.963431	LT	1.3706	0.729605	0.111464	GT	0.743409	1.34515	0.313934	LT	1.0352	0.966	0.970504	GT	1.3925	0.718133	0.210115	GT	1180	1183	1186	1582	1588	1594	871	875	878
101044_at	P	P	P	P	7682.73	6272.34	9093.13	6024.23	5900.92	6147.54	4644.2	4186.51	5101.89	6993.37	6568.97	7417.76	1.2753	0.784126	0.128282	GT	1.65426	0.604498	0.00824351	GT	1.09857	0.910271	0.585474	GT	1.29715	0.77092	0.00683859	GT	0.861421	1.16087	0.0102779	LT	0.664086	1.50583	0.00220724	LT	-402	-401	-400	-1875	-1870	-1865	3609	3618	3628
101045_at	P	P	P	P	5903.02	4929.7	6876.34	5070.5	4745.84	5395.16	5254.37	4602.39	5906.34	3933.6	3430.64	4436.56	1.16419	0.858968	0.331055	GT	1.12345	0.890116	0.471225	GT	1.50067	0.666371	0.0225799	GT	0.965007	1.03626	0.680552	LT	1.28902	0.775781	0.0267973	GT	1.33577	0.748634	0.0368611	GT	-481	-480	-479	1129	1132	1136	851	853	856
101050_at	P	P	P	P	1349.57	1134.81	1564.33	908.133	788.278	1027.99	1353.83	1146.1	1561.56	1505.13	1413.76	1596.51	1.48609	0.672907	0.0193098	GT	0.996848	1.00316	0.921107	LT	0.896643	1.11527	0.336104	LT	0.670787	1.49079	0.019601	LT	0.603357	1.65739	0.00257585	LT	0.899477	1.11176	0.264146	LT	-504	-503	-502	-656	-654	-652	-387	-386	-385
101051_at	P	P	P	P	899.05	733.267	1064.83	1277.07	957.595	1596.54	1150.1	684.222	1615.98	1136.03	912.303	1359.76	0.703996	1.42046	0.0635099	LT	0.781715	1.27924	0.339409	LT	0.791394	1.26359	0.162772	LT	1.1104	0.900579	0.627087	GT	1.12415	0.889565	0.526832	GT	1.01238	0.987769	0.916762	GT	-11419	-11381	-11342	-820	-816	-812	-9520	-9475	-9430
101052_g_at	P	P	P	P	460.117	280.851	639.382	965.333	738.34	1192.33	608.4	326.569	890.231	774.4	681.537	867.263	0.47664	2.09802	0.0190385	LT	0.756273	1.32227	0.383605	LT	0.594159	1.68305	0.0528049	LT	1.58668	0.630249	0.165326	GT	1.24656	0.80221	0.19707	GT	0.78564	1.27285	0.342672	LT	-540	-538	-535	-21134	-20998	-20862	-857	-851	-846
101053_at	P	P	P	P	2425.68	1937.93	2913.44	2694.43	2500.89	2887.98	2315.57	1795.01	2836.12	2499.17	2411.26	2587.08	0.900257	1.11079	0.446109	LT	1.04755	0.954604	0.867766	GT	0.970597	1.03029	0.729369	LT	1.16362	0.859389	0.26778	GT	1.07813	0.92753	0.138749	GT	0.926536	1.07929	0.506759	LT	-879	-877	-875	-4996	-4981	-4967	-912	-909	-907
101054_at	P	P	P	P	2253.33	1458.04	3048.62	3405	1893.5	4916.5	3000.23	1792.57	4207.9	2360.5	2035.03	2685.97	0.661772	1.51109	0.22164	LT	0.751053	1.33146	0.335518	LT	0.9546	1.04756	0.662647	LT	1.13491	0.881126	0.769438	GT	1.44249	0.693245	0.332142	GT	1.27102	0.786772	0.466944	GT	-536	-534	-532	-731	-727	-722	-7906	-7858	-7810
101055_at	P	P	P	P	1116.3	655.403	1577.2	1656.5	700.474	2612.53	1129.1	857.807	1400.39	632.233	547.369	717.098	0.673891	1.48392	0.237086	LT	0.988664	1.01147	0.763456	LT	1.76565	0.566365	0.103488	GT	1.4671	0.681618	0.340538	GT	2.62008	0.381668	0.0333163	GT	1.78589	0.559944	0.0135272	GT	-574	-572	-569	-576744	-573103	-569462	1600	1610	1620
101056_at	P	P	P	P	3002.15	1816.87	4187.43	2231.67	1064.48	3398.86	2524.07	2395.48	2652.65	3100.23	2450.49	3749.98	1.34525	0.743356	0.544043	GT	1.18941	0.840753	0.894541	GT	0.968363	1.03267	0.701944	LT	0.884155	1.13102	0.543496	LT	0.719838	1.3892	0.298592	LT	0.814154	1.22827	0.172111	LT	976	980	985	477	480	483	-1642	-1631	-1620
101057_at	P	P	P	P	1093.18	913.692	1272.67	1625.83	1147.36	2104.31	1176.67	1028.6	1324.74	1039.47	1012.04	1066.9	0.672383	1.48725	0.0440461	LT	0.929051	1.07637	0.516431	LT	1.05168	0.950862	0.78716	GT	1.38173	0.723731	0.153173	GT	1.5641	0.639344	0.0577951	GT	1.13199	0.883399	0.13851	GT	2581	2586	2591	2388	2395	2401	570	571	573
101060_at	P	P	P	P	4181.27	3198.46	5164.08	3091.93	1314.1	4869.77	3840.27	3505.69	4174.84	4245.63	3203.64	5287.63	1.35231	0.739473	0.235919	GT	1.0888	0.918446	0.815603	GT	0.984839	1.01539	0.859874	LT	0.805135	1.24203	0.351304	LT	0.728262	1.37313	0.282004	LT	0.904522	1.10556	0.571941	LT	-777	-774	-772	-2074	-2064	-2054	1235	1241	1247
101061_at	P	P	P	P	3814.28	3285.28	4343.28	4529.73	2983.83	6075.63	3272.5	2679	3866	3926.77	3456.05	4397.48	0.842055	1.18757	0.337255	LT	1.16556	0.857959	0.268514	GT	0.971355	1.02949	0.745925	LT	1.38418	0.722449	0.181229	GT	1.15355	0.866887	0.536168	GT	0.833383	1.19993	0.165168	LT	-383	-382	-382	-1108	-1105	-1102	2682	2689	2696
101062_at	P	A	P	P	292.867	269.18	316.553	173.567	157.143	189.99	177.5	166.972	188.028	235.033	204.254	265.813	1.68734	0.592647	0.000106954	GT	1.64995	0.606078	9.23204e-05	GT	1.24606	0.802527	0.0201247	GT	0.97784	1.02266	0.696493	LT	0.738477	1.35414	0.0217689	LT	0.755212	1.32413	0.019815	LT	-703	-701	-700	-244	-244	-243	-447	-445	-444
101064_at	P	P	P	P	3637.68	3215.91	4059.46	5336.53	4588.24	6084.83	4458.33	4153.46	4763.21	3498.47	3285.23	3711.7	0.681657	1.46701	0.00550969	LT	0.815929	1.2256	0.0481621	LT	1.03979	0.961729	0.729777	GT	1.19698	0.835436	0.0975381	GT	1.52539	0.655569	0.00631917	GT	1.27437	0.784703	0.00661585	GT	2298	2301	2305	740	742	743	-4823	-4813	-4803
101065_at	P	P	P	P	14951.7	10932.9	18970.5	10184	6252.69	14115.4	12022.3	9325.8	14718.8	12144.7	10537.2	13752.3	1.46815	0.681129	0.153637	GT	1.24366	0.804076	0.394406	GT	1.23113	0.812264	0.421996	GT	0.847095	1.1805	0.465834	LT	0.838556	1.19253	0.401966	LT	0.989919	1.01018	0.89604	LT	487	488	490	510	512	514	579	582	584
101067_at	P	P	P	P	4209.57	3574.11	4845.02	3306.5	2684.43	3928.57	3234.33	2263.26	4205.4	2997.5	2931.46	3063.54	1.27312	0.785473	0.106446	GT	1.30153	0.768329	0.111284	GT	1.40436	0.712069	0.0212004	GT	1.02231	0.978174	0.854172	GT	1.10309	0.906548	0.430043	GT	1.07901	0.926775	0.755972	GT	-1121	-1119	-1116	-3046	-3036	-3027	3558	3569	3580
101069_g_at	P	P	P	P	595.533	455.02	736.047	557.633	352.74	762.526	614.033	402.488	825.579	548	440.537	655.463	1.06797	0.93636	0.826133	GT	0.969871	1.03106	0.842479	LT	1.08674	0.920184	0.849262	GT	0.908148	1.10114	0.70467	LT	1.01758	0.982725	0.955769	GT	1.1205	0.89246	0.648674	GT	-341	-340	-339	-2319	-2308	-2298	-549	-546	-544
101070_at	P	A	A	A	172.833	142.926	202.741	103.2	14.1434	192.257	127.133	80.7435	173.523	174.433	130.855	218.012	1.67474	0.597107	0.121707	GT	1.35947	0.735583	0.138636	GT	0.990827	1.00926	0.926503	LT	0.811746	1.23191	0.503616	LT	0.59163	1.69025	0.294599	LT	0.728836	1.37205	0.226368	LT	-249	-247	-246	-343	-340	-337	-553	-548	-543
101072_at	P	P	P	P	3880.97	3305.56	4456.37	1357.3	842.906	1871.69	2440.47	1918.35	2962.58	2651.17	2122.7	3179.63	2.85933	0.349732	0.000423399	GT	1.59026	0.62883	0.0139209	GT	1.46387	0.68312	0.0292731	GT	0.556164	1.79803	0.0471514	LT	0.511963	1.95327	0.0292896	LT	0.920526	1.08634	0.596516	LT	-3739	-3727	-3716	-8645	-8607	-8570	728	731	734
101073_at	P	P	P	P	1804.38	1280.56	2328.21	1137.8	687.04	1588.56	2075.37	1225.79	2924.94	1271.37	866.496	1676.24	1.58585	0.630576	0.131571	GT	0.869429	1.15018	0.616701	LT	1.41925	0.704599	0.232107	GT	0.54824	1.82402	0.150615	LT	0.894942	1.11739	0.678728	LT	1.63239	0.612599	0.19683	GT	-356	-355	-353	290	292	294	1476	1484	1492
101074_at	P	P	P	P	2533.27	1795.62	3270.91	2585.63	2073.38	3097.89	1832.07	1603.3	2060.84	1738.57	1647.87	1829.26	0.979747	1.02067	0.784503	LT	1.38274	0.723203	0.207235	GT	1.4571	0.686294	0.140007	GT	1.41132	0.708556	0.0452774	GT	1.48722	0.672395	0.0186046	GT	1.05378	0.948965	0.529558	GT	-738	-736	-734	-1280	-1275	-1269	849	853	856
101078_at	P	P	P	P	7115.87	5335.61	8896.13	7521.1	6175.37	8866.83	6111.13	5135.93	7086.34	5533.27	3971.31	7095.22	0.94612	1.05695	0.688974	LT	1.16441	0.858804	0.679972	GT	1.28602	0.777596	0.419815	GT	1.23072	0.812532	0.173143	GT	1.35925	0.735699	0.153282	GT	1.10443	0.90544	0.541827	GT	-361	-360	-359	6675	6704	6733	-679	-676	-673
101079_at	P	P	P	P	1456.2	1246.21	1666.19	1393.8	985.701	1801.9	1614.83	1509.75	1719.91	1620.27	1571.7	1668.83	1.04477	0.957149	0.748211	GT	0.901765	1.10894	0.361544	LT	0.898741	1.11267	0.339449	LT	0.863123	1.15858	0.35135	LT	0.860229	1.16248	0.333288	LT	0.996647	1.00336	0.914246	LT	-2280	-2276	-2271	-298	-297	-297	1512	1516	1520
101080_at	P	P	P	P	1187.35	1007.12	1367.58	1009.67	723.176	1296.16	1145.73	850.165	1441.3	1080.73	901.624	1259.84	1.17598	0.850353	0.330262	GT	1.03632	0.96495	0.819339	GT	1.09865	0.910206	0.559781	GT	0.881241	1.13476	0.553546	LT	0.934242	1.07039	0.654938	LT	1.06014	0.943268	0.780042	GT	-1871	-1865	-1859	-968	-964	-960	-1992	-1984	-1975
101081_at	P	P	P	P	6252.32	5689.82	6814.82	4089.37	2754	5424.73	4813.47	4076.94	5550	5484.13	4595.15	6373.12	1.52892	0.654056	0.00850806	GT	1.29892	0.769869	0.0176576	GT	1.14007	0.877136	0.165338	GT	0.849568	1.17707	0.357023	LT	0.745672	1.34107	0.15026	LT	0.877708	1.13933	0.310645	LT	-859	-857	-856	7752	7773	7793	642	644	646
101082_at	P	P	P	P	1071.4	865.772	1277.03	1001.23	550.599	1451.87	1225.73	1190.39	1261.07	1297.73	933.91	1661.56	1.07008	0.934509	0.657451	GT	0.874089	1.14405	0.325041	LT	0.825593	1.21125	0.312437	LT	0.816844	1.22422	0.374277	LT	0.771525	1.29613	0.378298	LT	0.944519	1.05874	0.823775	LT	-8881	-8846	-8812	648	651	655	-504	-502	-499
101083_s_at	P	P	P	P	5590.75	4154.13	7027.37	3373.8	2950.81	3796.79	3991.6	2882.47	5100.73	5381.2	3521.7	7240.7	1.65711	0.603461	0.0817653	GT	1.40063	0.713965	0.244049	GT	1.03894	0.962518	0.951989	GT	0.845225	1.18312	0.385689	LT	0.626961	1.595	0.0688548	LT	0.741768	1.34813	0.257017	LT	-1019	-1016	-1013	-1308	-1302	-1297	886	890	893
101084_f_at	P	P	P	P	5678.8	4623.97	6733.63	4885.37	2875.47	6895.27	4672.1	2809.08	6535.12	3782.03	2493.22	5070.85	1.16241	0.860282	0.371978	GT	1.21547	0.822727	0.272463	GT	1.50152	0.665992	0.0466296	GT	1.04565	0.956346	0.885902	GT	1.29173	0.774155	0.422187	GT	1.23534	0.809493	0.50577	GT	-1800	-1796	-1791	1792	1799	1806	3582	3595	3608
101085_at	P	P	P	P	2596.82	2283.34	2910.29	2549.87	2139.06	2960.67	2617.57	2278.83	2956.3	2371.57	1800.52	2942.62	1.01841	0.98192	0.882252	GT	0.992073	1.00799	0.901888	LT	1.09498	0.913259	0.454486	GT	0.974136	1.02655	0.805757	LT	1.07518	0.930075	0.630631	GT	1.10373	0.90602	0.497073	GT	-690	-688	-687	8035	8057	8079	1160	1163	1166
101086_f_at	P	P	P	P	10159.1	8336.16	11982	19043.5	13231.4	24855.6	12847	9442.49	16251.6	16130	12249.6	20010.4	0.533468	1.87453	0.00811757	LT	0.790773	1.26459	0.16918	LT	0.629825	1.58774	0.0174847	LT	1.48232	0.674616	0.142258	GT	1.18062	0.84701	0.493438	GT	0.796468	1.25554	0.256075	LT	4394	4405	4416	-889	-886	-883	-3772	-3759	-3746
101088_f_at	P	P	P	P	6732.87	6045.5	7420.23	16444.5	11808.9	21080.1	10251.1	8226.08	12276.1	12956.3	10645.5	15267.1	0.40943	2.44242	0.000123565	LT	0.656795	1.52255	0.0035699	LT	0.51966	1.92434	0.000217311	LT	1.60417	0.623376	0.0502406	GT	1.26923	0.78788	0.234691	GT	0.791206	1.26389	0.14748	LT	-1536	-1533	-1529	658	661	663	11156	11193	11230
101090_at	P	P	A	P	309.1	57.1953	561.005	424.933	223.144	626.722	126.233	71.1782	181.288	173.4	120.174	226.626	0.727408	1.37474	0.316379	LT	2.44864	0.40839	0.364148	GT	1.78258	0.560984	0.708465	GT	3.36625	0.297066	0.0247528	GT	2.4506	0.408064	0.0535213	GT	0.727989	1.37365	0.270602	LT	864	871	878	245	248	251	145	147	149
101091_at	P	P	P	P	5148	4031.47	6264.53	5464.83	4817.15	6112.52	5368.97	4511.95	6225.98	4752.17	4132.89	5371.44	0.942023	1.06154	0.626394	LT	0.958844	1.04292	0.712815	LT	1.0833	0.923109	0.767891	GT	1.01786	0.982458	0.851018	GT	1.14997	0.86959	0.199324	GT	1.12979	0.885118	0.314178	GT	11137	11164	11191	1030	1033	1037	-2198	-2191	-2183
101093_at	P	P	P	P	4437.92	3430.3	5445.53	3022.13	2538.67	3505.59	4218.97	3731.68	4706.25	3202.4	2968.16	3436.64	1.46847	0.68098	0.0718983	GT	1.0519	0.950664	0.894481	GT	1.38581	0.7216	0.11072	GT	0.716321	1.39602	0.0303608	LT	0.943709	1.05965	0.531667	LT	1.31744	0.759048	0.0161719	GT	641	643	644	-1134	-1130	-1126	1344	1349	1353
101094_at	P	P	P	P	982.2	883.212	1081.19	1080.23	649.483	1510.98	1143.07	801.048	1485.09	913.167	765.819	1060.51	0.909248	1.09981	0.734002	LT	0.859267	1.16378	0.341562	LT	1.0756	0.929716	0.468881	GT	0.945031	1.05817	0.790723	LT	1.18295	0.845342	0.604873	GT	1.25176	0.798874	0.31833	GT	-418	-417	-416	1975	1982	1989	-379	-377	-376
101096_s_at	P	P	P	P	3281.5	2565	3998	4988.07	3758.77	6217.36	4005.27	3708.43	4302.1	4013.8	3396.9	4630.7	0.65787	1.52006	0.0520706	LT	0.819296	1.22056	0.220135	LT	0.817554	1.22316	0.237617	LT	1.24538	0.80297	0.178035	GT	1.24273	0.804681	0.217951	GT	0.997874	1.00213	0.979024	LT	-462	-461	-460	-1479	-1475	-1470	1229	1233	1236
101097_at	P	P	P	P	6363.12	5048.6	7677.64	6756.63	4292.2	9221.07	6774.47	4991.57	8557.37	5972.07	5518.17	6425.96	0.941758	1.06184	0.795315	LT	0.939279	1.06465	0.691382	LT	1.06548	0.938544	0.799987	GT	0.997368	1.00264	0.937049	LT	1.13137	0.883882	0.659242	GT	1.13436	0.881555	0.475626	GT	-2047	-2042	-2038	-736	-734	-732	-1467	-1462	-1457
101101_at	P	P	P	P	2696.47	2510.89	2882.05	3087.27	2886.24	3288.29	3614.4	3480.07	3748.73	3615.2	3453.43	3776.97	0.873416	1.14493	0.0466454	LT	0.746034	1.34042	0.000920031	LT	0.745869	1.34072	0.000981664	LT	0.854157	1.17074	0.0149246	LT	0.853968	1.171	0.0175767	LT	0.999779	1.00022	0.998385	LT	-2711	-2707	-2704	-504	-503	-502	-1018	-1016	-1014
101102_at	P	P	P	P	1225.5	1000.95	1450.05	1315.37	621.636	2009.1	1258.47	1022.43	1494.5	1272.43	965.2	1579.67	0.931679	1.07333	0.913157	LT	0.973804	1.0269	0.80567	LT	0.963115	1.0383	0.796598	LT	1.04521	0.956742	0.962091	GT	1.03374	0.96736	0.95219	GT	0.989024	1.0111	0.979788	LT	-635	-634	-632	-368	-367	-366	-349	-347	-346
101104_at	P	P	P	P	1326.43	1061.73	1591.13	1329.3	725.893	1932.71	1565.7	1389.79	1741.61	1204.27	1024.18	1384.35	0.997843	1.00216	0.909988	LT	0.847182	1.18038	0.33256	LT	1.10144	0.907898	0.735677	GT	0.849013	1.17784	0.460119	LT	1.10383	0.90594	0.90117	GT	1.30013	0.769155	0.0521752	GT	-1213	-1209	-1206	-1242	-1236	-1231	604	607	609
101105_at	P	P	P	P	31255	27581.9	34928	35042.7	28520.4	41564.9	30486	27728.7	33243.4	26868.6	25480.1	28257.2	0.891912	1.12119	0.326363	LT	1.02522	0.975398	0.847263	GT	1.16325	0.859659	0.148067	GT	1.14947	0.869969	0.293015	GT	1.30422	0.766741	0.0655201	GT	1.13463	0.881342	0.0819425	GT	1753	1755	1757	2646	2651	2656	1999	2003	2006
101106_at	P	P	P	P	1363.27	947.666	1778.87	1091.9	1013.62	1170.18	1163.97	834.556	1493.38	1821.13	1625.5	2016.77	1.24853	0.800944	0.471132	GT	1.17122	0.853807	0.622863	GT	0.748581	1.33586	0.164263	LT	0.938085	1.066	0.76214	LT	0.599572	1.66786	0.00143754	LT	0.639144	1.56459	0.0340993	LT	445	446	448	561	563	566	5082	5103	5124
101107_at	P	P	P	P	3178.4	2773.42	3583.38	2349.07	1618.06	3080.07	3171.8	2975.47	3368.13	2987.03	2896.06	3078	1.35305	0.739072	0.0612748	GT	1.00208	0.997923	0.941657	GT	1.06407	0.939792	0.600447	GT	0.74061	1.35024	0.123657	LT	0.786421	1.27158	0.181902	LT	1.06186	0.941747	0.170494	GT	-1669	-1666	-1663	-744	-742	-740	29688	29765	29841
101108_at	P	P	P	P	814.733	576.452	1053.02	434.4	267.921	600.879	731.367	631.433	831.3	921.367	609.406	1233.33	1.87554	0.533181	0.0730744	GT	1.11399	0.897676	0.861164	GT	0.884266	1.13088	0.588368	LT	0.593957	1.68362	0.070734	LT	0.471474	2.12101	0.0556542	LT	0.793785	1.25979	0.357818	LT	1256	1261	1265	748	752	756	781	785	789
101109_at	P	P	P	P	3440.25	2851.88	4028.62	920.5	629.644	1211.36	1503.17	1288.8	1717.53	2052.53	1825.48	2279.59	3.73737	0.267568	0.000147949	GT	2.28867	0.436935	0.000900246	GT	1.6761	0.596623	0.0106682	GT	0.612374	1.63299	0.0499483	LT	0.44847	2.2298	0.00988523	LT	0.732347	1.36547	0.0256173	LT	-697	-695	-693	-4190	-4172	-4154	1604	1611	1618
101110_at	P	P	P	P	16147.8	14662.4	17633.1	10032.4	5213.8	14851	15400.2	14325	16475.4	14000.2	13057.4	14943	1.60956	0.621288	0.021278	GT	1.04854	0.953706	0.573665	GT	1.15339	0.867006	0.0990371	GT	0.651446	1.53505	0.129335	LT	0.71659	1.3955	0.199033	LT	1.1	0.909092	0.126643	GT	-4409	-4397	-4385	-955	-951	-948	-7109	-7083	-7057
101112_g_at	P	P	P	P	5774.7	4929.18	6620.22	4646.43	3466.84	5826.03	5794.7	5477.38	6112.02	5487.67	5256.99	5718.35	1.24282	0.804619	0.141035	GT	0.996549	1.00346	0.886021	LT	1.05231	0.950295	0.72115	GT	0.801842	1.24713	0.148524	LT	0.846705	1.18105	0.236666	LT	1.05595	0.947015	0.195392	GT	-701	-700	-699	-2168	-2162	-2156	818	821	823
101113_at	P	P	P	P	3605.7	1944.11	5267.29	2130.4	1210.62	3050.18	1981.93	1641.34	2322.53	2285.73	1968.01	2603.45	1.6925	0.590842	0.300959	GT	1.81928	0.549667	0.242588	GT	1.57748	0.633922	0.408857	GT	1.07491	0.93031	0.887262	GT	0.932042	1.07291	0.642823	LT	0.867089	1.15328	0.268781	LT	-518	-516	-514	2921	2938	2955	-1303	-1296	-1288
101114_at	P	A	A	A	204.617	152.16	257.073	165.633	76.3919	254.875	182.433	148.293	216.574	232.067	169.354	294.78	1.23536	0.809481	0.398256	GT	1.1216	0.891586	0.713092	GT	0.881715	1.13415	0.521342	LT	0.907912	1.10143	0.623146	LT	0.713732	1.40109	0.323246	LT	0.786125	1.27206	0.272447	LT	-481	-479	-477	-391	-389	-387	273	275	276
101123_at	P	P	P	P	4396.5	3391.52	5401.48	2295.27	1816.02	2774.51	3310.97	2505.37	4116.57	3394.97	3235.89	3554.05	1.91546	0.522067	0.0104443	GT	1.32786	0.753091	0.190006	GT	1.29501	0.772198	0.215799	GT	0.693232	1.44252	0.0902767	LT	0.676079	1.47912	0.0253748	LT	0.975257	1.02537	0.762911	LT	940	942	944	912	915	918	-1004	-1001	-997
101129_at	P	P	P	P	33877.4	26144.9	41609.9	39478.7	20975.9	57981.5	29718.7	25188.4	34248.9	26197.9	23997.9	28397.9	0.858119	1.16534	0.567268	LT	1.13994	0.877242	0.580685	GT	1.29313	0.773315	0.234274	GT	1.32841	0.752778	0.370344	GT	1.50694	0.663596	0.187514	GT	1.13439	0.88153	0.241706	GT	463	464	465	1581	1586	1592	-4663	-4648	-4632
101130_at	P	A	P	P	837.2	696.347	978.053	643.133	546.896	739.371	1109.2	716.961	1501.44	813.133	704.223	922.044	1.30175	0.768196	0.124691	GT	0.754778	1.32489	0.194473	LT	1.0296	0.971253	0.923063	GT	0.579817	1.72468	0.0706867	LT	0.790932	1.26433	0.0910313	LT	1.36411	0.733081	0.249593	GT	515	517	519	223	224	225	-3432	-3415	-3397
101137_at	P	P	P	P	35007.6	28677.6	41337.5	44725.2	27652.1	61798.4	31726.7	27447.2	36006.2	26229.1	23736.3	28721.9	0.782725	1.27759	0.261717	LT	1.10341	0.906282	0.620424	GT	1.33468	0.749241	0.118017	GT	1.4097	0.70937	0.191071	GT	1.70518	0.58645	0.0606632	GT	1.2096	0.826719	0.0893531	GT	871	873	875	1753	1758	1764	5135	5151	5167
101143_at	P	A	A	A	183.583	117.863	249.304	258.9	200.53	317.27	199.333	154.003	244.663	215.3	183.605	246.995	0.70909	1.41026	0.268441	LT	0.920987	1.08579	0.624474	LT	0.852686	1.17276	0.478738	LT	1.29883	0.769924	0.194339	GT	1.20251	0.831595	0.262608	GT	0.92584	1.0801	0.582212	LT	4350	4371	4393	322	324	327	662881	667450	672020
101148_at	P	P	P	P	520.067	335.518	704.615	453.7	147.956	759.444	762.167	654.604	869.729	906.267	740.041	1072.49	1.14628	0.872388	0.687511	GT	0.682353	1.46552	0.208854	LT	0.573856	1.7426	0.108559	LT	0.595277	1.67989	0.217595	LT	0.500625	1.9975	0.146654	LT	0.840996	1.18907	0.234181	LT	-1301	-1293	-1285	-175	-173	-172	-414	-410	-406
101152_at	P	P	P	P	435.2	368.38	502.02	589.333	495.016	683.651	441.933	353.381	530.485	484.333	378.778	589.888	0.738462	1.35417	0.0482996	LT	0.984764	1.01547	0.878902	LT	0.898555	1.1129	0.464272	LT	1.33353	0.749887	0.0901395	GT	1.21679	0.821833	0.237781	GT	0.912457	1.09594	0.598986	LT	1135	1138	1140	-1698	-1693	-1687	6588	6608	6629
101157_at	P	A	P	P	526.35	456.799	595.901	524.933	408.908	640.958	495.033	406.376	583.691	560	443.036	676.964	1.0027	0.997309	0.979627	GT	1.06326	0.940502	0.642023	GT	0.939911	1.06393	0.631597	LT	1.0604	0.94304	0.725985	GT	0.937381	1.0668	0.693962	LT	0.883988	1.13124	0.44278	LT	1607	1610	1614	1281	1285	1289	-609	-607	-605
101160_at	P	P	P	P	173.1	116.218	229.982	605.567	115.179	1095.95	324.667	227.968	421.365	272.033	199.146	344.921	0.285848	3.49836	0.0344637	LT	0.533162	1.8756	0.0564834	LT	0.636319	1.57154	0.12126	LT	1.8652	0.536137	0.4519	GT	2.22608	0.449221	0.303904	GT	1.19348	0.837885	0.474895	GT	435	437	440	5926	5973	6019	-995	-987	-980
101161_at	P	P	P	A	274.733	248.683	300.784	402.233	246.201	558.266	298.133	207.558	388.709	267.267	237.9	296.633	0.68302	1.46409	0.0618617	LT	0.921512	1.08517	0.607513	LT	1.02794	0.972822	0.77602	GT	1.34917	0.741195	0.335029	GT	1.50499	0.664457	0.162431	GT	1.11549	0.896467	0.599154	GT	350	351	352	422	424	426	2509	2520	2532
101165_at	P	P	P	P	1280.65	1112.03	1449.27	1511.47	1213.94	1808.99	1272.47	1049.56	1495.38	1321.27	1037.92	1604.62	0.84729	1.18023	0.226084	LT	1.00643	0.99361	0.98395	GT	0.969259	1.03172	0.821553	LT	1.18782	0.841875	0.295623	GT	1.14395	0.874162	0.435685	GT	0.963066	1.03835	0.836169	LT	-2426	-2419	-2412	-1556	-1550	-1544	-764	-761	-758
101168_at	P	P	A	P	132.9	104.785	161.015	125.5	120.393	130.607	119.867	99.9957	139.738	143.233	80.2212	206.245	1.05896	0.944319	0.855254	GT	1.10873	0.901931	0.633271	GT	0.927857	1.07775	0.795164	LT	1.047	0.955113	0.584869	GT	0.876193	1.1413	0.708704	LT	0.836863	1.19494	0.578496	LT	594	597	599	27462	27611	27760	-845	-841	-836
101178_at	P	A	P	P	224.2	173.831	274.569	176.833	97.1546	256.512	288.967	248.477	329.457	260.967	220.344	301.59	1.26786	0.78873	0.30256	GT	0.775868	1.28888	0.162234	LT	0.859114	1.16399	0.355461	LT	0.611951	1.63412	0.0862896	LT	0.677609	1.47578	0.14321	LT	1.10729	0.903103	0.398264	GT	-468	-466	-465	-427	-425	-422	-3123	-3107	-3090
101179_at	P	P	P	P	7879.17	5819.76	9938.57	9254.03	3742.41	14765.7	5846.37	3922.95	7769.78	5635.3	4548.36	6722.24	0.851431	1.17449	0.708173	LT	1.3477	0.742003	0.282856	GT	1.39818	0.715215	0.225053	GT	1.58287	0.631764	0.327912	GT	1.64215	0.608956	0.278422	GT	1.03745	0.963898	0.91844	GT	478	480	482	554	557	560	-803	-799	-795
101180_at	P	P	P	P	565.617	286.317	844.917	463.633	148.45	778.816	513.3	266.64	759.96	1053.9	681.418	1426.38	1.21997	0.819695	0.861052	GT	1.10192	0.907505	0.908221	GT	0.536689	1.86328	0.152174	LT	0.90324	1.10712	0.746378	LT	0.439922	2.27313	0.0972312	LT	0.487048	2.05319	0.0946939	LT	-11813	-11728	-11642	187	189	191	-621	-615	-608
101186_at	P	A	P	A	102.633	84.0277	121.239	101.367	79.1664	123.567	87.5	71.144	103.856	93.6333	59.3266	127.94	1.0125	0.987658	0.988721	GT	1.17295	0.85255	0.375076	GT	1.09612	0.912309	0.592724	GT	1.15848	0.863203	0.386913	GT	1.08259	0.923709	0.661957	GT	0.934496	1.0701	0.849516	LT	209	210	212	96	97	98	909	917	924
101197_at	A	P	P	P	228.183	139.693	316.673	1203.4	522.788	1884.01	427.6	328.136	527.064	1058.57	757.071	1360.06	0.189616	5.27383	0.00134182	LT	0.533637	1.87393	0.0358018	LT	0.215559	4.63911	0.000634849	LT	2.81431	0.355327	0.0408347	GT	1.13682	0.879647	0.861669	GT	0.403942	2.4756	0.00878977	LT	143	144	145	313	316	318	1303	1314	1325
101207_at	P	P	P	P	44931	34422.2	55439.7	52101.1	32709.7	71492.5	38114.6	32237.5	43991.7	32448.1	29539.3	35357	0.86238	1.15958	0.495061	LT	1.17884	0.848292	0.474212	GT	1.3847	0.722178	0.1381	GT	1.36696	0.73155	0.215095	GT	1.60567	0.622792	0.0740108	GT	1.17463	0.851332	0.155407	GT	843	845	847	1398	1403	1408	-12507	-12464	-12421
101210_at	P	A	P	P	901.133	760.629	1041.64	511.367	364.131	658.602	604.467	420.554	788.379	747.233	610.488	883.978	1.76221	0.567471	0.00607352	GT	1.49079	0.670785	0.0307056	GT	1.20596	0.829215	0.21011	GT	0.84598	1.18206	0.465655	LT	0.684347	1.46125	0.0834245	LT	0.80894	1.23619	0.270723	LT	709	711	713	-616	-613	-611	776	779	783
101212_at	P	P	P	P	32676.2	27498.8	37853.7	37706.7	27078.7	48334.7	31095.5	27738.9	34452.2	24348.7	19419.3	29278.1	0.86659	1.15395	0.391179	LT	1.05083	0.951625	0.801073	GT	1.34201	0.74515	0.0867675	GT	1.21261	0.824669	0.29682	GT	1.54861	0.645739	0.0658058	GT	1.27709	0.783029	0.0985558	GT	626	627	629	998	1001	1004	-2152	-2146	-2140
101213_at	P	P	P	P	50849.4	41528.2	60170.6	63522.7	39719.4	87326.1	45410.7	42169	48652.4	39649.3	32711.1	46587.5	0.800492	1.24923	0.294553	LT	1.11977	0.893043	0.56393	GT	1.28248	0.77974	0.185818	GT	1.39885	0.714874	0.171642	GT	1.60211	0.624175	0.0900109	GT	1.14531	0.873126	0.217286	GT	740	742	743	4122	4136	4150	-3178	-3167	-3157
101214_f_at	P	P	P	P	22055.6	19548	24563.2	22188.8	17150.3	27227.3	21215.9	18741.3	23690.6	15571	14512.9	16629	0.993996	1.00604	0.996613	LT	1.03958	0.96193	0.713821	GT	1.41646	0.705988	0.00487628	GT	1.04586	0.956155	0.815507	GT	1.42501	0.701749	0.0551817	GT	1.36253	0.733928	0.0117975	GT	-2622	-2617	-2613	9931	9954	9977	3887	3896	3905
101217_at	P	P	P	P	146.267	136.561	155.972	176.5	146.419	206.581	171.267	111.173	231.361	182.433	109.424	255.443	0.828706	1.2067	0.0434944	LT	0.854029	1.17092	0.337942	LT	0.801754	1.24727	0.322821	LT	1.03056	0.970349	0.796825	GT	0.967477	1.03362	0.968823	LT	0.93879	1.0652	0.889674	LT	-820	-818	-816	555	558	560	-1859	-1852	-1845
101221_at	P	P	P	P	134.483	110.506	158.461	138.133	75.0459	201.221	97.7	90.7696	104.63	135.233	101.451	169.015	0.973576	1.02714	0.989615	LT	1.37649	0.726484	0.097462	GT	0.994454	1.00558	0.9409	LT	1.41385	0.707288	0.283021	GT	1.02144	0.979006	0.954149	GT	0.722455	1.38417	0.085724	LT	2052	2058	2064	647	650	652	-404	-402	-401
101226_at	P	P	P	P	249.967	186.542	313.392	334.167	168.093	500.24	245.933	168.04	323.827	290.367	264.144	316.589	0.74803	1.33684	0.295379	LT	1.0164	0.983865	0.992687	GT	0.860866	1.16162	0.350195	LT	1.35877	0.73596	0.390523	GT	1.15084	0.868928	0.742084	GT	0.846975	1.18067	0.322738	LT	-1621	-1616	-1611	440	442	444	12935	12992	13049
101254_at	P	P	P	P	37249.7	27975.8	46523.5	44051.5	31575.6	56527.4	29877.5	23974.5	35780.6	28558.2	24259.8	32856.6	0.845594	1.1826	0.3991	LT	1.24675	0.802089	0.382865	GT	1.30434	0.76667	0.285569	GT	1.4744	0.678241	0.0874994	GT	1.54252	0.648291	0.0568139	GT	1.0462	0.955842	0.757629	GT	683	684	686	-8217	-8189	-8160	-4375	-4360	-4345
101255_at	P	P	P	P	41384.8	32717	50052.7	59440.9	42571	76310.9	40104.8	34241.7	45968	34909.6	29192.1	40627	0.696235	1.4363	0.0965536	LT	1.03192	0.969071	0.982469	GT	1.18549	0.843535	0.453047	GT	1.48214	0.674701	0.0729648	GT	1.70271	0.587298	0.0339466	GT	1.14882	0.870458	0.285039	GT	858	860	862	-19046	-18980	-18914	-1167	-1163	-1159
101282_at	P	P	P	A	802.317	653.197	951.437	867.867	701.293	1034.44	731.633	668.427	794.84	763.767	703.217	824.316	0.92447	1.0817	0.558707	LT	1.09661	0.911901	0.615443	GT	1.05047	0.951952	0.837602	GT	1.1862	0.843025	0.191346	GT	1.1363	0.880051	0.306682	GT	0.957928	1.04392	0.514926	LT	810	812	813	-19127	-19066	-19006	-989	-986	-983
101290_at	P	P	P	P	216.55	178.897	254.203	358.667	282.822	434.511	246.4	138.601	354.199	305.267	276.194	334.34	0.603764	1.65628	0.0104157	LT	0.878856	1.13784	0.613339	LT	0.70938	1.40968	0.0323598	LT	1.45563	0.686989	0.158998	GT	1.17493	0.851115	0.255095	GT	0.807163	1.23891	0.304629	LT	-1107	-1104	-1100	395	397	399	-693	-690	-687
101291_at	P	P	P	P	308.233	261.271	355.196	463.267	281.37	645.163	321.9	252.393	391.407	346.367	306.313	386.421	0.665348	1.50297	0.0623266	LT	0.957544	1.04434	0.745792	LT	0.889905	1.12372	0.29203	LT	1.43916	0.694848	0.232888	GT	1.3375	0.747662	0.308655	GT	0.929362	1.07601	0.564672	LT	-579	-577	-576	-754	-751	-748	20806	20893	20979
101294_g_at	P	P	P	P	2347.67	1502.67	3192.67	1240.47	677.594	1803.34	1436.97	1113.94	1760	1965.5	1808.89	2122.11	1.89257	0.528383	0.280408	GT	1.63377	0.612083	0.45604	GT	1.19444	0.837214	0.960364	GT	0.863254	1.15841	0.533775	LT	0.63112	1.58448	0.13133	LT	0.731095	1.36781	0.05372	LT	-211	-210	-209	-284	-283	-281	-507	-504	-501
101295_s_at	P	P	P	P	1028.05	708.721	1347.38	1985.4	1015.49	2955.31	1446.8	1286.33	1607.27	1243.8	1100.57	1387.03	0.517805	1.93123	0.11891	LT	0.710568	1.40732	0.251033	LT	0.82654	1.20986	0.43435	LT	1.37227	0.72872	0.396441	GT	1.59624	0.626473	0.204787	GT	1.16321	0.85969	0.143871	GT	-298	-297	-296	-18763	-18662	-18561	548	551	554
101300_at	P	P	P	P	281.783	238.769	324.798	467.533	398.674	536.393	330.467	282.56	378.374	545.633	461.405	629.862	0.602702	1.65919	0.00375045	LT	0.852683	1.17277	0.206109	LT	0.516434	1.93636	0.000847597	LT	1.41477	0.70683	0.034356	GT	0.856864	1.16705	0.230631	LT	0.605657	1.6511	0.00986998	LT	-1143	-1141	-1138	902	905	908	23651	23732	23813
101313_r_at	P	A	P	P	120.217	91.5964	148.837	135.067	64.357	205.776	114.7	105.969	123.431	106.967	76.2274	137.706	0.890054	1.12353	0.721911	LT	1.0481	0.954111	0.959488	GT	1.12387	0.889782	0.644891	GT	1.17756	0.84921	0.707804	GT	1.2627	0.791955	0.544743	GT	1.0723	0.932578	0.592223	GT	703	706	709	425	427	430	546	549	552
101317_f_at	A	P	A	A	181.95	143.098	220.802	404.8	367.389	442.211	275.833	223.933	327.734	371.4	259.737	483.063	0.449481	2.22479	0.00420164	LT	0.659637	1.51598	0.0682275	LT	0.489903	2.04122	0.0128109	LT	1.46755	0.681406	0.0201589	GT	1.08993	0.91749	0.529352	GT	0.742685	1.34647	0.176657	LT	-222	-221	-221	-1198	-1192	-1186	-637	-634	-631
101328_at	P	P	P	P	915.217	555.117	1275.32	1820.9	1376.3	2265.5	1083.53	676.13	1490.94	1135.63	932.891	1338.38	0.502618	1.98958	0.202444	LT	0.844659	1.18391	0.551537	LT	0.805909	1.24084	0.479963	LT	1.68052	0.595054	0.0869433	GT	1.60342	0.623666	0.0442631	GT	0.954123	1.04808	0.738771	LT	-181	-180	-179	-830	-823	-816	-3996	-3963	-3930
101333_at	P	A	A	P	175.667	137.792	213.542	159.1	100.739	217.461	148.233	125.675	170.792	191.133	150.207	232.06	1.10413	0.905693	0.638211	GT	1.18507	0.843833	0.447173	GT	0.919079	1.08805	0.591981	LT	1.07331	0.931699	0.884986	GT	0.832403	1.20134	0.42716	LT	0.775549	1.28941	0.142099	LT	2360	2369	2377	1385	1392	1400	-587	-584	-581
101344_at	P	P	P	P	848.317	794.975	901.658	1113.27	876.855	1349.68	869.867	642.825	1096.91	972.133	763.709	1180.56	0.762007	1.31232	0.0182461	LT	0.975226	1.0254	0.923924	LT	0.872634	1.14596	0.19517	LT	1.27981	0.781364	0.216489	GT	1.14518	0.873226	0.434261	GT	0.894802	1.11757	0.542744	LT	-2259	-2255	-2251	3609	3619	3629	-441	-439	-438
101347_at	P	A	A	A	99.55	78.2677	120.832	99.9	19.4995	180.301	81.9	62.9339	100.866	119.2	97.985	140.415	0.996496	1.00352	0.645424	LT	1.21551	0.822702	0.359651	GT	0.835151	1.19739	0.286535	LT	1.21978	0.81982	0.983039	GT	0.838087	1.19319	0.484708	LT	0.687081	1.45543	0.0709311	LT	635	638	641	-1941	-1928	-1915	-315	-312	-310
101349_at	P	A	P	A	100.283	66.008	134.559	99.5	43.1876	155.812	78.6	46.0581	111.142	130.067	95.8867	164.247	1.00787	0.992189	0.996649	GT	1.27587	0.783779	0.575426	GT	0.771015	1.29699	0.327996	LT	1.2659	0.78995	0.621329	GT	0.764992	1.3072	0.364304	LT	0.604305	1.65479	0.127319	LT	-171	-170	-169	200	202	203	266	268	271
101350_g_at	P	P	P	P	3516.97	2273.99	4759.95	1964.1	1004.53	2923.67	2061.17	1874.44	2247.9	3337.93	3173.42	3502.44	1.79063	0.558464	0.232298	GT	1.7063	0.586064	0.295425	GT	1.05364	0.949094	0.855619	GT	0.952907	1.04942	0.686791	LT	0.588418	1.69947	0.0663466	LT	0.617498	1.61944	0.000842006	LT	-1276	-1270	-1264	-1347	-1338	-1329	1097	1105	1112
101356_at	P	P	P	P	214.917	170.999	258.835	174.033	111.276	236.791	127.467	86.0197	168.914	205.667	170.437	240.896	1.23492	0.809771	0.334574	GT	1.68606	0.593098	0.0327316	GT	1.04498	0.95696	0.905175	GT	1.36532	0.732427	0.308023	GT	0.846191	1.18177	0.421123	LT	0.619773	1.61349	0.0528525	LT	-1521	-1516	-1512	304	305	307	-2898	-2886	-2874
101357_at	P	P	P	P	869.667	459.356	1279.98	588.933	328.716	849.15	1009.9	389.487	1630.31	649.6	333.419	965.781	1.47668	0.677194	0.578204	GT	0.861141	1.16125	0.714383	LT	1.33877	0.746953	0.727374	GT	0.58316	1.7148	0.399436	LT	0.906609	1.10301	0.781021	LT	1.55465	0.643232	0.494152	GT	-180	-179	-178	-432	-429	-426	4345	4379	4412
101358_at	P	A	P	P	778.95	616.555	941.345	500.933	353.271	648.596	584.8	432.865	736.735	528.667	409.126	648.207	1.555	0.643088	0.0603311	GT	1.33199	0.750754	0.19321	GT	1.47342	0.678691	0.0850105	GT	0.856589	1.16742	0.49083	LT	0.947541	1.05536	0.766644	LT	1.10618	0.904013	0.639489	GT	-367	-366	-364	522	525	528	456	458	461
101362_at	P	A	A	A	148.433	108.831	188.036	109.1	93.0734	125.127	133.867	113.858	153.876	175.633	139.358	211.908	1.36053	0.73501	0.31389	GT	1.10881	0.901864	0.830669	GT	0.845132	1.18325	0.406088	LT	0.81499	1.22701	0.136851	LT	0.62118	1.60984	0.0230347	LT	0.762194	1.312	0.116585	LT	-633	-631	-629	-3103	-3091	-3078	-8991	-8954	-8918
101363_at	P	P	P	P	424.15	368.754	479.546	422.7	342.914	502.486	318.733	265.99	371.477	353.133	291.514	414.753	1.00343	0.996581	0.9882	GT	1.33074	0.751464	0.0410884	GT	1.2011	0.832567	0.161087	GT	1.32619	0.754041	0.0978684	GT	1.197	0.835423	0.255878	GT	0.902586	1.10793	0.462839	LT	1144	1147	1150	-2227	-2220	-2212	-350	-349	-347
101366_f_at	P	P	P	P	314.133	192.173	436.094	230.6	148.082	313.118	268.8	163.229	374.371	307.5	269.062	345.938	1.36224	0.734083	0.459395	GT	1.16865	0.855688	0.756864	GT	1.02157	0.978884	0.813426	GT	0.857887	1.16565	0.654342	LT	0.749919	1.33348	0.205013	LT	0.874146	1.14397	0.488141	LT	-5634	-5611	-5587	349	351	353	-3324	-3305	-3286
101367_at	P	P	P	P	3433.05	2215.51	4650.59	2159.13	540.328	3777.94	3007.17	2226.31	3788.03	2533.37	2003.46	3063.27	1.59001	0.628926	0.24787	GT	1.14162	0.875946	0.888236	GT	1.35513	0.737935	0.532349	GT	0.717996	1.39277	0.321171	LT	0.852278	1.17333	0.496983	LT	1.18702	0.842443	0.392069	GT	-329	-328	-326	-397	-395	-392	-2861	-2842	-2824
101369_at	P	P	P	P	709.15	540.436	877.864	780.433	618.082	942.785	527.333	439.242	615.424	746.133	365.837	1126.43	0.908662	1.10052	0.5815	LT	1.34479	0.743613	0.2819	GT	0.950433	1.05215	0.895725	LT	1.47996	0.675693	0.0519279	GT	1.04597	0.95605	0.740892	GT	0.706755	1.41492	0.315833	LT	156	156	157	1070	1076	1083	259	260	262
101370_at	P	P	P	P	673.7	393.772	953.628	501.1	393.877	608.323	853.5	568.597	1138.4	893.967	818.963	968.97	1.34444	0.743803	0.62311	GT	0.789338	1.26688	0.384852	LT	0.753608	1.32695	0.279833	LT	0.587112	1.70325	0.0585004	LT	0.560535	1.78401	0.00839105	LT	0.954734	1.04741	0.689568	LT	347	348	350	-1221	-1214	-1207	816	820	825
101371_at	P	P	P	P	1666.72	1317.32	2016.11	1740.43	1392.04	2088.82	1307.27	1060.49	1554.04	1692.33	1409.74	1974.93	0.957645	1.04423	0.716794	LT	1.27496	0.784336	0.177339	GT	0.984863	1.01537	0.832666	LT	1.33135	0.751116	0.112728	GT	1.02842	0.972363	0.855058	GT	0.772464	1.29456	0.115571	LT	-894	-891	-889	-687	-684	-682	1273	1278	1283
101372_at	P	P	P	P	777.083	672.522	881.645	748.867	504.958	992.775	729.1	654.138	804.062	1061.9	923.697	1200.1	1.03768	0.963689	0.738387	GT	1.06581	0.938252	0.642038	GT	0.731786	1.36652	0.0257659	LT	1.02711	0.973605	0.998204	GT	0.705214	1.41801	0.117177	LT	0.686599	1.45645	0.0111169	LT	2128	2133	2138	-616	-614	-612	1668	1673	1679
101376_at	A	P	P	P	168.683	148.308	189.058	230.8	168.625	292.975	210.067	162.813	257.321	249.433	155.198	343.668	0.730864	1.36824	0.048586	LT	0.802999	1.24533	0.123776	LT	0.676266	1.47871	0.0714357	LT	1.0987	0.910168	0.638964	GT	0.925297	1.08073	0.843369	LT	0.842176	1.1874	0.590262	LT	-408	-407	-405	-426	-424	-422	-540	-538	-536
101377_at	P	A	A	P	263.617	223.544	303.689	137.833	111.378	164.289	154.067	122.369	185.764	256.667	204.493	308.841	1.91258	0.522855	0.00213341	GT	1.71106	0.584434	0.00669064	GT	1.02708	0.973636	0.882082	GT	0.894634	1.11778	0.501878	LT	0.537013	1.86215	0.0116292	LT	0.60026	1.66595	0.0273341	LT	-34113	-34018	-33923	728	731	734	12386	12435	12484
101380_at	P	P	P	A	553.95	422.751	685.149	654.867	427.735	881.999	567.1	539.661	594.539	424.367	392.326	456.408	0.845897	1.18218	0.42391	LT	0.976812	1.02374	0.747033	LT	1.30536	0.766074	0.228632	GT	1.15476	0.865978	0.528874	GT	1.54316	0.64802	0.0757658	GT	1.33634	0.74831	0.00321208	GT	-244	-243	-242	-630	-628	-626	1988	1995	2003
101381_at	P	P	P	P	289.15	230.403	347.897	421.1	216.235	625.965	355.533	348.744	362.323	476.4	357.374	595.426	0.686654	1.45634	0.219275	LT	0.813285	1.22958	0.15584	LT	0.606948	1.64759	0.0193629	LT	1.18442	0.844297	0.767691	GT	0.883921	1.13132	0.5953	LT	0.746292	1.33996	0.09837	LT	433	435	437	243	245	247	-470	-467	-463
101382_at	P	A	A	A	263.083	186.627	339.539	65.8333	1.9311	129.736	201.567	168.052	235.081	270.6	251.738	289.462	3.9962	0.250238	0.00595982	GT	1.30519	0.76617	0.456561	GT	0.972222	1.02857	0.722116	LT	0.326608	3.06177	0.0473987	LT	0.243287	4.11038	0.0246445	LT	0.744888	1.34248	0.0328096	LT	1567	1574	1581	-139	-138	-137	799	804	809
101385_at	P	P	P	P	3088.62	2265.64	3911.6	2005.13	1257.63	2752.64	2536.6	1883.58	3189.62	2696.9	2329.3	3064.5	1.54035	0.649201	0.150762	GT	1.21762	0.821274	0.530317	GT	1.14525	0.873174	0.71994	GT	0.790481	1.26505	0.322635	LT	0.743496	1.345	0.168386	LT	0.940561	1.06319	0.650843	LT	-338	-337	-336	-930	-927	-923	-1684	-1677	-1671
101387_at	P	P	P	P	907.017	634.171	1179.86	859.833	523.765	1195.9	885.633	766.251	1005.02	788.2	634.922	941.478	1.05487	0.94798	0.916163	GT	1.02414	0.976425	0.89293	GT	1.15074	0.869003	0.72935	GT	0.970868	1.03001	0.773554	LT	1.09088	0.916689	0.799596	GT	1.12361	0.889985	0.384007	GT	-317	-316	-315	-853	-850	-846	871	874	878
101389_at	P	P	P	P	1586.37	1284.88	1887.86	2527.57	1824.56	3230.57	2046.57	1093.09	3000.05	2472.4	1910.44	3034.36	0.627626	1.59331	0.0285224	LT	0.775136	1.2901	0.305281	LT	0.64163	1.55853	0.0282147	LT	1.23503	0.809698	0.408314	GT	1.02231	0.978174	0.933728	GT	0.827765	1.20807	0.422153	LT	-653	-651	-649	-596	-594	-591	2568	2578	2589
101392_at	P	P	P	P	1201.93	907.759	1496.11	996.567	521.061	1472.07	1596.77	1216.64	1976.89	1328.93	1000.07	1657.79	1.20607	0.829136	0.49283	GT	0.752729	1.3285	0.212392	LT	0.904435	1.10566	0.583041	LT	0.624115	1.60227	0.117853	LT	0.7499	1.33351	0.276929	LT	1.20154	0.832265	0.335531	GT	1211	1215	1220	-1936	-1926	-1915	411	413	415
101393_at	P	P	P	P	5998.52	3852.36	8144.67	8268.13	5817.21	10719.1	7496.2	6519.61	8472.79	6076.6	5642.43	6510.77	0.725498	1.37836	0.211039	LT	0.800208	1.24968	0.286215	LT	0.98715	1.01302	0.736391	LT	1.10298	0.906638	0.662126	GT	1.36065	0.734942	0.145538	GT	1.23362	0.810624	0.049574	GT	-13063	-13025	-12986	-6302	-6276	-6249	-2060	-2052	-2043
101395_at	P	A	P	P	307.3	264.827	349.773	334.3	244.212	424.388	314	287.37	340.63	354.9	289.124	420.676	0.919234	1.08786	0.603083	LT	0.978662	1.0218	0.764106	LT	0.865878	1.1549	0.245248	LT	1.06465	0.939276	0.794348	GT	0.941955	1.06162	0.710737	LT	0.884756	1.13025	0.347674	LT	1093	1096	1099	526	528	530	-757	-754	-752
101397_at	P	A	A	A	655.933	501.08	810.787	533.7	300.403	766.997	492.8	375.56	610.04	634.7	558.632	710.768	1.22903	0.81365	0.445457	GT	1.33103	0.751296	0.302199	GT	1.03345	0.967629	0.96464	GT	1.083	0.923365	0.896243	GT	0.84087	1.18924	0.420675	LT	0.77643	1.28795	0.122955	LT	-535	-534	-532	-355	-353	-352	-698	-695	-692
101399_at	P	A	P	A	1708.37	1377.43	2039.31	1228.03	803.866	1652.2	2076.3	1237.36	2915.24	1216.7	886.637	1546.76	1.39114	0.718835	0.109962	GT	0.822794	1.21537	0.448472	LT	1.4041	0.712201	0.0884518	GT	0.591453	1.69075	0.15782	LT	1.00931	0.990771	0.9894	GT	1.7065	0.585994	0.135116	GT	-3434	-3421	-3408	2262	2275	2287	-3820	-3800	-3780
101401_at	P	A	P	P	395.817	234.834	556.8	251.033	76.0246	426.042	343.833	325.631	362.035	378.633	289.742	467.524	1.57675	0.634216	0.342216	GT	1.15119	0.868668	0.990415	GT	1.04538	0.956588	0.841707	GT	0.730102	1.36967	0.26106	LT	0.662999	1.5083	0.216621	LT	0.908091	1.10121	0.545352	LT	-309	-307	-305	1138	1147	1157	1427	1438	1450
101402_at	P	P	P	P	1706.92	1428.72	1985.12	1392.33	1007.61	1777.06	1434.33	1121.9	1746.76	1345.17	1105.18	1585.15	1.22594	0.815701	0.243955	GT	1.19004	0.840307	0.293716	GT	1.26893	0.788068	0.150183	GT	0.970718	1.03017	0.846006	LT	1.03506	0.966124	0.915395	GT	1.06629	0.937834	0.699163	GT	-4402	-4392	-4382	-4426	-4412	-4397	6368	6388	6409
101403_at	P	A	P	A	263.633	195.034	332.233	342.767	208.828	476.705	285.667	180.199	391.134	264.267	210.285	318.248	0.769134	1.30016	0.310201	LT	0.92287	1.08358	0.744849	LT	0.997603	1.0024	0.878828	LT	1.19988	0.833414	0.60314	GT	1.29705	0.770981	0.425407	GT	1.08098	0.925088	0.855623	GT	577	580	584	416	419	422	-687	-682	-677
101404_at	P	P	P	P	269.45	208.513	330.387	657.367	449.631	865.102	495.667	379.348	611.986	630.433	495.781	765.086	0.409893	2.43966	0.00459264	LT	0.543611	1.83955	0.017977	LT	0.427404	2.3397	0.00335259	LT	1.32623	0.754019	0.282892	GT	1.04272	0.959028	0.909939	GT	0.786232	1.27189	0.224089	LT	-364	-363	-362	-938	-933	-928	-712	-709	-705
101405_at	P	A	A	A	558.083	374.872	741.294	214.867	51.6292	378.104	386.6	281.74	491.46	388.167	367.967	408.366	2.59735	0.385008	0.0785841	GT	1.44357	0.692728	0.532771	GT	1.43774	0.695535	0.557953	GT	0.555785	1.79926	0.205942	LT	0.553542	1.80655	0.1832	LT	0.995964	1.00405	0.880987	LT	-349	-347	-345	-686	-680	-675	626	632	637
101406_at	P	P	P	P	122.517	104.393	140.64	110.533	64.9342	156.132	175.333	162.639	188.027	154.333	130.912	177.755	1.10841	0.90219	0.472746	GT	0.698764	1.4311	0.0112255	LT	0.793844	1.25969	0.0836936	LT	0.630418	1.58625	0.0922221	LT	0.716199	1.39626	0.194077	LT	1.13607	0.880228	0.207505	GT	-290	-289	-288	-469	-467	-465	-2786	-2774	-2762
101407_at	P	P	P	P	1362.53	1023.56	1701.51	824.9	700.856	948.944	958.633	766.515	1150.75	973.4	929.186	1017.61	1.65176	0.605416	0.0259918	GT	1.42133	0.703567	0.101509	GT	1.39977	0.714405	0.102262	GT	0.860496	1.16212	0.323825	LT	0.847442	1.18002	0.101626	LT	0.98483	1.0154	0.82272	LT	-1110	-1107	-1105	-5020	-5005	-4990	-2785	-2776	-2768
101408_at	P	A	A	A	526.083	405.609	646.558	199.1	91.4885	306.711	415.967	279.611	552.323	314.267	244.846	383.687	2.64231	0.378457	0.00483872	GT	1.26472	0.790686	0.306823	GT	1.674	0.597371	0.03587	GT	0.478644	2.08923	0.0673982	LT	0.633538	1.57844	0.149626	LT	1.32361	0.755509	0.246281	GT	-489	-487	-484	-429	-426	-422	1252	1261	1270
101409_at	P	P	P	P	1301.02	1032.91	1569.12	1179.43	769.786	1589.08	1121.97	1026.6	1217.34	1053.27	955.123	1151.41	1.10309	0.906547	0.590503	GT	1.15959	0.862377	0.42397	GT	1.23522	0.809572	0.242525	GT	1.05122	0.951276	0.907781	GT	1.11979	0.893028	0.656429	GT	1.06523	0.938768	0.385603	GT	-335	-334	-333	-1172	-1168	-1164	1407	1412	1416
101412_at	P	P	P	P	853.833	652.269	1055.4	1142.2	673.047	1611.35	1282.07	727.085	1837.05	690.733	219.898	1161.57	0.747534	1.33773	0.281159	LT	0.665982	1.50154	0.141426	LT	1.23613	0.808979	0.34491	GT	0.890905	1.12245	0.749864	LT	1.6536	0.604739	0.278222	GT	1.85609	0.538766	0.210071	GT	1085	1090	1094	12718	12797	12875	-2212	-2198	-2185
101414_at	P	A	P	P	1056.53	793.628	1319.44	562.967	274.209	851.724	528.267	365.303	691.23	1014.37	626.66	1402.07	1.87672	0.532843	0.0362735	GT	2	0.5	0.0172854	GT	1.04157	0.96009	0.885976	GT	1.06569	0.938362	0.938739	GT	0.554993	1.80182	0.115919	LT	0.520785	1.92018	0.0554789	LT	-870	-867	-863	-420	-418	-416	419	421	423
101415_i_at	P	A	A	A	151.133	111.246	191.021	161.667	125.249	198.084	141.067	85.312	196.821	130.767	49.81	211.723	0.934845	1.0697	0.672539	LT	1.07136	0.933392	0.858616	GT	1.15575	0.86524	0.546435	GT	1.14603	0.872577	0.52209	GT	1.2363	0.808866	0.4663	GT	1.07877	0.926985	0.714306	GT	53	54	54	1100	1109	1119	217	219	220
101416_f_at	P	P	P	P	1242.38	1091.33	1393.44	1535.83	1104.71	1966.96	1242.3	1180.27	1304.33	1217.73	1126.69	1308.78	0.808931	1.2362	0.164761	LT	1.00007	0.999933	0.926589	GT	1.02024	0.980159	0.899514	GT	1.23628	0.808877	0.257703	GT	1.26122	0.792881	0.224732	GT	1.02017	0.980225	0.67418	GT	133	133	133	942	945	948	649	651	653
101421_at	P	P	P	P	2581.85	1749.87	3413.83	1331.13	540.824	2121.44	1482.33	1107.36	1857.31	1602.47	1336.21	1868.72	1.93959	0.515573	0.182781	GT	1.74175	0.574136	0.283096	GT	1.61117	0.620666	0.374034	GT	0.897999	1.11359	0.610759	LT	0.830678	1.20384	0.459034	LT	0.925032	1.08104	0.591863	LT	-331	-330	-328	-3620	-3597	-3574	-790	-785	-780
101422_at	P	P	P	P	836.4	680.224	992.576	735.9	598.724	873.076	1265.1	928.38	1601.82	1654.17	1413.01	1895.32	1.13657	0.879842	0.517862	GT	0.661134	1.51255	0.0461881	LT	0.505632	1.97772	0.00318015	LT	0.581693	1.71912	0.031788	LT	0.444877	2.24781	0.00294003	LT	0.764796	1.30754	0.139979	LT	286	287	288	199	200	201	323	325	326
101424_at	A	P	A	P	51.1667	27.5496	74.7838	334.833	207.188	462.479	103.133	73.208	133.059	358.467	314.564	402.369	0.152812	6.54397	0.00070573	LT	0.496122	2.01564	0.0450543	LT	0.142738	7.00586	0.000341458	LT	3.24661	0.308014	0.0091333	GT	0.934071	1.07058	0.646998	LT	0.287707	3.47576	0.00130461	LT	-1299	-1290	-1281	1141	1153	1164	471	476	481
101425_at	P	P	A	A	1439.67	1171.49	1707.85	1990.3	1501.4	2479.2	1608.43	1288.91	1927.96	1606.67	1244.51	1968.82	0.723342	1.38247	0.0874478	LT	0.895074	1.11723	0.474248	LT	0.896058	1.116	0.499693	LT	1.23742	0.808136	0.26238	GT	1.23878	0.807248	0.27869	GT	1.0011	0.998902	0.980196	GT	-355	-354	-353	2268	2275	2283	-1785	-1779	-1774
101426_at	P	A	P	P	392.383	250.682	534.085	158.833	12.7667	304.9	343.4	307.434	379.366	208.4	68.9062	347.894	2.47041	0.404791	0.100351	GT	1.14264	0.875165	0.982326	GT	1.88284	0.531113	0.195209	GT	0.462532	2.16201	0.220413	LT	0.762156	1.31207	0.573054	LT	1.64779	0.606872	0.226071	GT	-413	-410	-407	-134	-132	-131	271	274	277
101429_at	P	P	P	P	474.317	285.844	662.789	2456.07	1073.8	3838.34	2261.7	980.45	3542.95	764.7	641.455	887.945	0.19312	5.17812	0.00531836	LT	0.209717	4.76833	0.00486065	LT	0.620265	1.61221	0.135187	LT	1.08594	0.920863	0.905566	GT	3.2118	0.311351	0.04149	GT	2.95763	0.338109	0.0276901	GT	79	80	81	308	311	315	261	264	266
101430_at	P	A	P	A	124.1	106.569	141.631	149.5	137.869	161.131	120.2	95.0961	145.304	124.633	78.8912	170.375	0.8301	1.20467	0.126557	LT	1.03245	0.968574	0.832136	GT	0.995721	1.0043	0.932186	LT	1.24376	0.804013	0.105809	GT	1.19952	0.833668	0.303974	GT	0.964429	1.03688	0.946813	LT	-1045	-1041	-1037	412	414	416	25249	25372	25495
101432_at	P	P	P	P	947.167	703.036	1191.3	750.467	672.589	828.344	948.333	652.717	1243.95	825.2	757.852	892.548	1.2621	0.792328	0.546696	GT	0.99877	1.00123	0.888629	LT	1.1478	0.87123	0.791097	GT	0.791353	1.26366	0.284243	LT	0.909436	1.09958	0.232082	LT	1.14922	0.870158	0.529385	GT	-753	-751	-749	-13597	-13536	-13475	-480	-478	-476
101435_at	A	P	P	A	183.833	152.743	214.924	419.767	213.028	626.506	314.933	255.888	373.979	245.067	205.145	284.988	0.437942	2.28341	0.00541916	LT	0.583721	1.71315	0.00569687	LT	0.750136	1.33309	0.0642385	LT	1.33287	0.750258	0.40195	GT	1.71287	0.583816	0.123508	GT	1.28509	0.778154	0.124008	GT	3206	3216	3225	4770	4791	4812	-461	-459	-457
101437_at	P	P	P	P	445.517	319.911	571.122	510.5	390.824	630.176	643.533	586.94	700.127	653.033	601.378	704.689	0.872706	1.14586	0.523189	LT	0.692298	1.44447	0.16812	LT	0.682227	1.46579	0.155813	LT	0.793277	1.26059	0.124117	LT	0.781737	1.2792	0.106201	LT	0.985453	1.01476	0.815669	LT	337	340	342	427	432	436	-447	-442	-438
101439_at	P	P	P	P	647.567	464.592	830.541	531.867	220.067	843.667	423.667	391.633	455.7	510.833	387.091	634.576	1.21754	0.821331	0.43208	GT	1.52848	0.654244	0.111925	GT	1.26767	0.788851	0.390343	GT	1.25539	0.796566	0.628286	GT	1.04117	0.960454	0.939934	GT	0.829364	1.20574	0.281833	LT	-897	-893	-889	1096	1103	1110	-374	-371	-369
101441_i_at	P	P	P	P	358.267	258.605	457.929	1616.33	411.767	2820.9	1051.57	372.808	1730.33	242.8	211.048	274.552	0.221654	4.51154	0.00936636	LT	0.340698	2.93515	0.0108687	LT	1.47556	0.677707	0.177322	GT	1.53707	0.650588	0.590958	GT	6.65706	0.150217	0.0246066	GT	4.331	0.230894	0.0123468	GT	443	445	448	896	903	909	-5493	-5452	-5412
101444_at	P	P	P	P	2076.53	1642.7	2510.37	3408.8	2811.11	4006.49	2929.13	2298.54	3559.73	3320.23	2830.74	3809.72	0.609168	1.64158	0.0143554	LT	0.708924	1.41059	0.0643758	LT	0.625418	1.59893	0.0166432	LT	1.16376	0.859286	0.325772	GT	1.02667	0.974018	0.846915	GT	0.882207	1.13352	0.378306	LT	531	532	533	-33216	-33099	-32982	-1311	-1307	-1302
101445_at	P	P	P	P	4894.38	3901.81	5886.96	3605.07	2600.01	4610.13	4417.33	3749.09	5085.57	5282.03	5058.37	5505.7	1.35764	0.736572	0.154481	GT	1.108	0.902531	0.656224	GT	0.92661	1.0792	0.539735	LT	0.816118	1.22531	0.241205	LT	0.682515	1.46517	0.0425775	LT	0.836294	1.19575	0.0916405	LT	-833	-831	-829	-3778	-3765	-3751	-97277	-96930	-96583
101447_at	P	A	P	P	299.517	203.12	395.913	328.967	291.233	366.7	346.167	198.019	494.314	427.1	328.5	525.7	0.910477	1.09833	0.553012	LT	0.865238	1.15575	0.62177	LT	0.70128	1.42596	0.174221	LT	0.950313	1.05228	0.98548	LT	0.770233	1.29831	0.128689	LT	0.810505	1.2338	0.415808	LT	657	660	664	606	610	614	-329	-327	-325
101448_at	P	P	P	P	4882.15	4064.23	5700.07	4518.2	3908.5	5127.9	4108.97	3581.42	4636.52	4793.23	4620.7	4965.77	1.08055	0.925453	0.662224	GT	1.18817	0.841631	0.289865	GT	1.01855	0.981787	0.996767	GT	1.0996	0.909426	0.381065	GT	0.94262	1.06087	0.425072	LT	0.857243	1.16653	0.0845328	LT	-1760	-1757	-1754	12662	12696	12729	9872	9898	9924
101449_at	P	P	P	P	880.467	763.056	997.878	832.5	393.824	1271.18	961.6	841.957	1081.24	1066.63	902.163	1231.1	1.05762	0.945521	0.582221	GT	0.915627	1.09215	0.412332	LT	0.825463	1.21144	0.127528	LT	0.865745	1.15508	0.501347	LT	0.780493	1.28124	0.346929	LT	0.901528	1.10923	0.379809	LT	2110	2115	2121	-6956	-6930	-6903	572	574	576
101450_at	P	P	P	P	4964.72	3932.09	5997.34	9126.9	3925.99	14327.8	3987.93	2770.73	5205.14	6742.13	6600.51	6883.76	0.543965	1.83835	0.063507	LT	1.24493	0.803255	0.306632	GT	0.736372	1.35801	0.0770791	LT	2.28863	0.436943	0.0857817	GT	1.35371	0.73871	0.499834	GT	0.591494	1.69063	0.0319259	LT	165	166	166	795	799	803	236	237	238
101455_at	P	P	P	P	361.133	267.9	454.367	804.333	580.549	1028.12	575.5	362.638	788.362	548.5	455.106	641.894	0.448985	2.22725	0.0251863	LT	0.627512	1.59359	0.164203	LT	0.658402	1.51883	0.141983	LT	1.39763	0.715499	0.236027	GT	1.46642	0.681931	0.0869079	GT	1.04923	0.953084	0.9586	GT	-808	-805	-802	-663	-660	-656	-564	-561	-558
101456_at	P	P	P	P	1232.68	788.959	1676.41	872.933	596.983	1148.88	1340.27	1105.27	1575.27	1366.57	1202.81	1530.32	1.41212	0.708157	0.483516	GT	0.91973	1.08728	0.601101	LT	0.902029	1.10861	0.55292	LT	0.651313	1.53536	0.0881595	LT	0.638778	1.56549	0.065533	LT	0.980755	1.01962	0.837161	LT	-10139	-10101	-10063	-441	-439	-436	-332	-330	-328
101457_at	P	A	P	P	356.833	271.219	442.448	162.967	44.6047	281.329	288.467	279.611	297.322	384.067	265.639	502.495	2.18961	0.456702	0.0313395	GT	1.237	0.808407	0.503768	GT	0.929092	1.07632	0.710546	LT	0.564941	1.7701	0.110454	LT	0.424319	2.35672	0.0655049	LT	0.751085	1.33141	0.199502	LT	740	743	746	-467	-464	-462	-154914	-154054	-153194
101458_at	P	P	P	P	1720.95	1088.5	2353.4	806.833	650.396	963.271	1689.77	1437.71	1941.82	1792.47	1557.19	2027.74	2.13297	0.46883	0.0998229	GT	1.01845	0.98188	0.797925	GT	0.960102	1.04156	0.670631	LT	0.477482	2.09432	0.00425602	LT	0.450125	2.22161	0.00270876	LT	0.942705	1.06078	0.596164	LT	47	47	48	1247	1255	1263	151	152	153
101459_at	P	P	P	P	1525.2	945.307	2105.09	2348.93	1115.6	3582.26	1963.63	1334.85	2592.41	2336.93	1622.09	3051.77	0.649316	1.54008	0.292557	LT	0.776723	1.28746	0.381567	LT	0.65265	1.53221	0.199246	LT	1.19622	0.835968	0.759091	GT	1.00513	0.994891	0.879847	GT	0.840261	1.19011	0.508756	LT	84	85	85	234	236	238	599	604	609
101461_f_at	P	P	P	P	2767.52	2260.02	3275.01	1477.9	1143.13	1812.67	1410.4	961.069	1859.73	2015.43	1768.73	2262.14	1.8726	0.534017	0.00418847	GT	1.96222	0.509627	0.0043331	GT	1.37316	0.728246	0.0627706	GT	1.04786	0.954327	0.773288	GT	0.733291	1.36371	0.0689371	LT	0.6998	1.42898	0.0858288	LT	727	729	731	-1058	-1054	-1050	-3235	-3224	-3213
101462_r_at	P	A	P	P	46.7	30.103	63.297	73.4	49.2802	97.5198	42.0333	24.6138	59.4529	49.1667	23.4092	74.9242	0.63624	1.57173	0.164087	LT	1.11102	0.900071	0.90375	GT	0.949831	1.05282	0.858674	LT	1.74623	0.572661	0.103684	GT	1.49288	0.669846	0.272092	GT	0.854915	1.16971	0.774955	LT	-722	-718	-715	148	149	150	931	938	944
101464_at	P	P	P	P	6094.65	5138.01	7051.29	6764.07	4938.78	8589.35	4899.67	4196.24	5603.09	4940.53	3959.33	5921.74	0.901033	1.10984	0.524029	LT	1.24389	0.803929	0.141417	GT	1.2336	0.810634	0.173769	GT	1.38052	0.724367	0.126398	GT	1.3691	0.730409	0.161717	GT	0.991728	1.00834	0.98494	LT	5248	5261	5273	-1599	-1594	-1588	-798	-795	-793
101465_at	P	P	P	P	216.217	78.7907	353.643	1556.57	868.564	2244.57	946.867	433.175	1460.56	2476.23	1628.11	3324.36	0.138906	7.19911	0.0010808	LT	0.22835	4.37925	0.00483553	LT	0.0873168	11.4526	0.000200747	LT	1.64391	0.608305	0.248569	GT	0.628603	1.59083	0.186256	LT	0.382382	2.61519	0.0317913	LT	-636	-631	-627	-688	-681	-674	424	428	432
101466_at	P	P	P	P	545.033	358.023	732.044	599.233	438.148	760.319	518.533	282.593	754.473	507.267	485.575	528.958	0.909551	1.09944	0.593728	LT	1.05111	0.951379	0.913569	GT	1.07445	0.930708	0.9861	GT	1.15563	0.865328	0.54373	GT	1.1813	0.846526	0.381351	GT	1.02221	0.978272	0.908103	GT	-2560	-2552	-2544	-1543	-1536	-1528	-388	-386	-384
101467_at	P	A	A	A	88.35	66.635	110.065	103.533	6.74594	200.321	99.2	87.4234	110.977	56	16.5033	95.4967	0.853348	1.17185	0.948313	LT	0.890625	1.12281	0.433713	LT	1.57768	0.633843	0.142357	GT	1.04368	0.958146	0.727542	GT	1.84881	0.540889	0.427602	GT	1.77143	0.564516	0.210499	GT	-505	-503	-500	-2465	-2447	-2430	2693	2712	2731
101469_at	P	A	P	P	631.117	526	736.233	201.533	126.231	276.836	435.833	211.595	660.072	305.767	291.674	319.859	3.13157	0.319328	0.000251556	GT	1.44807	0.690575	0.0741868	GT	2.06405	0.484485	0.000584458	GT	0.462409	2.16259	0.0721137	LT	0.659108	1.5172	0.0746135	LT	1.42538	0.701568	0.296744	GT	59	59	59	642	645	648	270	271	273
101470_at	P	A	P	P	106.483	67.4326	145.534	159.467	49.958	268.975	111.367	57.6936	165.04	151.667	81.0118	222.322	0.667747	1.49757	0.338269	LT	0.956151	1.04586	0.824746	LT	0.702088	1.42432	0.297947	LT	1.43191	0.69837	0.517213	GT	1.05143	0.951087	0.993268	GT	0.734286	1.36187	0.451027	LT	-590	-586	-583	295	298	300	-314	-311	-309
101475_at	P	P	P	P	7286.9	3815.35	10758.5	3730.33	1099.97	6360.7	6625.97	5865.73	7386.21	8127	5122	11132	1.95342	0.511923	0.344354	GT	1.09975	0.909298	0.803731	GT	0.896629	1.11529	0.591969	LT	0.562987	1.77624	0.168091	LT	0.459005	2.17863	0.133114	LT	0.815303	1.22654	0.477417	LT	318	321	323	195	197	200	-919	-909	-899
101476_at	P	P	P	P	3974.62	3093.9	4855.33	3087.6	3048.22	3126.98	4438.57	2717.4	6159.73	3918.83	2570.23	5267.44	1.28728	0.77683	0.201813	GT	0.895473	1.11673	0.681625	LT	1.01423	0.985965	0.948713	GT	0.69563	1.43755	0.238676	LT	0.787888	1.26922	0.275482	LT	1.13262	0.882905	0.726727	GT	-735	-733	-730	1057	1062	1068	1080	1085	1090
101480_at	P	P	P	P	691.05	509.125	872.975	781.967	606.342	957.591	689.167	649.326	729.008	706.8	623.693	789.907	0.883733	1.13156	0.522953	LT	1.00273	0.997275	0.829608	GT	0.977716	1.02279	0.75994	LT	1.13466	0.881325	0.422156	GT	1.10635	0.903875	0.543714	GT	0.975052	1.02559	0.747069	LT	-426	-425	-424	449	451	453	-1698	-1693	-1687
101481_at	P	P	P	P	306.517	260.024	353.009	614	557.352	670.648	409.833	375.65	444.017	658.7	483.675	833.725	0.499213	2.00315	0.000609463	LT	0.747906	1.33707	0.038374	LT	0.465336	2.14899	0.00152873	LT	1.49817	0.667481	0.00301052	GT	0.932139	1.0728	0.755072	LT	0.622185	1.60724	0.0412968	LT	853	855	857	-560	-558	-556	-882	-879	-876
101482_at	P	P	P	P	5840.73	4919.15	6762.32	3790.1	2819.95	4760.25	5596.93	4509.33	6684.53	4808.33	4554.97	5061.7	1.54105	0.648908	0.025672	GT	1.04356	0.958259	0.81078	GT	1.21471	0.823241	0.199928	GT	0.677174	1.47672	0.0756266	LT	0.788236	1.26866	0.142221	LT	1.16401	0.859101	0.222041	GT	2411	2416	2420	-964	-962	-959	929	931	934
101483_at	P	P	P	P	1825.83	1511.03	2140.64	1230.3	766.993	1693.61	1377	1167.87	1586.13	1283.43	1091.53	1475.34	1.48406	0.673829	0.0691936	GT	1.32595	0.754176	0.10387	GT	1.42262	0.70293	0.050138	GT	0.893464	1.11924	0.553203	LT	0.958601	1.04319	0.747744	LT	1.0729	0.93205	0.570323	GT	-583	-581	-579	-844	-841	-837	-1633	-1626	-1619
101484_at	P	P	P	P	1639.15	1275.07	2003.23	1706.3	731.399	2681.2	1810.43	1450.37	2170.5	1509.7	1053.27	1966.13	0.960646	1.04097	0.99192	LT	0.905391	1.1045	0.550195	LT	1.08575	0.921026	0.763634	GT	0.942482	1.06103	0.682914	LT	1.13022	0.88478	0.83005	GT	1.1992	0.833889	0.369509	GT	1909	1917	1924	3299	3318	3337	-449	-446	-444
101485_at	P	P	P	P	8836.9	7120.32	10553.5	12529.9	9835.48	15224.4	8472.17	7696.93	9247.4	7767.57	6573.46	8961.67	0.705263	1.41791	0.0498438	LT	1.04305	0.958726	0.868491	GT	1.13767	0.878992	0.443827	GT	1.47895	0.676154	0.0385919	GT	1.61311	0.619921	0.0278773	GT	1.09071	0.916834	0.376171	GT	-1466	-1463	-1460	-474	-472	-471	1200	1203	1207
101486_at	P	P	P	P	986.133	722.479	1249.79	7428.23	7116.46	7740.01	1190	974.248	1405.75	5826.63	5262.62	6390.65	0.132755	7.53269	8.65e-06	LT	0.828683	1.20673	0.286169	LT	0.169246	5.90857	2.18242e-05	LT	6.24221	0.1602	4.849e-05	GT	1.27488	0.78439	0.0104009	GT	0.204235	4.89633	0.000122467	LT	-546	-543	-541	10936	11004	11072	-1323	-1315	-1307
101487_f_at	P	P	A	P	1612.1	-209.348	3433.55	5845.03	1203.18	10486.9	343.967	275.429	412.505	1419.6	1229.99	1609.21	0.275807	3.62573	0.0876793	LT	4.68679	0.213366	0.802956	GT	1.1356	0.880591	0.325543	GT	16.993	0.0588477	0.013775	GT	4.11738	0.242873	0.134097	GT	0.242298	4.12714	0.00029399	LT	38882	39487	40092	4815	4923	5030	-601	-588	-575
101489_at	P	P	P	P	4214	3135.16	5292.84	3643.03	3278.76	4007.31	3519.57	2893.69	4145.44	5221.7	4706.91	5736.49	1.15673	0.864507	0.51895	GT	1.19731	0.835208	0.406553	GT	0.807017	1.23913	0.183554	LT	1.03508	0.966109	0.712607	GT	0.697672	1.43334	0.00702819	LT	0.674027	1.48362	0.0165083	LT	337	338	339	1200	1203	1206	305	306	307
101490_at	P	P	P	P	2178.88	1905.15	2452.62	1344.63	965.494	1723.77	1458.13	916.416	1999.85	1851.23	1582.31	2120.15	1.62043	0.61712	0.00701425	GT	1.4943	0.669211	0.0210327	GT	1.17699	0.849625	0.148139	GT	0.922161	1.08441	0.77895	LT	0.726345	1.37676	0.123437	LT	0.787655	1.26959	0.241956	LT	2110	2116	2121	1538	1544	1550	436	437	439
101492_at	P	P	P	P	547.7	442.891	652.509	1314.6	882.097	1747.1	862.9	724.282	1001.52	950.833	762.066	1139.6	0.416629	2.40022	0.00278928	LT	0.63472	1.5755	0.0293401	LT	0.576021	1.73605	0.0154787	LT	1.52347	0.656397	0.0885386	GT	1.38258	0.723287	0.179073	GT	0.90752	1.1019	0.52769	LT	-323	-322	-321	-654	-651	-648	1220	1225	1230
101494_at	P	P	P	P	557.2	492.374	622.026	524.067	354.239	693.894	564.867	444.91	684.823	587.033	454.973	719.094	1.06322	0.940536	0.581766	GT	0.986427	1.01376	0.928465	LT	0.949179	1.05354	0.681991	LT	0.927771	1.07785	0.673957	LT	0.892737	1.12015	0.558523	LT	0.96224	1.03924	0.821218	LT	1345	1349	1353	-1464	-1458	-1452	-941	-938	-934
101495_at	P	P	P	P	3693.17	3223.63	4162.7	1650.83	1217.08	2084.59	2449.37	1979.57	2919.16	2128.5	1841.31	2415.69	2.23715	0.446997	0.000314793	GT	1.5078	0.663216	0.0073746	GT	1.7351	0.576335	0.00086359	GT	0.673984	1.48372	0.0752495	LT	0.775585	1.28935	0.149947	LT	1.15075	0.869	0.334363	GT	-371	-370	-369	-2235	-2228	-2221	-1352	-1348	-1343
101498_at	P	P	P	P	1712.4	1027.21	2397.59	1182.27	488.196	1876.34	1825.97	1450.98	2200.95	1740.3	1385.81	2094.79	1.4484	0.690415	0.524743	GT	0.937805	1.06632	0.631884	LT	0.983968	1.01629	0.70931	LT	0.647474	1.54446	0.212817	LT	0.679346	1.472	0.248856	LT	1.04923	0.953084	0.754961	GT	414	416	418	-870	-864	-858	541	545	549
101499_at	P	P	P	P	2809.07	2321.42	3296.71	2445.13	1712.92	3177.35	2487.87	1712.66	3263.08	2233.6	1444.71	3022.49	1.14884	0.870443	0.433543	GT	1.12911	0.885656	0.490069	GT	1.25764	0.79514	0.228525	GT	0.982823	1.01748	0.950439	LT	1.09471	0.913488	0.696819	GT	1.11384	0.897797	0.663781	GT	-415	-414	-413	-852	-849	-845	4494	4514	4533
101500_at	P	A	P	A	544.483	488.566	600.4	401.833	322.88	480.787	621.433	453.525	789.342	568.6	506.837	630.363	1.355	0.738009	0.0232943	GT	0.876173	1.14133	0.348881	LT	0.957586	1.04429	0.614291	LT	0.646623	1.5465	0.0613602	LT	0.706707	1.41501	0.0343695	LT	1.09292	0.914981	0.636437	GT	-1645	-1641	-1638	42041	42168	42296	3291	3301	3310
101501_r_at	P	P	P	P	207.467	133.267	281.666	924.1	-228.521	2076.72	941.4	-37.7354	1920.54	479.6	305.317	653.883	0.224507	4.45421	0.0967825	LT	0.220381	4.5376	0.045006	LT	0.432583	2.3117	0.0311379	LT	0.981623	1.01872	0.875673	LT	1.92681	0.518991	0.808333	GT	1.96289	0.509454	0.61303	GT	688	695	702	415	421	427	-250	-246	-243
101502_at	P	P	P	P	3691.97	3338.16	4045.77	8608.57	7083.9	10133.2	9565.47	7474.59	11656.3	5721.4	5196.39	6246.41	0.428871	2.3317	3.69501e-05	LT	0.385968	2.59089	3.02628e-05	LT	0.645291	1.54969	0.000757103	LT	0.899963	1.11116	0.503521	LT	1.50463	0.664617	0.0159762	GT	1.67188	0.598131	0.0124508	GT	94	94	94	1035	1039	1043	466	468	469
101505_at	P	P	P	P	1804.48	1290.32	2318.65	1492.27	1047.84	1936.69	1866.2	1513.88	2218.52	1745.47	1602.49	1888.44	1.20922	0.826977	0.584895	GT	0.966929	1.0342	0.74052	LT	1.03381	0.967294	0.911208	GT	0.799628	1.25058	0.286351	LT	0.854939	1.16967	0.35101	LT	1.06917	0.935305	0.623287	GT	-398	-397	-396	6130	6156	6182	4838	4858	4878
101506_at	P	P	P	P	2244.58	1907.28	2581.89	2854.93	1742.34	3967.53	2341.03	1898	2784.06	2338.73	2199.85	2477.62	0.786212	1.27192	0.273545	LT	0.9588	1.04297	0.712732	LT	0.959743	1.04195	0.63142	LT	1.21952	0.819996	0.527139	GT	1.22072	0.81919	0.514679	GT	1.00098	0.999018	0.946291	GT	-902	-900	-898	-1177	-1174	-1170	956	959	962
101508_at	P	P	P	P	320.283	227.05	413.517	337.5	280.007	394.993	288.1	217.833	358.367	346.033	244.113	447.954	0.948988	1.05375	0.672303	LT	1.11171	0.899516	0.801283	GT	0.925585	1.0804	0.672721	LT	1.17147	0.85363	0.327345	GT	0.97534	1.02528	0.970623	LT	0.832579	1.20109	0.442355	LT	-880	-877	-874	-692	-689	-685	-511	-509	-506
101509_at	P	P	P	P	8075.08	5180.54	10969.6	8145.57	3866.55	12424.6	9957.4	9039.51	10875.3	9056.57	7121.37	10991.8	0.991347	1.00873	0.930998	LT	0.810963	1.2331	0.373086	LT	0.891627	1.12154	0.551337	LT	0.818042	1.22243	0.401184	LT	0.89941	1.11184	0.603803	LT	1.09947	0.909531	0.42189	GT	1332	1340	1348	274	276	278	-502	-498	-494
101510_at	P	P	P	P	2300.17	1404.13	3196.2	5268.43	3441.4	7095.47	1941.83	1561.23	2322.43	4081.53	3253.05	4910.02	0.436594	2.29046	0.0189502	LT	1.18453	0.844214	0.761097	GT	0.563555	1.77445	0.0532658	LT	2.71312	0.368579	0.0075249	GT	1.2908	0.774715	0.295714	GT	0.475761	2.1019	0.00768955	LT	-430	-428	-427	-1285	-1278	-1272	-1585	-1577	-1569
101513_at	P	P	P	P	203.85	178.185	229.515	234.5	191.528	277.472	206.667	156.039	257.295	217.3	138.211	296.389	0.869296	1.15036	0.264106	LT	0.986371	1.01382	0.945687	LT	0.938104	1.06598	0.848609	LT	1.13468	0.881308	0.447829	GT	1.07915	0.926652	0.665838	GT	0.951066	1.05145	0.925053	LT	-5122	-5105	-5087	318	320	321	-518	-515	-513
101514_at	P	P	P	P	2026.48	1819	2233.97	1440.03	1060.87	1819.2	1740.8	1543.27	1938.33	1658.27	1610.48	1706.05	1.40725	0.710607	0.0163667	GT	1.16411	0.859025	0.116486	GT	1.22205	0.818298	0.0357742	GT	0.827225	1.20886	0.220678	LT	0.868397	1.15155	0.288623	LT	1.04977	0.952589	0.480961	GT	-527	-526	-525	-1974	-1968	-1963	-2365	-2358	-2351
101515_at	P	A	P	A	428.483	359.176	497.791	436.633	297.931	575.336	483.6	373.041	594.159	347.667	284.895	410.438	0.981334	1.01902	0.951194	LT	0.886028	1.12863	0.427687	LT	1.23245	0.811389	0.183638	GT	0.902881	1.10757	0.607412	LT	1.2559	0.796244	0.31967	GT	1.39099	0.718914	0.108785	GT	-695	-693	-691	133	133	134	254	256	257
101516_at	P	P	P	A	486.433	321.194	651.672	170.833	48.8946	292.772	267.8	142.449	393.151	214.033	172.984	255.083	2.84741	0.351196	0.021926	GT	1.81641	0.550538	0.0595684	GT	2.2727	0.440005	0.0117309	GT	0.637914	1.56761	0.343204	LT	0.798162	1.25288	0.464091	LT	1.25121	0.799228	0.498457	GT	430	433	435	-331	-329	-327	-456	-453	-450
101517_at	P	P	P	P	2348.9	1671.54	3026.26	1573.3	718.883	2427.72	1527.47	1193.41	1861.52	1721.3	1304.09	2138.51	1.49298	0.669803	0.142866	GT	1.53777	0.65029	0.0998661	GT	1.36461	0.732811	0.225804	GT	1.03001	0.970868	0.929996	GT	0.914018	1.09407	0.635647	LT	0.887391	1.1269	0.522735	LT	-617	-615	-613	-1070	-1064	-1059	771	775	779
101518_at	P	P	P	P	702.517	552.699	852.335	525.533	360.077	690.99	448.8	377.799	519.801	551	404.853	697.147	1.33677	0.748072	0.198862	GT	1.56532	0.638846	0.0488599	GT	1.27498	0.784323	0.273373	GT	1.17097	0.85399	0.49235	GT	0.953781	1.04846	0.818307	LT	0.814519	1.22772	0.312769	LT	3865	3878	3891	480	482	484	1779	1788	1796
101519_at	P	P	P	P	9185.7	7768.48	10602.9	9613.5	8879.02	10348	9845.1	7953.6	11736.6	7546.6	6035.69	9057.51	0.9555	1.04657	0.632532	LT	0.933023	1.07179	0.587514	LT	1.2172	0.82156	0.200394	GT	0.976476	1.02409	0.887298	LT	1.27388	0.785	0.0896502	GT	1.30457	0.766534	0.136261	GT	-3171	-3167	-3162	-1767	-1764	-1760	753	754	756
101520_at	P	P	P	P	303.883	259.654	348.112	248.633	151.045	346.222	345.433	256.658	434.208	345.467	286.674	404.26	1.22221	0.818187	0.232072	GT	0.879716	1.13673	0.40013	LT	0.879631	1.13684	0.289354	LT	0.719772	1.38933	0.247477	LT	0.719703	1.38946	0.200325	LT	0.999904	1.0001	0.948135	LT	4410	4423	4437	-565	-563	-560	-248	-247	-246
101521_at	P	P	P	P	3763.02	2880.22	4645.81	3827.9	2356.52	5299.28	2970.27	1998.34	3942.19	3265.47	2983.65	3547.29	0.98305	1.01724	0.950636	LT	1.2669	0.789331	0.266007	GT	1.15237	0.867779	0.500546	GT	1.28874	0.775952	0.386278	GT	1.17224	0.85307	0.541292	GT	0.909599	1.09939	0.540819	LT	-3413	-3404	-3394	-728	-725	-723	2130	2138	2146
101522_at	A	P	A	P	76.7667	64.8585	88.6749	138.333	114.986	161.681	77.1	54.0704	100.13	112.167	102.36	121.973	0.55494	1.802	0.00319896	LT	0.995677	1.00434	0.974741	LT	0.684398	1.46114	0.0167809	LT	1.79421	0.557349	0.0343414	GT	1.23328	0.810843	0.113989	GT	0.68737	1.45482	0.0838254	LT	-177	-177	-176	270	271	272	-224	-223	-222
101523_at	P	P	P	P	13785.8	9344.33	18227.3	11916.1	7927.35	15904.8	14354	14024.4	14683.5	13795.1	12240.1	15350.1	1.15691	0.864373	0.688683	GT	0.96042	1.04121	0.671381	LT	0.999328	1.00067	0.801702	LT	0.830161	1.20459	0.310653	LT	0.863792	1.15769	0.422599	LT	1.04051	0.961065	0.511927	GT	888	891	894	248	249	250	-943	-938	-933
101524_at	P	P	P	P	116.4	70.6035	162.197	184.467	18.6684	350.265	143.3	95.6595	190.941	139.467	88.2568	190.677	0.631008	1.58477	0.524648	LT	0.812282	1.2311	0.46172	LT	0.834608	1.19817	0.518961	LT	1.28728	0.776834	0.966545	GT	1.32266	0.756053	0.916126	GT	1.02749	0.97325	0.891396	GT	-1102	-1095	-1087	248	250	253	2989	3017	3046
101525_at	P	P	P	P	5698.62	4130.34	7266.89	5170.43	4206.25	6134.62	4120.47	3557.59	4683.34	3966.77	3464.51	4469.02	1.10215	0.907314	0.786247	GT	1.383	0.723064	0.210791	GT	1.43659	0.696093	0.161638	GT	1.25482	0.796929	0.126008	GT	1.30344	0.767202	0.0829788	GT	1.03875	0.962698	0.720116	GT	-342	-341	-340	-1201	-1197	-1193	-2499	-2490	-2482
101526_at	P	P	P	P	992.117	760.706	1223.53	1270.2	404	2136.4	736.567	562.487	910.646	842.3	743.643	940.957	0.781071	1.28029	0.66472	LT	1.34695	0.742419	0.151047	GT	1.17787	0.848993	0.417155	GT	1.72449	0.579882	0.367235	GT	1.50801	0.663124	0.529412	GT	0.874471	1.14355	0.361492	LT	383	385	386	2764	2780	2797	574	578	581
101527_at	P	P	P	P	4535.17	3124.94	5945.4	3421.67	2307.79	4535.54	5222.6	5061.88	5383.32	5675.43	5364.33	5986.54	1.32543	0.754474	0.488237	GT	0.868373	1.15158	0.464936	LT	0.799087	1.25143	0.326194	LT	0.655165	1.52633	0.0703974	LT	0.602891	1.65868	0.0453454	LT	0.920212	1.08671	0.0629973	LT	-2558	-2547	-2536	410	413	415	-2969	-2951	-2933
101528_at	P	P	P	P	2466.6	1739.3	3193.9	2221.73	1476.51	2966.96	2858.3	2645.89	3070.71	3323.37	3097.67	3549.06	1.11021	0.900727	0.903434	GT	0.862961	1.1588	0.484915	LT	0.742199	1.34735	0.268838	LT	0.777292	1.28652	0.216836	LT	0.668519	1.49584	0.0875797	LT	0.860062	1.16271	0.0445876	LT	12793	12850	12907	402	405	408	-1834	-1823	-1811
101529_g_at	P	P	P	P	1890.7	1345.92	2435.48	1965.93	1220.49	2711.38	2473.67	2108.74	2838.6	2488.7	2320.08	2657.32	0.961731	1.03979	0.822548	LT	0.764331	1.30833	0.291513	LT	0.759714	1.31628	0.273993	LT	0.794745	1.25827	0.313093	LT	0.789944	1.26591	0.280104	LT	0.993959	1.00608	0.904317	LT	1846	1854	1862	295	297	299	572	576	579
101530_at	P	P	P	P	3621.75	2949.09	4294.41	4340	3066.67	5613.33	3388.63	2920.81	3856.46	3797.2	3255.36	4339.04	0.834505	1.19832	0.304647	LT	1.06879	0.935634	0.730694	GT	0.953795	1.04844	0.669487	LT	1.28075	0.780791	0.224775	GT	1.14295	0.874931	0.508316	GT	0.892403	1.12057	0.331901	LT	-969	-967	-965	-2340	-2334	-2327	-4681	-4668	-4655
101536_at	P	P	P	P	1767.92	1256.28	2279.55	1322.37	780.935	1863.8	1662.33	1609.25	1715.41	1832.8	1774.65	1890.95	1.33693	0.74798	0.304574	GT	1.06352	0.940278	0.969434	GT	0.964599	1.0367	0.691492	LT	0.795488	1.25709	0.242219	LT	0.721501	1.386	0.134892	LT	0.906991	1.10255	0.0129051	LT	589	591	593	318	319	321	-368	-367	-365
101540_at	P	P	P	P	2934.73	2469.03	3400.44	3168.47	2988.77	3348.16	3439.17	2942.28	3936.06	3233.1	3092.14	3374.06	0.926231	1.07964	0.486784	LT	0.853327	1.17188	0.248637	LT	0.907715	1.10167	0.398504	LT	0.921289	1.08544	0.398305	LT	0.980009	1.0204	0.602375	LT	1.06374	0.940082	0.516092	GT	-3773	-3765	-3758	-1811	-1806	-1801	55481	55634	55787
101542_f_at	P	P	P	P	1435.3	938.861	1931.74	1044.67	443.32	1646.01	1824.93	1214.78	2435.09	2016.3	1458.66	2573.94	1.37393	0.727839	0.422994	GT	0.786494	1.27146	0.386492	LT	0.711848	1.40479	0.242072	LT	0.572441	1.7469	0.175643	LT	0.518111	1.93009	0.116658	LT	0.90509	1.10486	0.661928	LT	-610	-606	-602	356	359	362	-301	-299	-296
101543_f_at	P	P	P	P	36608.3	30005.1	43211.4	33024.4	25209.3	40839.5	29245.8	24909.1	33582.5	29346.1	26040.8	32651.4	1.10852	0.902103	0.560303	GT	1.25174	0.798885	0.192315	GT	1.24747	0.801624	0.192914	GT	1.1292	0.885581	0.497473	GT	1.12534	0.888617	0.494621	GT	0.996583	1.00343	0.954302	LT	1656	1659	1663	-2577	-2570	-2562	5419	5435	5451
101546_at	P	A	P	P	233.667	189.871	277.462	242.6	191.095	294.105	378.1	280.008	476.192	243.267	222.474	264.06	0.963177	1.03823	0.771115	LT	0.618002	1.61812	0.0174713	LT	0.960537	1.04108	0.673523	LT	0.641629	1.55853	0.0627835	LT	0.99726	1.00275	0.917293	LT	1.55426	0.643392	0.0344338	GT	2038	2044	2050	350	351	353	739	742	745
101548_at	P	P	P	P	198.433	145.442	251.425	161.867	110.081	213.652	181.9	99.2731	264.527	247.667	184.737	310.596	1.22591	0.815723	0.581273	GT	1.09089	0.916681	0.819987	GT	0.801211	1.24811	0.361136	LT	0.889866	1.12376	0.755007	LT	0.653567	1.53007	0.119931	LT	0.734455	1.36155	0.258326	LT	-2331	-2323	-2314	1827	1837	1846	-4564	-4541	-4518
101551_s_at	P	P	P	P	778.083	616.359	939.808	1233.27	1120.8	1345.74	1090	875.25	1304.75	775.833	691.236	860.431	0.630912	1.58501	0.01884	LT	0.713838	1.40088	0.0746547	LT	1.0029	0.997108	0.892938	GT	1.13144	0.883832	0.299242	GT	1.5896	0.629088	0.00325592	GT	1.40494	0.711774	0.0431748	GT	-1288	-1285	-1283	-906	-903	-900	1117	1121	1124
101552_at	P	P	A	A	101.217	84.515	117.918	130.733	98.4476	163.019	88.9667	47.965	129.968	92.6667	48.5625	136.771	0.774222	1.29162	0.139411	LT	1.13769	0.878973	0.431158	GT	1.09227	0.915528	0.544075	GT	1.46946	0.68052	0.197799	GT	1.41079	0.708822	0.24571	GT	0.960072	1.04159	0.92338	LT	-910	-907	-904	542	545	547	-453	-451	-449
101554_at	P	A	P	P	1442.87	1237.6	1648.14	566.633	438.938	694.328	840.733	776.789	904.677	1119.73	1065.71	1173.76	2.54639	0.392714	0.000226909	GT	1.7162	0.582683	0.00256451	GT	1.28858	0.776048	0.0727309	GT	0.673975	1.48373	0.0276735	LT	0.506043	1.97612	0.00396836	LT	0.750834	1.33185	0.00333558	LT	91	92	92	-1747	-1740	-1733	402	404	406
101555_at	P	P	P	P	21797.7	15151	28444.4	14689.7	12649.6	16729.7	14217	10189.3	18244.8	14475.6	12453.6	16497.6	1.48388	0.67391	0.160891	GT	1.53321	0.652227	0.137408	GT	1.50583	0.664087	0.145546	GT	1.03324	0.967825	0.780328	GT	1.01479	0.985425	0.894331	GT	0.98214	1.01818	0.842268	LT	852	854	857	-413	-411	-410	2214	2222	2230
101557_at	P	P	P	P	1847.08	1214.59	2479.57	1445.03	948.829	1941.24	1405.6	1271.16	1540.04	1341.23	1170.87	1511.59	1.27823	0.782333	0.560806	GT	1.31409	0.760984	0.534245	GT	1.37715	0.726136	0.440068	GT	1.02805	0.972711	0.994312	GT	1.07739	0.928168	0.792898	GT	1.04799	0.954207	0.578665	GT	-273	-272	-271	-3697	-3681	-3664	80932	81303	81674
101558_s_at	P	P	P	P	8352.57	6829.3	9875.84	8888.7	8151.7	9625.7	8802.8	8442.26	9163.34	7807.37	7090	8524.73	0.939684	1.06419	0.607348	LT	0.948853	1.0539	0.637944	LT	1.06983	0.934727	0.798819	GT	1.00976	0.990336	0.868514	GT	1.1385	0.878347	0.110179	GT	1.1275	0.886919	0.0786267	GT	-355	-355	-354	1539	1543	1548	923	926	929
101561_at	P	P	P	P	16595.5	8072.77	25118.3	16181.6	-296.122	32659.3	18667.8	6143.35	31192.2	14922.1	6361.16	23483.1	1.02558	0.975056	0.713457	GT	0.888992	1.12487	0.719525	LT	1.11214	0.899166	0.886933	GT	0.866817	1.15365	0.63378	LT	1.0844	0.922169	0.84275	GT	1.25101	0.799351	0.665126	GT	-334	-332	-330	-236	-234	-231	-1956	-1939	-1922
101562_at	P	P	P	P	1773.97	1215.76	2332.17	1623.57	962.934	2284.2	2424.67	2026.37	2822.97	2197.33	2117.81	2276.86	1.09264	0.915218	0.872475	GT	0.731633	1.36681	0.225203	LT	0.807327	1.23866	0.334454	LT	0.669604	1.49342	0.141351	LT	0.73888	1.3534	0.195484	LT	1.10346	0.906241	0.366686	GT	-4494	-4479	-4464	-1800	-1792	-1784	979	984	988
101564_at	P	P	P	P	333.317	234.47	432.163	325.3	180.954	469.646	517.333	390.364	644.303	621.467	478.048	764.886	1.02464	0.975949	0.970704	GT	0.644298	1.55208	0.0891621	LT	0.536339	1.86449	0.0288012	LT	0.628802	1.59033	0.11046	LT	0.523439	1.91044	0.0463061	LT	0.832439	1.20129	0.324832	LT	-1606	-1599	-1592	1102	1109	1116	-408	-406	-403
101568_at	P	P	P	P	1201	1114.33	1287.67	1730.1	1721.1	1739.1	1781.5	1580.26	1982.74	1312.17	1260.63	1363.7	0.69418	1.44055	0.000307298	LT	0.674151	1.48335	0.000629442	LT	0.91528	1.09256	0.154611	LT	0.971148	1.02971	0.675616	LT	1.31851	0.758434	0.00017096	GT	1.35768	0.736552	0.00768732	GT	2528	2532	2536	-310	-309	-309	737	739	740
101573_f_at	P	P	P	P	36818.2	29358.4	44278	53106.4	32852.1	73360.7	35243.8	29076.5	41411.1	25568.5	22497.1	28639.9	0.693291	1.4424	0.117208	LT	1.04467	0.957239	0.870088	GT	1.43998	0.694453	0.0567879	GT	1.50683	0.663646	0.163487	GT	2.07702	0.481458	0.0307608	GT	1.37841	0.725474	0.0437559	GT	768	770	772	529	531	532	1337	1342	1346
101577_at	P	P	P	P	43953.6	34372	53535.3	51693	36142	67244.1	40869.7	35820.8	45918.5	37250.9	27858.6	46643.1	0.850281	1.17608	0.414885	LT	1.07546	0.929836	0.789159	GT	1.17994	0.847504	0.433533	GT	1.26483	0.790622	0.286117	GT	1.3877	0.720617	0.203764	GT	1.09715	0.911455	0.512033	GT	3220	3228	3236	8725	8756	8787	-678	-675	-673
101578_f_at	P	P	P	P	1334.27	-223.087	2891.62	4793.93	-730.352	10318.2	704	111.173	1296.83	821.833	213.392	1430.27	0.278324	3.59293	0.0791483	LT	1.89527	0.527631	0.630699	GT	1.62352	0.615944	0.926518	GT	6.80956	0.146852	0.103687	GT	5.83322	0.171432	0.0958838	GT	0.856621	1.16738	0.724166	LT	262	266	269	173	176	180	1540	1570	1600
101579_at	P	P	P	P	4217.23	3640.68	4793.79	2751.83	2134.71	3368.96	3754.83	3131.87	4377.8	5272.77	4877.59	5667.94	1.53252	0.652521	0.012325	GT	1.12315	0.890355	0.382642	GT	0.799814	1.25029	0.0671333	LT	0.732878	1.36448	0.0831217	LT	0.521896	1.91609	0.00472458	LT	0.712118	1.40426	0.019652	LT	-1178	-1176	-1173	9371	9400	9430	-818	-815	-812
101580_at	P	P	P	P	7392.28	5952.1	8832.47	7363.53	4527.19	10199.9	7429.87	5858.92	9000.81	5374.37	4237.76	6510.98	1.0039	0.996111	0.935393	GT	0.994942	1.00508	0.900335	LT	1.37547	0.727024	0.144629	GT	0.991072	1.00901	0.870392	LT	1.37012	0.729862	0.313744	GT	1.38246	0.723346	0.105003	GT	-1412	-1406	-1401	536	539	542	-617	-614	-610
101581_at	P	P	P	P	549.167	209.321	889.013	442.3	212.771	671.829	364.8	285.831	443.769	592.4	269.502	915.298	1.24162	0.805402	0.99214	GT	1.50539	0.664279	0.826865	GT	0.92702	1.07873	0.636944	LT	1.21245	0.82478	0.670168	GT	0.746624	1.33936	0.51138	LT	0.6158	1.6239	0.246556	LT	3639	3668	3697	1527	1544	1561	-370	-366	-362
101582_at	P	P	P	P	710.633	576.532	844.735	925.133	822.322	1027.94	986.067	930.363	1041.77	848.033	788.696	907.37	0.768142	1.30184	0.0887156	LT	0.720675	1.38759	0.0411183	LT	0.837978	1.19335	0.201371	LT	0.938206	1.06586	0.353058	LT	1.09092	0.916661	0.268574	GT	1.16277	0.860016	0.0297024	GT	-1571	-1568	-1565	-1668	-1663	-1659	-1073	-1070	-1067
101583_at	P	P	P	P	1087.65	982.692	1192.61	2717.27	2127.3	3307.23	1971.13	1132.54	2809.73	1342.13	1075.76	1608.51	0.400274	2.49829	4.25345e-05	LT	0.551789	1.81229	0.0171632	LT	0.810389	1.23398	0.0664677	LT	1.37853	0.72541	0.248842	GT	2.02459	0.493928	0.0092931	GT	1.46866	0.680894	0.270686	GT	-521	-519	-518	659	662	665	-1593	-1587	-1580
101584_at	P	P	P	P	1728.9	1467.56	1990.24	1217.13	918.348	1515.92	1454.67	1201.24	1708.1	1164.7	1093.67	1235.73	1.42047	0.703993	0.0319291	GT	1.18852	0.841383	0.208826	GT	1.48442	0.673665	0.00923757	GT	0.836709	1.19516	0.286315	LT	1.04502	0.956921	0.822075	GT	1.24896	0.800665	0.0864787	GT	-1039	-1036	-1034	4144	4156	4168	-844	-842	-840
101585_at	P	P	P	P	1557.45	1164.83	1950.07	1167.37	765.182	1569.55	1327.3	1125.48	1529.12	1539.47	1413.98	1664.95	1.33416	0.749537	0.253875	GT	1.1734	0.852226	0.554241	GT	1.01168	0.988453	0.885889	GT	0.879505	1.137	0.454264	LT	0.758293	1.31875	0.149522	LT	0.862182	1.15985	0.154246	LT	-24205	-24137	-24068	637	640	642	-1202	-1198	-1193
101587_at	P	P	P	A	3051.33	2420.19	3682.48	678.2	309.964	1046.44	1375.43	1077.82	1673.05	750.567	600.8	900.334	4.49916	0.222263	0.000225318	GT	2.21845	0.450765	0.0020627	GT	4.06537	0.24598	5.39979e-05	GT	0.493081	2.02806	0.0549235	LT	0.903584	1.1067	0.591605	LT	1.83253	0.545695	0.0177497	GT	20110	20211	20313	-1332	-1323	-1313	-467	-464	-461
101588_at	P	P	P	P	545.917	410.161	681.673	482.733	342.31	623.157	466.4	429.419	503.381	622.2	595.985	648.415	1.13089	0.884262	0.641831	GT	1.17049	0.854343	0.56024	GT	0.877397	1.13973	0.398901	LT	1.03502	0.966165	0.939976	GT	0.775849	1.28891	0.151087	LT	0.749598	1.33405	0.00333557	LT	-831	-829	-827	-1368	-1363	-1358	693	696	698
101589_at	P	P	P	P	5562.33	3804.05	7320.62	3817.67	2041.49	5593.84	4573.93	3513.86	5634.01	4492.57	4082.76	4902.37	1.457	0.686343	0.243933	GT	1.21609	0.822305	0.581172	GT	1.23812	0.807677	0.549374	GT	0.834657	1.1981	0.479903	LT	0.849774	1.17678	0.462077	LT	1.01811	0.982211	0.964581	GT	6027	6046	6065	1376	1382	1389	1182	1187	1193
101590_at	P	P	P	P	1282.83	891.53	1674.14	1300.07	154.346	2445.79	2003.8	1412.19	2595.41	2017.5	1229.99	2805.01	0.986744	1.01343	0.848743	LT	0.6402	1.56201	0.182099	LT	0.635853	1.57269	0.191744	LT	0.648801	1.54131	0.26979	LT	0.644395	1.55184	0.281119	LT	0.993209	1.00684	0.985433	LT	2259	2273	2288	694	700	707	-2101	-2082	-2063
101591_at	P	P	P	P	2112.15	1483.13	2741.17	2743.6	1877.57	3609.63	1896.2	1358.74	2433.66	1993.8	1374.02	2613.58	0.769846	1.29896	0.276957	LT	1.11389	0.897758	0.770787	GT	1.05936	0.943967	0.92315	GT	1.44689	0.691136	0.183986	GT	1.37607	0.726709	0.230617	GT	0.951048	1.05147	0.83084	LT	-344	-343	-342	756	759	762	-347	-345	-344
101593_at	P	P	P	P	2023.85	1212.07	2835.63	765.2	647.162	883.238	921	728.766	1113.23	893.267	799.871	986.663	2.64486	0.378091	0.00642961	GT	2.19745	0.455073	0.0196707	GT	2.26567	0.44137	0.0150756	GT	0.830836	1.20361	0.237145	LT	0.856631	1.16736	0.167275	LT	1.03105	0.969888	0.859183	GT	1054	1058	1061	-304	-303	-301	1351	1358	1364
101595_at	P	P	P	P	158.117	122.694	193.539	197.467	183.721	211.213	176.733	131.602	221.865	261.033	182.534	339.533	0.800726	1.24887	0.193826	LT	0.894662	1.11774	0.523669	LT	0.605734	1.65089	0.0429659	LT	1.11731	0.895003	0.384476	GT	0.756481	1.32191	0.204455	LT	0.677053	1.47699	0.138511	LT	-544	-543	-542	1236	1240	1244	-856	-853	-850
101603_g_at	P	A	A	P	137.4	121.487	153.313	172.8	129.089	216.511	134.867	109.594	160.139	189.867	129.434	250.299	0.795139	1.25764	0.116772	LT	1.01878	0.981562	0.853973	GT	0.723666	1.38185	0.0749075	LT	1.28127	0.780478	0.231942	GT	0.910112	1.09877	0.736897	LT	0.710323	1.40781	0.193282	LT	-979	-976	-973	1188	1193	1198	-395	-393	-392
101607_at	P	P	P	P	317.017	272.604	361.43	210.8	168.606	252.994	419.533	299.877	539.189	284.567	231.049	338.084	1.50387	0.664949	0.0147471	GT	0.755641	1.32338	0.0940119	LT	1.11403	0.897639	0.429408	GT	0.502463	1.9902	0.0174162	LT	0.740775	1.34994	0.098315	LT	1.47429	0.678293	0.0911661	GT	82	82	82	547	549	551	195	196	196
101617_s_at	P	P	P	P	480.433	349.422	611.445	495.067	431.933	558.201	479.133	312.441	645.826	572.7	506.403	638.997	0.970442	1.03046	0.736655	LT	1.00271	0.997294	0.920274	GT	0.838892	1.19205	0.405342	LT	1.03325	0.967816	0.772242	GT	0.864443	1.15681	0.17579	LT	0.836622	1.19528	0.365146	LT	-615	-613	-611	-1716	-1708	-1701	-1149	-1144	-1139
101618_r_at	P	P	P	P	797.633	712.04	883.227	793.367	646.79	939.943	771.9	632.63	911.17	777.567	678.174	876.959	1.00538	0.994651	0.946298	GT	1.03334	0.967738	0.735349	GT	1.02581	0.974842	0.803287	GT	1.02781	0.972942	0.841668	GT	1.02032	0.980085	0.89358	GT	0.992712	1.00734	0.923175	LT	463	464	464	1438	1442	1447	1043	1046	1050
101621_at	P	P	P	P	438.35	369.186	507.514	535.2	520.882	549.518	498.3	410.733	585.867	633.8	532.008	735.592	0.81904	1.22094	0.107711	LT	0.879691	1.13676	0.334152	LT	0.691622	1.44588	0.0211595	LT	1.07405	0.931054	0.438953	GT	0.84443	1.18423	0.116918	LT	0.78621	1.27192	0.117864	LT	-773	-772	-770	2072	2078	2084	-3812	-3801	-3790
101625_at	P	P	P	P	121.75	105.344	138.156	154.9	85.4514	224.349	107.233	60.4747	153.992	155.5	125.518	185.482	0.785991	1.27228	0.278842	LT	1.13537	0.880767	0.380421	GT	0.782958	1.27721	0.0861463	LT	1.44451	0.692275	0.288971	GT	0.996141	1.00387	0.869031	LT	0.689603	1.45011	0.154529	LT	-1099	-1095	-1092	6053	6080	6106	-368	-367	-365
101632_at	A	A	A	P	134.233	109.822	158.645	200	88.7658	311.234	150.833	107.106	194.561	174.8	155.627	193.973	0.671167	1.48994	0.299026	LT	0.889945	1.12367	0.501598	LT	0.767925	1.30221	0.087202	LT	1.32597	0.754167	0.651155	GT	1.14416	0.874	0.949104	GT	0.862891	1.1589	0.3407	LT	-840	-837	-834	296	297	299	340	342	343
101634_at	P	P	P	P	16761.5	11408.2	22114.8	24573.1	12527.3	36618.8	17171.9	15555.9	18787.9	15593.8	12565.6	18622.1	0.682109	1.46604	0.266068	LT	0.976101	1.02448	0.726745	LT	1.07488	0.930335	0.944967	GT	1.431	0.69881	0.399082	GT	1.57582	0.63459	0.284032	GT	1.1012	0.908102	0.412389	GT	1138	1142	1147	388	390	393	-626	-622	-618
101658_f_at	A	P	A	A	145.967	95.2464	196.687	686.533	583.795	789.271	288.4	186.7	390.1	490.533	445.679	535.388	0.212614	4.70336	0.000687538	LT	0.506126	1.97579	0.0500469	LT	0.297567	3.36058	0.00236815	LT	2.38049	0.420082	0.0145144	GT	1.39957	0.714508	0.0222026	GT	0.587932	1.70088	0.052583	LT	-329	-327	-325	-1650	-1634	-1618	-520	-515	-510
101661_r_at	A	A	P	P	49.3333	32.0396	66.627	59.2333	8.93131	109.535	46.6333	24.1252	69.1414	47.2333	36.0528	58.4139	0.832864	1.20068	0.85871	LT	1.0579	0.94527	0.867567	GT	1.04446	0.957432	0.938378	GT	1.27019	0.787282	0.82134	GT	1.25406	0.797411	0.917765	GT	0.987297	1.01287	0.819639	LT	1346	1356	1366	3867	3906	3945	-285	-282	-280
101664_at	P	P	P	P	39887.1	34073.5	45700.6	48936.3	34232.3	63640.4	36014.1	31510.7	40517.5	30896.2	28810.2	32982.3	0.81508	1.22687	0.217499	LT	1.10754	0.902901	0.456527	GT	1.291	0.774593	0.0665896	GT	1.35881	0.735937	0.142557	GT	1.58389	0.631356	0.0423894	GT	1.16565	0.857893	0.106284	GT	721	723	724	1380	1384	1388	-2330	-2323	-2317
101665_at	A	P	P	P	1768.12	1665.14	1871.1	2446.33	1829.62	3063.05	1960.13	1747.75	2172.52	2046.8	1736.56	2357.04	0.722762	1.38358	0.0145421	LT	0.902039	1.1086	0.111806	LT	0.863844	1.15762	0.0684548	LT	1.24804	0.801254	0.218153	GT	1.1952	0.836681	0.332979	GT	0.957657	1.04421	0.691537	LT	5010	5021	5031	477	479	480	-12306	-12269	-12232
101680_at	P	P	P	P	18568.4	11535.2	25601.6	29160.6	22730	35591.2	20013.6	16074	23953.2	15986.6	14458.6	17514.5	0.636764	1.57044	0.237236	LT	0.92779	1.07783	0.623945	LT	1.1615	0.860955	0.954651	GT	1.45704	0.686323	0.0794928	GT	1.82407	0.548225	0.0104474	GT	1.2519	0.798785	0.135445	GT	-234	-233	-232	-3068	-3050	-3033	-1500	-1491	-1483
101681_f_at	P	P	P	P	942.567	621.394	1263.74	1505.5	763.546	2247.45	1475.43	1131.66	1819.2	1594.87	1478.39	1711.34	0.626082	1.59723	0.1591	LT	0.638841	1.56534	0.111075	LT	0.591	1.69205	0.0630326	LT	1.02038	0.980029	0.931137	GT	0.943966	1.05936	0.654898	LT	0.925114	1.08095	0.495627	LT	-421	-419	-418	-435	-433	-430	-3099	-3083	-3067
101684_r_at	P	P	P	P	702.733	562.063	843.403	647.267	443.536	850.998	644.233	429.165	859.302	751.033	670.947	831.119	1.08569	0.92107	0.696293	GT	1.09081	0.916754	0.678103	GT	0.935689	1.06873	0.596295	LT	1.00471	0.995314	0.988322	GT	0.861835	1.16032	0.388608	LT	0.857796	1.16578	0.357263	LT	-1381	-1376	-1372	922	926	930	-715	-711	-708
101687_r_at	P	A	A	A	38.1833	31.8294	44.5372	68.6	10.1823	127.018	50.7333	12.7955	88.6712	42.7	33.9868	51.4132	0.556608	1.7966	0.28821	LT	0.752628	1.32868	0.571442	LT	0.894223	1.11829	0.477396	LT	1.35217	0.739553	0.723297	GT	1.60656	0.622449	0.605995	GT	1.18813	0.841656	0.912974	GT	480	484	488	130	132	133	177	179	181
101694_f_at	P	A	A	P	196	132.597	259.403	257.967	58.4589	457.474	161	119.145	202.855	206.2	138.813	273.587	0.759788	1.31616	0.578691	LT	1.21739	0.821429	0.663539	GT	0.950533	1.05204	0.731924	LT	1.60228	0.624112	0.423016	GT	1.25105	0.799328	0.799618	GT	0.780795	1.28075	0.318834	LT	182	183	184	188	189	190	758	763	769
101697_f_at	P	P	P	P	904.717	748.115	1061.32	1508.77	1257.7	1759.83	1060.57	941.688	1179.45	982.6	880.919	1084.28	0.59964	1.66767	0.00710992	LT	0.85305	1.17226	0.228446	LT	0.920737	1.08609	0.477078	LT	1.4226	0.702936	0.0277787	GT	1.53548	0.65126	0.0136088	GT	1.07935	0.926486	0.377541	GT	278	279	280	-3024	-3012	-3000	547	549	551
101698_f_at	P	A	A	P	328.8	299.718	357.882	326.5	232.811	420.189	357.2	211.974	502.426	392.033	289.293	494.774	1.00704	0.993005	0.839903	GT	0.920493	1.08637	0.803503	LT	0.838704	1.19232	0.207659	LT	0.914054	1.09403	0.81783	LT	0.832837	1.20071	0.434347	LT	0.911147	1.09752	0.674178	LT	3389	3399	3408	-907	-903	-900	-302	-300	-299
101712_at	P	P	P	P	481.35	412.543	550.157	537.933	457.013	618.854	490.833	336.36	645.306	598.333	512.046	684.62	0.894813	1.11755	0.341391	LT	0.980679	1.0197	0.96964	LT	0.804485	1.24303	0.0929428	LT	1.09596	0.912443	0.568418	GT	0.899053	1.11228	0.379159	LT	0.820334	1.21902	0.292266	LT	-1284	-1281	-1279	4116	4128	4140	-610	-608	-607
101724_at	P	A	A	A	174.1	129.253	218.947	231.933	173.766	290.101	132.6	100.553	164.647	198.3	125.73	270.87	0.750647	1.33218	0.186071	LT	1.31297	0.761631	0.295689	GT	0.877963	1.139	0.558501	LT	1.74912	0.571716	0.0343415	GT	1.16961	0.854987	0.473446	GT	0.668684	1.49548	0.153019	LT	-565	-563	-561	-1578	-1570	-1562	-296	-294	-293
101732_at	P	A	P	P	332.283	295.675	368.892	269.067	148.167	389.966	277.467	186.628	368.306	412.633	311.041	514.225	1.23495	0.809751	0.163216	GT	1.19756	0.83503	0.191996	GT	0.805275	1.24181	0.112262	LT	0.969726	1.03122	0.867805	LT	0.652072	1.53357	0.137054	LT	0.672429	1.48715	0.12935	LT	1011	1014	1018	-423	-421	-419	-218	-217	-216
101741_at	P	P	P	P	1687.17	1390.11	1984.22	1972.7	1690.29	2255.11	1814.9	1757.16	1872.64	1458.47	1213.99	1702.95	0.855258	1.16924	0.269985	LT	0.92962	1.07571	0.514447	LT	1.15681	0.864447	0.400534	GT	1.08695	0.920008	0.340414	GT	1.35258	0.739325	0.0525786	GT	1.24439	0.803607	0.0618675	GT	-580	-579	-578	2372	2378	2385	-3050	-3041	-3033
101757_at	P	P	P	P	966.583	610.595	1322.57	947.067	714.943	1179.19	1217.33	903.178	1531.49	1309.57	1038.64	1580.49	1.02061	0.979809	0.783576	GT	0.794017	1.25942	0.436136	LT	0.738094	1.35484	0.349667	LT	0.777985	1.28537	0.260073	LT	0.723191	1.38276	0.1332	LT	0.92957	1.07577	0.67601	LT	-1305	-1299	-1293	3515	3540	3564	569	573	577
101759_at	P	P	P	P	100.4	78.2903	122.51	135.033	60.0253	210.041	92.3	40.0247	144.575	110.033	85.1566	134.91	0.74352	1.34495	0.326597	LT	1.08776	0.919323	0.612884	GT	0.912451	1.09595	0.580162	LT	1.46298	0.683535	0.377011	GT	1.2272	0.814861	0.640766	GT	0.838837	1.19213	0.484927	LT	775	779	783	-603	-598	-594	-541	-537	-533
101763_at	P	A	P	P	1474.8	1357.77	1591.83	1518.8	1334.16	1703.44	1415.73	1161.04	1670.43	1590.83	1363.87	1817.8	0.97103	1.02983	0.70483	LT	1.04172	0.959949	0.623494	GT	0.927061	1.07868	0.379235	LT	1.0728	0.932139	0.543235	GT	0.95472	1.04743	0.670527	LT	0.889932	1.12368	0.371417	LT	1598	1601	1604	-2662	-2655	-2647	-3009	-3001	-2993
101764_at	P	P	P	P	349.833	279.081	420.585	466.333	440.948	491.718	309.033	281.361	336.706	428.8	328.45	529.15	0.750179	1.33302	0.0746937	LT	1.13202	0.883373	0.529058	GT	0.815843	1.22573	0.242716	LT	1.50901	0.662688	0.00146684	GT	1.08753	0.919514	0.478288	GT	0.720693	1.38755	0.0725007	LT	-820	-818	-816	670	673	675	-516	-514	-512
101771_r_at	P	P	A	A	3243.58	2467	4020.16	3510.5	1310.97	5710.03	3376.67	2369.3	4384.03	3668.63	2664.33	4672.94	0.923966	1.08229	0.952284	LT	0.960587	1.04103	0.807398	LT	0.884139	1.13104	0.504843	LT	1.03963	0.961876	0.872811	GT	0.956896	1.04505	0.718405	LT	0.920415	1.08647	0.694068	LT	-3440	-3426	-3413	-707	-703	-699	3041	3058	3075
101781_f_at	P	P	P	P	1251.88	1020.55	1483.21	1027.57	608.645	1446.49	1232.27	1113.05	1351.49	1160.07	1055.43	1264.7	1.2183	0.820817	0.323044	GT	1.01592	0.98433	0.96401	GT	1.07915	0.926657	0.745285	GT	0.833883	1.19921	0.334994	LT	0.885782	1.12895	0.46993	LT	1.06224	0.941409	0.417176	GT	-1204	-1201	-1198	-2111	-2103	-2095	-6443	-6419	-6395
101787_f_at	P	P	P	P	26562.2	20170.4	32954	27273.7	12897.2	41650.2	24643	22147.5	27138.5	21574.8	20115.8	23033.8	0.973913	1.02679	0.934881	LT	1.07788	0.927746	0.824392	GT	1.23117	0.812237	0.361237	GT	1.10675	0.903543	0.954767	GT	1.26415	0.791048	0.649601	GT	1.14221	0.875495	0.0990656	GT	510	511	513	3849	3865	3880	4930	4949	4968
101789_i_at	A	P	A	P	89.3333	56.4328	122.234	869.7	502.331	1237.07	381.733	30.2441	733.223	617.333	410.367	824.3	0.102717	9.73545	0.000362328	LT	0.23402	4.27313	0.0396086	LT	0.144708	6.91045	0.000710589	LT	2.27829	0.438925	0.162299	GT	1.4088	0.709823	0.318724	GT	0.618359	1.61718	0.287072	LT	180	182	184	-1467	-1450	-1432	-783	-773	-764
101790_f_at	A	P	A	P	78.85	55.5995	102.1	419.133	306.189	532.078	183.4	55.7468	311.053	324.533	264.983	384.084	0.188126	5.31558	0.000723143	LT	0.429935	2.32594	0.0631683	LT	0.242964	4.11583	0.00158476	LT	2.28535	0.43757	0.0625461	GT	1.2915	0.774296	0.204054	GT	0.565119	1.76954	0.125131	LT	513	516	520	-651	-645	-638	1114	1125	1137
101791_f_at	A	P	A	A	305.333	243.306	367.361	726	718.962	733.038	452.9	245.102	660.698	627.667	527.872	727.461	0.420569	2.37773	0.000576848	LT	0.674174	1.4833	0.120914	LT	0.486458	2.05568	0.00229994	LT	1.603	0.623829	0.0783773	GT	1.15666	0.864555	0.125175	GT	0.721561	1.38588	0.190377	LT	-644	-642	-640	-695	-692	-689	-2220	-2210	-2200
101795_f_at	P	A	P	A	275.433	219.982	330.885	368.633	262.186	475.081	287.8	200.671	374.929	279.233	127.137	431.33	0.747174	1.33838	0.172945	LT	0.95703	1.0449	0.822245	LT	0.986391	1.0138	0.832317	LT	1.28087	0.780722	0.34736	GT	1.32016	0.757483	0.403226	GT	1.03068	0.970234	0.794212	GT	-4500	-4486	-4471	294	295	296	-495	-493	-490
101805_f_at	P	P	P	P	365.767	254.673	476.861	699.367	473.84	924.893	814.533	389.825	1239.24	454.7	401.807	507.593	0.522997	1.91206	0.0800408	LT	0.449051	2.22692	0.0683035	LT	0.804413	1.24314	0.384049	LT	0.85861	1.16467	0.765163	LT	1.53808	0.65016	0.0771128	GT	1.79136	0.558234	0.148604	GT	186	187	188	312	314	316	283	285	287
101806_at	P	A	P	P	555.133	455.351	654.916	595.233	440.492	749.975	479.2	373.248	585.152	605.933	417.342	794.525	0.932631	1.07223	0.678157	LT	1.15846	0.863216	0.392784	GT	0.916162	1.09151	0.662326	LT	1.24214	0.805062	0.31125	GT	0.982341	1.01798	0.969688	LT	0.790846	1.26447	0.34629	LT	-1062	-1059	-1056	-5443	-5425	-5406	-298	-297	-296
101830_at	P	P	P	P	245.583	215.815	275.351	237.167	184.539	289.794	307.733	205.97	409.496	295.8	227.108	364.492	1.03549	0.965728	0.752244	GT	0.798039	1.25307	0.228527	LT	0.830234	1.20448	0.184481	LT	0.770689	1.29754	0.334019	LT	0.80178	1.24722	0.262528	LT	1.04034	0.961222	0.928693	GT	-1317	-1314	-1310	10858	10901	10943	897	901	904
101834_at	P	P	P	P	487.4	363.387	611.413	279.033	116.79	441.277	527.367	327.076	727.657	347.433	227.142	467.724	1.74674	0.572494	0.0977752	GT	0.924215	1.082	0.736611	LT	1.40286	0.71283	0.259171	GT	0.529107	1.88998	0.15008	LT	0.803128	1.24513	0.490871	LT	1.51789	0.658808	0.207228	GT	-316	-315	-313	-469	-466	-464	1073	1079	1085
101835_at	P	A	A	A	717.267	501.494	933.04	527.7	368.516	686.884	723.8	661.148	786.452	731	467.224	994.776	1.35923	0.73571	0.444432	GT	0.990974	1.00911	0.767853	LT	0.981213	1.01915	0.831319	LT	0.729069	1.37161	0.0926932	LT	0.721888	1.38526	0.240702	LT	0.99015	1.00995	0.916352	LT	-420	-418	-416	1614	1624	1633	-6100	-6066	-6031
101836_at	P	P	P	P	199.633	146.397	252.87	153.433	118.404	188.463	134.567	103.323	165.811	213.367	149.726	277.007	1.30111	0.768576	0.297828	GT	1.48353	0.674069	0.123049	GT	0.935635	1.06879	0.708001	LT	1.1402	0.877037	0.500351	GT	0.719106	1.39061	0.191176	LT	0.630683	1.58558	0.0916186	LT	1736	1741	1747	-514	-512	-510	201	201	202
101837_g_at	P	P	P	P	1938.5	1259.21	2617.79	1648.03	909.888	2386.18	2341.13	2198.29	2483.98	2286.27	2173.75	2398.78	1.17625	0.850159	0.917262	GT	0.828018	1.2077	0.459715	LT	0.847889	1.1794	0.489177	LT	0.703947	1.42056	0.137155	LT	0.72084	1.38727	0.154597	LT	1.024	0.976564	0.588011	GT	-798	-795	-792	-615	-611	-607	-1177	-1170	-1163
101838_r_at	P	A	A	P	451.1	334.918	567.282	490.133	343.507	636.76	511.433	449.012	573.855	541.7	464.344	619.056	0.920362	1.08653	0.655424	LT	0.882031	1.13375	0.474028	LT	0.832749	1.20084	0.353759	LT	0.958352	1.04346	0.719204	LT	0.904806	1.10521	0.508334	LT	0.944127	1.05918	0.580822	LT	-856	-853	-851	-805	-802	-799	-393	-392	-390
101843_at	P	A	A	A	666.067	526.581	805.553	380.467	54.6289	706.304	569.8	510.799	628.801	501.067	353.151	648.982	1.75066	0.571214	0.0576961	GT	1.16895	0.85547	0.46772	GT	1.3293	0.752277	0.193075	GT	0.66772	1.49763	0.229442	LT	0.759313	1.31698	0.379926	LT	1.13717	0.879373	0.414357	GT	2269	2279	2290	-833	-827	-821	574	578	581
101844_at	P	P	P	P	86.55	65.587	107.513	164.133	119.256	209.011	117.8	67.2701	168.33	147.1	90.2606	203.939	0.527315	1.8964	0.0256231	LT	0.73472	1.36106	0.290206	LT	0.588375	1.6996	0.0754371	LT	1.39332	0.717709	0.242207	GT	1.11579	0.896223	0.616316	GT	0.800816	1.24873	0.491972	LT	-590	-588	-585	496	499	502	-205	-204	-203
101845_s_at	A	P	A	P	19.2	6.90669	31.4933	241.3	197.946	284.654	25.5	13.2282	37.7718	262.9	235.012	290.788	0.079569	12.5677	0.00137274	LT	0.752941	1.32812	0.370526	LT	0.0730316	13.6927	0.00111798	LT	9.46275	0.105678	0.000745982	GT	0.917839	1.08952	0.452478	LT	0.0969951	10.3098	0.000525224	LT	-13458	-13324	-13190	-1543	-1521	-1500	-57072	-56275	-55477
101846_r_at	A	P	A	P	84.1167	54.9186	113.315	278.2	188.364	368.036	73.7	22.1634	125.237	305.3	239.258	371.342	0.30236	3.30731	0.00365708	LT	1.14134	0.876164	0.643143	GT	0.275521	3.62948	0.00183778	LT	3.77476	0.264917	0.0198587	GT	0.911235	1.09741	0.61625	LT	0.241402	4.14247	0.0126462	LT	172	173	174	-8132	-8059	-7985	-135	-134	-133
101847_at	A	P	A	P	39.8167	21.5275	58.1059	284.6	192.103	377.097	102.633	59.8585	145.408	272.867	203.328	342.406	0.139904	7.14776	0.00216097	LT	0.387951	2.57765	0.0529725	LT	0.14592	6.85308	0.00210354	LT	2.77298	0.360623	0.0272981	GT	1.043	0.958773	0.907341	GT	0.37613	2.65866	0.0218459	LT	178	179	181	1105	1119	1132	-889	-878	-868
101848_g_at	A	P	P	P	57.4167	37.8767	76.9566	541.6	308.545	774.655	137.133	93.602	180.665	502.267	365.927	638.607	0.106013	9.4328	0.000163822	LT	0.418692	2.38839	0.0144511	LT	0.114315	8.74775	8.81653e-05	LT	3.94944	0.2532	0.0115996	GT	1.07831	0.927376	0.907411	GT	0.273029	3.66262	0.00381541	LT	-373	-370	-368	1270	1282	1294	-4451	-4411	-4370
101850_at	P	A	P	P	82.0333	65.9264	98.1403	75.7	36.0591	115.341	52.9333	48.7659	57.1008	86.3	66.4086	106.191	1.08366	0.922796	0.618595	GT	1.54975	0.645266	0.0375369	GT	0.95056	1.05201	0.732899	LT	1.4301	0.699251	0.323641	GT	0.877173	1.14003	0.554708	LT	0.613364	1.63035	0.0227849	LT	-724	-721	-718	124	124	125	-378	-376	-374
101854_r_at	P	P	P	P	1000.2	876.53	1123.87	970.033	837.524	1102.54	811.433	657.492	965.374	965.333	800.259	1130.41	1.0311	0.969839	0.814088	GT	1.23263	0.811271	0.104435	GT	1.03612	0.96514	0.771471	GT	1.19546	0.8365	0.190699	GT	1.00487	0.995155	0.946962	GT	0.840573	1.18966	0.251342	LT	-962	-960	-958	-984	-981	-978	-1809	-1803	-1798
101856_at	P	P	P	P	387.783	202.016	573.551	344.467	189.033	499.9	480.067	373.367	586.767	395.733	310.703	480.764	1.12575	0.888297	0.892672	GT	0.80777	1.23798	0.426764	LT	0.979911	1.0205	0.645372	LT	0.717539	1.39365	0.210455	LT	0.870451	1.14883	0.501518	LT	1.21311	0.82433	0.300148	GT	-173	-172	-172	-2168	-2152	-2135	1431	1442	1453
101857_at	P	P	P	P	1107.12	785.536	1428.7	767.933	296.111	1239.76	1265.43	928.788	1602.08	1250.07	990.468	1509.67	1.44168	0.693634	0.226103	GT	0.874891	1.143	0.508705	LT	0.885646	1.12912	0.498822	LT	0.606854	1.64784	0.164066	LT	0.614314	1.62783	0.149629	LT	1.01229	0.987857	0.988896	GT	-16454	-16386	-16317	-1686	-1676	-1666	-866	-861	-856
101858_at	P	P	P	P	1195.35	980.827	1409.87	848.033	791.101	904.966	770.433	685.081	855.786	844.367	759.627	929.107	1.40956	0.709444	0.0654646	GT	1.55153	0.644525	0.02691	GT	1.41568	0.706376	0.0644676	GT	1.10072	0.908494	0.217993	GT	1.00434	0.995676	0.929945	GT	0.912439	1.09596	0.292682	LT	-837	-835	-834	1718	1722	1726	1436	1440	1443
101860_at	P	P	P	P	664.333	503.07	825.597	930.567	411.019	1450.11	854.367	505.613	1203.12	649.033	637.29	660.777	0.713902	1.40075	0.282295	LT	0.777574	1.28605	0.305058	LT	1.02357	0.976969	0.95545	GT	1.08919	0.918114	0.896778	GT	1.43377	0.69746	0.38595	GT	1.31637	0.759666	0.353447	GT	-532	-530	-527	-1293	-1284	-1276	11386	11459	11532
101865_at	A	A	A	P	158.333	109.166	207.501	111.3	64.0505	158.549	187.967	138.253	237.68	252.367	196.677	308.056	1.42258	0.702947	0.263414	GT	0.842348	1.18716	0.411072	LT	0.627394	1.59389	0.0739242	LT	0.592126	1.68883	0.108595	LT	0.441025	2.26745	0.0318432	LT	0.744816	1.34261	0.158717	LT	777	781	784	-273	-271	-269	-306	-303	-301
101866_at	P	P	P	P	2159.53	1716.43	2602.63	4039.83	3837.84	4241.83	1981.7	1692.42	2270.98	2110.4	2079.89	2140.91	0.53456	1.8707	0.00314301	LT	1.08974	0.917652	0.684673	GT	1.02328	0.977248	0.984991	GT	2.03857	0.49054	0.000922912	GT	1.91425	0.522398	1.7189e-05	GT	0.939016	1.06494	0.426903	LT	-760	-758	-756	-455	-453	-452	1162	1165	1169
101867_at	P	P	P	P	1052.48	956.159	1148.81	716.167	564.635	867.698	720.933	697.982	743.885	948.733	620.18	1277.29	1.46961	0.680454	0.00533417	GT	1.45989	0.684983	0.0008821	GT	1.10936	0.901424	0.359041	GT	0.993388	1.00666	0.877179	LT	0.754866	1.32474	0.268794	LT	0.75989	1.31598	0.231068	LT	1105	1107	1109	3831	3840	3849	-14568	-14535	-14502
101875_at	P	A	P	P	1353	905.302	1800.7	709.633	556.593	862.674	789.2	687.938	890.462	1070.47	697.268	1443.67	1.90662	0.524489	0.112819	GT	1.71439	0.583296	0.184209	GT	1.26393	0.79118	0.608837	GT	0.899181	1.11212	0.434835	LT	0.66292	1.50848	0.145042	LT	0.737249	1.35639	0.230396	LT	-207	-206	-205	-814	-809	-804	2671	2687	2703
101876_s_at	P	P	P	P	1266.58	844.411	1688.76	4194.67	3140.16	5249.17	1519.83	1417.4	1622.26	4748.97	4250.89	5247.05	0.301951	3.3118	0.00119268	LT	0.83337	1.19995	0.308766	LT	0.266707	3.74943	0.000443051	LT	2.75995	0.362325	0.00198567	GT	0.88328	1.13214	0.393158	LT	0.320035	3.12466	5.80219e-05	LT	-748	-745	-742	2008	2020	2031	-1287	-1280	-1272
101877_at	P	P	P	P	2757.8	2053.69	3461.91	2044.63	1520.72	2568.55	2798.8	1746	3851.6	2553.53	2252.64	2854.43	1.3488	0.7414	0.187645	GT	0.985351	1.01487	0.938587	LT	1.07999	0.925931	0.81127	GT	0.730539	1.36885	0.256872	LT	0.800708	1.2489	0.171624	LT	1.09605	0.912367	0.77089	GT	529	530	532	545	547	549	514	516	518
101879_s_at	P	P	P	P	809.033	611.504	1006.56	624.433	329.137	919.73	638.033	242.807	1033.26	515.933	350.54	681.326	1.29563	0.771826	0.296546	GT	1.26801	0.788637	0.309358	GT	1.5681	0.637716	0.0760526	GT	0.978684	1.02178	0.996128	LT	1.2103	0.826242	0.674189	GT	1.23666	0.808631	0.679482	GT	3712	3727	3743	-1891	-1880	-1869	-1823	-1812	-1802
101881_g_at	P	P	P	P	2024.8	1584.12	2465.48	1851.37	1233.86	2468.87	2267.53	1894.06	2641	1273.83	1078.69	1468.98	1.09368	0.914345	0.759531	GT	0.892953	1.11988	0.514554	LT	1.58953	0.629116	0.0911449	GT	0.816467	1.22479	0.31789	LT	1.45338	0.68805	0.150547	GT	1.78009	0.56177	0.00696707	GT	-500	-499	-497	-1003	-999	-995	10113	10155	10198
101882_s_at	P	A	P	A	1503.92	914.601	2093.23	1327.77	1016.43	1639.11	2066.07	1434.58	2697.55	1357.23	1018.58	1695.89	1.13267	0.882872	0.964188	GT	0.727913	1.37379	0.337328	LT	1.10808	0.902466	0.928814	GT	0.642654	1.55605	0.102643	LT	0.978289	1.02219	0.912108	LT	1.52226	0.656917	0.121697	GT	-248	-247	-246	-509	-506	-503	2232	2245	2258
101886_f_at	P	P	P	P	2545.73	1239.97	3851.49	9354.7	8782.05	9927.35	3676.17	2713.15	4639.19	6696.4	6258.26	7134.54	0.272134	3.67466	0.00550903	LT	0.692497	1.44405	0.222872	LT	0.380164	2.63044	0.0186637	LT	2.54469	0.392975	0.00262852	GT	1.39697	0.715833	0.00186319	GT	0.548977	1.82157	0.0125509	LT	-224	-223	-222	-854	-848	-843	-644	-640	-636
101890_f_at	P	P	P	P	4709.2	2962.11	6456.29	6775.13	4238.02	9312.25	4512	3890.15	5133.85	5749	4680.68	6817.32	0.695071	1.4387	0.240291	LT	1.04371	0.958125	0.882475	GT	0.819134	1.2208	0.370228	LT	1.50158	0.665965	0.179701	GT	1.17849	0.848544	0.608237	GT	0.784832	1.27416	0.11253	LT	3275	3292	3310	221	223	225	-433	-430	-427
101892_f_at	P	P	P	P	796.733	603.059	990.407	444.833	258.445	631.222	795.533	650.377	940.69	457.533	311.913	603.153	1.79108	0.558321	0.0638085	GT	1.00151	0.998494	0.868887	GT	1.74137	0.574262	0.0663965	GT	0.559164	1.78839	0.063187	LT	0.972242	1.02855	0.865341	LT	1.73874	0.575128	0.0390175	GT	546	548	550	1002	1008	1013	-9365	-9315	-9265
101894_s_at	P	P	P	P	574.383	487.38	661.387	314.5	174.516	454.484	548.167	344.11	752.223	424.633	330.08	519.187	1.82634	0.547544	0.011309	GT	1.04783	0.954357	0.703323	GT	1.35266	0.739286	0.0672025	GT	0.573731	1.74298	0.118741	LT	0.740639	1.35019	0.257818	LT	1.29092	0.774643	0.338341	GT	-1896	-1890	-1885	-324	-323	-322	-5332	-5310	-5287
101901_at	P	P	P	P	740.133	455.486	1024.78	903.333	513.484	1293.18	899	717.002	1081	783.9	651.68	916.12	0.819336	1.2205	0.501391	LT	0.823285	1.21465	0.433117	LT	0.944168	1.05913	0.64142	LT	1.00482	0.995203	0.897782	GT	1.15236	0.867786	0.69075	GT	1.14683	0.871969	0.374054	GT	-234	-233	-232	-819	-815	-810	530	533	536
101902_at	P	P	P	P	504.567	370.848	638.286	381.1	289.544	472.656	604.433	457.55	751.317	699.767	631.22	768.313	1.32397	0.755302	0.317631	GT	0.834776	1.19793	0.382474	LT	0.72105	1.38687	0.12659	LT	0.630508	1.58602	0.0588385	LT	0.54461	1.83618	0.00819356	LT	0.863764	1.15772	0.315596	LT	-1123	-1120	-1116	-2335	-2326	-2317	667	669	672
101905_at	P	P	P	P	1542.02	1178.48	1905.55	1344.13	1174.75	1513.52	1503.3	1281.01	1725.59	1597.9	1296.05	1899.75	1.14722	0.871672	0.509292	GT	1.02575	0.974892	0.995811	GT	0.965027	1.03624	0.743182	LT	0.894122	1.11842	0.334817	LT	0.841187	1.1888	0.221984	LT	0.940797	1.06293	0.661021	LT	1233	1236	1238	348	350	351	9472	9500	9529
101906_at	P	P	P	P	6885.37	2881.06	10889.7	6624.73	2335.5	10914	6076.3	4098.42	8054.18	8578.37	3189.71	13967	1.03934	0.962147	0.859778	GT	1.13315	0.882495	0.790734	GT	0.802643	1.24588	0.558187	LT	1.09026	0.917214	0.924937	GT	0.77226	1.2949	0.655022	LT	0.708328	1.41177	0.611558	LT	-3477	-3441	-3404	116	118	120	-327	-322	-317
101913_at	P	P	P	P	781.067	613.782	948.351	425.467	296.826	554.107	813.667	739.736	887.597	811.367	718.922	903.811	1.83579	0.544725	0.0145804	GT	0.959934	1.04174	0.68708	LT	0.962656	1.03879	0.707581	LT	0.5229	1.91241	0.0121017	LT	0.524383	1.907	0.0135247	LT	1.00283	0.997173	0.959662	GT	1535	1538	1542	-1415	-1410	-1406	-2149	-2142	-2135
101914_at	P	P	P	P	2321.78	1823.79	2819.78	2212.4	1585	2839.8	3214.43	2108.44	4320.43	2480	1191.43	3768.57	1.04944	0.952888	0.83725	GT	0.722299	1.38447	0.167256	LT	0.936203	1.06814	0.984339	LT	0.688271	1.45292	0.22431	LT	0.892097	1.12095	0.903031	LT	1.29614	0.77152	0.450721	GT	542	544	547	591	594	597	4210	4233	4255
101916_at	P	A	A	A	832.517	767.287	897.746	513.867	433.871	593.862	544.367	352.633	736.101	475.167	409.749	540.584	1.6201	0.617245	0.000571274	GT	1.52933	0.653881	0.0119938	GT	1.75205	0.570759	0.00016479	GT	0.943972	1.05935	0.884026	LT	1.08145	0.924689	0.513051	GT	1.14563	0.87288	0.611208	GT	1035	1038	1042	-244	-243	-242	-274	-273	-272
101918_at	P	A	P	A	1444.57	890.059	1999.07	412.233	271.117	553.35	820.1	440.512	1199.69	713.033	572.858	853.208	3.50425	0.285368	0.0127218	GT	1.76145	0.567714	0.209728	GT	2.02595	0.493597	0.119513	GT	0.502662	1.98941	0.0937407	LT	0.57814	1.72968	0.0532128	LT	1.15016	0.869447	0.743148	GT	-251	-250	-248	-283	-280	-278	575	581	586
101919_at	P	P	P	P	780.417	485.321	1075.51	1369.33	373.798	2364.87	1425.53	996.228	1854.84	1494.43	1090.2	1898.67	0.569925	1.75462	0.291849	LT	0.547456	1.82663	0.174682	LT	0.522216	1.91492	0.149022	LT	0.960576	1.04104	0.731194	LT	0.916289	1.09136	0.635302	LT	0.953896	1.04833	0.825586	LT	68	69	69	188	190	192	359	363	367
101920_at	P	P	P	P	891.883	645.289	1138.48	252.433	114.712	390.155	715.367	675.607	755.127	402.267	224.041	580.493	3.53314	0.283034	0.00333211	GT	1.24675	0.802085	0.423602	GT	2.21714	0.451031	0.0146937	GT	0.352873	2.83388	0.0292015	LT	0.627527	1.59356	0.268772	LT	1.77834	0.562322	0.0464227	GT	194	194	195	993	999	1005	194	196	197
101921_at	P	P	P	P	1075.43	976.262	1174.6	835.267	564.309	1106.22	1037.13	940.662	1133.6	955.433	675.694	1235.17	1.28753	0.776679	0.0624075	GT	1.03693	0.964386	0.671826	GT	1.1256	0.888417	0.312843	GT	0.805361	1.24168	0.218522	LT	0.874228	1.14387	0.585227	LT	1.08551	0.921225	0.572399	GT	8196	8213	8230	799	801	803	543	544	546
101922_at	P	P	P	P	862.033	613.061	1111.01	802.167	389.507	1214.83	927.233	609.502	1244.96	1038.1	974.478	1101.72	1.07463	0.930552	0.828261	GT	0.929683	1.07564	0.709891	LT	0.830395	1.20425	0.355369	LT	0.865118	1.15591	0.591268	LT	0.772726	1.29412	0.26154	LT	0.893202	1.11957	0.473954	LT	-2420	-2410	-2401	-5773	-5741	-5709	1250	1257	1264
101923_at	P	A	A	A	154.767	85.2426	224.291	141.367	36.3847	246.349	93.7333	78.4937	108.973	93.6333	68.1485	119.118	1.09479	0.913418	0.733902	GT	1.65114	0.605643	0.304415	GT	1.6529	0.604997	0.298842	GT	1.50818	0.663051	0.695501	GT	1.50979	0.662344	0.683982	GT	1.00107	0.998933	0.934947	GT	1071	1079	1087	488	493	498	-525	-520	-514
101924_at	P	A	P	A	455.333	383.176	527.491	193.2	94.184	292.216	411.333	320.528	502.138	329.167	268.239	390.094	2.3568	0.424305	0.00303762	GT	1.10697	0.903367	0.510741	GT	1.38329	0.722914	0.0506832	GT	0.469692	2.12905	0.0429423	LT	0.586937	1.70376	0.0931367	LT	1.24962	0.800243	0.204372	GT	-2030	-2023	-2016	-1166	-1161	-1155	180	181	182
101926_at	P	A	A	A	538.083	362.317	713.849	237.867	185.607	290.126	502.567	333.703	671.43	409.5	364.94	454.06	2.26212	0.442063	0.0195717	GT	1.07067	0.933994	0.908204	GT	1.314	0.761035	0.42476	GT	0.473304	2.11281	0.0277617	LT	0.580871	1.72155	0.0104229	LT	1.22727	0.814817	0.419098	GT	-1121	-1117	-1113	318	319	321	389	391	393
101929_at	P	P	P	P	2511.47	1866.44	3156.49	1223.1	797.52	1648.68	2036.6	1658.33	2414.87	2721.8	2563.26	2880.34	2.05336	0.487006	0.0306364	GT	1.23317	0.810921	0.511192	GT	0.922723	1.08375	0.579954	LT	0.60056	1.66511	0.0620943	LT	0.449372	2.22533	0.0106537	LT	0.748255	1.33644	0.045857	LT	-349	-348	-347	-292	-291	-290	1212	1217	1222
101930_at	P	P	P	P	2676.65	1996.44	3356.86	2159.1	1240.06	3078.14	2126.83	1185.66	3068.01	3097.1	2361.57	3832.63	1.23971	0.806643	0.424601	GT	1.25851	0.794588	0.396133	GT	0.864244	1.15708	0.445002	LT	1.01517	0.985056	0.925742	GT	0.697136	1.43444	0.170064	LT	0.686718	1.4562	0.207814	LT	-590	-587	-585	-289	-288	-286	2214	2226	2238
101931_at	P	P	P	P	2512.03	2117.93	2906.14	1947.53	1717.04	2178.02	2260.13	2118.38	2401.88	2649.93	2379.05	2920.82	1.28985	0.775282	0.126509	GT	1.11145	0.899723	0.532399	GT	0.947961	1.0549	0.626156	LT	0.86169	1.16051	0.0930728	LT	0.734937	1.36066	0.0182121	LT	0.852902	1.17247	0.0620757	LT	-419	-418	-418	-1379	-1375	-1372	499	500	501
101932_at	P	P	P	P	1026.85	817.453	1236.25	720.467	568.261	872.672	740.333	688.313	792.353	1018.2	867.336	1169.06	1.42526	0.701628	0.125448	GT	1.38701	0.720975	0.143744	GT	1.0085	0.991576	0.920397	GT	0.973165	1.02757	0.757831	LT	0.707589	1.41325	0.0549806	LT	0.7271	1.37533	0.0193381	LT	288	289	290	514	516	518	593	596	598
101933_at	P	P	P	P	1377.45	998.955	1755.94	862.467	734.67	990.263	1694.9	1492.51	1897.29	1518.3	1197.67	1838.93	1.59711	0.626133	0.168306	GT	0.812703	1.23046	0.337649	LT	0.907232	1.10225	0.586329	LT	0.50886	1.96518	0.00208726	LT	0.568048	1.76042	0.0118542	LT	1.11631	0.895805	0.386141	GT	576	578	580	-932	-928	-924	1604	1612	1619
101934_at	P	P	P	P	484.85	410.089	559.611	903.933	844.59	963.277	999.533	741.823	1257.24	734.033	514.767	953.3	0.536378	1.86436	0.00228516	LT	0.485076	2.06153	0.00304653	LT	0.660529	1.51394	0.0525275	LT	0.904355	1.10576	0.594214	LT	1.23146	0.812044	0.245047	GT	1.3617	0.734376	0.22136	GT	-1049	-1047	-1044	-3585	-3571	-3556	1128	1133	1137
101936_at	P	P	P	P	885.317	616.365	1154.27	2916.63	1925.28	3907.99	2644.57	1940.36	3348.77	1525.97	1123.55	1928.38	0.303541	3.29445	0.00490499	LT	0.334768	2.98714	0.00583821	LT	0.580168	1.72364	0.0782464	LT	1.10288	0.906719	0.735613	GT	1.91133	0.523195	0.0499614	GT	1.73304	0.57702	0.0457951	GT	78	78	78	510	513	516	-15185	-15097	-15009
101937_s_at	P	P	P	P	353.483	259.174	447.793	1158.37	915.382	1401.35	1098.43	646.981	1549.89	734.333	575.712	892.954	0.305157	3.27701	0.000607706	LT	0.321807	3.10745	0.00243811	LT	0.481366	2.07742	0.00771886	LT	1.05456	0.94826	0.736511	GT	1.57744	0.633939	0.0389242	GT	1.49582	0.668528	0.216791	GT	166	166	167	-1997	-1988	-1980	-2456	-2445	-2435
101938_at	P	P	P	P	304.583	273.746	335.42	311.667	304.346	318.987	296.633	240.144	353.123	350.833	277.344	424.322	0.977273	1.02326	0.711619	LT	1.0268	0.973899	0.778331	GT	0.868171	1.15185	0.219791	LT	1.05068	0.951765	0.573351	GT	0.888361	1.12567	0.356873	LT	0.845511	1.18272	0.300239	LT	-3846	-3839	-3831	1997	2003	2009	-343	-342	-341
101939_at	P	P	P	P	3745.98	3201.91	4290.06	2889.73	1520.69	4258.78	3232.8	2218.93	4246.67	3636.03	2770.18	4501.89	1.29631	0.771422	0.169167	GT	1.15874	0.863004	0.308338	GT	1.03024	0.970649	0.815126	GT	0.893879	1.11872	0.641743	LT	0.794749	1.25826	0.396351	LT	0.889101	1.12473	0.556525	LT	979	982	986	842	846	850	-4275	-4254	-4233
101942_at	P	P	P	P	964.367	821.113	1107.62	1126.8	1094.14	1159.46	1062.23	750.012	1374.45	1236.5	1059.68	1413.32	0.855845	1.16844	0.191223	LT	0.907867	1.10148	0.587066	LT	0.779916	1.28219	0.0829338	LT	1.06078	0.942699	0.625698	GT	0.911282	1.09736	0.321272	LT	0.859065	1.16406	0.381778	LT	2350	2355	2360	1159	1163	1166	4761	4776	4790
101943_at	P	P	P	P	1021.67	870.518	1172.82	863.6	828.486	898.714	920.2	890.399	950.001	942.4	878.261	1006.54	1.18303	0.845285	0.183525	GT	1.11027	0.900685	0.41122	GT	1.08411	0.922414	0.540163	GT	0.938492	1.06554	0.0738812	LT	0.916384	1.09125	0.0984867	LT	0.976443	1.02413	0.582086	LT	462	463	464	-1161	-1158	-1155	885	887	889
101944_at	P	P	P	P	2015.07	1665.03	2365.1	1755.97	1611.87	1900.06	1769.43	1631.5	1907.37	2226.87	1905.84	2547.89	1.14755	0.871419	0.388041	GT	1.13882	0.878102	0.416666	GT	0.904889	1.10511	0.434162	LT	0.992389	1.00767	0.898157	LT	0.788537	1.26817	0.0544763	LT	0.794584	1.25852	0.0566221	LT	-1980	-1976	-1972	3141	3151	3161	-301	-301	-300
101945_g_at	P	P	P	P	183.35	107.241	259.459	133.633	83.0409	184.226	180.133	121.561	238.705	253.267	213.527	293.007	1.37204	0.728843	0.525555	GT	1.01786	0.982456	0.829718	GT	0.723941	1.38133	0.227706	LT	0.741858	1.34797	0.269351	LT	0.527639	1.89524	0.0286296	LT	0.71124	1.406	0.11067	LT	-358	-356	-354	-5714	-5672	-5629	-880	-874	-867
101946_at	P	P	P	P	1051.03	746.364	1355.7	661.867	317.134	1006.6	949.2	849.472	1048.93	1156.07	1015.99	1296.14	1.58798	0.629729	0.155447	GT	1.10728	0.903111	0.869654	GT	0.909146	1.09993	0.549097	LT	0.697289	1.43413	0.170955	LT	0.572516	1.74668	0.0726887	LT	0.82106	1.21794	0.0720422	LT	-573	-570	-568	1242	1251	1259	-252	-250	-248
101947_at	P	P	P	P	794.217	498.838	1089.6	511.9	227.192	796.608	954.367	851.174	1057.56	724.7	601.016	848.384	1.55151	0.644534	0.452379	GT	0.832192	1.20165	0.453346	LT	1.09592	0.912471	0.90169	GT	0.536377	1.86436	0.0666813	LT	0.706361	1.41571	0.219493	LT	1.31691	0.759352	0.0554895	GT	-191	-190	-190	-542	-538	-535	-1557	-1548	-1539
101948_at	P	P	P	P	858.85	642.172	1075.53	636.267	472.038	800.496	755.8	650.576	861.024	744.5	678.066	810.934	1.34983	0.740836	0.238397	GT	1.13635	0.880014	0.669335	GT	1.15359	0.866857	0.622859	GT	0.841845	1.18787	0.269272	LT	0.854623	1.17011	0.269029	LT	1.01518	0.985049	0.890548	GT	2504	2510	2517	-3141	-3130	-3119	4376	4391	4407
101949_at	A	P	A	A	560.567	432.946	688.187	681.367	489.892	872.841	618.3	519.71	716.89	616.5	504.712	728.288	0.822709	1.2155	0.304731	LT	0.906626	1.10299	0.494595	LT	0.909273	1.09978	0.517779	LT	1.102	0.907441	0.638007	GT	1.10522	0.904799	0.631318	GT	1.00292	0.997089	0.970507	GT	-719	-717	-715	2004	2011	2019	772	775	777
101950_at	P	P	P	A	327.35	186.35	468.35	478.267	410.605	545.928	501.867	393.316	610.417	226.833	201.376	252.291	0.684451	1.46103	0.125357	LT	0.652265	1.53312	0.10526	LT	1.44313	0.692938	0.333555	GT	0.952976	1.04934	0.760786	LT	2.10845	0.474282	0.00114135	GT	2.21249	0.451979	0.00283547	GT	-844	-841	-837	-594	-590	-587	-773	-768	-764
101954_at	P	P	P	P	11425.2	8602.15	14248.3	7350.43	5874.78	8826.09	10805.5	7527.83	14083.1	9537.23	8578.96	10495.5	1.55436	0.643352	0.069243	GT	1.05736	0.945756	0.852651	GT	1.19796	0.834753	0.458899	GT	0.680251	1.47004	0.103926	LT	0.770709	1.29751	0.0738174	LT	1.13298	0.88263	0.540521	GT	567	568	570	1134	1138	1142	533	534	536
101955_at	P	P	P	P	15424.4	12687	18161.7	12730.2	2713.28	22747.1	10514	10023.2	11004.8	14389.6	13222.4	15556.9	1.21163	0.825331	0.305718	GT	1.46703	0.681649	0.0418117	GT	1.07191	0.932917	0.75172	GT	1.21079	0.82591	0.942808	GT	0.884679	1.13035	0.52183	LT	0.730665	1.36862	0.00293533	LT	-3642	-3628	-3615	-2156	-2144	-2133	1715	1724	1733
101957_f_at	P	P	P	P	1341.82	1020.52	1663.11	831.067	753.673	908.461	936.967	355.531	1518.4	1025.77	835.002	1216.53	1.61457	0.619359	0.0337789	GT	1.43209	0.698282	0.150923	GT	1.30811	0.764461	0.212735	GT	0.886976	1.12743	0.939286	LT	0.810191	1.23428	0.118992	LT	0.913431	1.09477	0.607014	LT	3034	3044	3054	3702	3719	3737	539	541	544
101958_f_at	P	P	P	P	4820.55	3095.46	6545.64	3895.2	2351.47	5438.93	4632.47	3814.76	5450.18	4744.73	3930.21	5559.25	1.23756	0.808041	0.588331	GT	1.0406	0.960983	0.899673	GT	1.01598	0.984272	0.831429	GT	0.840848	1.18928	0.391228	LT	0.820952	1.2181	0.338621	LT	0.976339	1.02423	0.85064	LT	587	589	591	-3884	-3867	-3850	591	593	596
101959_r_at	P	P	P	P	12966.5	8203.96	17729	10177.5	5261.53	15093.5	11311.1	9296.35	13325.9	11004.9	10799	11210.8	1.27404	0.784907	0.486397	GT	1.14635	0.872333	0.813409	GT	1.17825	0.848718	0.752397	GT	0.89978	1.11138	0.569474	LT	0.924815	1.0813	0.595398	LT	1.02782	0.972929	0.833861	GT	587	589	591	-1459	-1453	-1446	-3485	-3470	-3455
101960_at	P	P	P	P	1424.33	1248.96	1599.7	1769.3	1340.22	2198.38	1302.53	1121.52	1483.55	1625.8	1410.73	1840.87	0.805026	1.2422	0.130346	LT	1.09351	0.914486	0.444876	GT	0.876082	1.14145	0.220598	LT	1.35835	0.736186	0.107293	GT	1.08826	0.918894	0.626824	GT	0.801165	1.24818	0.083866	LT	-670	-668	-667	-433	-431	-430	1166	1169	1172
101961_at	P	P	P	P	5759.58	4740.04	6779.13	5688	4246.92	7129.08	4914.43	3932.78	5896.08	6239.4	5845.02	6633.78	1.01258	0.987571	0.957299	GT	1.17197	0.853262	0.341731	GT	0.923099	1.08331	0.475907	LT	1.15741	0.864	0.43446	GT	0.911626	1.09694	0.448206	LT	0.787645	1.26961	0.0883554	LT	803	805	807	-590	-588	-587	1030	1033	1036
101962_at	P	P	P	P	5434.08	4582.59	6285.58	2516.03	1208.76	3823.31	3399.73	3307.63	3491.83	5087.03	4371.19	5802.88	2.15978	0.46301	0.004775	GT	1.59839	0.625631	0.00695692	GT	1.06822	0.936135	0.683169	GT	0.740068	1.35123	0.213988	LT	0.494597	2.02185	0.0409976	LT	0.668314	1.4963	0.00502213	LT	4766	4777	4788	1576	1581	1586	452	454	455
101963_at	P	P	P	P	1862.93	681.391	3044.48	2534.13	414.752	4653.51	1311.43	965.576	1657.29	1216.1	1068.58	1363.62	0.735136	1.36029	0.530546	LT	1.42053	0.703961	0.649937	GT	1.53189	0.652788	0.53664	GT	1.93234	0.517508	0.345987	GT	2.08382	0.479888	0.28143	GT	1.07839	0.927306	0.69516	GT	-786	-781	-776	-5639	-5592	-5545	-1803	-1788	-1773
101964_at	P	P	P	P	4246.77	2832.52	5661.02	3559	2199.81	4918.19	4127.87	3275.16	4980.58	2921.13	2049.17	3793.09	1.19325	0.838049	0.714387	GT	1.0288	0.972002	0.869523	GT	1.45381	0.687849	0.364173	GT	0.862189	1.15984	0.472484	LT	1.21836	0.820774	0.515828	GT	1.4131	0.707662	0.138752	GT	-301	-300	-299	-711	-708	-704	2698	2712	2726
101965_at	P	P	P	P	1568.57	786.404	2350.73	484.1	174.84	793.36	1478.6	193.597	2763.6	570.6	508.968	632.232	3.24017	0.308626	0.0595925	GT	1.06085	0.942644	0.927838	GT	2.74898	0.363772	0.10301	GT	0.327404	3.05433	0.116259	LT	0.848405	1.17868	0.456578	LT	2.59131	0.385906	0.136005	GT	275	277	279	2671	2699	2727	-467	-462	-458
101966_s_at	P	P	P	P	1016	650.336	1381.66	784.7	396.102	1173.3	1204.97	1050.46	1359.47	905.333	797.511	1013.16	1.29476	0.772343	0.503303	GT	0.843177	1.18599	0.40097	LT	1.12224	0.891076	0.920409	GT	0.651221	1.53558	0.118113	LT	0.866753	1.15373	0.460312	LT	1.33096	0.751335	0.0354688	GT	-979	-975	-971	2127	2140	2152	-343	-341	-339
101971_at	P	P	P	P	4574.87	3868.79	5280.94	4188.93	2709.3	5668.57	5286.67	4799.51	5773.82	4625.97	3989.52	5262.41	1.09213	0.915641	0.53975	GT	0.865359	1.15559	0.217202	LT	0.988954	1.01117	0.869422	LT	0.792358	1.26206	0.254896	LT	0.905526	1.10433	0.56613	LT	1.14282	0.875025	0.19054	GT	-609	-608	-606	-910	-908	-905	-1998	-1992	-1986
101972_at	P	A	A	A	460.85	298.4	623.3	233.967	57.2021	410.731	146.533	7.59053	285.476	44.4	8.16436	80.6356	1.96973	0.507685	0.0925455	GT	3.14502	0.317963	0.0245521	GT	10.3795	0.0963437	0.000269258	GT	1.59668	0.6263	0.504455	GT	5.26952	0.189771	0.0632755	GT	3.3003	0.303003	0.24805	GT	1149	1160	1171	215	218	221	-1383	-1365	-1346
101973_at	P	P	P	P	1983.37	1463.73	2503	1375.97	1247.51	1504.43	2923.03	2454.88	3391.18	2482.73	1917.06	3048.4	1.44144	0.693753	0.210873	GT	0.67853	1.47377	0.104231	LT	0.798864	1.25178	0.307073	LT	0.470732	2.12435	0.00157153	LT	0.554214	1.80436	0.0114771	LT	1.17734	0.849369	0.314387	GT	71	71	71	515	517	520	263	264	266
101975_at	P	P	P	P	358.05	280.659	435.441	379.967	279.453	480.48	394.633	258.747	530.519	427.033	332.681	521.385	0.94232	1.06121	0.69616	LT	0.907298	1.10217	0.632352	LT	0.838459	1.19266	0.294432	LT	0.962835	1.0386	0.916444	LT	0.889782	1.12387	0.531916	LT	0.924128	1.0821	0.67474	LT	-1145	-1143	-1140	-2860	-2850	-2840	-821	-818	-815
101976_at	P	P	P	P	2611.15	2258.22	2964.08	2337.03	2169.23	2504.84	2190	1824	2556	1867.23	1623.33	2111.13	1.11729	0.895021	0.34581	GT	1.19231	0.838711	0.166516	GT	1.39841	0.7151	0.0176818	GT	1.06714	0.937085	0.479595	GT	1.2516	0.798976	0.0409785	GT	1.17286	0.852618	0.215598	GT	-934	-932	-931	-495	-494	-492	-5375	-5362	-5349
101977_at	P	P	P	P	2628.05	1957.72	3298.38	2829.03	1203.06	4455.01	2652.27	2362.27	2942.26	2606	1700.83	3511.17	0.928957	1.07648	0.884292	LT	0.990869	1.00921	0.803292	LT	1.00846	0.99161	0.969347	GT	1.06665	0.937517	0.960543	GT	1.08558	0.921163	0.925599	GT	1.01775	0.982556	0.816159	GT	-279	-278	-277	590	593	596	-1945	-1936	-1928
101979_at	P	P	P	P	709.917	431.695	988.138	7071.53	4665.88	9477.19	2495.73	705.016	4286.45	1646.53	1226.17	2066.89	0.100391	9.96108	0.000373248	LT	0.284452	3.51553	0.0365537	LT	0.431158	2.31933	0.0368738	LT	2.83345	0.352927	0.0692458	GT	4.2948	0.23284	0.00228833	GT	1.51575	0.659739	0.621258	GT	62	63	64	381	385	390	120	121	123
101981_at	P	P	P	P	891.267	461.038	1321.5	694.233	432.008	956.458	586.8	524.817	648.783	618.967	574.867	663.066	1.28381	0.778929	0.927684	GT	1.51886	0.658389	0.740729	GT	1.43993	0.69448	0.816865	GT	1.18308	0.845249	0.570818	GT	1.1216	0.891583	0.734078	GT	0.948032	1.05482	0.449698	LT	-241	-240	-239	-628	-623	-618	-300	-298	-296
101982_at	P	P	P	P	2716.1	1883.77	3548.43	1795.5	715.504	2875.5	2404.93	2233.18	2576.69	2586.33	1988.17	3184.5	1.51273	0.661058	0.291632	GT	1.12939	0.885436	0.916263	GT	1.05017	0.952223	0.937851	GT	0.74659	1.33942	0.312504	LT	0.694226	1.44045	0.278003	LT	0.929862	1.07543	0.670008	LT	-403	-401	-400	-554	-551	-548	733	738	742
101984_at	P	P	P	P	7691.73	5142.75	10240.7	8738.3	5549.31	11927.3	6478.77	5318.92	7638.62	5995.7	4523	7468.4	0.880232	1.13606	0.557032	LT	1.18722	0.842303	0.614736	GT	1.28287	0.779499	0.412388	GT	1.34876	0.741422	0.254768	GT	1.45743	0.68614	0.188297	GT	1.08057	0.925438	0.631235	GT	-1751	-1747	-1742	2389	2398	2407	8036	8066	8096
101989_at	P	P	P	P	11723.4	8594.35	14852.4	13342.1	10916.7	15767.4	10764.6	9075.11	12454	10364.6	9389.21	11340	0.878677	1.13807	0.475284	LT	1.08907	0.918215	0.866995	GT	1.1311	0.884098	0.751418	GT	1.23944	0.806814	0.167587	GT	1.28727	0.776836	0.0881308	GT	1.03859	0.962844	0.733911	GT	-351	-350	-349	-2994	-2983	-2972	1270	1274	1279
101992_at	P	P	P	P	6502.25	4906.48	8098.02	7378.97	7035.3	7722.64	5730.6	5133.27	6327.93	5807.9	5052.21	6563.59	0.881187	1.13483	0.456852	LT	1.13465	0.881326	0.739436	GT	1.11955	0.893214	0.779203	GT	1.28764	0.776613	0.0129273	GT	1.27051	0.787089	0.0243652	GT	0.986691	1.01349	0.893508	LT	-327	-326	-326	935	938	941	1453	1458	1462
101993_at	P	P	P	P	378.583	237.216	519.951	586.467	417.05	755.883	299.533	293.288	305.779	440.4	360.246	520.554	0.645533	1.54911	0.101946	LT	1.26391	0.791195	0.513292	GT	0.859635	1.16328	0.404094	LT	1.95793	0.510742	0.0160961	GT	1.33167	0.750938	0.217058	GT	0.680139	1.47029	0.0137447	LT	-1585	-1579	-1574	-1552	-1544	-1536	-1070	-1064	-1059
101995_at	P	P	P	P	6054.68	4118.08	7991.29	9977.4	7706.65	12248.1	8821.5	8214.48	9428.52	6721.7	5798.65	7644.75	0.60684	1.64788	0.0526534	LT	0.686355	1.45697	0.0908039	LT	0.900767	1.11017	0.503092	LT	1.13103	0.884148	0.424306	GT	1.48436	0.673693	0.0488465	GT	1.31239	0.761968	0.0235517	GT	-1310	-1306	-1302	-710	-707	-704	-1478	-1471	-1465
101996_at	P	P	P	P	800.75	548.503	1053	1160.13	483.975	1836.29	978.867	775.622	1182.11	1234.23	918.576	1549.89	0.690222	1.44881	0.40867	LT	0.818038	1.22244	0.402691	LT	0.648783	1.54135	0.155592	LT	1.18518	0.843754	0.877381	GT	0.939963	1.06387	0.69421	LT	0.793097	1.26088	0.230246	LT	409	411	413	753	758	763	-968	-961	-955
101997_at	P	P	P	P	1526.47	1353.43	1699.51	5146.07	4662.69	5629.44	5130.83	4553.79	5707.88	4985	4644.36	5325.64	0.296628	3.37123	4.17e-06	LT	0.297509	3.36125	4.8e-06	LT	0.306212	3.26571	4.08e-06	LT	1.00297	0.99704	0.961577	GT	1.03231	0.968701	0.634536	GT	1.02925	0.971577	0.704188	GT	-1444	-1440	-1436	-680	-677	-674	-554	-552	-550
101998_at	P	P	P	P	385.533	315.319	455.747	281	159.79	402.21	327.433	301.022	353.845	435.967	363.66	508.274	1.372	0.72886	0.164174	GT	1.17744	0.8493	0.433547	GT	0.884318	1.13081	0.434815	LT	0.85819	1.16524	0.418704	LT	0.644545	1.55148	0.109125	LT	0.751051	1.33147	0.0421629	LT	555	557	559	235	236	237	-3036	-3020	-3003
102000_f_at	P	P	P	P	7067.28	4185.3	9949.27	4240.9	3933.61	4548.19	5793.8	1917.99	9669.61	3853.67	2558.81	5148.53	1.66646	0.600075	0.224236	GT	1.2198	0.819806	0.606968	GT	1.83391	0.545283	0.145007	GT	0.731972	1.36617	0.550217	LT	1.10048	0.908691	0.511049	GT	1.50345	0.665136	0.407684	GT	1022	1026	1030	-808	-803	-799	-4653	-4628	-4602
102001_at	P	P	P	P	8157.4	6592.4	9722.4	4434.57	3641.16	5227.97	5173.7	4344.22	6003.18	8754	8447.76	9060.24	1.8395	0.543625	0.0131817	GT	1.57671	0.634234	0.0449072	GT	0.931848	1.07314	0.572951	LT	0.857136	1.16668	0.276385	LT	0.506576	1.97404	0.0016297	LT	0.59101	1.69202	0.00360837	LT	1436	1440	1444	-1082	-1078	-1073	1634	1640	1647
102003_at	P	P	P	P	1185.5	1026.86	1344.14	976.267	662.632	1289.9	940.667	849.202	1032.13	1010.33	703.506	1317.16	1.21432	0.823506	0.200454	GT	1.26028	0.793477	0.0787802	GT	1.17338	0.852242	0.266437	GT	1.03785	0.963535	0.941546	GT	0.966282	1.03489	0.870347	LT	0.931046	1.07406	0.758741	LT	-769	-767	-764	-1505	-1499	-1492	530	532	534
102007_at	P	A	P	P	187.683	158.189	217.177	191.467	113.865	269.068	261.033	207.308	314.759	366.3	327.919	404.681	0.98024	1.02016	0.990843	LT	0.719001	1.39082	0.0524548	LT	0.512376	1.95169	0.00138337	LT	0.733495	1.36334	0.20013	LT	0.522705	1.91313	0.0286662	LT	0.712622	1.40327	0.0389734	LT	275	277	280	113	115	116	-948	-938	-928
102011_at	P	A	P	P	475.883	338.543	613.223	310.967	181.696	440.237	350.367	300.683	400.05	457.1	423.081	491.119	1.53034	0.653451	0.185894	GT	1.35824	0.736245	0.337247	GT	1.04109	0.96053	0.936344	GT	0.887546	1.1267	0.535827	LT	0.680303	1.46993	0.141011	LT	0.766499	1.30463	0.0277436	LT	-334	-333	-332	506	508	510	2455	2465	2474
102012_at	P	P	P	P	2280.32	2100.99	2459.65	1417.3	678.049	2156.55	2159.63	2009.87	2309.4	1834.9	1434.15	2235.65	1.60892	0.621536	0.0254475	GT	1.05588	0.947076	0.455985	GT	1.24275	0.804669	0.0470266	GT	0.656269	1.52377	0.154282	LT	0.772413	1.29464	0.34433	LT	1.17698	0.849635	0.202421	GT	-791	-788	-786	-1731	-1724	-1717	-529	-527	-525
102015_at	A	P	A	A	257.167	163.367	350.966	626.067	513.063	739.07	274.533	158.622	390.445	330.2	316.12	344.28	0.410766	2.43448	0.021151	LT	0.936741	1.06753	0.757082	LT	0.778821	1.28399	0.312731	LT	2.28048	0.438505	0.0300485	GT	1.89602	0.52742	0.00249426	GT	0.831415	1.20277	0.389725	LT	-1770	-1760	-1751	-574	-569	-565	-1282	-1272	-1263
102017_at	P	A	P	P	240.783	126.641	354.926	191.4	99.484	283.316	307.4	194.721	420.079	363.433	301.427	425.44	1.25801	0.794906	0.847287	GT	0.78329	1.27667	0.484655	LT	0.662524	1.50938	0.37117	LT	0.622642	1.60606	0.206497	LT	0.526644	1.89882	0.0687306	LT	0.845822	1.18228	0.419111	LT	324	327	330	402	407	412	-423	-418	-413
102018_at	P	P	P	P	660.45	414.949	905.951	612.3	485.639	738.961	769.567	554.182	984.951	673.133	495.677	850.59	1.07864	0.927095	0.967557	GT	0.85821	1.16522	0.494907	LT	0.981158	1.0192	0.754516	LT	0.795643	1.25685	0.312129	LT	0.909627	1.09935	0.624615	LT	1.14326	0.874691	0.552582	GT	-612	-609	-607	1295	1302	1309	423	425	427
102019_at	P	P	P	P	2803.37	2342.1	3264.63	3107.2	2093.72	4120.68	2356.37	2067.59	2645.15	2892.97	2540.86	3245.08	0.902216	1.10838	0.576082	LT	1.1897	0.840549	0.271465	GT	0.969028	1.03196	0.739754	LT	1.31864	0.758357	0.20565	GT	1.07405	0.931053	0.782441	GT	0.814516	1.22772	0.0803874	LT	-656	-654	-653	2498	2506	2514	-952	-949	-947
102021_at	P	A	A	P	338.65	291.432	385.868	249.367	91.8099	406.923	251.433	179.114	323.752	426	320.204	531.796	1.35804	0.736355	0.118959	GT	1.34688	0.742458	0.0624528	GT	0.794953	1.25794	0.119506	LT	0.99178	1.00829	0.819295	LT	0.585368	1.70833	0.127181	LT	0.590219	1.69429	0.048165	LT	218	219	220	-3862	-3838	-3814	196	198	199
102022_at	P	P	P	P	225.667	196.645	254.688	178.433	119.89	236.977	248.6	237.044	260.156	152.1	135.777	168.423	1.26471	0.790694	0.128802	GT	0.90775	1.10162	0.287955	LT	1.48367	0.674003	0.00551692	GT	0.717753	1.39324	0.115511	LT	1.17313	0.852419	0.519519	GT	1.63445	0.611826	0.00120593	GT	-1764	-1760	-1756	-399	-398	-397	-706	-704	-702
102024_at	P	P	P	P	367.3	327.584	407.016	418	312.616	523.384	425.133	303.908	546.359	502.8	350.247	655.353	0.878708	1.13803	0.350399	LT	0.863964	1.15746	0.30518	LT	0.730509	1.36891	0.057387	LT	0.983221	1.01707	0.94517	LT	0.831344	1.20287	0.454431	LT	0.845532	1.18269	0.494707	LT	349	350	351	488	490	492	-850	-847	-843
102026_s_at	P	P	P	P	423.583	315.344	531.822	315.533	237.049	394.018	464.5	403.587	525.413	416.4	396.442	436.358	1.34244	0.744914	0.314037	GT	0.911912	1.0966	0.5593	LT	1.01725	0.983042	0.882791	GT	0.679297	1.47211	0.0447201	LT	0.757765	1.31967	0.0766806	LT	1.11551	0.896448	0.20927	GT	-490	-488	-487	8113	8144	8175	-1467	-1461	-1456
102027_s_at	P	P	P	P	3583.35	2791.47	4375.23	2705.73	2004.68	3406.78	4071.73	3878.65	4264.82	3451.53	2902.02	4001.05	1.32435	0.755085	0.284938	GT	0.880055	1.13629	0.434006	LT	1.03819	0.963214	0.992558	GT	0.664516	1.50485	0.0407991	LT	0.783922	1.27564	0.188388	LT	1.17969	0.847682	0.106502	GT	-2547	-2542	-2536	1005	1008	1011	-538	-536	-535
102028_at	P	P	P	P	330.633	267.121	394.146	439.433	174.589	704.278	834.733	550.841	1118.63	390.3	333.615	446.985	0.752408	1.32907	0.589231	LT	0.396095	2.52465	0.00215248	LT	0.847126	1.18046	0.266884	LT	0.526436	1.89957	0.172648	LT	1.12589	0.888189	0.974276	GT	2.1387	0.467574	0.0244552	GT	280	281	282	-286	-285	-283	1227	1234	1240
102029_at	P	P	P	P	136.883	98.2075	175.559	132.7	98.4526	166.947	129.433	101.121	157.746	161.2	108.921	213.479	1.03152	0.969439	0.965471	GT	1.05756	0.945574	0.972115	GT	0.849152	1.17765	0.470563	LT	1.02524	0.975383	0.913964	GT	0.823201	1.21477	0.423004	LT	0.802936	1.24543	0.35526	LT	727	730	732	1548	1555	1563	-799	-795	-792
102030_at	P	A	P	A	55.2167	32.9994	77.4339	43.9667	1.76198	86.1714	61.3	19.2113	103.389	87	62.0489	111.951	1.25588	0.796257	0.484834	GT	0.900761	1.11017	0.894864	LT	0.634674	1.57561	0.181152	LT	0.717238	1.39424	0.572559	LT	0.505364	1.97877	0.193464	LT	0.704598	1.41925	0.353694	LT	-300	-298	-295	-299	-295	-291	-204	-201	-198
102031_at	P	P	P	P	208.333	161.171	255.495	284.8	198.494	371.106	176.333	140.111	212.556	295.433	266.747	324.12	0.731507	1.36704	0.15524	LT	1.18147	0.8464	0.487351	GT	0.705179	1.41808	0.0743881	LT	1.61512	0.619148	0.0647784	GT	0.964008	1.03734	0.734045	LT	0.596863	1.67543	0.0120534	LT	472	473	474	284	285	286	-407	-406	-404
102032_at	P	P	P	P	1851.13	1359.73	2342.54	823.433	733.519	913.347	1193.9	806.387	1581.41	1885.13	1391.12	2379.14	2.24807	0.444827	0.0109635	GT	1.55049	0.644956	0.134496	GT	0.981964	1.01837	0.824733	LT	0.6897	1.4499	0.120155	LT	0.436804	2.28936	0.0041317	LT	0.633324	1.57897	0.089887	LT	428	430	431	1828	1838	1847	-649	-646	-643
102033_at	P	P	P	P	1698.33	1301.66	2095.01	968.4	584.207	1352.59	1160.27	817.264	1503.27	1498.13	1075.05	1921.22	1.75375	0.570206	0.0465704	GT	1.46374	0.68318	0.136492	GT	1.13363	0.88212	0.637839	GT	0.834636	1.19813	0.468792	LT	0.646404	1.54702	0.132799	LT	0.774475	1.2912	0.27187	LT	-590	-588	-586	-1850	-1841	-1833	562	564	567
102036_at	P	P	P	A	481.683	322.345	641.022	615.5	391.213	839.787	452.633	324.313	580.954	455.467	354.303	556.63	0.782589	1.27781	0.341238	LT	1.06418	0.939691	0.943596	GT	1.05756	0.945573	0.990664	GT	1.35982	0.735391	0.303956	GT	1.35136	0.739995	0.288217	GT	0.993779	1.00626	0.939788	LT	399	401	402	1371	1377	1384	172	172	173
102038_at	P	P	P	A	84.7167	61.8615	107.572	86.8	62.1962	111.404	98.1667	72.1672	124.166	60.1667	37.0764	83.2569	0.975998	1.02459	0.835712	LT	0.862988	1.15876	0.469745	LT	1.40803	0.710211	0.224259	GT	0.884211	1.13095	0.590062	LT	1.44266	0.693164	0.214023	GT	1.63158	0.612903	0.11413	GT	1709	1719	1728	137	138	139	-616	-611	-606
102039_at	P	P	P	P	1947.23	1296.06	2598.41	1942.57	1146.6	2738.53	1755.97	1396.43	2115.5	1849.3	1371.55	2327.05	1.0024	0.997603	0.873131	GT	1.10892	0.901775	0.966209	GT	1.05296	0.949706	0.928931	GT	1.10627	0.903942	0.766563	GT	1.05043	0.951988	0.917149	GT	0.94953	1.05315	0.808436	LT	-331	-330	-329	-1105	-1100	-1094	100918	101400	101882
102040_at	P	A	A	P	1702.17	1451.25	1953.08	1504.3	912.629	2095.97	1392.07	1228.23	1555.9	1397.43	1315.43	1479.44	1.13153	0.883756	0.423993	GT	1.22276	0.81782	0.152064	GT	1.21807	0.820973	0.149436	GT	1.08062	0.925392	0.883289	GT	1.07647	0.928959	0.901984	GT	0.99616	1.00386	0.9264	LT	5308	5323	5337	-969	-966	-962	633	636	638
102042_at	P	A	P	A	447.033	264.605	629.462	365.5	291.637	439.363	439	331.632	546.368	329	274.208	383.792	1.22307	0.817612	0.86695	GT	1.0183	0.98203	0.792587	GT	1.35876	0.735963	0.679108	GT	0.832574	1.20109	0.36448	LT	1.11094	0.900137	0.503923	GT	1.33435	0.749431	0.152905	GT	-259	-258	-257	1125	1131	1138	789	794	798
102044_at	P	P	P	P	5042.85	3889.18	6196.52	5543	4488.95	6597.05	7866	5379.08	10352.9	5854.83	4350.69	7358.98	0.909769	1.09918	0.559465	LT	0.641095	1.55983	0.0838128	LT	0.861314	1.16102	0.436544	LT	0.704678	1.41909	0.18259	LT	0.946739	1.05626	0.778451	LT	1.34351	0.744322	0.267169	GT	297	298	299	1196	1202	1207	712	715	718
102046_at	P	A	P	P	290.017	182.855	397.178	221.533	0.492675	442.574	225.4	155.337	295.463	420.767	402.579	438.954	1.30913	0.763864	0.370241	GT	1.28668	0.777197	0.660397	GT	0.689258	1.45084	0.196332	LT	0.982845	1.01745	0.620386	LT	0.526499	1.89934	0.211187	LT	0.535689	1.86676	0.0136137	LT	663	668	672	173	175	177	-356	-353	-349
102047_at	P	P	P	P	5620.63	5297.34	5943.92	8485.2	7399.84	9570.56	8104.93	7370.18	8839.69	6877.2	5863.7	7890.7	0.662404	1.50965	0.00022025	LT	0.693483	1.442	0.000188027	LT	0.817285	1.22356	0.0193319	LT	1.04692	0.955185	0.604705	GT	1.23382	0.810494	0.10125	GT	1.17852	0.84852	0.133838	GT	2501	2504	2507	-670	-669	-668	1907	1910	1914
102048_at	P	P	P	P	1725.15	1020.39	2429.91	6187.17	4214.43	8159.9	7225.77	2737.8	11713.7	4296.57	2741.11	5852.02	0.278827	3.58645	0.00513266	LT	0.23875	4.18849	0.0130129	LT	0.401518	2.49055	0.0244524	LT	0.856264	1.16786	0.942004	LT	1.44003	0.694432	0.223072	GT	1.68175	0.594617	0.427773	GT	988	993	998	445	448	451	1582	1594	1606
102049_at	P	P	P	P	234.117	205.244	262.989	467.4	375.07	559.73	532.833	205.356	860.311	293.433	278.825	308.042	0.500891	1.99644	0.00045046	LT	0.439381	2.27593	0.00898675	LT	0.797853	1.25336	0.0335705	LT	0.877197	1.13999	0.870393	LT	1.59287	0.627799	0.0138567	GT	1.81586	0.550704	0.153012	GT	407	408	410	204	205	206	226	227	229
102052_at	P	P	P	P	1223.1	971.369	1474.83	1411.8	901.186	1922.41	1941.6	1288.92	2594.28	1634.5	1077.34	2191.66	0.866341	1.15428	0.491624	LT	0.629944	1.58744	0.0438304	LT	0.748302	1.33636	0.170669	LT	0.727132	1.37527	0.24799	LT	0.86375	1.15774	0.568123	LT	1.18789	0.841831	0.498857	GT	-995	-992	-989	-477	-475	-473	-1433	-1427	-1420
102054_at	P	P	P	P	1690.18	1389.59	1990.77	3617	3093.72	4140.28	2660.97	2641.23	2680.71	4119	3460.36	4777.64	0.467289	2.14	0.000541318	LT	0.635176	1.57437	0.00541718	LT	0.410338	2.43701	0.000220653	LT	1.35928	0.735683	0.0164505	GT	0.878126	1.13879	0.304339	LT	0.646022	1.54793	0.00564123	LT	621	622	624	-630	-627	-625	-1136	-1132	-1128
102056_f_at	P	P	P	P	3465.1	2742.86	4187.34	2236	1824.78	2647.22	3007.63	1883.9	4131.37	2044.07	1931.56	2156.57	1.54969	0.645292	0.0447028	GT	1.1521	0.867979	0.487296	GT	1.6952	0.589901	0.0174658	GT	0.743442	1.3451	0.253024	LT	1.0939	0.914162	0.434208	GT	1.4714	0.679626	0.12732	GT	669	670	672	-403	-402	-401	13354	13399	13445
102058_at	P	P	P	P	1086.22	957.649	1214.78	1119.33	882.575	1356.09	1199.37	680.92	1717.81	664.9	437.705	892.095	0.970414	1.03049	0.822	LT	0.905659	1.10417	0.701224	LT	1.63365	0.612125	0.00931296	GT	0.93327	1.0715	0.881613	LT	1.68346	0.594014	0.0638034	GT	1.80383	0.554376	0.101658	GT	-2085	-2080	-2075	-495	-493	-492	2305	2312	2320
102060_at	P	P	P	P	672.083	469.437	874.729	615.133	315.945	914.322	974.1	641.661	1306.54	1049.87	899.073	1200.66	1.09258	0.915263	0.822495	GT	0.689953	1.44937	0.19054	LT	0.640161	1.56211	0.0992487	LT	0.631489	1.58356	0.158887	LT	0.585916	1.70673	0.0716857	LT	0.927832	1.07778	0.612695	LT	293	294	295	2837	2853	2869	-1026	-1021	-1015
102062_at	P	A	P	P	1431.17	1171.51	1690.83	377.367	187.493	567.24	1126.53	743.128	1509.94	1439.73	721.563	2157.9	3.79251	0.263678	0.000824861	GT	1.27042	0.787143	0.231847	GT	0.99405	1.00599	0.827208	LT	0.33498	2.98525	0.0359869	LT	0.262109	3.81521	0.0385997	LT	0.78246	1.27802	0.624181	LT	1538	1545	1552	-194	-193	-192	1154	1161	1168
102063_at	P	P	P	P	338.567	255.768	421.365	305.6	203.153	408.047	243.433	223.338	263.529	358.133	277.281	438.986	1.10788	0.902629	0.661184	GT	1.3908	0.719012	0.143475	GT	0.945365	1.05779	0.694661	LT	1.25537	0.796575	0.365532	GT	0.853313	1.1719	0.470783	LT	0.679728	1.47118	0.0432726	LT	297	298	299	-2072	-2062	-2052	-765	-761	-757
102069_at	P	P	P	P	434.833	286.874	582.793	435.1	238.373	631.827	467.367	334.695	600.039	872.067	777.602	966.531	0.999387	1.00061	0.948973	LT	0.93039	1.07482	0.667326	LT	0.498624	2.00552	0.0176617	LT	0.930961	1.07416	0.736676	LT	0.49893	2.00429	0.0338479	LT	0.53593	1.86592	0.018606	LT	480	482	484	838	843	848	-227	-226	-224
102070_at	P	P	P	P	293.617	241.908	345.326	458.567	322.072	595.061	345.5	284.267	406.733	467.233	374.279	560.188	0.640292	1.56179	0.0323265	LT	0.849831	1.1767	0.258172	LT	0.628415	1.5913	0.0126931	LT	1.32726	0.753435	0.230656	GT	0.981451	1.0189	0.868761	LT	0.739459	1.35234	0.0969835	LT	-4064	-4053	-4042	267	269	270	-41985	-41824	-41663
102071_at	P	A	A	A	2374.67	2017.54	2731.8	1920.93	1373.99	2467.88	1965.9	1601.74	2330.06	2178.4	2003.85	2352.95	1.2362	0.808928	0.181249	GT	1.20793	0.827864	0.201937	GT	1.0901	0.91735	0.55208	GT	0.977127	1.02341	0.850643	LT	0.881809	1.13403	0.381038	LT	0.902451	1.10809	0.352602	LT	-10993	-10972	-10952	13083	13118	13153	9440	9465	9490
102072_g_at	P	P	P	P	2288.58	2110.98	2466.19	2081.73	1807.45	2356.02	2345.03	1908.67	2781.39	2230.07	1778.79	2681.35	1.09936	0.909617	0.226066	GT	0.975928	1.02467	0.820132	LT	1.02624	0.974431	0.722636	GT	0.88772	1.12648	0.365269	LT	0.933485	1.07125	0.626477	LT	1.05155	0.950974	0.721781	GT	1519	1523	1527	2661	2670	2679	540	542	543
102074_at	P	A	A	P	204.083	172.028	236.139	216.2	159.226	273.174	191.633	160.871	222.395	212.533	173.95	251.117	0.943956	1.05937	0.702107	LT	1.06497	0.938996	0.67552	GT	0.960242	1.0414	0.721085	LT	1.1282	0.886371	0.506713	GT	1.01725	0.98304	0.959152	GT	0.901662	1.10906	0.451017	LT	-1171	-1168	-1165	-542	-540	-538	1694	1701	1707
102081_at	P	A	A	A	133.467	91.2591	175.674	155.567	79.3633	231.77	120.367	84.1982	156.535	134.2	80.3323	188.068	0.857939	1.16558	0.585746	LT	1.10883	0.901848	0.748935	GT	0.994536	1.00549	0.976791	LT	1.29244	0.77373	0.489806	GT	1.15922	0.862653	0.701443	GT	0.89692	1.11493	0.785446	LT	171	171	172	161	162	163	-653	-649	-646
102083_at	P	A	A	A	151.117	101.865	200.368	216.5	188.34	244.66	116.533	81.8477	151.219	198.033	83.4743	312.592	0.697998	1.43267	0.133915	LT	1.29677	0.771148	0.45119	GT	0.763087	1.31047	0.524075	LT	1.85784	0.53826	0.0157532	GT	1.09325	0.914704	0.615125	GT	0.588453	1.69937	0.317191	LT	-536	-533	-531	278	280	282	-153	-152	-151
102090_f_at	P	P	P	P	490.25	412.803	567.697	789.733	556.877	1022.59	468.6	420.899	516.301	554.867	463.063	646.67	0.620779	1.61088	0.0177862	LT	1.0462	0.955839	0.791581	GT	0.883546	1.1318	0.329587	LT	1.6853	0.593365	0.0375056	GT	1.42328	0.7026	0.129325	GT	0.844527	1.18409	0.172605	LT	21691	21739	21787	-5978	-5960	-5941	1492	1497	1501
102091_f_at	P	P	A	P	112.083	89.302	134.865	156.667	135.816	177.517	77.4333	48.4768	106.39	146.267	127.418	165.116	0.715426	1.39777	0.0439869	LT	1.44748	0.690855	0.07412	GT	0.766294	1.30498	0.0881949	LT	2.02325	0.494255	0.0193551	GT	1.0711	0.933617	0.516277	GT	0.529398	1.88894	0.0263378	LT	546	547	549	2227	2236	2245	-401	-400	-398
102092_s_at	A	P	A	A	22.9	15.6287	30.1713	143.433	20.8969	265.97	16.6333	6.37557	26.8911	12.8667	8.7705	16.9628	0.159656	6.26346	0.0379726	LT	1.37675	0.726346	0.313375	GT	1.77979	0.561863	0.0883535	GT	8.62325	0.115966	0.0989451	GT	11.1477	0.0897049	0.0687067	GT	1.29275	0.773547	0.588918	GT	125	126	127	136	137	139	-360	-356	-353
102093_f_at	P	P	P	P	736.667	598.717	874.616	682.2	496.351	868.049	758.7	661.53	855.87	586.633	355.21	818.057	1.07984	0.926063	0.667058	GT	0.970959	1.02991	0.749543	LT	1.25575	0.796335	0.25335	GT	0.89917	1.11214	0.458037	LT	1.16291	0.859914	0.533162	GT	1.29331	0.773209	0.278192	GT	156	157	157	-17443	-17371	-17298	198	199	200
102094_f_at	P	P	P	P	4301.92	4068.09	4535.75	1912.03	1453.06	2371.01	2991.03	2651.97	3330.09	2726.27	2490.81	2961.73	2.24992	0.444461	5.55958e-05	GT	1.43827	0.695279	0.000292507	GT	1.57795	0.633733	4.02427e-05	GT	0.639255	1.56432	0.0326129	LT	0.701338	1.42585	0.0571614	LT	1.09712	0.91148	0.273638	GT	864	866	868	2075	2081	2087	1548	1552	1557
102098_at	P	P	P	P	30068.4	24407.5	35729.3	35751.3	26883.7	44618.8	29658.4	28003.9	31312.9	28407.1	27723.4	29090.8	0.841045	1.189	0.325366	LT	1.01382	0.986364	0.950676	GT	1.05848	0.94475	0.825829	GT	1.20543	0.829576	0.286977	GT	1.25853	0.794577	0.193457	GT	1.04405	0.957811	0.246139	GT	-1172	-1170	-1168	-711	-709	-707	-1111	-1108	-1105
102099_f_at	P	P	P	P	684.65	622.337	746.963	560.9	466.181	655.619	559.333	435.293	683.374	538.367	431.508	645.225	1.22063	0.819251	0.0510529	GT	1.22405	0.816962	0.0707525	GT	1.27172	0.786339	0.0357029	GT	1.0028	0.997207	0.955542	GT	1.04185	0.959826	0.754633	GT	1.03894	0.962515	0.82341	GT	-1183	-1181	-1178	-889	-886	-883	21540	21615	21689
102100_f_at	A	A	P	A	30.5667	12.068	49.0653	72.2667	18.2138	126.32	74.1667	60.4514	87.8819	66.8333	57.7346	75.9321	0.42297	2.36423	0.139481	LT	0.412135	2.42639	0.0824622	LT	0.457357	2.18648	0.104608	LT	0.974382	1.02629	0.70435	LT	1.0813	0.924815	0.898067	GT	1.10973	0.901124	0.454348	GT	-117	-116	-115	-1561	-1543	-1526	490	495	501
102101_f_at	P	A	P	P	173.6	140.416	206.784	106.033	8.88688	203.18	195.133	157.085	233.182	213.7	133.065	294.335	1.63722	0.610791	0.100815	GT	0.889648	1.12404	0.465778	LT	0.812354	1.23099	0.374066	LT	0.543389	1.8403	0.182786	LT	0.496178	2.0154	0.175602	LT	0.913118	1.09515	0.7891	LT	1073	1077	1081	-2359	-2346	-2333	-2248	-2236	-2223
102102_at	P	P	P	P	565.85	280.4	851.3	306.767	143.936	469.597	1338.43	495.855	2181.01	743.6	351.154	1136.05	1.84456	0.542134	0.363585	GT	0.42277	2.36535	0.125117	LT	0.76096	1.31413	0.447914	LT	0.229198	4.36303	0.0487187	LT	0.412543	2.42399	0.100388	LT	1.79994	0.555575	0.35695	GT	183	184	186	274	277	280	340	343	347
102103_f_at	P	P	P	P	15952.5	10604.9	21300.2	14778.1	9579.04	19977.2	14359.3	10096.8	18621.7	11331.2	9211.85	13450.6	1.07947	0.92638	0.887396	GT	1.11096	0.900125	0.823895	GT	1.40784	0.710308	0.286335	GT	1.02917	0.971659	0.931417	GT	1.3042	0.766756	0.279593	GT	1.26723	0.789121	0.271073	GT	1113	1116	1120	-1812	-1805	-1797	-840	-836	-833
102108_f_at	P	P	P	P	1971.13	1403.37	2538.89	1046.37	961.759	1130.97	1634.57	1065.03	2204.11	1574.67	1369.93	1779.41	1.88379	0.530845	0.0359427	GT	1.20591	0.829252	0.536438	GT	1.25178	0.798864	0.46908	GT	0.640149	1.56214	0.080987	LT	0.6645	1.50489	0.00705245	LT	1.03804	0.963354	0.956088	GT	-384	-382	-381	-210	-209	-208	605	608	612
102109_at	P	P	P	P	42684.5	35019.5	50349.5	58656.9	40627.5	76686.3	38395.3	35070.3	41720.3	35699.6	31068.7	40330.5	0.727698	1.3742	0.0995081	LT	1.11171	0.899515	0.526299	GT	1.19566	0.836359	0.26868	GT	1.52771	0.654575	0.0706013	GT	1.64307	0.608617	0.0495558	GT	1.07551	0.929789	0.402581	GT	112988	113223	113458	2805	2814	2822	-1239	-1235	-1232
102111_f_at	P	A	A	A	236.967	190.238	283.695	162.6	98.8843	226.316	163.133	124.148	202.119	208.667	100.946	316.388	1.45736	0.686172	0.0895399	GT	1.4526	0.688423	0.0723146	GT	1.13562	0.880574	0.477041	GT	0.996731	1.00328	0.916014	LT	0.779233	1.28331	0.523319	LT	0.781789	1.27912	0.524383	LT	326	328	329	318	319	321	-1230	-1223	-1217
102113_f_at	P	P	P	P	1290.7	1029.97	1551.43	1750.93	1284.96	2216.9	1136.13	1099.02	1173.25	1253.53	1083.14	1423.92	0.73715	1.35658	0.131776	LT	1.13605	0.880246	0.548964	GT	1.02965	0.971204	0.972741	GT	1.54113	0.648873	0.0458233	GT	1.3968	0.715923	0.115295	GT	0.906345	1.10333	0.257307	LT	903	906	908	435	436	438	450	451	453
102114_f_at	P	A	A	P	1100.57	881.041	1320.09	415.267	358.742	471.791	333.367	192.389	474.344	657.133	433.999	880.268	2.65026	0.377321	0.000348721	GT	3.30137	0.302905	0.000486033	GT	1.6748	0.597086	0.0249645	GT	1.24568	0.802777	0.314794	GT	0.631937	1.58244	0.0924225	LT	0.507304	1.9712	0.0702404	LT	359	360	362	-436	-434	-431	207	208	209
102117_at	P	A	A	A	700.517	625.759	775.274	363.767	287.299	440.234	408.867	319.664	498.069	279.433	204.5	354.367	1.92573	0.519283	0.000439553	GT	1.71331	0.583664	0.00139599	GT	2.50692	0.398896	0.000144141	GT	0.889695	1.12398	0.486448	LT	1.3018	0.768166	0.209154	GT	1.4632	0.683434	0.100335	GT	-90018	-89666	-89313	230	231	232	288	290	291
102118_at	P	P	P	P	141.917	111.753	172.081	156.367	117.214	195.52	135.533	92.1522	178.914	193.033	184.841	201.226	0.907589	1.10182	0.560176	LT	1.0471	0.955021	0.845488	GT	0.735193	1.36019	0.082248	LT	1.15371	0.866766	0.481434	GT	0.81005	1.23449	0.143279	LT	0.702124	1.42425	0.0715608	LT	555	557	559	1980	1990	2000	-593	-590	-587
102120_f_at	P	A	P	A	373.55	267.672	479.428	395.833	211.269	580.398	350.5	270.139	430.861	331.4	220.606	442.194	0.943705	1.05965	0.844442	LT	1.06576	0.938295	0.899922	GT	1.12719	0.887164	0.684613	GT	1.12934	0.885474	0.776224	GT	1.19443	0.837221	0.628245	GT	1.05763	0.945506	0.751186	GT	244	245	246	368	371	373	-456	-453	-450
102123_at	P	A	P	P	617.55	459.316	775.784	319.433	39.1038	599.763	560.767	442.804	678.73	770.633	556.327	984.94	1.93327	0.517259	0.109406	GT	1.10126	0.908051	0.826743	GT	0.801354	1.24789	0.33079	LT	0.569637	1.7555	0.286337	LT	0.414508	2.4125	0.183398	LT	0.72767	1.37425	0.15037	LT	1209	1216	1223	-167	-166	-165	-1558	-1546	-1533
102124_f_at	P	P	P	P	691.367	439.105	943.628	742.733	370.323	1115.14	572.433	423.631	721.236	483.5	319.842	647.158	0.930841	1.0743	0.839086	LT	1.20777	0.827974	0.654152	GT	1.42992	0.699339	0.307226	GT	1.2975	0.770712	0.590173	GT	1.53616	0.650974	0.340802	GT	1.18394	0.84464	0.44386	GT	-602	-600	-597	-532	-529	-526	948	953	958
102125_f_at	P	P	P	P	194.383	154.915	233.851	263.833	223.687	303.98	213.5	153.275	273.725	275	197.084	352.916	0.736766	1.35728	0.0708601	LT	0.910461	1.09835	0.596081	LT	0.706848	1.41473	0.0763008	LT	1.23575	0.809223	0.248133	GT	0.959394	1.04232	0.867204	LT	0.776364	1.28806	0.276769	LT	1292	1296	1299	-1088	-1084	-1079	-783	-780	-777
102126_at	P	P	P	P	29620.1	25978.4	33261.7	33932.2	26102.4	41762.1	33737.2	30124	37350.3	25949.7	23676.1	28223.3	0.872919	1.14558	0.314259	LT	0.877966	1.139	0.192947	LT	1.14144	0.876084	0.219186	GT	1.00578	0.994251	0.965219	GT	1.30762	0.76475	0.126681	GT	1.3001	0.769171	0.0201679	GT	18538	18570	18601	-9185	-9163	-9141	-9857	-9833	-9810
102128_f_at	P	P	P	P	2907.97	2296.89	3519.05	1672.87	1248.56	2097.18	2100.53	600.974	3600.09	1662.83	1344.41	1981.26	1.73831	0.57527	0.0210111	GT	1.38439	0.722337	0.179672	GT	1.7488	0.57182	0.0182416	GT	0.796401	1.25565	0.779948	LT	1.00603	0.994002	0.998265	GT	1.26323	0.791624	0.775563	GT	2650	2661	2671	-2264	-2252	-2239	586	589	592
102130_f_at	P	P	P	P	616.717	472.854	760.579	648.8	494.597	803.003	692.2	590.957	793.443	952	677.041	1226.96	0.95055	1.05202	0.731171	LT	0.890952	1.1224	0.456443	LT	0.647812	1.54366	0.0672875	LT	0.937301	1.06689	0.639494	LT	0.681513	1.46732	0.137681	LT	0.727101	1.37533	0.155855	LT	2090	2096	2102	1425	1431	1437	993	996	1000
102131_f_at	P	A	P	A	1312.77	985.309	1640.22	800.467	331.435	1269.5	1212.33	909.405	1515.26	1038.77	843.589	1233.94	1.64	0.609755	0.0826529	GT	1.08284	0.923495	0.784997	GT	1.26377	0.791281	0.325401	GT	0.660269	1.51453	0.214037	LT	0.770593	1.2977	0.342923	LT	1.16709	0.856833	0.417845	GT	354	355	356	-517	-515	-512	1057	1062	1067
102134_f_at	P	P	P	P	3966.25	3567.46	4365.04	3593.8	3165.41	4022.19	3871.73	3509.43	4234.03	3336.57	3158.24	3514.89	1.10364	0.906095	0.29784	GT	1.02441	0.97617	0.813422	GT	1.18872	0.84124	0.0663429	GT	0.928215	1.07734	0.386594	LT	1.0771	0.928423	0.357895	GT	1.16039	0.861776	0.0539055	GT	-852	-850	-849	-1200	-1198	-1195	-112644	-112395	-112146
102137_f_at	P	P	P	P	1312.28	1047.43	1577.13	805.467	734.505	876.428	1099.43	845.314	1353.55	1137.03	934.841	1339.23	1.62922	0.61379	0.0181433	GT	1.1936	0.837802	0.356442	GT	1.15413	0.866454	0.45876	GT	0.73262	1.36496	0.0735716	LT	0.708393	1.41165	0.0316258	LT	0.966931	1.0342	0.808967	LT	1807	1812	1817	-1922	-1915	-1908	-852	-849	-846
102141_f_at	P	P	P	P	668.6	451.897	885.303	786.533	587.62	985.447	791.6	570.09	1013.11	627.967	570.629	685.305	0.850059	1.17639	0.425483	LT	0.844618	1.18397	0.412752	LT	1.06471	0.939226	0.994054	GT	0.993599	1.00644	0.978563	LT	1.25251	0.798398	0.226946	GT	1.26058	0.793288	0.211462	GT	707	709	711	1725	1731	1736	1401	1406	1411
102142_r_at	A	A	A	P	78.7833	56.04	101.527	65.6333	10.5288	120.738	68.9667	32.6764	105.257	102.667	82.1427	123.191	1.20036	0.833087	0.367273	GT	1.14234	0.875397	0.577725	GT	0.76737	1.30315	0.212248	LT	0.951667	1.05079	0.712857	LT	0.639286	1.56425	0.320145	LT	0.671753	1.48864	0.236804	LT	4095	4118	4140	-206	-205	-203	-181	-180	-178
102143_at	P	P	A	P	515.667	426.288	605.045	461.467	309.22	613.713	393.2	301.457	484.943	624.233	582.554	665.913	1.11745	0.894893	0.519164	GT	1.31146	0.762508	0.133519	GT	0.82608	1.21054	0.167437	LT	1.17362	0.852066	0.545284	GT	0.739253	1.35272	0.145089	LT	0.629893	1.58757	0.0191158	LT	-2856	-2846	-2837	2113	2123	2133	-530	-528	-525
102144_f_at	P	P	P	P	605.083	399.141	811.026	232.7	122.208	343.192	192.7	152.558	232.842	461.033	338.919	583.147	2.60027	0.384575	0.0451923	GT	3.14003	0.318469	0.0187998	GT	1.31245	0.761934	0.615031	GT	1.20758	0.828105	0.621336	GT	0.504736	1.98123	0.0629468	LT	0.417974	2.39249	0.00898572	LT	634	637	639	523	526	529	475	478	481
102152_f_at	P	P	P	P	711.083	633.645	788.522	741.667	504.463	978.87	729.267	647.992	810.541	1096.83	913.536	1280.13	0.958764	1.04301	0.852079	LT	0.975066	1.02557	0.753049	LT	0.648306	1.54248	0.00381344	LT	1.017	0.983281	0.978898	GT	0.676189	1.47888	0.0838569	LT	0.664884	1.50402	0.0191227	LT	-26632	-26554	-26476	831	835	838	-1289	-1284	-1279
102161_f_at	P	P	P	P	1349.52	730.725	1968.31	3822.17	3079.9	4564.44	1901.77	1682.55	2120.99	2958.17	2478.24	3438.09	0.353076	2.83225	0.0116954	LT	0.709612	1.40922	0.208231	LT	0.4562	2.19202	0.0324895	LT	2.0098	0.497562	0.00425968	GT	1.29207	0.77395	0.131423	GT	0.642887	1.55548	0.0141466	LT	-301	-299	-298	-810	-805	-800	-1711	-1700	-1690
102171_r_at	P	P	P	P	445.467	384.243	506.69	390.867	241.692	540.041	439.067	362.216	515.917	512.633	358.705	666.562	1.13969	0.877432	0.358083	GT	1.01458	0.985633	0.930689	GT	0.868977	1.15078	0.381945	LT	0.890222	1.12332	0.520225	LT	0.762468	1.31153	0.295337	LT	0.856493	1.16755	0.460575	LT	-1023	-1020	-1017	-252	-251	-250	-325	-324	-323
102193_at	P	P	P	P	714.65	522.807	906.493	506.933	469.184	544.682	641.633	552.637	730.629	1010.83	745.517	1276.15	1.40975	0.709345	0.19155	GT	1.1138	0.897829	0.765912	GT	0.706991	1.41445	0.139655	LT	0.790067	1.26572	0.0425757	LT	0.5015	1.99402	0.0110851	LT	0.634757	1.57541	0.0523641	LT	115	115	115	580	582	585	484	486	488
102194_at	P	P	P	P	1276.02	937.371	1614.66	1220.57	1004.52	1436.61	914.267	843.921	984.612	1197.6	1117.72	1277.48	1.04543	0.956544	0.966456	GT	1.39567	0.716501	0.177863	GT	1.06548	0.938546	0.91736	GT	1.33502	0.749051	0.0453125	GT	1.01918	0.981184	0.906095	GT	0.763416	1.3099	0.00693393	LT	263	264	264	-1191	-1187	-1183	-480	-479	-477
102195_at	P	P	P	P	1118.67	1021.76	1215.57	735.833	562.401	909.266	819.1	538.458	1099.74	889	780.268	997.732	1.52027	0.657777	0.00368812	GT	1.36573	0.732211	0.0348597	GT	1.25834	0.794696	0.0200655	GT	0.898344	1.11316	0.679217	LT	0.827709	1.20815	0.204258	LT	0.921372	1.08534	0.58334	LT	669	670	672	-974	-971	-967	1657	1663	1669
102196_at	P	P	P	P	501.183	344.287	658.079	270.333	184.768	355.899	188	106.365	269.635	350.633	264.216	437.051	1.85395	0.53939	0.0362205	GT	2.66587	0.375112	0.00691193	GT	1.42937	0.699611	0.178376	GT	1.43794	0.695438	0.281177	GT	0.770986	1.29704	0.280047	LT	0.536173	1.86507	0.0830388	LT	162	162	163	225	226	228	521	525	528
102197_at	P	A	P	A	134.7	91.3777	178.022	135.033	6.06677	264	54.8667	10.1106	99.6227	97.6	83.1002	112.1	0.997531	1.00247	0.581347	LT	2.45504	0.407325	0.0613803	GT	1.38012	0.724573	0.370547	GT	2.46112	0.406319	0.42502	GT	1.38354	0.722784	0.946819	GT	0.562158	1.77886	0.262153	LT	-521	-517	-513	445	450	454	-164	-162	-161
102198_at	P	P	P	P	1099.95	710.968	1488.93	912.6	620.364	1204.84	883.967	771.846	996.087	1196.43	1105.53	1287.34	1.20529	0.829674	0.593693	GT	1.24433	0.803643	0.544142	GT	0.919358	1.08772	0.542137	LT	1.03239	0.968624	0.979816	GT	0.762767	1.31102	0.182044	LT	0.738835	1.35348	0.0161436	LT	-1670	-1665	-1659	-365	-364	-362	558	561	563
102199_at	P	P	P	P	1715.13	1040.31	2389.96	3161.97	1902.1	4421.83	2174.47	2018.34	2330.59	2184.3	2080.77	2287.83	0.542426	1.84357	0.120364	LT	0.78876	1.26781	0.357698	LT	0.78521	1.27355	0.351051	LT	1.45413	0.687694	0.163987	GT	1.44759	0.690804	0.166161	GT	0.995498	1.00452	0.910163	LT	-724	-721	-719	785	789	793	268	269	271
102201_s_at	P	P	P	P	1952.98	1641.95	2264.02	1641.07	1404.57	1877.57	1831.83	1554.35	2109.32	2045.1	1913.58	2176.62	1.19007	0.840287	0.262727	GT	1.06614	0.937967	0.706249	GT	0.954957	1.04717	0.635577	LT	0.89586	1.11625	0.373467	LT	0.802438	1.2462	0.0491278	LT	0.895718	1.11642	0.257212	LT	-1363	-1360	-1357	-9951	-9919	-9886	456	458	459
102202_s_at	P	P	P	P	514.95	337.585	692.315	507.267	228.769	785.764	460.4	418.15	502.65	299.2	260.026	338.374	1.01515	0.985079	0.983408	GT	1.11848	0.894067	0.909294	GT	1.72109	0.581027	0.135785	GT	1.1018	0.907609	0.929427	GT	1.69541	0.589828	0.169535	GT	1.53877	0.64987	0.00566825	GT	-725	-722	-720	693	697	701	-241	-239	-238
102209_at	P	A	P	P	407.033	361.326	452.741	191.667	92.8421	290.491	351.133	325.707	376.56	408.7	352.756	464.644	2.12365	0.470887	0.00365814	GT	1.1592	0.862665	0.149222	GT	0.995922	1.00409	0.93893	LT	0.545852	1.832	0.0632277	LT	0.468967	2.13235	0.0382283	LT	0.859147	1.16395	0.129175	LT	627	630	632	-241	-240	-238	448	450	452
102210_at	P	A	A	A	587.5	475.803	699.197	516.567	419.628	613.505	599.967	429.232	770.701	402.6	345.468	459.732	1.13732	0.879262	0.458837	GT	0.979221	1.02122	0.908347	LT	1.45926	0.685277	0.0379962	GT	0.860992	1.16145	0.496725	LT	1.28308	0.779377	0.115577	GT	1.49023	0.671037	0.0871324	GT	-608	-606	-604	-3697	-3681	-3664	1675	1682	1690
102211_r_at	P	P	P	P	134.35	76.2754	192.425	132.033	71.3077	192.759	115.567	58.4847	172.649	171.2	150.548	191.852	1.01755	0.982756	0.931848	GT	1.16253	0.860191	0.725197	GT	0.784755	1.27428	0.271879	LT	1.14249	0.875284	0.703271	GT	0.771223	1.29664	0.273646	LT	0.675039	1.4814	0.189575	LT	161	162	162	165	166	167	852	858	864
102213_at	P	P	P	P	149.367	120.195	178.538	348.033	222.295	473.772	270.667	126.562	414.771	169.033	121.249	216.818	0.429173	2.33006	0.00285327	LT	0.551847	1.8121	0.0548956	LT	0.883652	1.13167	0.474442	LT	1.28584	0.777703	0.428655	GT	2.05896	0.485681	0.0359153	GT	1.60126	0.624507	0.261218	GT	-454	-452	-450	1755	1767	1778	734	739	744
102215_at	P	P	P	P	597.717	437.084	758.349	432.067	187.583	676.55	519.6	406.29	632.91	690.8	492.198	889.402	1.38339	0.722862	0.332139	GT	1.15034	0.869308	0.768861	GT	0.865253	1.15573	0.514749	LT	0.831537	1.20259	0.458073	LT	0.625458	1.59883	0.17642	LT	0.752171	1.32948	0.192194	LT	5783	5807	5832	-4303	-4277	-4252	-590	-587	-583
102217_at	P	P	P	P	1073.27	975.682	1170.85	472.4	387.445	557.355	741.567	717.426	765.707	725.967	660.12	791.813	2.27194	0.440152	3.76018e-05	GT	1.4473	0.690944	0.00112237	GT	1.4784	0.676408	0.00126	GT	0.63703	1.56979	0.00729158	LT	0.650719	1.53676	0.0126314	LT	1.02149	0.978963	0.667253	GT	434	435	436	423	424	426	1331	1336	1340
102218_at	A	P	P	P	42.0833	23.43	60.7367	3414.53	1104.67	5724.4	392.3	52.5086	732.091	1141.83	719.889	1563.78	0.0123248	81.1374	2.28447e-05	LT	0.107273	9.32198	0.00204468	LT	0.0368559	27.1327	1.40823e-05	LT	8.70388	0.114891	0.0349409	GT	2.9904	0.334404	0.14658	GT	0.34357	2.91061	0.0764383	LT	65	66	67	298	304	309	-277	-272	-267
102219_at	P	A	A	A	391.15	332.938	449.362	76.5667	32.8258	120.308	267.9	80.2874	455.513	263.667	141.006	386.328	5.10862	0.195748	8.07127e-05	GT	1.46006	0.684903	0.148596	GT	1.4835	0.674081	0.0488074	GT	0.285803	3.49891	0.126765	LT	0.290392	3.44362	0.0221213	LT	1.01606	0.984198	0.809304	GT	-467	-464	-461	177	178	180	-257	-254	-252
102222_at	P	A	P	P	215.433	153.176	277.691	178.2	53.5315	302.868	205.167	112.073	298.261	255.167	232.602	277.731	1.20894	0.82717	0.533242	GT	1.05004	0.952344	0.937657	GT	0.844285	1.18443	0.41461	LT	0.868562	1.15133	0.63353	LT	0.698367	1.43191	0.225856	LT	0.80405	1.2437	0.306762	LT	169	170	171	205	206	208	-367	-364	-361
102223_at	P	P	P	P	1834.75	1728.35	1941.15	640.633	586.881	694.386	957.267	583.193	1331.34	1038.3	753.43	1323.17	2.86396	0.349167	2.01e-07	GT	1.91666	0.521742	0.00117247	GT	1.76707	0.565908	0.000725816	GT	0.669232	1.49425	0.128681	LT	0.617002	1.62074	0.0349388	LT	0.921956	1.08465	0.697526	LT	-4632	-4621	-4609	1418	1423	1429	-795	-792	-789
102224_at	P	P	P	P	1840	1452.59	2227.41	1112.83	600.221	1625.45	2493.33	2299.55	2687.12	1779.5	1387.91	2171.09	1.65344	0.604801	0.0545894	GT	0.737968	1.35507	0.082957	LT	1.034	0.96712	0.927211	GT	0.446324	2.24053	0.0272943	LT	0.625363	1.59907	0.137482	LT	1.40114	0.713703	0.0497132	GT	563	565	568	-7993	-7946	-7900	921	927	932
102228_at	P	P	P	P	408.333	347.261	469.406	479.067	300.873	657.26	463.533	368.661	558.405	455.233	342.664	567.802	0.852352	1.17322	0.405939	LT	0.880915	1.13518	0.349956	LT	0.896976	1.11486	0.476118	LT	1.03351	0.967576	0.959845	GT	1.05235	0.95025	0.882709	GT	1.01823	0.982094	0.897037	GT	-812	-810	-808	-245548	-244752	-243957	-2640	-2631	-2623
102229_at	P	P	P	P	733.467	544.037	922.896	1055.13	613.263	1497	2031.8	1994.31	2069.29	1370.37	1186.39	1554.34	0.695141	1.43856	0.196491	LT	0.360994	2.77013	0.00142411	LT	0.535234	1.86834	0.016857	LT	0.51931	1.92563	0.0339392	LT	0.769964	1.29876	0.259032	LT	1.48267	0.674459	0.0043076	GT	203298	204089	204879	-463	-461	-458	-782	-778	-774
102230_at	A	A	P	A	148.783	131.856	165.711	151.967	108.927	195.007	336.633	107.698	565.569	131.033	91.1729	170.894	0.979052	1.0214	0.957992	LT	0.441974	2.26257	0.0378812	LT	1.13546	0.880699	0.308031	GT	0.451431	2.21518	0.179667	LT	1.15976	0.86225	0.522193	GT	2.56907	0.389246	0.117522	GT	241	242	243	-208	-206	-204	1740	1753	1766
102231_at	P	A	P	P	2159.03	1873.99	2444.07	1941	1435.89	2446.11	2357.77	1552.89	3162.64	1904.23	1275.78	2532.68	1.11233	0.899013	0.425885	GT	0.915711	1.09205	0.706395	LT	1.13381	0.881984	0.385985	GT	0.823237	1.21472	0.497674	LT	1.01931	0.981058	0.888512	GT	1.23817	0.807643	0.480619	GT	-1562	-1558	-1554	1606	1612	1618	-5366	-5347	-5328
102232_at	P	P	P	P	534.033	388.639	679.427	373.633	265.821	481.446	462.267	351.054	573.479	488.867	300.26	677.473	1.4293	0.699644	0.197014	GT	1.15525	0.865614	0.638328	GT	1.09239	0.915424	0.751959	GT	0.808264	1.23722	0.331928	LT	0.764285	1.30841	0.406068	LT	0.945588	1.05754	0.919054	LT	-737	-734	-731	-10048	-9993	-9938	1445	1453	1461
102233_at	P	P	P	P	235.6	167.225	303.975	219.7	81.5769	357.823	227.033	162.613	291.453	130.533	111.07	149.997	1.07237	0.932513	0.701011	GT	1.03773	0.963639	0.990233	GT	1.8049	0.554046	0.0436524	GT	0.967699	1.03338	0.75644	LT	1.68309	0.594144	0.279481	GT	1.73927	0.574952	0.0283425	GT	143	144	145	768	774	781	-808	-801	-794
102242_at	P	P	P	P	404.217	321.662	486.772	363.733	287.222	440.245	433.833	348.41	519.256	382.5	328.11	436.89	1.1113	0.899847	0.621841	GT	0.931733	1.07327	0.616106	LT	1.05678	0.946275	0.849452	GT	0.838417	1.19272	0.281343	LT	0.950937	1.05159	0.682187	LT	1.1342	0.881675	0.378625	GT	-428	-427	-426	369	370	372	-500	-498	-496
102247_at	P	A	P	P	136.367	109.592	163.141	105.2	33.4546	176.945	176.067	154.749	197.384	240.367	195.598	285.135	1.29626	0.77145	0.2482	GT	0.774517	1.29113	0.0971903	LT	0.567328	1.76265	0.00619514	LT	0.597501	1.67364	0.202808	LT	0.437665	2.28485	0.0944593	LT	0.732492	1.3652	0.0498241	LT	819	823	827	-277	-276	-274	-462	-459	-456
102249_at	P	P	A	A	810.1	101.946	1518.25	1251.33	275.187	2227.48	389.633	274.596	504.671	452.567	190.591	714.542	0.647389	1.54467	0.290803	LT	2.07913	0.480969	0.528108	GT	1.79001	0.558655	0.647388	GT	3.21157	0.311375	0.0595288	GT	2.76497	0.361668	0.108229	GT	0.860941	1.16152	0.781409	LT	-339	-337	-334	-1315	-1301	-1287	-305	-302	-299
102250_at	P	P	P	P	953.3	869.32	1037.28	943.733	825.194	1062.27	1135.1	773.44	1496.76	1069.27	993.071	1145.46	1.01014	0.989965	0.912943	GT	0.839838	1.19071	0.295331	LT	0.891546	1.12165	0.140279	LT	0.83141	1.20278	0.441267	LT	0.882599	1.13302	0.15925	LT	1.06157	0.942002	0.867562	GT	9401	9422	9443	594	596	598	-1352	-1347	-1343
102252_at	P	P	P	P	2668.13	2171.98	3164.28	4766.63	4530.27	5002.99	2451.5	2242.39	2660.61	2405.8	2240.86	2570.74	0.559752	1.7865	0.00368718	LT	1.08837	0.918807	0.668773	GT	1.10904	0.901679	0.581728	GT	1.94437	0.514304	0.000176288	GT	1.98131	0.504717	9.47116e-05	GT	1.019	0.981358	0.75933	GT	749	751	752	1142	1145	1148	-1184	-1180	-1177
102255_at	P	P	P	P	1736	1331.01	2140.99	2960.57	1588.78	4332.35	1585.77	1434.44	1737.09	1886.77	1605.75	2167.78	0.586374	1.7054	0.0630661	LT	1.09474	0.91346	0.675832	GT	0.920093	1.08685	0.512602	LT	1.86696	0.535629	0.103306	GT	1.56912	0.637299	0.224636	GT	0.840468	1.18981	0.125827	LT	107	107	107	409	411	413	841	845	848
102256_at	P	A	P	P	955.4	699.594	1211.21	517.067	318.947	715.187	1003.7	884.03	1123.37	845.1	689.582	1000.62	1.84773	0.541204	0.0509415	GT	0.951878	1.05055	0.674425	LT	1.13052	0.884551	0.739217	GT	0.515161	1.94114	0.0283558	LT	0.611841	1.63441	0.0770879	LT	1.18767	0.841985	0.197273	GT	6053	6075	6098	-3181	-3164	-3147	428	430	433
102257_at	P	A	A	P	648.45	427.971	868.929	505.9	162.7	849.1	593.333	552.96	633.707	714.233	556.339	872.128	1.28178	0.780168	0.50446	GT	1.09289	0.915002	0.985001	GT	0.907897	1.10145	0.588654	LT	0.85264	1.17283	0.451825	LT	0.708312	1.41181	0.265078	LT	0.830728	1.20376	0.232212	LT	-14164	-14103	-14042	-643	-639	-635	-1842	-1831	-1819
102259_at	P	P	P	P	495.067	285.236	704.897	888.9	252.233	1525.57	889.6	419.982	1359.22	978.333	709.054	1247.61	0.556943	1.79552	0.293585	LT	0.556505	1.79693	0.277744	LT	0.506031	1.97616	0.173299	LT	0.999213	1.00079	0.959394	LT	0.908586	1.10061	0.613939	LT	0.909302	1.09975	0.655198	LT	-297	-295	-293	-281	-278	-276	-563	-558	-553
102263_at	P	P	P	P	627.117	351.329	902.905	1059.67	523.603	1595.73	1132.83	528.293	1737.37	962.333	672.538	1252.13	0.591806	1.68974	0.201584	LT	0.553582	1.80642	0.178416	LT	0.651663	1.53454	0.186266	LT	0.935413	1.06905	0.916922	LT	1.10114	0.908147	0.924789	GT	1.17717	0.849492	0.829758	GT	107	107	108	391	394	397	558	562	567
102268_at	P	P	P	P	737.033	658.155	815.911	906	684.281	1127.72	626.067	597.647	654.486	633.6	491.884	775.316	0.813503	1.22925	0.127716	LT	1.17724	0.849441	0.0854786	GT	1.16325	0.859663	0.189474	GT	1.44713	0.691023	0.0540223	GT	1.42992	0.699338	0.111182	GT	0.98811	1.01203	0.993939	LT	568	569	571	-643	-640	-638	1154	1158	1162
102271_at	P	P	P	P	1890	1387.78	2392.22	1483.1	947.895	2018.3	1552.87	1278.37	1827.37	1352.1	1260.41	1443.79	1.27436	0.784709	0.330349	GT	1.2171	0.821623	0.441698	GT	1.39783	0.715397	0.168104	GT	0.955072	1.04704	0.738175	LT	1.09689	0.911671	0.741356	GT	1.14849	0.870712	0.233815	GT	-802	-800	-797	-9597	-9555	-9513	1395	1401	1407
102273_at	P	P	P	P	406.15	363.559	448.741	394	340.807	447.193	298.1	244.69	351.51	443.8	339.242	548.358	1.03084	0.970085	0.763839	GT	1.36246	0.733965	0.016758	GT	0.915164	1.0927	0.491228	LT	1.3217	0.756599	0.0750832	GT	0.887787	1.1264	0.48186	LT	0.671699	1.48876	0.0647343	LT	-2187	-2182	-2178	-2906	-2897	-2889	-381	-379	-378
102277_at	P	P	P	P	204.033	114.837	293.23	302.033	83.1355	520.931	353.533	180.537	526.529	565.5	445.168	685.832	0.675533	1.48031	0.375028	LT	0.577126	1.73272	0.161672	LT	0.360802	2.77161	0.0202183	LT	0.854328	1.17051	0.614913	LT	0.5341	1.87231	0.106044	LT	0.625169	1.59957	0.114844	LT	122	123	124	824	832	840	2661	2685	2710
102278_at	P	P	P	P	525.533	470.3	580.767	776.167	655.842	896.491	586.9	529.472	644.328	641.2	553.666	728.734	0.677088	1.47691	0.00409865	LT	0.895439	1.11677	0.215935	LT	0.819609	1.22009	0.0641657	LT	1.32249	0.756152	0.0393816	GT	1.21049	0.826111	0.146993	GT	0.915315	1.09252	0.380324	LT	-403	-403	-402	1465	1469	1473	1396	1400	1405
102279_at	A	P	P	P	308.883	242.203	375.563	3666.7	3030.32	4303.08	645.067	420.809	869.324	1566.7	1426.98	1706.42	0.0842401	11.8708	3.8e-06	LT	0.478839	2.08838	0.0114187	LT	0.197155	5.07214	4.69783e-05	LT	5.68422	0.175926	0.000863345	GT	2.3404	0.427278	0.000978293	GT	0.411736	2.42874	0.00734054	LT	-368	-367	-365	-939	-935	-930	-364	-363	-361
102282_g_at	A	A	P	A	233.65	196.244	271.056	300.867	234.445	367.288	315.5	277.412	353.588	221.2	113.929	328.471	0.77659	1.28768	0.0953832	LT	0.740571	1.35031	0.0285171	LT	1.05628	0.946715	0.613063	GT	0.953619	1.04864	0.691571	LT	1.36016	0.735209	0.276718	GT	1.42631	0.701109	0.192763	GT	-27721	-27650	-27580	-9478	-9444	-9409	1053	1057	1061
102283_at	P	P	P	P	62.7	54.3872	71.0128	104.367	6.36877	202.365	63.4	55.5471	71.2529	91.2667	49.3274	133.206	0.600767	1.66454	0.799463	LT	0.988959	1.01116	0.868997	LT	0.686998	1.45561	0.0955806	LT	1.64616	0.607474	0.887867	GT	1.14354	0.874481	0.794465	GT	0.694668	1.43954	0.236442	LT	-269	-268	-266	-852	-846	-840	-285	-283	-281
102286_at	P	P	A	P	673.2	502.453	843.947	679.9	323.561	1036.24	461.833	328.528	595.139	603.733	427.342	780.125	0.990146	1.00995	0.937253	LT	1.45767	0.686027	0.156422	GT	1.11506	0.896811	0.708001	GT	1.47218	0.679267	0.358129	GT	1.12616	0.887974	0.849279	GT	0.764962	1.30725	0.280746	LT	-376	-375	-374	-449	-447	-445	-1983	-1974	-1964
102292_at	P	P	P	P	1557.43	1207.69	1907.18	10063.2	7049.17	13077.3	10089.5	6551.72	13627.3	5043.07	4623.49	5462.65	0.154765	6.46142	2.4283e-05	LT	0.154362	6.47829	3.74331e-05	LT	0.308827	3.23806	0.000166269	LT	0.997397	1.00261	0.975706	LT	1.99546	0.501138	0.0130417	GT	2.00067	0.499833	0.025082	GT	131	132	133	1158	1166	1175	-1654	-1642	-1631
102298_at	P	P	P	P	548.6	394.45	702.75	5654.6	3064.24	8244.96	1586.6	566.088	2607.11	1087.43	540.968	1633.9	0.0970184	10.3073	9.11173e-05	LT	0.345771	2.89209	0.0177813	LT	0.504491	1.9822	0.0565255	LT	3.56397	0.280586	0.0429896	GT	5.19995	0.19231	0.0140497	GT	1.45903	0.685386	0.504255	GT	178	179	180	-2412	-2393	-2375	314	317	319
102299_at	P	P	P	P	1475.33	1128.62	1822.05	1667.03	1362.42	1971.64	2037.57	1679.28	2395.86	1452.1	1330.27	1573.93	0.885005	1.12994	0.455291	LT	0.724066	1.38109	0.101105	LT	1.016	0.984252	0.919518	GT	0.818149	1.22227	0.197488	LT	1.14802	0.871068	0.2901	GT	1.40319	0.712664	0.0258045	GT	392	393	393	1236	1240	1244	-1317	-1313	-1308
102300_at	P	A	P	A	574.867	385.145	764.588	593.133	381.705	804.562	454	378.801	529.199	444.3	408.725	479.875	0.969203	1.03178	0.809273	LT	1.26623	0.789748	0.454086	GT	1.29387	0.772875	0.406655	GT	1.30646	0.765427	0.269006	GT	1.33498	0.749073	0.212097	GT	1.02183	0.978634	0.872164	GT	-469	-467	-466	1268	1274	1281	-973	-967	-962
102302_at	P	P	P	P	1541.28	1250.38	1832.18	1168.1	722.287	1613.91	1361	1014.7	1707.3	878.7	663.795	1093.61	1.31948	0.757875	0.167586	GT	1.13246	0.88303	0.469659	GT	1.75405	0.570109	0.00865492	GT	0.858266	1.16514	0.516141	LT	1.32935	0.752247	0.366178	GT	1.54888	0.645628	0.0686128	GT	-1174	-1171	-1167	-855	-851	-848	-1671	-1664	-1657
102306_at	P	P	P	P	601.583	464.702	738.465	362.267	283.827	440.707	725.833	643.532	808.135	576.733	510.814	642.653	1.66061	0.602189	0.0250308	GT	0.828817	1.20654	0.224116	LT	1.04309	0.958692	0.926276	GT	0.499104	2.00359	0.00480199	LT	0.628135	1.59201	0.0189406	LT	1.25853	0.794581	0.047578	GT	-1075	-1072	-1070	-5975	-5954	-5932	1025	1028	1032
102308_at	P	P	P	P	3680.98	3051.34	4310.62	3173.4	2355.48	3991.32	3690.27	3250.94	4129.59	3085.37	2720.8	3449.93	1.15995	0.862107	0.383737	GT	0.997484	1.00252	0.895117	LT	1.19305	0.838191	0.285169	GT	0.859938	1.16287	0.302357	LT	1.02853	0.972259	0.915452	GT	1.19605	0.836082	0.10562	GT	-3294	-3287	-3280	-552	-550	-549	5798	5816	5834
102309_at	P	P	P	P	1019.48	677.489	1361.48	675.9	286.398	1065.4	911.333	680.616	1142.05	1238.93	1190.05	1287.81	1.50833	0.662983	0.368678	GT	1.11867	0.893917	0.97295	GT	0.822872	1.21526	0.414344	LT	0.741661	1.34833	0.358779	LT	0.54555	1.83301	0.120083	LT	0.735579	1.35947	0.0605984	LT	463	466	468	765	771	777	-1655	-1643	-1630
102312_r_at	P	A	A	P	335.217	307.647	362.787	376.567	295.867	457.266	285.433	252.854	318.012	358.5	316.001	400.999	0.890192	1.12335	0.303923	LT	1.17441	0.851489	0.0619531	GT	0.935053	1.06946	0.379754	LT	1.31928	0.757989	0.107981	GT	1.0504	0.952023	0.774614	GT	0.796188	1.25599	0.053212	LT	-1723	-1720	-1716	1589	1594	1598	-548	-546	-545
102313_at	P	P	P	P	883.067	719.232	1046.9	4005.73	3699.06	4312.4	2260.63	1940.63	2580.64	2123.23	1833.65	2412.82	0.220451	4.53616	8.53e-06	LT	0.390628	2.55998	0.000231638	LT	0.415907	2.40439	0.000356795	LT	1.77195	0.564349	0.0020331	GT	1.88662	0.530049	0.00146215	GT	1.06471	0.939221	0.564885	GT	-743	-741	-739	6494	6516	6538	-38218	-38090	-37962
102315_at	P	P	P	P	3457.78	3091.78	3823.79	5002.1	4459.81	5544.39	4033.47	2901.55	5165.38	4865.9	4232.69	5499.11	0.691266	1.44662	0.00402413	LT	0.857273	1.16649	0.317315	LT	0.710615	1.40723	0.00736843	LT	1.24015	0.806355	0.224679	GT	1.02799	0.972771	0.758701	GT	0.828925	1.20638	0.288189	LT	493	494	495	-719	-717	-715	670	672	674
102316_at	P	P	P	P	817.25	654.244	980.256	326.267	193.049	459.485	514.167	484.013	544.32	671.1	516.104	826.096	2.50485	0.399225	0.00322798	GT	1.58947	0.629142	0.0227122	GT	1.21778	0.821169	0.311483	GT	0.634554	1.57591	0.101893	LT	0.486167	2.05691	0.0479228	LT	0.766155	1.30522	0.125258	LT	-544	-542	-540	-923	-919	-914	-806	-803	-799
102317_at	P	P	P	P	2159.05	1520.45	2797.65	1140.73	593.829	1687.64	1886.27	1703.76	2068.78	1784.1	1639.97	1928.23	1.89269	0.52835	0.101161	GT	1.14462	0.873656	0.833699	GT	1.21016	0.826336	0.690438	GT	0.604757	1.65356	0.126189	LT	0.639389	1.56399	0.154776	LT	1.05727	0.945837	0.44002	GT	822	826	829	236	237	239	1524	1533	1542
102319_at	P	P	P	P	1460.32	905.442	2015.19	1269.33	707.415	1831.25	1334.33	1077.39	1591.28	1079.37	904.914	1253.82	1.15046	0.869218	0.889523	GT	1.09442	0.913729	0.928619	GT	1.35294	0.739132	0.669617	GT	0.951287	1.05121	0.735097	LT	1.176	0.850341	0.685088	GT	1.23622	0.808918	0.19619	GT	-471	-469	-467	-537	-533	-530	1459	1468	1477
102320_at	P	P	P	P	1455.05	1342.92	1567.18	1090.5	641.969	1539.03	1583.9	1185.51	1982.29	1267.23	1130.45	1404.02	1.3343	0.749459	0.0686339	GT	0.91865	1.08855	0.498102	LT	1.14821	0.870921	0.0817354	GT	0.68849	1.45245	0.185715	LT	0.860536	1.16207	0.437884	LT	1.24989	0.800072	0.204965	GT	-1262	-1259	-1256	-1286	-1281	-1277	1572	1578	1583
102321_at	P	A	P	P	815.55	557.055	1074.05	513.233	360.23	666.237	707.267	587.033	827.5	737.967	535.527	940.407	1.58904	0.629309	0.283504	GT	1.1531	0.867227	0.874368	GT	1.10513	0.90487	0.945106	GT	0.725657	1.37806	0.130464	LT	0.69547	1.43788	0.159038	LT	0.958399	1.04341	0.87036	LT	-524	-522	-520	771	775	780	1442	1450	1457
102322_at	P	P	P	P	18112.9	14736.1	21489.7	10521.8	8584.07	12459.5	17581.7	13721	21442.4	17195.7	14132.8	20258.5	1.72147	0.580899	0.00708751	GT	1.03022	0.97067	0.885977	GT	1.05334	0.949359	0.781735	GT	0.598451	1.67098	0.0236191	LT	0.611885	1.63429	0.0219121	LT	1.02245	0.978045	0.90003	GT	10177	10197	10217	27563	27640	27717	-1822	-1817	-1812
102323_at	P	P	P	P	1022.48	853.303	1191.66	1393.03	1116.85	1669.22	1377.83	1160.91	1594.76	1810.53	1507.3	2113.77	0.733998	1.3624	0.0575492	LT	0.742095	1.34754	0.05191	LT	0.564742	1.77072	0.00321849	LT	1.01103	0.989089	0.961997	GT	0.769405	1.29971	0.11879	LT	0.76101	1.31404	0.079354	LT	1695	1700	1706	-475	-472	-470	-8330	-8291	-8251
102324_at	P	P	P	P	641.3	532.07	750.53	508.6	471.284	545.916	501.267	453.145	549.388	516.367	409.902	622.831	1.26091	0.793077	0.137773	GT	1.27936	0.781641	0.119558	GT	1.24195	0.805187	0.191878	GT	1.01463	0.985581	0.815075	GT	0.984959	1.01527	0.971002	LT	0.970757	1.03012	0.877305	LT	-410	-409	-408	-1394	-1390	-1386	-625	-623	-621
102328_at	P	P	P	P	245.183	204.71	285.657	185.2	139.802	230.598	195.833	140.158	251.509	279.2	234.65	323.75	1.32388	0.755353	0.136022	GT	1.252	0.798722	0.227665	GT	0.878164	1.13874	0.374119	LT	0.945702	1.05742	0.797555	LT	0.663324	1.50756	0.0471082	LT	0.701409	1.4257	0.0869221	LT	-926	-923	-921	-65804	-65528	-65252	-5302	-5280	-5258
102331_at	P	P	P	P	677.85	457.924	897.776	601.967	268.096	935.837	883.733	684.786	1082.68	679	405.52	952.48	1.12606	0.888053	0.70696	GT	0.76703	1.30373	0.287412	LT	0.998306	1.0017	0.892128	LT	0.681163	1.46808	0.256378	LT	0.886549	1.12797	0.663884	LT	1.30152	0.768331	0.276901	GT	-7777	-7742	-7707	-923	-917	-911	494	497	500
102332_at	P	A	P	P	381.783	254.593	508.974	157.833	144.198	171.469	300.7	253.817	347.583	280.233	260.055	300.411	2.4189	0.413411	0.0159739	GT	1.26965	0.78762	0.533643	GT	1.36238	0.734011	0.387821	GT	0.524886	1.90517	0.00221933	LT	0.563221	1.7755	0.000521675	LT	1.07303	0.931937	0.501639	GT	-2062	-2054	-2047	894	899	904	863	868	872
102333_at	P	P	P	P	2055.22	1941.59	2168.84	2070.13	1468.03	2672.24	2020.17	1739.66	2300.67	1797.57	1639.66	1955.48	0.992794	1.00726	0.914189	LT	1.01735	0.982946	0.755597	GT	1.14333	0.874636	0.0346018	GT	1.02473	0.975863	0.957559	GT	1.15163	0.868334	0.453036	GT	1.12383	0.889811	0.247868	GT	515	516	517	5365	5381	5397	762	764	767
102336_at	P	P	P	P	2461.93	1972.07	2951.8	1882.23	1142.26	2622.21	2071.8	1943.45	2200.15	2229.8	1852.47	2607.13	1.30799	0.764535	0.20823	GT	1.18831	0.841534	0.350236	GT	1.10411	0.905711	0.621218	GT	0.908501	1.10071	0.57103	LT	0.844127	1.18466	0.441466	LT	0.929142	1.07626	0.510503	LT	588	589	591	2150	2157	2164	488	489	491
102340_at	P	P	P	P	368.45	278.499	458.401	338.9	214.857	462.943	381.267	272.122	490.411	474.167	469.677	478.657	1.08719	0.919799	0.699396	GT	0.966384	1.03479	0.823043	LT	0.777047	1.28692	0.138326	LT	0.888879	1.12501	0.635018	LT	0.714728	1.39913	0.150704	LT	0.804077	1.24366	0.200153	LT	659	661	663	-1247	-1241	-1235	-586	-584	-581
102341_at	P	P	P	P	165.433	92.7419	238.125	235.233	159.467	311	436.833	274.688	598.979	244.833	119.847	369.82	0.703273	1.42192	0.272506	LT	0.37871	2.64054	0.03226	LT	0.675698	1.47995	0.293425	LT	0.538497	1.85702	0.0676607	LT	0.96079	1.04081	0.998575	LT	1.78421	0.560473	0.124596	GT	162	163	165	321	325	329	528	534	540
102342_at	P	A	A	A	762.1	614.696	909.504	660.667	330.801	990.532	597.933	447.77	748.096	894.867	714.672	1075.06	1.15353	0.866903	0.494193	GT	1.27456	0.784586	0.289224	GT	0.851635	1.17421	0.37604	LT	1.10492	0.905045	0.92404	GT	0.738285	1.35449	0.309875	LT	0.668181	1.4966	0.0709389	LT	3694	3709	3724	123	123	124	-333	-331	-329
102343_at	P	P	P	P	968.617	731.04	1206.19	897.4	753.323	1041.48	802.733	656.68	948.787	642	552.765	731.235	1.07936	0.926476	0.830336	GT	1.20665	0.828742	0.450331	GT	1.50875	0.662801	0.0911466	GT	1.11793	0.89451	0.405386	GT	1.39782	0.7154	0.038139	GT	1.25036	0.799767	0.133401	GT	-5731	-5716	-5701	365	366	368	1072	1076	1080
102346_at	P	P	P	P	918.233	655.406	1181.06	875.033	522.985	1227.08	860	758.647	961.353	1287.93	929.386	1646.48	1.04937	0.952953	0.93066	GT	1.06771	0.936581	0.986247	GT	0.712951	1.40262	0.186849	LT	1.01748	0.98282	0.926341	GT	0.679409	1.47187	0.168705	LT	0.667736	1.4976	0.0571776	LT	-251	-250	-250	-416	-414	-413	-615	-612	-610
102348_at	P	P	P	P	829.917	547.781	1112.05	1453.77	273.328	2634.21	1361.3	915.249	1807.35	1488.57	1147.11	1830.03	0.570873	1.7517	0.520094	LT	0.60965	1.64029	0.170275	LT	0.557527	1.79363	0.109586	LT	1.06793	0.936395	0.761573	GT	0.976622	1.02394	0.649668	LT	0.914504	1.09349	0.640153	LT	-272	-270	-269	-147	-146	-145	-133	-132	-131
102349_at	P	A	A	A	879.767	373.819	1385.71	1376.57	-126.555	2879.69	729.867	639.996	819.738	496.133	104.374	887.892	0.639102	1.5647	0.53138	LT	1.20538	0.829614	0.80333	GT	1.77325	0.563937	0.559318	GT	1.88605	0.530208	0.570542	GT	2.77459	0.360414	0.28647	GT	1.47111	0.679759	0.34017	GT	-1352	-1340	-1329	-226	-224	-221	-701	-693	-684
102350_at	P	A	P	A	1006.83	504.615	1509.05	1330.4	751.328	1909.47	1306.97	1042.12	1571.81	903.767	477.932	1329.6	0.75679	1.32137	0.397102	LT	0.770359	1.2981	0.367979	LT	1.11404	0.897633	0.915947	GT	1.01793	0.982386	0.944586	GT	1.47206	0.67932	0.28276	GT	1.44613	0.691499	0.193708	GT	-1038	-1032	-1027	-855	-849	-842	511	515	519
102352_at	P	A	P	P	290.5	227.033	353.967	336.733	280.704	392.762	409.867	148.653	671.08	268.2	212.866	323.534	0.8627	1.15915	0.380678	LT	0.708767	1.4109	0.52245	LT	1.08315	0.923236	0.779887	GT	0.821568	1.21718	0.916557	LT	1.25553	0.796476	0.164714	GT	1.52821	0.654359	0.560351	GT	1984	1992	2001	464	467	469	918	924	929
102353_at	A	A	P	A	112.083	65.6543	158.512	138.2	91.6506	184.749	114.533	50.8408	178.226	50.8667	6.93167	94.8017	0.811023	1.23301	0.380002	LT	0.978609	1.02186	0.89928	LT	2.20347	0.453829	0.0917006	GT	1.20664	0.828751	0.492867	GT	2.71691	0.368066	0.143551	GT	2.25164	0.444121	0.222197	GT	-337	-335	-332	8990	9074	9158	-201	-199	-197
102354_at	P	P	P	P	2574.65	2076.94	3072.36	1292.5	1090.52	1494.48	1017.7	786.809	1248.59	1751.47	1267.41	2235.53	1.99199	0.50201	0.00756629	GT	2.52987	0.395277	0.00179442	GT	1.47	0.680274	0.0997839	GT	1.27002	0.787389	0.142731	GT	0.737953	1.3551	0.166766	LT	0.581056	1.721	0.0470115	LT	-37431	-37312	-37193	661	664	667	-4979	-4957	-4935
102356_at	P	A	A	A	317.2	249.519	384.881	179.1	93.6381	264.562	296.4	261.721	331.079	249.6	195.09	304.11	1.77108	0.564628	0.0345833	GT	1.07018	0.934426	0.783148	GT	1.27083	0.786885	0.221808	GT	0.604251	1.65494	0.114131	LT	0.717548	1.39363	0.266839	LT	1.1875	0.842105	0.242985	GT	-1911	-1901	-1891	-329	-327	-324	376	378	381
102360_at	P	P	P	A	203.933	156.884	250.983	392.767	99.2061	686.327	375.233	174.423	576.044	297	272.083	321.917	0.519223	1.92596	0.198228	LT	0.543484	1.83998	0.0865487	LT	0.686644	1.45636	0.0735512	LT	1.04673	0.955359	0.929849	GT	1.32245	0.756174	0.84708	GT	1.26341	0.791508	0.663946	GT	100	101	101	214	216	218	1270	1280	1290
102362_i_at	P	P	A	P	645.867	393.249	898.485	2261.7	-157.251	4680.65	539.633	485.115	594.151	768.967	649.325	888.608	0.285567	3.50181	0.118298	LT	1.19686	0.835518	0.933114	GT	0.839915	1.1906	0.496887	LT	4.19118	0.238596	0.11085	GT	2.94122	0.339995	0.234327	GT	0.701764	1.42498	0.0194622	LT	78	78	79	351	356	361	56	57	58
102363_r_at	P	P	A	A	893.25	723.399	1063.1	2926.5	-345.332	6198.33	694	604.311	783.689	1124.73	840.585	1408.88	0.305228	3.27624	0.0521251	LT	1.2871	0.776938	0.197305	GT	0.794188	1.25915	0.226371	LT	4.21686	0.237143	0.105652	GT	2.60195	0.384327	0.299752	GT	0.617035	1.62065	0.0373592	LT	200	201	202	195	196	198	394	397	400
102364_at	P	P	P	P	21284.5	19388.8	23180.1	23871.5	18244.4	29498.7	25887.2	19846.8	31927.5	17992.4	16999.2	18985.5	0.891625	1.12155	0.363727	LT	0.822201	1.21625	0.119765	LT	1.18297	0.845329	0.0456921	GT	0.922138	1.08444	0.673616	LT	1.32676	0.753716	0.113806	GT	1.43879	0.69503	0.0533481	GT	463	465	466	-1056	-1052	-1049	1078	1081	1085
102368_at	P	P	P	P	618.733	475.311	762.156	874.5	442.546	1306.45	749.067	702.008	796.126	855.9	650.242	1061.56	0.707528	1.41337	0.218005	LT	0.826006	1.21065	0.262533	LT	0.722904	1.38331	0.136047	LT	1.16745	0.856566	0.699414	GT	1.02173	0.978731	0.945085	GT	0.87518	1.14262	0.43576	LT	352	353	355	-9776	-9736	-9695	-1140	-1135	-1130
102370_at	P	P	P	P	3256.45	2970.23	3542.67	940.4	603.735	1277.07	1638.2	1456.34	1820.06	1685.13	1553.66	1816.61	3.46283	0.288781	4.25679e-05	GT	1.98782	0.503063	4.45347e-05	GT	1.93246	0.517476	3.69288e-05	GT	0.574045	1.74202	0.042154	LT	0.558057	1.79193	0.0337881	LT	0.972149	1.02865	0.691289	LT	1701	1705	1710	2200	2208	2216	1867	1874	1880
102372_at	P	P	A	P	112.967	87.6915	138.242	128.2	123.39	133.01	102.567	72.5751	132.558	159.767	64.5762	254.957	0.881175	1.13485	0.355317	LT	1.1014	0.907937	0.645447	GT	0.707073	1.41428	0.454247	LT	1.24992	0.800052	0.187607	GT	0.80242	1.24623	0.840847	LT	0.641978	1.55769	0.481977	LT	1534	1541	1548	403	405	408	-181	-180	-179
102373_at	P	P	P	P	884.983	662.02	1107.95	665.1	324.75	1005.45	795.667	622.42	968.913	550.4	269.239	831.561	1.3306	0.75154	0.302973	GT	1.11225	0.899075	0.760054	GT	1.60789	0.621933	0.125928	GT	0.835903	1.19631	0.476164	LT	1.20839	0.827545	0.675909	GT	1.44562	0.691747	0.257621	GT	275	277	278	-4369	-4340	-4311	512	516	519
102374_at	P	A	A	A	696.933	598.58	795.287	287.6	2.74637	572.454	474.733	319.579	629.887	459.233	371.767	546.7	2.42327	0.412665	0.0368047	GT	1.46805	0.681175	0.0338911	GT	1.5176	0.658934	0.0133609	GT	0.605814	1.65067	0.30574	LT	0.626261	1.59678	0.307495	LT	1.03375	0.96735	0.936513	GT	-15433	-15347	-15262	-227	-225	-223	668	673	678
102375_at	P	P	P	P	1107.63	967.88	1247.39	1509.9	1067.82	1951.98	1088.9	858.945	1318.85	1126.13	1027.89	1224.38	0.733581	1.36318	0.0615404	LT	1.0172	0.983087	0.874275	GT	0.983572	1.0167	0.806655	LT	1.38663	0.721174	0.16399	GT	1.34078	0.745833	0.154193	GT	0.966937	1.03419	0.735289	LT	-1033	-1031	-1029	-377	-376	-375	2236	2244	2251
102378_at	P	P	P	P	586.95	430.222	743.678	235.067	156.291	313.843	852.067	626.738	1077.39	487.267	441.862	532.671	2.49695	0.400488	0.00566766	GT	0.688855	1.45169	0.111388	LT	1.20458	0.830167	0.507434	GT	0.275878	3.62479	0.00387289	LT	0.482419	2.07289	0.0118941	LT	1.74867	0.571864	0.0205283	GT	-733	-730	-727	-1044	-1038	-1032	1244	1251	1258
102379_at	P	P	P	P	414.3	361.546	467.054	1679.47	1337.02	2021.92	1030.33	648.122	1412.54	722.633	475.411	969.855	0.246685	4.05375	7.07e-06	LT	0.402103	2.48693	0.00134304	LT	0.57332	1.74423	0.0127111	LT	1.63002	0.613488	0.095913	GT	2.32409	0.430275	0.0172455	GT	1.4258	0.701359	0.298339	GT	494	495	497	-1171	-1165	-1160	360	361	363
102381_at	P	P	P	P	2919.75	1292.28	4547.22	1465.13	484.183	2446.08	1947.27	1269.35	2625.18	2467	2164.6	2769.4	1.99282	0.501801	0.413963	GT	1.49941	0.666929	0.819902	GT	1.18352	0.844935	0.84277	GT	0.752405	1.32907	0.440131	LT	0.593893	1.68381	0.220017	LT	0.789326	1.2669	0.238474	LT	698	703	709	200	203	205	-679	-671	-663
102382_at	P	P	P	P	611.45	511.863	711.037	1019.3	780.954	1257.65	1065.77	877.992	1253.54	862.7	679.196	1046.2	0.599872	1.66702	0.0118385	LT	0.573718	1.74302	0.0054385	LT	0.708763	1.41091	0.0487034	LT	0.956401	1.04559	0.746742	LT	1.18152	0.846365	0.359767	GT	1.23539	0.809464	0.187712	GT	244	245	245	-2951	-2941	-2931	1318	1323	1327
102384_at	P	P	P	P	338.967	196.571	481.362	93.9333	13.6059	174.261	164.867	102.739	226.994	274.233	209.872	338.595	3.60859	0.277117	0.0297063	GT	2.056	0.48638	0.173407	GT	1.23605	0.809027	0.844194	GT	0.569753	1.75515	0.22518	LT	0.342531	2.91945	0.0633673	LT	0.601191	1.66336	0.0747324	LT	-1057	-1052	-1046	-568	-563	-559	-394	-391	-388
102385_at	P	P	P	P	1585.97	1105.26	2066.67	3276.27	2850.92	3701.61	3071.53	2422.75	3720.31	3476.73	3018.67	3934.8	0.484077	2.06579	0.0108714	LT	0.516344	1.93669	0.0195332	LT	0.456166	2.19219	0.00768308	LT	1.06666	0.93751	0.615366	GT	0.942341	1.06119	0.576706	LT	0.883454	1.13192	0.380289	LT	603	605	607	541	543	546	273142	274444	275746
102387_at	P	P	P	P	2882.37	2615.91	3148.82	4512.67	4114.92	4910.42	3374.47	2700.9	4048.03	4585.33	4288.71	4881.96	0.638728	1.56561	0.000672645	LT	0.85417	1.17073	0.166433	LT	0.628606	1.59082	0.000434387	LT	1.3373	0.747777	0.057101	GT	0.984152	1.0161	0.776988	LT	0.735926	1.35883	0.0434989	LT	-1213	-1211	-1209	4132	4142	4152	-1402	-1399	-1396
102389_s_at	A	A	A	P	91.9833	79.1121	104.855	111.4	70.0163	152.784	87.9	65.5647	110.235	117.633	78.9786	156.288	0.825703	1.21109	0.385392	LT	1.04645	0.955608	0.718988	GT	0.78195	1.27885	0.173769	LT	1.26735	0.789048	0.451622	GT	0.94701	1.05595	0.81559	LT	0.747237	1.33826	0.268494	LT	-1113	-1109	-1104	225	227	228	-1128	-1121	-1115
102395_at	P	P	P	P	1980.03	1821.06	2139.01	459.6	250.846	668.354	1140.07	563.7	1716.43	1108.3	931.433	1285.17	4.30817	0.232117	9.3885e-05	GT	1.73677	0.575782	0.00844705	GT	1.78655	0.559738	0.000199917	GT	0.403134	2.48056	0.066134	LT	0.414689	2.41144	0.0312665	LT	1.02866	0.972136	0.925654	GT	-1356	-1351	-1346	-293	-292	-290	-3119	-3103	-3087
102398_at	P	P	P	P	2959.7	2150.04	3769.36	3230.53	1311.39	5149.67	2560.03	2090.28	3029.78	2736.5	1947.67	3525.33	0.916165	1.09151	0.861329	LT	1.15612	0.864964	0.585465	GT	1.08156	0.924587	0.792092	GT	1.26191	0.792449	0.619153	GT	1.18053	0.847074	0.757136	GT	0.935514	1.06893	0.766215	LT	-3587	-3575	-3564	881	885	889	-324	-323	-321
102400_at	P	P	P	P	785.05	687.895	882.205	705.433	576.075	834.792	687.9	526.309	849.491	956.667	734.294	1179.04	1.11286	0.898584	0.361911	GT	1.14123	0.87625	0.286259	GT	0.82061	1.21861	0.154184	LT	1.02549	0.975145	0.846115	GT	0.737387	1.35614	0.121206	LT	0.719059	1.39071	0.121592	LT	-1498	-1495	-1492	-368	-367	-366	-529	-527	-526
102401_at	P	P	P	P	470.833	401.081	540.586	635.467	371.159	899.774	489.3	342.532	636.068	1556.9	1202.61	1911.19	0.740925	1.34966	0.227769	LT	0.962259	1.03922	0.859507	LT	0.302417	3.30669	4.25289e-05	LT	1.29873	0.769985	0.475257	GT	0.408162	2.45001	0.0254392	LT	0.314278	3.18189	0.00384439	LT	78	79	79	452	455	458	282	283	285
102402_at	P	P	P	P	4558.65	3881.07	5236.23	4089.43	2843.64	5335.22	4285.67	3252.92	5318.42	3601.73	2617.93	4585.54	1.11474	0.897071	0.445601	GT	1.0637	0.940118	0.655992	GT	1.26568	0.790088	0.132913	GT	0.954212	1.04799	0.796982	LT	1.13541	0.880741	0.572884	GT	1.18989	0.840414	0.400754	GT	-905	-902	-900	-906	-903	-899	-1724	-1718	-1712
102403_at	P	P	P	P	1720.02	1090.02	2350.01	1081.7	602.093	1561.31	1198.33	875.881	1520.79	1339.33	1210.05	1468.62	1.59011	0.628889	0.249917	GT	1.43534	0.696699	0.391949	GT	1.28423	0.778675	0.618848	GT	0.90267	1.10782	0.653224	LT	0.807641	1.23817	0.34375	LT	0.894724	1.11766	0.452961	LT	-3282	-3268	-3253	-388	-385	-383	1051	1058	1064
102407_at	A	P	P	A	82.1833	55.3577	109.009	156.1	77.6985	234.501	122.967	70.0916	175.842	84.3667	-16.2961	185.029	0.526479	1.89941	0.0961116	LT	0.668338	1.49625	0.209244	LT	0.974121	1.02657	0.535743	LT	1.26945	0.787743	0.631586	GT	1.85026	0.540466	0.268945	GT	1.45753	0.686094	0.35869	GT	-423	-420	-417	-1696	-1680	-1665	475	479	484
102409_at	P	P	P	P	3635.77	3056	4215.53	2445.7	2167.78	2723.62	3047.33	2262.81	3831.86	3205.3	2751.34	3659.26	1.4866	0.672678	0.014607	GT	1.1931	0.838154	0.24745	GT	1.1343	0.881602	0.375159	GT	0.802571	1.246	0.216826	LT	0.763018	1.31059	0.0416284	LT	0.950717	1.05184	0.6923	LT	598	599	601	1370	1374	1379	-1918	-1912	-1905
102412_at	P	P	P	P	2100.38	1748.02	2452.75	2358.77	1989.96	2727.57	2097.6	1605.07	2590.13	2795.5	2410.71	3180.29	0.890458	1.12302	0.379987	LT	1.00133	0.998675	0.990325	GT	0.751344	1.33095	0.0639613	LT	1.12451	0.889278	0.442018	GT	0.843773	1.18515	0.181896	LT	0.750349	1.33271	0.111856	LT	-1709	-1704	-1700	853	856	860	-1609	-1603	-1597
102414_i_at	P	P	P	P	740.717	557.358	924.076	578	316.297	839.703	605.9	272.412	939.388	629.467	489.362	769.572	1.28152	0.780325	0.297726	GT	1.22251	0.817992	0.377912	GT	1.17674	0.849808	0.506917	GT	0.953953	1.04827	0.945123	LT	0.918238	1.08904	0.641906	LT	0.962561	1.0389	0.748134	LT	-6128	-6103	-6078	391	393	395	637	641	645
102415_r_at	P	P	P	P	210.617	151.946	269.287	156.867	118.791	194.942	169.967	110.83	229.104	183.667	106.213	261.12	1.34265	0.744797	0.295877	GT	1.23916	0.806995	0.449154	GT	1.14673	0.872042	0.618535	GT	0.922926	1.08351	0.7691	LT	0.854083	1.17085	0.665578	LT	0.925408	1.0806	0.853143	LT	-1273	-1267	-1261	5253	5288	5324	1115	1122	1130
102419_at	P	A	P	A	744.567	559.312	929.821	613.167	395.095	831.239	1314.47	919.74	1709.19	462.9	294.202	631.598	1.2143	0.823522	0.468177	GT	0.56644	1.76541	0.0393541	LT	1.60848	0.621704	0.0985687	GT	0.466476	2.14373	0.032879	LT	1.32462	0.754933	0.343418	GT	2.83963	0.352158	0.0173037	GT	-402	-400	-398	-464	-461	-458	-11188	-11114	-11040
102421_at	P	P	P	P	866.65	599.967	1133.33	896.533	813.947	979.12	952.067	672.634	1231.5	865.933	831.233	900.634	0.966668	1.03448	0.704999	LT	0.910283	1.09856	0.636128	LT	1.00083	0.999173	0.781254	GT	0.941671	1.06194	0.827872	LT	1.03534	0.965869	0.564454	GT	1.09947	0.90953	0.678003	GT	-258	-257	-257	-1086	-1081	-1075	-644	-641	-637
102423_at	P	P	P	P	143.417	99.8546	186.979	124.733	86.6178	162.849	112.133	99.1549	125.112	207.733	179.281	236.186	1.14979	0.869727	0.814982	GT	1.27898	0.781871	0.608676	GT	0.690388	1.44846	0.181518	LT	1.11237	0.898985	0.639195	GT	0.600449	1.66542	0.0380046	LT	0.539795	1.85256	0.0028217	LT	-2240	-2233	-2225	856	860	864	-516	-513	-511
102425_at	P	P	P	P	704.65	613.417	795.883	619.667	470.664	768.669	595.933	493.613	698.254	694.533	623.943	765.123	1.13714	0.879396	0.348814	GT	1.18243	0.845715	0.202895	GT	1.01457	0.985643	0.959237	GT	1.03983	0.9617	0.858785	GT	0.892206	1.12082	0.419638	LT	0.858034	1.16545	0.200745	LT	228	228	229	-4355	-4338	-4322	317	318	319
102427_at	P	P	P	P	2094.75	1124.81	3064.69	1106.9	474.159	1739.64	2245.97	1861.45	2630.48	2969	1866	4072	1.89245	0.528416	0.493497	GT	0.932672	1.07219	0.59145	LT	0.705541	1.41735	0.378444	LT	0.492839	2.02906	0.0964953	LT	0.372819	2.68227	0.0676034	LT	0.756472	1.32193	0.35603	LT	-8629	-8562	-8496	1544	1561	1578	-326	-323	-319
102430_at	P	P	P	P	1011.78	773.728	1249.84	3088.1	2574.69	3601.51	1075.1	973.223	1176.98	2154.97	1869.95	2439.99	0.327639	3.05214	0.000314267	LT	0.941106	1.06258	0.603729	LT	0.469512	2.12987	0.00254951	LT	2.87238	0.348143	0.000398856	GT	1.43302	0.697829	0.0301626	GT	0.498894	2.00443	0.00120941	LT	-723	-721	-719	-1669	-1663	-1657	-1721	-1715	-1709
102476_f_at	P	P	P	P	3148.7	2427.79	3869.61	2668.37	2141.46	3195.27	2603.27	2228.49	2978.05	2201.5	2038.25	2364.75	1.18001	0.84745	0.466324	GT	1.20952	0.826775	0.395147	GT	1.43025	0.699177	0.102951	GT	1.02501	0.975603	0.874139	GT	1.21207	0.825037	0.149991	GT	1.1825	0.845668	0.114343	GT	444	445	446	558	559	561	452	453	454
102478_f_at	P	P	P	P	364.117	335.02	393.213	500.3	331.825	668.775	405.8	369.776	441.824	468	328.014	607.986	0.727797	1.37401	0.0696991	LT	0.897281	1.11448	0.143222	LT	0.778027	1.2853	0.0864858	LT	1.23287	0.811113	0.400741	GT	1.06902	0.935439	0.822543	GT	0.867094	1.15328	0.486557	LT	1842	1846	1851	2163	2170	2178	-2475	-2466	-2458
102557_at	P	P	P	P	141.85	103.4	180.3	150.3	99.0829	201.517	144.5	118.424	170.576	161.667	144.804	178.529	0.943779	1.05957	0.747847	LT	0.981661	1.01868	0.798157	LT	0.877423	1.1397	0.3992	LT	1.04014	0.961411	0.922434	GT	0.929691	1.07563	0.603333	LT	0.893814	1.1188	0.345716	LT	-774	-771	-768	-511	-509	-506	-391	-389	-387
102558_at	P	P	P	P	370.467	214.323	526.61	229.733	178.789	280.677	312.667	212.09	413.243	334.167	276.877	391.456	1.61259	0.620119	0.449169	GT	1.18486	0.843981	0.926729	GT	1.10863	0.902015	0.907804	GT	0.734755	1.361	0.249355	LT	0.687481	1.45459	0.0611256	LT	0.935661	1.06876	0.674923	LT	-596	-594	-591	2041	2054	2067	-335	-333	-331
102561_at	P	P	P	P	512.2	451.441	572.959	535.933	482.058	589.809	423.833	294.258	553.409	383.467	170.587	596.346	0.955716	1.04634	0.628356	LT	1.20849	0.827476	0.195884	GT	1.33571	0.748666	0.16151	GT	1.26449	0.790832	0.183863	GT	1.3976	0.715512	0.272743	GT	1.10527	0.904758	0.654603	GT	-762	-760	-758	396	397	399	-1139	-1134	-1129
102574_at	P	A	P	P	524.633	347.282	701.985	255.267	167.795	342.739	374.367	244.275	504.458	387.833	365.649	410.017	2.05524	0.486562	0.140295	GT	1.40139	0.713578	0.529003	GT	1.35273	0.739246	0.626463	GT	0.681863	1.46657	0.221737	LT	0.658187	1.51933	0.070374	LT	0.965277	1.03597	0.738077	LT	-439	-437	-436	-520	-517	-514	-379	-377	-374
102584_at	P	A	A	A	420.967	360.395	481.538	402.467	350.1	454.833	366.833	320.382	413.285	392.367	223.154	561.579	1.04597	0.956054	0.753589	GT	1.14757	0.871407	0.285415	GT	1.07289	0.932061	0.570544	GT	1.09714	0.911463	0.370431	GT	1.02574	0.974905	0.775721	GT	0.934925	1.0696	0.962422	LT	3968	3981	3993	6265	6293	6320	-226	-225	-224
102599_at	P	P	P	P	39405.5	32028.6	46782.3	47183.9	30321.4	64046.4	36509.6	34270.9	38748.3	30712.8	28523.4	32902.2	0.835147	1.19739	0.360677	LT	1.07932	0.926511	0.69437	GT	1.28303	0.779404	0.13748	GT	1.29237	0.773773	0.262175	GT	1.53629	0.650917	0.0840229	GT	1.18874	0.841224	0.0226673	GT	689	691	692	1040	1043	1046	-3831	-3821	-3811
102621_at	P	A	A	A	149.45	116.481	182.419	172.933	30.4144	315.452	120.267	93.1765	147.357	160.2	123.565	196.835	0.864206	1.15713	0.955593	LT	1.24266	0.804728	0.331189	GT	0.932896	1.07193	0.658486	LT	1.43792	0.695451	0.625213	GT	1.07948	0.926369	0.871151	GT	0.750728	1.33204	0.162757	LT	1276	1282	1287	521	524	527	-452	-449	-446
102625_f_at	P	A	P	P	78.3	50.8656	105.734	57.1	21.2882	92.9118	60.2333	43.938	76.5287	90.3667	46.9751	133.758	1.37128	0.729246	0.453035	GT	1.29994	0.769264	0.643194	GT	0.86647	1.15411	0.64871	LT	0.94798	1.05487	0.710427	LT	0.63187	1.5826	0.338338	LT	0.666544	1.50028	0.321457	LT	83	83	84	-724	-718	-712	-1197	-1187	-1177
102626_r_at	P	P	P	P	253.5	145.995	361.005	197.6	159.613	235.587	174.1	143.297	204.903	240.967	182.671	299.263	1.28289	0.779487	0.847942	GT	1.45606	0.686785	0.644652	GT	1.05201	0.950559	0.819342	GT	1.13498	0.881073	0.410935	GT	0.82003	1.21947	0.30223	LT	0.722507	1.38407	0.10764	LT	61	61	62	159	161	163	429	434	439
102631_at	P	A	P	P	604.95	443.101	766.799	456.067	263.09	649.043	565.4	517.762	613.038	821.433	655.534	987.332	1.32645	0.753892	0.350472	GT	1.06995	0.934623	0.957097	GT	0.736457	1.35785	0.187405	LT	0.806627	1.23973	0.350046	LT	0.555208	1.80113	0.0808692	LT	0.688309	1.45284	0.0333247	LT	201	201	202	370	372	375	9678	9739	9800
102632_at	P	A	P	P	687.933	404.166	971.701	252.667	86.5938	418.739	488.767	440.504	537.029	771.367	451.436	1091.3	2.72269	0.367284	0.0909611	GT	1.40749	0.710486	0.698629	GT	0.891837	1.12128	0.634894	LT	0.516947	1.93443	0.071639	LT	0.327557	3.0529	0.0420489	LT	0.633637	1.57819	0.184495	LT	189	191	192	111	112	113	40734	41165	41595
102635_at	P	P	P	A	157.55	136.579	178.521	224.267	152.494	296.039	168.7	132.243	205.157	123.567	95.5576	151.576	0.702512	1.42346	0.05053	LT	0.933906	1.07077	0.616388	LT	1.27502	0.784301	0.0998117	GT	1.32938	0.752229	0.230012	GT	1.81494	0.550981	0.0389616	GT	1.36525	0.732464	0.132341	GT	-2221	-2214	-2208	298	299	300	-28350	-28237	-28123
102636_at	P	A	A	A	1009.93	681.504	1338.36	662.8	182.627	1142.97	1397.17	1162.13	1632.21	1051.67	624.025	1479.31	1.52374	0.656281	0.22387	GT	0.722844	1.38342	0.177317	LT	0.960317	1.04132	0.806293	LT	0.474389	2.10798	0.142529	LT	0.630238	1.5867	0.314192	LT	1.32853	0.752714	0.219484	GT	-2528	-2515	-2502	-155	-154	-153	1101	1108	1116
102637_at	P	A	P	A	256.933	215.714	298.153	255.067	91.6264	418.507	275.633	216.642	334.625	329.367	289.45	369.283	1.00732	0.992735	0.696809	GT	0.932156	1.07278	0.598356	LT	0.780083	1.28191	0.0759877	LT	0.925384	1.08063	0.641002	LT	0.774416	1.2913	0.347382	LT	0.836859	1.19494	0.205783	LT	-963	-959	-956	-910	-906	-901	-431	-429	-427
102642_at	P	P	P	P	732.6	642.609	822.591	649.733	528.725	770.741	509	371.818	646.182	761.4	676.03	846.77	1.12754	0.886887	0.31415	GT	1.43929	0.694786	0.0214672	GT	0.962175	1.03931	0.657891	LT	1.27649	0.783398	0.203586	GT	0.85334	1.17187	0.215806	LT	0.668505	1.49587	0.0463172	LT	2557	2562	2567	-2551	-2544	-2537	1517	1521	1525
102643_at	P	A	A	A	245.517	211.551	279.482	214	187.169	240.831	226.8	177.573	276.027	231.033	188.848	273.219	1.14727	0.871631	0.268519	GT	1.08252	0.923766	0.541275	GT	1.06269	0.941009	0.637958	GT	0.943563	1.05981	0.73006	LT	0.926273	1.0796	0.570231	LT	0.981677	1.01867	0.889536	LT	988	991	993	515	517	518	3295	3306	3317
102644_at	P	P	P	P	1489.22	1114.79	1863.64	1470.6	1354.6	1586.6	2329.3	1707.97	2950.63	2279.63	1916.24	2643.02	1.01266	0.987499	0.886668	GT	0.639341	1.56411	0.0625357	LT	0.65327	1.53076	0.056657	LT	0.631348	1.58391	0.0310824	LT	0.645104	1.55014	0.00828667	LT	1.02179	0.978677	0.948239	GT	782	784	786	1221	1226	1230	11705	11748	11791
102645_at	P	P	P	P	773.283	294.949	1251.62	1112.23	213.389	2011.08	973.933	352.402	1595.46	1084.1	447.409	1720.79	0.695253	1.43833	0.591627	LT	0.79398	1.25948	0.556535	LT	0.713295	1.40194	0.438224	LT	1.142	0.875656	0.995853	GT	1.02595	0.974706	0.861854	GT	0.89838	1.11312	0.832232	LT	681	688	695	192	194	197	-319	-314	-310
102646_at	P	P	P	P	513.367	316.762	709.971	461.133	157.22	765.047	422.6	169.848	675.352	585.233	327.044	843.423	1.11327	0.898253	0.819246	GT	1.21478	0.823193	0.702436	GT	0.8772	1.13999	0.622112	LT	1.09118	0.916438	0.903228	GT	0.787948	1.26912	0.531247	LT	0.722105	1.38484	0.44076	LT	311	314	317	314	318	323	-160	-158	-155
102647_g_at	P	P	P	P	2336.1	1267.44	3404.76	2024.17	1122.18	2926.15	1641.23	1037.4	2245.06	2218.03	1573.77	2862.3	1.1541	0.866473	0.825371	GT	1.42338	0.702553	0.465341	GT	1.05323	0.94946	0.887113	GT	1.23332	0.810819	0.612046	GT	0.912595	1.09578	0.684299	LT	0.73995	1.35144	0.283578	LT	493	495	498	412	415	418	-259	-257	-255
102649_s_at	P	P	P	P	2282.75	2177.2	2388.3	1134.9	514.722	1755.08	1659.7	1187.78	2131.62	1283.7	1056.19	1511.21	2.01141	0.497164	0.00295744	GT	1.3754	0.727062	0.0100371	GT	1.77826	0.562348	5.57764e-05	GT	0.683798	1.46242	0.214511	LT	0.884085	1.13111	0.533146	LT	1.2929	0.773453	0.208294	GT	-538	-536	-535	-2751	-2740	-2730	-814	-811	-808
102656_at	A	A	P	P	33.7667	25.0951	42.4383	68.9	38.149	99.651	53.8	40.8134	66.7866	65.9667	43.2203	88.713	0.490082	2.04047	0.0318898	LT	0.627633	1.59329	0.0775938	LT	0.511875	1.9536	0.0321925	LT	1.28067	0.780842	0.431853	GT	1.04447	0.957426	0.924563	GT	0.815563	1.22615	0.443571	LT	-193	-192	-191	347	349	352	254	256	258
102657_at	P	P	A	P	552.65	364.529	740.771	573.433	369.981	776.886	368.7	299.375	438.025	430.767	381.011	480.523	0.963756	1.03761	0.811966	LT	1.49892	0.667149	0.158607	GT	1.28295	0.779457	0.407727	GT	1.55528	0.642969	0.126193	GT	1.33119	0.751206	0.275377	GT	0.855916	1.16834	0.228462	LT	70	70	71	-678	-673	-668	209	210	212
102658_at	P	P	P	P	210.367	133.746	286.987	377.933	187.705	568.161	270.667	184.036	357.297	341.933	272.889	410.977	0.556624	1.79655	0.100086	LT	0.777217	1.28664	0.282833	LT	0.615227	1.62542	0.0585769	LT	1.39631	0.716176	0.46036	GT	1.10528	0.904745	0.92998	GT	0.791577	1.2633	0.271688	LT	-914	-910	-906	642	645	649	4204	4228	4252
102659_at	P	P	P	P	765.617	677.366	853.867	829.2	499.188	1159.21	933.933	631.55	1236.32	765.633	680.897	850.37	0.92332	1.08305	0.749542	LT	0.819777	1.21984	0.280396	LT	0.999978	1.00002	0.951561	LT	0.887858	1.12631	0.659956	LT	1.08302	0.92334	0.831282	GT	1.21982	0.819794	0.424983	GT	433	434	435	9646	9691	9735	-691	-688	-685
102660_at	P	A	P	P	164.55	128.274	200.826	146.1	97.3665	194.833	208.2	160.609	255.791	207.167	156.663	257.671	1.12628	0.887876	0.690161	GT	0.790346	1.26527	0.289336	LT	0.794288	1.25899	0.300646	LT	0.701729	1.42505	0.167152	LT	0.705229	1.41798	0.174885	LT	1.00499	0.995037	0.973148	GT	-4056	-4043	-4030	-1305	-1299	-1293	1979	1988	1997
102663_at	P	P	P	P	1252.45	917.224	1587.68	4001.37	2341.06	5661.67	2713.77	1974.77	3452.76	2395.63	2275.05	2516.21	0.313006	3.19483	0.00218629	LT	0.461517	2.16677	0.0110194	LT	0.522805	1.91276	0.0134488	LT	1.47447	0.67821	0.213067	GT	1.67028	0.598704	0.0773817	GT	1.1328	0.882771	0.535377	GT	3401	3412	3424	-514	-512	-509	10662	10712	10763
102670_at	P	P	P	P	1244.33	489.575	1999.09	749.8	419.29	1080.31	740.833	671.866	809.801	1290.53	900.903	1680.16	1.65955	0.602572	0.428276	GT	1.67964	0.595366	0.451932	GT	0.964201	1.03713	0.625611	LT	1.0121	0.988041	0.872282	GT	0.581	1.72117	0.117322	LT	0.574052	1.742	0.0280096	LT	195	196	197	1623	1635	1647	977	984	991
102672_g_at	A	P	P	A	240.383	176.05	304.717	420.267	261.106	579.428	258.867	196.593	321.14	306	256.698	355.302	0.571978	1.74832	0.0538432	LT	0.928599	1.07689	0.639757	LT	0.785566	1.27297	0.229371	LT	1.62349	0.615958	0.11912	GT	1.37342	0.728109	0.259873	GT	0.845969	1.18208	0.296058	LT	-458	-457	-455	-776	-773	-769	-217	-216	-215
102676_at	P	A	P	P	271.783	206.813	336.753	357	259.629	454.371	426.167	266.59	585.743	376.833	295.218	458.449	0.761298	1.31355	0.216998	LT	0.63774	1.56804	0.0958063	LT	0.72123	1.38652	0.125671	LT	0.8377	1.19374	0.565793	LT	0.947368	1.05556	0.747354	LT	1.13092	0.884239	0.70303	GT	-667	-664	-662	931	936	941	2832	2847	2862
102678_at	P	P	P	P	291.233	236.931	345.535	1417.03	1341.83	1492.24	782.7	647.961	917.439	1764.9	1477.87	2051.93	0.205523	4.86563	5.74e-06	LT	0.372088	2.68754	0.000203779	LT	0.165014	6.06009	3.99e-06	LT	1.81044	0.552351	0.00274039	GT	0.802897	1.24549	0.0706242	LT	0.443481	2.25489	0.0024872	LT	168	169	170	820	825	831	314	316	318
102682_at	P	A	A	A	293.05	213.726	372.374	236.433	177.724	295.143	207.6	190.698	224.502	289.633	191.846	387.421	1.23946	0.806802	0.502281	GT	1.41161	0.708412	0.254598	GT	1.0118	0.988341	0.968694	GT	1.13889	0.878049	0.465709	GT	0.816319	1.22501	0.470658	LT	0.716768	1.39515	0.198566	LT	-531	-529	-527	-331	-330	-328	-3547	-3529	-3510
102683_at	P	P	P	P	1610.47	1469.41	1751.52	1753.5	1592.46	1914.54	1785.17	1453.19	2117.14	1812.87	1492.99	2132.74	0.91843	1.08881	0.257909	LT	0.902138	1.10848	0.293423	LT	0.888354	1.12568	0.221671	LT	0.982261	1.01806	0.915596	LT	0.967253	1.03386	0.795886	LT	0.98472	1.01552	0.905119	LT	-805	-803	-802	1773	1778	1783	-58436	-58282	-58127
102686_at	P	A	A	A	686.35	426.277	946.423	399.733	236.794	562.673	737.767	485.571	989.962	691.433	477.692	905.174	1.71702	0.582405	0.339569	GT	0.930308	1.07491	0.678669	LT	0.992648	1.00741	0.772155	LT	0.541815	1.84565	0.090881	LT	0.578123	1.72974	0.0986968	LT	1.06701	0.937198	0.837808	GT	-1051	-1047	-1043	-1598	-1588	-1579	-1274	-1267	-1260
102689_at	P	P	P	P	2004.57	1108.83	2900.3	4885.4	2455.83	7314.97	2940.13	1622.77	4257.5	4797.37	4005.94	5588.79	0.410318	2.43714	0.178949	LT	0.681794	1.46672	0.41512	LT	0.417847	2.39322	0.162871	LT	1.66163	0.60182	0.227432	GT	1.01835	0.98198	0.898333	GT	0.612864	1.63168	0.12582	LT	-178	-177	-176	-277	-274	-271	-538	-533	-527
102691_at	P	P	P	P	1496.03	1117.08	1874.98	1052.4	684.957	1419.84	1728.8	1274.18	2183.42	1435.87	830.864	2040.87	1.42154	0.70346	0.179391	GT	0.865359	1.15559	0.45927	LT	1.0419	0.959783	0.864279	GT	0.608746	1.64272	0.102496	LT	0.732937	1.36437	0.343033	LT	1.20401	0.830557	0.447509	GT	945	948	952	8505	8551	8596	858	863	867
102695_at	P	P	P	P	202.717	132.885	272.548	249.533	168.531	330.535	215.767	177.374	254.159	185.267	154.825	215.708	0.812383	1.23095	0.405206	LT	0.939518	1.06438	0.639871	LT	1.09419	0.913919	0.969922	GT	1.1565	0.864681	0.549381	GT	1.34689	0.742453	0.217051	GT	1.16463	0.858644	0.304207	GT	-1234	-1230	-1226	244	245	246	203	204	205
102696_s_at	P	P	P	P	596.167	408.342	783.992	716.733	532.746	900.721	773.067	739.798	806.335	882.2	831.197	933.203	0.831783	1.20224	0.454233	LT	0.771171	1.29673	0.305243	LT	0.675773	1.47979	0.174164	LT	0.92713	1.0786	0.527969	LT	0.812439	1.23086	0.173591	LT	0.876294	1.14117	0.0237837	LT	-406	-405	-403	-620	-617	-614	1038	1042	1047
102697_at	P	P	P	P	1034.4	759.494	1309.31	1364.8	1036.88	1692.72	1055.57	912.738	1198.4	1233.33	984.461	1482.21	0.757913	1.31941	0.290953	LT	0.979948	1.02046	0.764848	LT	0.838703	1.19232	0.434052	LT	1.29295	0.773422	0.173456	GT	1.10659	0.903673	0.599364	GT	0.855865	1.16841	0.288268	LT	-1146	-1143	-1140	1054	1057	1061	-1132	-1128	-1124
102699_at	A	P	P	P	71.5167	54.9825	88.0509	882.967	504.77	1261.16	316.033	164.793	467.274	742.167	606.41	877.924	0.0809959	12.3463	9.06e-06	LT	0.226295	4.41902	0.000363741	LT	0.096362	10.3775	3.65e-06	LT	2.7939	0.357922	0.0290307	GT	1.18971	0.840538	0.581075	GT	0.425825	2.34838	0.0218635	LT	-234	-233	-232	-3071	-3051	-3031	258	259	261
102709_at	P	A	P	A	131.85	92.025	171.675	84.3667	48.9522	119.781	77.8333	53.6944	101.972	103.2	78.377	128.023	1.56282	0.639869	0.167089	GT	1.694	0.590317	0.107736	GT	1.27762	0.782708	0.467055	GT	1.08394	0.92256	0.818292	GT	0.817506	1.22323	0.401052	LT	0.754199	1.32591	0.245957	LT	-777	-773	-768	-185	-183	-182	-5445	-5401	-5358
102711_at	P	A	P	P	411.517	367.016	456.017	476.467	385.9	567.033	384.233	280.412	488.055	469.8	361.899	577.701	0.863684	1.15783	0.188028	LT	1.07101	0.933701	0.512835	GT	0.87594	1.14163	0.280311	LT	1.24005	0.806422	0.240275	GT	1.01419	0.986008	0.908637	GT	0.817866	1.22269	0.305355	LT	771	773	775	331	332	333	-554	-552	-550
102712_at	P	P	P	P	475.8	439.301	512.299	914.267	403.435	1425.1	420.867	298.134	543.6	806.4	698.677	914.123	0.520417	1.92154	0.0586606	LT	1.13052	0.884545	0.273161	GT	0.59003	1.69483	0.000174958	LT	2.17234	0.460333	0.154804	GT	1.13376	0.882018	0.961367	GT	0.521908	1.91605	0.0188776	LT	13225	13277	13329	-5362	-5332	-5303	-384	-382	-380
102714_at	A	P	P	A	262.067	228.784	295.349	1065.33	650.897	1479.77	1064.93	542.622	1587.24	289.633	250.22	329.047	0.245995	4.06512	5.3681e-05	LT	0.246087	4.0636	0.000293645	LT	0.904822	1.10519	0.350241	LT	1.00038	0.999625	0.927449	GT	3.67821	0.271871	0.00358973	GT	3.67683	0.271973	0.0118988	GT	529	532	535	3350	3376	3402	404	407	410
102715_at	P	A	P	P	926.4	516.674	1336.13	101.5	55.4459	147.554	400.367	59.3156	741.418	452.7	423.91	481.49	9.12709	0.109564	0.000697047	GT	2.31388	0.432175	0.0783576	GT	2.04639	0.488666	0.124622	GT	0.253518	3.9445	0.0588994	LT	0.22421	4.4601	0.00317114	LT	0.884397	1.13071	0.507819	LT	130	130	131	-270	-268	-266	216	217	219
102724_at	P	P	P	P	214.367	153.966	274.767	455.033	196.613	713.454	290.5	252.297	328.703	425.033	245.748	604.318	0.471101	2.12269	0.101141	LT	0.737923	1.35515	0.25018	LT	0.504353	1.98274	0.0633157	LT	1.56638	0.638415	0.405952	GT	1.07058	0.934071	0.995261	GT	0.683476	1.46311	0.180262	LT	552	556	559	242	244	246	-303	-301	-298
102727_at	P	P	P	P	1017.8	523.086	1512.51	2260.13	575.302	3944.96	1638.8	1347.2	1930.4	1414.8	1151.4	1678.2	0.450327	2.22061	0.147364	LT	0.621064	1.61014	0.194299	LT	0.719395	1.39006	0.300645	LT	1.37914	0.72509	0.659798	GT	1.59749	0.625981	0.443083	GT	1.15833	0.863315	0.34049	GT	68	69	69	404	408	412	778	785	792
102731_g_at	A	P	A	P	579.15	473.946	684.354	1434.83	1158.53	1711.14	771.167	632.566	909.767	1129.4	1029.36	1229.44	0.403636	2.47748	0.000459042	LT	0.751005	1.33155	0.0810912	LT	0.512794	1.9501	0.00150634	LT	1.8606	0.537461	0.0107985	GT	1.27044	0.78713	0.10424	GT	0.682811	1.46453	0.0198092	LT	2810	2819	2828	3296	3312	3327	752	756	759
102732_at	P	P	P	P	668.1	563.88	772.32	879.967	281.156	1478.78	1054.83	699.695	1409.97	544.367	391.314	697.42	0.759233	1.31712	0.470834	LT	0.63337	1.57886	0.0299098	LT	1.2273	0.814798	0.20959	GT	0.834223	1.19872	0.50825	LT	1.6165	0.618622	0.321427	GT	1.93773	0.516069	0.03939	GT	767	770	773	-920	-916	-911	-821	-817	-813
102734_at	P	A	P	P	451.967	368.257	535.676	284.767	136.859	432.674	487.333	406.934	567.732	530.533	508.444	552.623	1.58715	0.630061	0.0512954	GT	0.927428	1.07825	0.567265	LT	0.85191	1.17383	0.239027	LT	0.584337	1.71134	0.0845278	LT	0.536755	1.86305	0.0499946	LT	0.918573	1.08865	0.354201	LT	101	101	102	163	164	165	-734	-729	-724
102736_at	P	P	P	P	11399.9	7791.13	15008.7	12283.8	7131.11	17436.4	14021.2	11667.7	16374.8	17664.4	13964.4	21364.5	0.928049	1.07753	0.738652	LT	0.813048	1.22994	0.331301	LT	0.645361	1.54952	0.100335	LT	0.876083	1.14144	0.500763	LT	0.695395	1.43803	0.174084	LT	0.793755	1.25983	0.192946	LT	298	299	300	414	417	419	-1267	-1259	-1252
102741_at	P	P	P	P	135.4	71.3664	199.434	390.8	358.512	423.088	289.467	183.339	395.595	618.8	532.46	705.14	0.346469	2.88626	0.0185774	LT	0.467757	2.13786	0.0713847	LT	0.218811	4.57016	0.00420273	LT	1.35007	0.740703	0.161764	GT	0.631545	1.58342	0.00535329	LT	0.467787	2.13772	0.0177626	LT	156	157	158	-21267	-21079	-20890	-966	-958	-949
102749_at	P	A	A	A	155.3	122.418	188.182	136.5	40.5794	232.421	94.9333	54.3685	135.498	38.9333	13.2024	64.6642	1.13773	0.878944	0.47221	GT	1.63588	0.61129	0.074468	GT	3.98887	0.250698	0.00359145	GT	1.43785	0.695482	0.583016	GT	3.50599	0.285226	0.101807	GT	2.43836	0.410112	0.130815	GT	-407	-404	-401	168	170	172	-1966	-1946	-1926
102750_at	P	P	P	P	1872.95	1559.21	2186.69	2579.87	2190.34	2969.4	2149.47	1667.72	2631.21	2085.23	1486.44	2684.03	0.725987	1.37743	0.0490749	LT	0.871356	1.14764	0.370519	LT	0.898197	1.11334	0.533565	LT	1.20024	0.83317	0.24709	GT	1.23721	0.808272	0.240648	GT	1.0308	0.970117	0.845881	GT	-610	-609	-607	-2919	-2907	-2896	-2372	-2363	-2354
102751_at	P	A	P	P	940.35	638.037	1242.66	503.167	150.411	855.922	890.467	779.264	1001.67	913.833	746.698	1080.97	1.86886	0.535084	0.0621184	GT	1.05602	0.946952	0.996673	GT	1.02902	0.971801	0.925782	GT	0.56506	1.76973	0.11084	LT	0.550611	1.81616	0.108553	LT	0.97443	1.02624	0.863209	LT	-1480	-1474	-1469	923	928	933	393	395	397
102752_at	P	P	P	P	5729.03	4314.39	7143.67	2735.43	1999.16	3471.71	4384.2	2640.97	6127.43	3998.77	2997.19	5000.34	2.09438	0.477469	0.00778539	GT	1.30675	0.76526	0.244692	GT	1.4327	0.697983	0.116515	GT	0.62393	1.60274	0.133344	LT	0.684069	1.46184	0.114859	LT	1.09639	0.912086	0.776815	GT	813	815	817	-3069	-3057	-3046	3350	3362	3375
102753_at	P	A	P	P	1808.13	1296.12	2320.14	943.567	394.462	1492.67	1168.6	861.113	1476.09	1476.07	1353.74	1598.4	1.91628	0.521846	0.0866741	GT	1.54726	0.646302	0.228511	GT	1.22497	0.816348	0.650319	GT	0.807433	1.23849	0.415344	LT	0.639244	1.56435	0.135662	LT	0.791699	1.26311	0.137798	LT	-1725	-1718	-1712	-462	-459	-457	1026	1032	1037
102754_at	P	P	P	P	1251.2	713.222	1789.18	492.533	347.223	637.844	907.5	817.269	997.731	1043.4	950.825	1135.98	2.54034	0.393649	0.0399745	GT	1.37873	0.725304	0.534286	GT	1.19916	0.833919	0.836963	GT	0.542736	1.84251	0.0217387	LT	0.472047	2.11844	0.0107558	LT	0.869753	1.14975	0.110156	LT	439	440	442	649	653	656	1749	1759	1768
102758_at	P	P	P	P	228.05	149.774	306.326	212.933	156.297	269.57	213.5	150.141	276.859	308	201.227	414.773	1.07099	0.933713	0.964966	GT	1.06815	0.936198	0.960641	GT	0.740422	1.35058	0.272056	LT	0.997346	1.00266	0.994066	LT	0.691342	1.44646	0.218122	LT	0.693182	1.44262	0.229719	LT	735	739	743	333	336	338	622	626	630
102759_at	P	A	P	P	921.367	741.52	1101.21	375.033	323.981	426.086	488	332.833	643.167	544.733	447.22	642.247	2.45676	0.40704	0.00111895	GT	1.88805	0.529648	0.0146547	GT	1.69141	0.591223	0.0202154	GT	0.768511	1.30122	0.286175	LT	0.688471	1.45249	0.0291131	LT	0.895851	1.11626	0.54566	LT	-505	-503	-501	853	858	862	-808	-804	-800
102761_at	P	P	P	P	1449.23	1295.59	1602.87	4009.83	3162	4857.67	2860.1	2607.67	3112.53	2410.3	1994.97	2825.63	0.36142	2.76687	2.47839e-05	LT	0.506707	1.97353	5.80391e-05	LT	0.601267	1.66316	0.00109447	LT	1.40199	0.713272	0.0522197	GT	1.66362	0.601097	0.0246882	GT	1.18662	0.842733	0.159589	GT	126	127	127	-1283	-1278	-1274	889	892	895
102763_at	P	A	P	P	772.983	498.938	1047.03	210.533	17.372	403.695	635.433	444.99	825.877	319.033	272.707	365.36	3.67155	0.272365	0.0205718	GT	1.21647	0.822053	0.706169	GT	2.42289	0.41273	0.0355858	GT	0.331322	3.01821	0.0997868	LT	0.65991	1.51536	0.31376	LT	1.99175	0.502072	0.0228794	GT	-1395	-1385	-1374	939	949	960	367	371	375
102765_at	P	P	P	P	1267.4	1119.49	1415.31	896.967	725.543	1068.39	1137.67	1019.83	1255.51	1129.93	989.111	1270.76	1.41298	0.707722	0.0147977	GT	1.11403	0.897638	0.318986	GT	1.12166	0.891536	0.296663	GT	0.788427	1.26835	0.0852611	LT	0.793823	1.25973	0.103385	LT	1.00684	0.993202	0.92638	GT	1831	1835	1838	-1277	-1273	-1269	434	435	436
102767_at	P	P	P	P	1684.62	1216.65	2152.58	1204.37	946.632	1462.1	1528.67	1388.04	1669.29	2113.63	1613.38	2613.89	1.39876	0.71492	0.263669	GT	1.10202	0.907427	0.856698	GT	0.797024	1.25467	0.299676	LT	0.787854	1.26927	0.116042	LT	0.569809	1.75497	0.02611	LT	0.723241	1.38266	0.0666067	LT	766	769	772	3853	3873	3893	-1008	-1003	-998
102768_i_at	P	P	P	P	462.517	215.003	710.031	368.5	129.691	607.309	392.4	329.363	455.437	441.967	354.542	529.391	1.25513	0.796728	0.761052	GT	1.17869	0.848402	0.928326	GT	1.0465	0.955569	0.742919	GT	0.939093	1.06486	0.653287	LT	0.833773	1.19937	0.49994	LT	0.88785	1.12632	0.427024	LT	-667	-664	-660	255	257	259	-6084	-6036	-5988
102769_f_at	P	A	P	P	315.833	166.012	465.654	168.833	23.5489	314.118	288.8	259.702	317.898	331.767	281.231	382.303	1.87068	0.534565	0.236034	GT	1.09361	0.914406	0.836741	GT	0.951974	1.05045	0.61129	LT	0.584603	1.71056	0.271493	LT	0.508892	1.96505	0.217683	LT	0.870491	1.14878	0.220431	LT	-62099	-61737	-61376	-273	-271	-269	2455	2475	2496
102771_at	P	P	P	P	2148.08	1769.83	2526.34	1282.27	530.435	2034.1	1586.53	1480.9	1692.17	2685	2476.24	2893.76	1.67522	0.596935	0.0531434	GT	1.35395	0.738581	0.0701038	GT	0.800031	1.24995	0.113531	LT	0.808219	1.23729	0.40613	LT	0.477567	2.09395	0.0702146	LT	0.590888	1.69237	0.000528542	LT	307	308	309	1300	1306	1313	409	411	413
102772_at	P	P	P	P	1314.03	1248.76	1379.31	803.367	561.215	1045.52	1057.63	972.365	1142.9	1017.57	963.406	1071.73	1.63566	0.611375	0.00310163	GT	1.24243	0.804876	0.00225728	GT	1.29135	0.774384	0.00047427	GT	0.759589	1.3165	0.160609	LT	0.789498	1.26663	0.200913	LT	1.03937	0.962117	0.490033	GT	181	181	182	-1001	-998	-995	536	537	539
102776_at	P	P	P	P	973.583	697.671	1249.5	658.1	500.021	816.179	698.1	621.165	775.035	1146.57	1047.55	1245.59	1.47939	0.675957	0.283827	GT	1.39462	0.717042	0.377253	GT	0.849129	1.17768	0.423375	LT	0.942702	1.06078	0.621344	LT	0.573974	1.74224	0.011109	LT	0.608861	1.64241	0.00221325	LT	140	141	141	318	320	322	386	387	389
102778_at	P	P	P	P	983.867	693.777	1273.96	863.967	765.276	962.658	1021.57	803.467	1239.67	854.8	613.394	1096.21	1.13878	0.878134	0.822863	GT	0.963096	1.03832	0.735582	LT	1.15099	0.868817	0.756265	GT	0.845727	1.18241	0.287901	LT	1.01072	0.98939	0.865766	GT	1.19509	0.836754	0.374988	GT	-317	-316	-315	4697	4717	4738	-828	-824	-821
102779_at	P	P	P	P	469.717	361.29	578.143	557	448.194	665.806	859.333	316.251	1402.42	701.2	532.161	870.239	0.843297	1.18582	0.364607	LT	0.546606	1.82947	0.159629	LT	0.669875	1.49281	0.0904902	LT	0.648177	1.54279	0.4876	LT	0.794353	1.25889	0.243341	LT	1.22552	0.815981	0.847332	GT	152	152	153	-911	-906	-901	244	245	247
102780_at	P	P	P	P	1346.33	881.572	1811.09	1165.03	846.519	1483.55	1785.6	1157.2	2414	2117.67	1461.58	2773.75	1.15562	0.865338	0.800633	GT	0.753995	1.32627	0.323199	LT	0.635763	1.57291	0.13076	LT	0.65246	1.53266	0.172107	LT	0.55015	1.81769	0.0492848	LT	0.843192	1.18597	0.518081	LT	-615	-613	-610	-2131	-2119	-2107	403	406	408
102781_at	P	P	P	P	1761.58	1344.68	2178.49	2432.73	1205.44	3660.03	2875.93	2461.17	3290.69	2464.93	2338.23	2591.64	0.724117	1.38099	0.357092	LT	0.612526	1.63258	0.0591621	LT	0.714658	1.39927	0.141496	LT	0.845894	1.18218	0.46991	LT	0.986937	1.01324	0.77187	LT	1.16674	0.85709	0.135503	GT	663	666	668	1646	1655	1663	3514	3532	3550
102782_at	P	P	P	P	230.4	155.089	305.711	479.333	217.752	740.914	482.167	335.707	628.626	451.4	360.932	541.868	0.480668	2.08044	0.0773572	LT	0.477843	2.09274	0.0375193	LT	0.510412	1.9592	0.0444079	LT	0.994124	1.00591	0.847946	LT	1.06188	0.941725	0.968089	GT	1.06816	0.936191	0.778581	GT	-169718	-168888	-168059	772	777	783	406	409	412
102783_at	P	P	P	P	699.6	651.016	748.184	647.833	493.542	802.125	740.5	672.868	808.132	602.9	474.214	731.586	1.07991	0.926005	0.394342	GT	0.944767	1.05846	0.364057	LT	1.16039	0.861778	0.119173	GT	0.874859	1.14304	0.342069	LT	1.07453	0.930641	0.709893	GT	1.22823	0.81418	0.146466	GT	-949	-948	-946	-1304	-1301	-1298	-565	-563	-562
102786_at	P	P	P	P	2804.57	1713.64	3895.5	2654.83	1352.52	3957.15	3345.73	3029.61	3661.86	2778.83	2163.33	3394.34	1.0564	0.946611	0.954831	GT	0.838252	1.19296	0.414247	LT	1.00926	0.990824	0.794063	GT	0.793498	1.26024	0.366171	LT	0.955377	1.04671	0.739213	LT	1.20401	0.83056	0.175847	GT	185	186	187	483	486	489	-2541	-2523	-2505
102788_s_at	P	A	P	A	288.233	265.092	311.375	232.533	93.1643	371.902	304.9	185.522	424.278	388.933	349.724	428.143	1.23954	0.806754	0.202299	GT	0.945337	1.05782	0.94103	LT	0.741087	1.34937	0.00348474	LT	0.762654	1.31121	0.460883	LT	0.597875	1.67259	0.136525	LT	0.783939	1.27561	0.285983	LT	492	494	495	-1972	-1963	-1953	4006	4025	4045
102789_at	P	P	P	P	1567.13	1022.26	2112.01	934.5	857.616	1011.38	1758.87	979.38	2538.35	1456.1	1156.44	1755.76	1.67698	0.596312	0.255854	GT	0.89099	1.12235	0.664437	LT	1.07625	0.929149	0.950329	GT	0.531308	1.88215	0.0776089	LT	0.641783	1.55816	0.0197624	LT	1.20793	0.827863	0.613787	GT	-771	-767	-764	351	353	356	-3470	-3448	-3426
102790_at	P	P	P	P	9464.7	8178.5	10750.9	7608.77	4656.23	10561.3	8122.37	6546.27	9698.46	8628.07	6488.06	10768.1	1.24392	0.80391	0.183563	GT	1.16526	0.858175	0.258368	GT	1.09697	0.911605	0.496329	GT	0.936767	1.0675	0.687794	LT	0.881862	1.13396	0.565638	LT	0.941389	1.06226	0.760254	LT	-5390	-5378	-5366	-905	-903	-900	-590	-589	-587
102791_at	A	P	A	A	99.1167	1.23227	197.001	618.333	79.3432	1157.32	25.1667	13.16	37.1734	99.5	81.7745	117.225	0.160296	6.23844	0.0589983	LT	3.93841	0.25391	0.231639	GT	0.996147	1.00387	0.433519	LT	24.5695	0.0407008	0.031751	GT	6.21441	0.160916	0.176241	GT	0.252931	3.95364	0.00484118	LT	-550	-542	-535	291	297	303	-143	-141	-138
102792_at	P	P	P	P	1798.33	1315.95	2280.71	1366.03	1109.11	1622.95	969.733	792.76	1146.71	1447.87	1339.35	1556.39	1.31646	0.759611	0.310772	GT	1.85446	0.53924	0.0310525	GT	1.24206	0.805116	0.441768	GT	1.40867	0.70989	0.0569166	GT	0.94348	1.05991	0.55079	LT	0.669767	1.49306	0.0139457	LT	-2465	-2458	-2451	4171	4188	4205	-38748	-38592	-38435
102796_at	P	P	P	P	2627.17	1973.43	3280.9	1555.8	1066.24	2045.36	3060.5	1548.91	4572.09	2240.53	1979.51	2501.56	1.68863	0.592197	0.0692092	GT	0.858411	1.16494	0.630763	LT	1.17256	0.852833	0.600068	GT	0.508348	1.96716	0.106606	LT	0.694388	1.44012	0.0975505	LT	1.36597	0.732081	0.397027	GT	-389	-388	-386	-215	-214	-212	387	389	391
102798_at	P	P	P	P	287.283	224.991	349.575	389.333	221.497	557.169	1120.73	963.787	1277.68	200.867	155.931	245.803	0.737885	1.35522	0.265592	LT	0.256335	3.90114	4.01736e-05	LT	1.43022	0.699194	0.0714565	GT	0.347392	2.8786	0.0145119	LT	1.93827	0.515925	0.0957653	GT	5.57949	0.179228	0.000214804	GT	109	109	110	-310	-308	-306	638	642	645
102800_at	P	P	P	P	1029.55	902.197	1156.9	1797.43	934.283	2660.58	2091.9	1362.18	2821.62	1312.47	1073.53	1551.4	0.572789	1.74584	0.0336989	LT	0.49216	2.03186	0.00331263	LT	0.784439	1.2748	0.064566	LT	0.859235	1.16383	0.60626	LT	1.36951	0.730189	0.396838	GT	1.59387	0.627404	0.113125	GT	66	67	67	340	342	345	120	121	122
102803_at	P	P	P	P	424.917	372.577	477.257	430.667	378.802	482.532	405.2	302.242	508.158	575.033	459.764	690.302	0.986649	1.01353	0.851141	LT	1.04866	0.953599	0.680515	GT	0.738943	1.35328	0.0345689	LT	1.06285	0.940867	0.630209	GT	0.748942	1.33522	0.0781267	LT	0.704655	1.41913	0.0962311	LT	-1275	-1272	-1269	-1317	-1312	-1308	-456	-455	-453
102804_at	P	P	P	P	906.667	769.578	1043.75	924.533	876.519	972.548	1034.17	705.794	1362.54	1095.6	811.049	1380.15	0.980675	1.01971	0.780808	LT	0.876712	1.14062	0.466264	LT	0.827553	1.20838	0.261375	LT	0.893989	1.11858	0.617875	LT	0.84386	1.18503	0.361419	LT	0.943927	1.0594	0.781552	LT	-4938	-4927	-4915	-4437	-4422	-4407	1647	1653	1658
102807_at	P	P	P	P	4055.25	3548.48	4562.02	3560.53	3188.21	3932.86	3883.2	3615.94	4150.46	3952.57	3596.27	4308.86	1.13894	0.878006	0.307985	GT	1.04431	0.957574	0.76815	GT	1.02598	0.974679	0.88718	GT	0.916907	1.09062	0.238636	LT	0.900816	1.11011	0.214814	LT	0.98245	1.01786	0.788403	LT	4497	4504	4511	7064	7080	7096	673	675	676
102809_s_at	P	P	P	P	493.1	460.893	525.307	907.067	715.384	1098.75	617.933	531.068	704.799	1151.3	978.809	1323.79	0.54362	1.83952	0.000178038	LT	0.797983	1.25316	0.0134176	LT	0.428298	2.33482	7.12e-06	LT	1.4679	0.681244	0.0396076	GT	0.787863	1.26926	0.135075	LT	0.536727	1.86315	0.00437821	LT	10666	10694	10721	-2410	-2402	-2393	3565	3578	3591
102811_at	P	P	P	P	1189.58	922.041	1457.13	1241.1	943.209	1538.99	2053.03	1660.55	2445.52	1262.2	889.706	1634.69	0.958491	1.04331	0.765498	LT	0.579427	1.72584	0.0292126	LT	0.942468	1.06104	0.750606	LT	0.60452	1.6542	0.0364031	LT	0.983283	1.017	0.972634	LT	1.62655	0.614798	0.0597092	GT	1218	1222	1225	1809	1816	1824	599	601	603
102812_i_at	P	P	P	P	1042.07	578.825	1505.31	886.367	498.095	1274.64	821.867	443.155	1200.58	730.333	420.989	1039.68	1.17566	0.850585	0.765886	GT	1.26793	0.788689	0.603043	GT	1.42684	0.700851	0.40715	GT	1.07848	0.927231	0.822994	GT	1.21365	0.823963	0.585529	GT	1.12533	0.888628	0.757511	GT	455	458	460	2966	2985	3004	-1509	-1499	-1490
102813_f_at	P	P	P	P	863.383	585.263	1141.5	865.867	429.936	1301.8	672.467	357.057	987.877	527.5	443.92	611.08	0.997132	1.00288	0.976586	LT	1.28391	0.778874	0.464179	GT	1.63675	0.610968	0.14906	GT	1.2876	0.77664	0.52304	GT	1.64145	0.609216	0.183634	GT	1.27482	0.784425	0.450339	GT	451	452	454	3904	3925	3946	474	476	479
102815_at	P	P	P	P	5091.33	4301.99	5880.67	4165.6	3753.08	4578.12	5283.53	5014.81	5552.26	3557.43	3170.49	3944.38	1.22223	0.818175	0.139487	GT	0.963623	1.03775	0.657822	LT	1.43118	0.698723	0.0191157	GT	0.788412	1.26837	0.013285	LT	1.17096	0.854003	0.105477	GT	1.48521	0.673306	0.00310305	GT	-3947	-3940	-3934	-1461	-1458	-1454	967	969	972
102817_at	A	P	A	A	217.183	165.107	269.26	395.2	202.448	587.952	308.8	147.661	469.939	240.2	207.408	272.992	0.549553	1.81966	0.0786008	LT	0.703314	1.42184	0.279686	LT	0.904177	1.10598	0.500539	LT	1.27979	0.781377	0.589266	GT	1.6453	0.607794	0.244489	GT	1.2856	0.77785	0.587652	GT	103	103	104	163	164	165	-593	-589	-584
102821_s_at	P	P	P	P	27160.1	22892.8	31427.5	32193.8	25983.1	38404.6	24425.7	20686	28165.4	23581.4	21706.1	25456.7	0.843643	1.18533	0.235249	LT	1.11195	0.899321	0.494517	GT	1.15176	0.868238	0.346867	GT	1.31803	0.758706	0.0891548	GT	1.36522	0.732483	0.0422436	GT	1.0358	0.965437	0.742289	GT	2223	2226	2230	8766	8786	8806	5729	5742	5755
102827_at	P	P	P	P	3786.15	2802.34	4769.96	2398.47	1666.63	3130.31	4019.03	3439.36	4598.71	3649.43	2639.15	4659.71	1.57857	0.633484	0.206943	GT	0.942055	1.06151	0.670683	LT	1.03746	0.96389	0.962598	GT	0.596777	1.67567	0.032084	LT	0.657216	1.52157	0.106483	LT	1.10128	0.908038	0.523495	GT	284	285	287	379	381	384	2463	2479	2496
102833_at	P	A	P	P	1114.83	947.236	1282.43	482.1	41.6475	922.552	812.767	765.361	860.173	1158.6	930.924	1386.28	2.31245	0.432441	0.0126681	GT	1.37165	0.729048	0.0336112	GT	0.962225	1.03926	0.751578	LT	0.593159	1.68589	0.174726	LT	0.416106	2.40324	0.0764432	LT	0.701508	1.4255	0.030824	LT	56	57	57	728	734	739	154	155	156
102835_at	P	P	P	P	2041.87	1704.42	2379.31	2036.67	1113.31	2960.03	2348.93	2103.87	2594	2071.57	1660.43	2482.71	1.00255	0.997453	0.850979	GT	0.869274	1.15039	0.302616	LT	0.985663	1.01455	0.872487	LT	0.86706	1.15332	0.48052	LT	0.983153	1.01714	0.815863	LT	1.13389	0.881918	0.299993	GT	-375	-374	-373	-1052	-1049	-1045	827	830	833
102836_at	P	A	A	A	739.817	622.417	857.216	540.967	451.674	630.259	581.9	494.761	669.039	655.133	441.171	869.096	1.36758	0.731217	0.088489	GT	1.27138	0.786546	0.175464	GT	1.12926	0.885535	0.497889	GT	0.929656	1.07567	0.544003	LT	0.825735	1.21104	0.457408	LT	0.888216	1.12585	0.667189	LT	-419	-418	-417	-6261	-6234	-6206	982	986	990
102839_at	P	P	P	P	811.717	691.169	932.264	520.067	335.953	704.181	637.733	521.961	753.506	429.333	377.859	480.808	1.56079	0.6407	0.0260596	GT	1.27282	0.78566	0.100345	GT	1.89064	0.52892	0.0010394	GT	0.815492	1.22625	0.332987	LT	1.21134	0.825535	0.4648	GT	1.4854	0.673218	0.0222046	GT	267	267	268	-2729	-2720	-2710	-3064	-3053	-3042
102840_at	P	A	P	P	320.533	156.379	484.687	427.1	23.8428	830.357	425.8	356.628	494.972	332.367	318.999	345.734	0.750488	1.33247	0.60841	LT	0.752779	1.32841	0.35535	LT	0.964397	1.03692	0.603006	LT	1.00305	0.996956	0.676329	GT	1.28503	0.778194	0.940239	GT	1.28112	0.78057	0.0536469	GT	313	315	317	632	638	644	-2143	-2124	-2104
102845_at	P	P	P	P	661.817	370.096	953.537	1516.73	882.536	2150.93	879.433	571.189	1187.68	1067.27	843.957	1290.58	0.436343	2.29177	0.140493	LT	0.752549	1.32882	0.430088	LT	0.620104	1.61263	0.274139	LT	1.72467	0.579821	0.124104	GT	1.42114	0.703661	0.229835	GT	0.824005	1.21358	0.379703	LT	-129	-129	-128	-1958	-1942	-1927	-425	-422	-418
102848_f_at	P	P	A	A	755.667	-40.24	1551.57	1216.93	298.031	2135.84	309.8	185.415	434.185	436.033	301.354	570.713	0.62096	1.61041	0.312593	LT	2.43921	0.409969	0.82639	GT	1.73305	0.577018	0.831526	GT	3.92813	0.254574	0.144313	GT	2.79092	0.358305	0.273936	GT	0.710496	1.40747	0.237833	LT	195	197	200	564	574	584	175	178	181
102850_at	P	P	P	P	1294.62	1014.65	1574.58	2449.13	1838.61	3059.66	2180.77	1456.11	2905.42	1574.87	1373.59	1776.14	0.528602	1.89178	0.00914233	LT	0.593652	1.68449	0.0397909	LT	0.822048	1.21647	0.231912	LT	1.12306	0.890424	0.581408	GT	1.55514	0.64303	0.0345066	GT	1.38473	0.722162	0.209863	GT	-708	-705	-703	-1923	-1914	-1906	1709	1717	1724
102851_s_at	P	A	P	P	316.417	250.767	382.066	83.0667	54.3502	111.783	146.9	114.419	179.381	118.433	115.149	121.718	3.80919	0.262523	0.000603954	GT	2.15396	0.464261	0.0100298	GT	2.67169	0.374295	0.00201706	GT	0.565464	1.76846	0.045654	LT	0.701379	1.42576	0.0826399	LT	1.24036	0.806217	0.16773	GT	-1096	-1092	-1087	-434	-432	-429	-3139	-3121	-3103
102853_at	P	P	P	P	1036.65	463.152	1610.15	619.867	277.419	962.314	883.133	344.978	1421.29	1118.77	415.124	1822.41	1.67238	0.597952	0.632498	GT	1.17383	0.851911	0.984885	GT	0.926601	1.07921	0.736779	LT	0.701895	1.42471	0.594032	LT	0.554063	1.80485	0.354875	LT	0.789381	1.26682	0.713021	LT	241	244	247	173	176	179	-148	-145	-143
102856_at	P	P	P	P	317.617	256.052	379.181	390.467	365.15	415.783	310.633	263.049	358.217	354.4	339.494	369.306	0.813428	1.22936	0.148918	LT	1.02248	0.978013	0.973547	GT	0.89621	1.11581	0.376144	LT	1.257	0.795544	0.0484672	GT	1.10177	0.907632	0.0720029	GT	0.876505	1.14089	0.157983	LT	595	597	598	837	840	843	626	628	630
102863_at	P	P	P	P	842.883	627.604	1058.16	777.6	352.885	1202.31	953.4	771.793	1135.01	1541.5	922.643	2160.36	1.08395	0.922548	0.767837	GT	0.884082	1.13112	0.529265	LT	0.546794	1.82884	0.0670192	LT	0.815607	1.22608	0.421663	LT	0.504444	1.98238	0.107475	LT	0.618488	1.61684	0.104459	LT	95	96	96	845	850	856	371	374	376
102865_at	P	P	P	P	157.183	106.031	208.336	162.333	123.395	201.272	168.467	114.698	222.235	251.767	186.155	317.379	0.968275	1.03276	0.742937	LT	0.933023	1.07178	0.698118	LT	0.624321	1.60174	0.0778288	LT	0.963593	1.03778	0.923818	LT	0.644777	1.55092	0.0728097	LT	0.669138	1.49446	0.138072	LT	757	761	764	-2598	-2584	-2569	-1465	-1457	-1449
102866_at	P	P	P	P	663.383	558.813	767.953	634.533	414.65	854.417	610.867	582.566	639.168	679.8	586.638	772.962	1.04547	0.956511	0.730349	GT	1.08597	0.920835	0.589165	GT	0.975851	1.02475	0.787097	LT	1.03874	0.962702	0.959516	GT	0.933412	1.07134	0.63747	LT	0.898598	1.11285	0.246655	LT	395	396	397	-727	-725	-723	-1242	-1238	-1234
102867_at	P	P	P	P	361.9	276.557	447.243	733.133	369.008	1097.26	369.833	283.747	455.92	502.7	367.841	637.559	0.493635	2.02579	0.0358869	LT	0.978549	1.02192	0.837062	LT	0.719912	1.38906	0.12229	LT	1.98233	0.504456	0.124279	GT	1.45839	0.685687	0.386261	GT	0.735694	1.35926	0.199675	LT	-503	-502	-500	619	621	624	-969	-965	-961
102870_at	P	A	A	A	224.3	194.615	253.985	121.3	7.05905	235.541	155.267	136.952	173.582	191.533	151.677	231.39	1.84913	0.540794	0.0429703	GT	1.44461	0.692228	0.0123941	GT	1.17108	0.853916	0.241975	GT	0.781237	1.28002	0.388907	LT	0.63331	1.57901	0.251329	LT	0.810651	1.23358	0.192417	LT	80	80	81	-431	-427	-424	90	91	92
102872_f_at	P	P	P	P	251.3	144.729	357.871	285.5	13.5574	557.443	353.167	128.817	577.516	311.467	149.132	473.802	0.88021	1.13609	0.945495	LT	0.711562	1.40536	0.458719	LT	0.806828	1.23942	0.564207	LT	0.8084	1.23701	0.554995	LT	0.916631	1.09095	0.657956	LT	1.13388	0.881925	0.802748	GT	105	106	107	297	301	305	496	502	509
102873_at	P	P	P	P	888.517	597.624	1179.41	1850.93	880.09	2821.78	913.5	745.007	1081.99	1558.17	1241.91	1874.42	0.480037	2.08317	0.0449857	LT	0.972651	1.02812	0.737662	LT	0.570232	1.75367	0.0397431	LT	2.0262	0.493535	0.0941167	GT	1.18789	0.841828	0.7333	GT	0.586266	1.70571	0.0182801	LT	-1409	-1404	-1399	6399	6432	6464	-6166	-6136	-6105
102875_at	P	P	P	P	458.733	379.325	538.142	536.6	395.982	677.218	494.2	450.604	537.796	476.467	401.332	551.602	0.854889	1.16974	0.369911	LT	0.928234	1.07731	0.519364	LT	0.962782	1.03866	0.728049	LT	1.0858	0.920984	0.69484	GT	1.12621	0.887936	0.560506	GT	1.03722	0.964117	0.679455	GT	248	249	249	3662	3674	3686	254	255	255
102876_at	A	P	P	A	82.45	64.1497	100.75	135	91.6311	178.369	151.333	103.209	199.457	115.6	80.3199	150.88	0.610741	1.63736	0.0456263	LT	0.544824	1.83546	0.0193191	LT	0.713235	1.40206	0.141297	LT	0.89207	1.12099	0.636666	LT	1.16782	0.856296	0.545943	GT	1.30911	0.763877	0.305589	GT	-411	-409	-408	225	226	228	283	284	286
102878_at	P	P	P	P	609.5	520.49	698.51	885.7	869.921	901.479	670.367	600.999	739.735	998.967	783.205	1214.73	0.688156	1.45316	0.0089501	LT	0.909204	1.09986	0.380792	LT	0.61013	1.63899	0.00739401	LT	1.32122	0.756878	0.00637534	GT	0.886616	1.12788	0.415959	LT	0.67106	1.49018	0.0397022	LT	156	156	157	-2312	-2304	-2296	578	580	582
102879_s_at	P	P	P	P	178.6	159.231	197.969	317.467	231.817	403.116	204.033	132.691	275.376	314.833	226.531	403.136	0.562579	1.77753	0.00226728	LT	0.875347	1.1424	0.52776	LT	0.567284	1.76278	0.00300696	LT	1.55595	0.642692	0.130245	GT	1.00836	0.991705	0.96044	GT	0.648068	1.54305	0.142695	LT	-5866	-5843	-5819	520	523	526	-2797	-2781	-2765
102881_at	P	A	A	A	320.75	217.544	423.956	315.633	187.447	443.82	275.033	172.503	377.564	271.967	210.224	333.709	1.01621	0.984048	0.993383	GT	1.16622	0.857469	0.689465	GT	1.17937	0.847909	0.696376	GT	1.14762	0.87137	0.713112	GT	1.16056	0.861654	0.702717	GT	1.01128	0.98885	0.969731	GT	-433	-431	-430	730	733	737	-237	-236	-234
102883_at	P	P	P	P	994.933	802.013	1187.85	699	559.662	838.338	769.833	706.622	833.044	896.867	876.786	916.947	1.42337	0.70256	0.0912681	GT	1.2924	0.773754	0.191009	GT	1.10934	0.901434	0.641203	GT	0.907989	1.10134	0.41093	LT	0.77938	1.28307	0.0735762	LT	0.858359	1.16501	0.0243607	LT	-345	-345	-344	-3219	-3210	-3200	3214	3223	3232
102885_at	P	P	P	P	260.517	134.242	386.791	200.1	39.1914	361.009	200.7	167.168	234.232	191.867	97.5366	286.197	1.30193	0.768089	0.639715	GT	1.29804	0.770392	0.932681	GT	1.3578	0.736485	0.783449	GT	0.99701	1.003	0.675909	LT	1.04291	0.958854	0.819673	GT	1.04604	0.955987	0.722964	GT	674	680	687	367	372	377	-1086	-1071	-1057
102887_at	P	A	P	P	103.85	74.0543	133.646	104.5	92.4988	116.501	97.5	60.0835	134.916	104.767	39.5021	170.031	0.99378	1.00626	0.801117	LT	1.06513	0.938854	0.864746	GT	0.99125	1.00883	0.928637	LT	1.07179	0.933014	0.633632	GT	0.997455	1.00255	0.788586	LT	0.93064	1.07453	0.962109	LT	3926	3946	3965	1273	1282	1291	-532	-529	-525
102888_s_at	P	A	P	P	1217.67	721.188	1714.15	511.2	252.061	770.339	1167.03	853.626	1480.44	837.167	567.316	1107.02	2.38198	0.419819	0.0574488	GT	1.04339	0.958418	0.872588	GT	1.45451	0.687517	0.42702	GT	0.438034	2.28293	0.0350904	LT	0.610631	1.63765	0.142957	LT	1.39403	0.717346	0.176601	GT	-749	-745	-741	-129591	-128670	-127750	464	467	471
102890_at	P	A	A	A	884.683	788.441	980.926	681.5	611.975	751.025	747.267	664.803	829.73	860.433	706.039	1014.83	1.29814	0.770332	0.0239737	GT	1.18389	0.844671	0.113261	GT	1.02818	0.972589	0.78949	GT	0.91199	1.0965	0.302844	LT	0.792043	1.26256	0.0911489	LT	0.868477	1.15144	0.26872	LT	-835	-833	-832	6856	6874	6893	-441	-440	-439
102891_at	P	A	P	P	373.733	284.324	463.143	239.1	212.36	265.84	244.4	214.211	274.589	423.167	391.992	454.341	1.56308	0.639761	0.123309	GT	1.52919	0.653942	0.14195	GT	0.883182	1.13227	0.469022	LT	0.978314	1.02217	0.814361	LT	0.565026	1.76983	0.00116241	LT	0.57755	1.73145	0.00159936	LT	2377	2386	2395	378	380	382	-233	-232	-231
102892_at	P	P	P	P	1651.98	1113.15	2190.82	831.1	396.207	1265.99	1134.2	776.532	1491.87	1003.97	820.072	1187.86	1.98771	0.503092	0.0536297	GT	1.45652	0.686569	0.254063	GT	1.64546	0.607734	0.126376	GT	0.732763	1.3647	0.321753	LT	0.827816	1.208	0.41309	LT	1.12972	0.885176	0.63805	GT	-247	-246	-245	7295	7332	7370	876	880	885
102893_at	P	P	P	P	813.95	565.613	1062.29	991.167	638.28	1344.05	1732.47	1016.14	2448.79	1622.07	1209.84	2034.29	0.821204	1.21772	0.441354	LT	0.469821	2.12847	0.0330485	LT	0.501798	1.99283	0.02328	LT	0.572113	1.74791	0.164356	LT	0.611052	1.63652	0.100623	LT	1.06806	0.936276	0.924821	GT	224	225	226	2464	2480	2497	1618	1629	1640
102894_g_at	P	P	P	P	1212.12	932.26	1491.97	1261.6	667.441	1855.76	1532.27	1198.46	1866.08	1799.5	1150.61	2448.39	0.960777	1.04082	0.897992	LT	0.791061	1.26412	0.295159	LT	0.673585	1.48459	0.153774	LT	0.823355	1.21454	0.402577	LT	0.701084	1.42636	0.262698	LT	0.851496	1.1744	0.532195	LT	145	145	146	493	495	498	-519	-516	-513
102895_at	P	P	P	P	492.117	229.349	754.884	415.1	147.888	682.312	412.8	155.682	669.918	481.3	193.82	768.78	1.18554	0.843499	0.928115	GT	1.19214	0.838825	0.946918	GT	1.02247	0.97802	0.84804	GT	1.00557	0.994459	0.980273	GT	0.862456	1.15948	0.779683	LT	0.857677	1.16594	0.789728	LT	274	277	280	110	112	114	-223	-220	-216
102896_at	P	P	P	P	1673.88	966.806	2380.96	3493.63	1594.2	5393.07	2100.5	1267.45	2933.55	3195.8	2391.68	3999.92	0.479124	2.08714	0.111457	LT	0.796898	1.25487	0.452077	LT	0.523776	1.90921	0.0776948	LT	1.66324	0.601237	0.327948	GT	1.0932	0.91475	0.989394	GT	0.657269	1.52145	0.166413	LT	336	338	339	-11321	-11235	-11149	385	388	391
102898_at	P	P	P	P	85.6667	63.2775	108.056	172.733	88.2038	257.263	123.367	116.318	130.416	150.267	115.473	185.061	0.495948	2.01634	0.0421544	LT	0.694407	1.44008	0.0918374	LT	0.570098	1.75409	0.0329797	LT	1.40016	0.714203	0.377767	GT	1.14951	0.869934	0.788156	GT	0.820985	1.21805	0.216643	LT	872	877	882	462	466	470	-246	-244	-242
102906_at	A	P	P	P	15.3833	3.44595	27.3207	2105.3	1155.27	3055.33	114.667	105.617	123.717	2862.67	1766.13	3959.2	0.00730696	136.856	6.73886e-05	LT	0.134157	7.45395	0.00526499	LT	0.00537378	186.089	4.18012e-05	LT	18.3602	0.0544657	0.000323214	GT	0.735433	1.35974	0.34568	LT	0.0400559	24.9651	7.60458e-05	LT	-493	-487	-481	306	312	317	276	281	286
102907_at	P	A	P	A	302.067	200.253	403.88	240	-7.73281	487.733	220.133	165.593	274.673	207.833	75.8262	339.84	1.25861	0.794527	0.340087	GT	1.3722	0.728757	0.439185	GT	1.45341	0.688038	0.309303	GT	1.09025	0.917222	0.681912	GT	1.15477	0.865972	0.842738	GT	1.05918	0.944125	0.696369	GT	188	189	191	945	954	964	2075	2096	2118
102910_at	A	A	P	A	43.4333	11.0269	75.8398	176.367	-36.9676	389.701	88.9333	7.57525	170.291	53.0667	47.2863	58.847	0.246267	4.06063	0.0677876	LT	0.488381	2.04758	0.236034	LT	0.818467	1.2218	0.337969	LT	1.98313	0.504253	0.516212	GT	3.32349	0.300888	0.236163	GT	1.67588	0.596702	0.63606	GT	184	186	188	624	633	641	-454	-448	-442
102911_at	P	P	P	P	770.267	384.32	1156.21	475.4	206.581	744.219	495.433	267.021	723.846	908.5	507.761	1309.24	1.62025	0.617189	0.560229	GT	1.55473	0.643197	0.643914	GT	0.847844	1.17946	0.531616	LT	0.959564	1.04214	0.865544	LT	0.52328	1.91102	0.183473	LT	0.545331	1.83375	0.176962	LT	-693	-688	-682	309	313	316	-406	-401	-397
102912_at	P	P	P	P	1251.07	736.057	1766.08	323.8	114.411	533.189	616.467	542.824	690.11	753.033	647.232	858.835	3.8637	0.258819	0.0207864	GT	2.02941	0.492753	0.158614	GT	1.66137	0.601913	0.336197	GT	0.525251	1.90385	0.145659	LT	0.429994	2.32561	0.0883504	LT	0.818645	1.22153	0.0957058	LT	503	506	509	391	394	398	1433	1446	1458
102919_at	P	P	P	P	809.45	734.669	884.231	2850.03	2662.44	3037.63	1816.23	689.379	2943.09	1334.33	999.827	1668.84	0.284014	3.52095	5.25e-07	LT	0.445675	2.24379	0.034263	LT	0.606633	1.64844	0.0035838	LT	1.5692	0.637267	0.206983	GT	2.13592	0.468182	0.00529695	GT	1.36115	0.734671	0.655115	GT	238	239	240	608	612	615	431	434	436
102920_at	P	P	P	P	1720.02	1052.97	2387.07	1120.8	408.631	1832.97	1016.23	813.469	1219	1274.8	1050.66	1498.94	1.53463	0.651622	0.277735	GT	1.69254	0.590828	0.197284	GT	1.34924	0.741156	0.517393	GT	1.1029	0.906704	0.918142	GT	0.879197	1.1374	0.565165	LT	0.797171	1.25444	0.176286	LT	244	245	247	185	187	188	1235	1243	1252
102924_at	P	A	P	P	200.167	152.302	248.031	210.867	149.603	272.131	149.533	142.715	156.351	267.967	205.784	330.15	0.949257	1.05346	0.757602	LT	1.33861	0.747044	0.158544	GT	0.746983	1.33872	0.130849	LT	1.41016	0.709137	0.109909	GT	0.786914	1.27079	0.273429	LT	0.55803	1.79202	0.00963655	LT	-572	-571	-569	-577	-575	-573	-220	-219	-218
102926_at	P	A	P	A	214.5	151.87	277.13	244.5	112.868	376.132	175.5	124.736	226.264	237.267	187.389	287.144	0.877301	1.13986	0.687182	LT	1.22222	0.818182	0.486929	GT	0.904046	1.10614	0.539255	LT	1.39316	0.717791	0.393345	GT	1.03049	0.970416	0.921997	GT	0.739674	1.35195	0.14911	LT	-706	-704	-701	1337	1344	1350	-1409	-1402	-1395
102927_s_at	P	P	P	P	1060	795.404	1324.6	1449.53	987.759	1911.31	1183.33	1122.41	1244.25	1054.53	813.575	1295.49	0.73127	1.36748	0.149784	LT	0.895775	1.11635	0.431726	LT	1.00518	0.994843	0.923068	GT	1.22496	0.816355	0.312628	GT	1.37457	0.727499	0.180457	GT	1.12214	0.891155	0.327826	GT	847	849	851	-4078	-4064	-4051	5844	5864	5883
102933_at	P	P	P	P	704.167	423.025	985.308	552.667	292.878	812.455	837.333	491.346	1183.32	738.967	559.843	918.091	1.27413	0.784852	0.61237	GT	0.840963	1.18911	0.531702	LT	0.952907	1.04942	0.675994	LT	0.660032	1.51508	0.275753	LT	0.747891	1.33709	0.281883	LT	1.13311	0.882524	0.760858	GT	-319	-317	-316	1170	1177	1184	456	459	462
102934_s_at	P	P	P	P	1047.37	870.665	1224.07	652.767	158.205	1147.33	864.9	752.928	976.872	1051.4	898.591	1204.21	1.6045	0.623246	0.0737439	GT	1.21097	0.825785	0.220483	GT	0.996164	1.00385	0.906144	LT	0.754731	1.32498	0.347149	LT	0.620855	1.61068	0.199665	LT	0.822617	1.21563	0.129487	LT	-944	-941	-938	-334	-333	-331	9565	9606	9647
102935_at	P	P	P	P	726.933	615.89	837.977	382.8	287.223	478.377	545.533	275.436	815.631	622.333	574.771	669.896	1.89899	0.526596	0.00336727	GT	1.33252	0.750459	0.163571	GT	1.16808	0.856108	0.298686	GT	0.701699	1.42511	0.390468	LT	0.615104	1.62574	0.0189142	LT	0.876593	1.14078	0.512324	LT	-2679	-2671	-2663	429	430	432	480	482	483
102937_at	P	A	A	A	233.467	127.177	339.757	288.333	131.455	445.212	315.033	284.94	345.127	219.633	137.404	301.863	0.809711	1.23501	0.5437	LT	0.741086	1.34937	0.35775	LT	1.06298	0.940748	0.809568	GT	0.915247	1.0926	0.60175	LT	1.31279	0.761734	0.563888	GT	1.43436	0.697175	0.143644	GT	494	498	501	-296	-293	-290	1326	1338	1350
102942_at	A	A	P	A	371.35	269.289	473.411	494.033	436.181	551.886	416.8	316.966	516.634	319.5	200.025	438.975	0.75167	1.33037	0.174574	LT	0.890955	1.12239	0.525135	LT	1.16228	0.860374	0.606023	GT	1.1853	0.843668	0.239887	GT	1.54627	0.646717	0.102687	GT	1.30454	0.766555	0.297574	GT	700	702	705	-2736	-2724	-2712	397	399	401
102943_at	P	P	P	P	822.9	691.664	954.136	716.9	564.964	868.836	630.467	570.072	690.861	688.7	610.395	767.005	1.14786	0.871187	0.364048	GT	1.30522	0.766152	0.0768245	GT	1.19486	0.836918	0.222672	GT	1.13709	0.879435	0.372135	GT	1.04095	0.960664	0.808585	GT	0.915445	1.09237	0.303579	LT	-3410	-3403	-3397	882	884	887	-1155	-1152	-1148
102944_at	P	A	A	P	555.783	460.568	650.999	438.167	355.267	521.067	533.8	396.6	671	702.1	663.094	741.106	1.26843	0.788377	0.193028	GT	1.04118	0.960446	0.831625	GT	0.791601	1.26326	0.119725	LT	0.820844	1.21826	0.339161	LT	0.62408	1.60236	0.00939434	LT	0.760291	1.31529	0.114471	LT	-1768	-1763	-1757	624	627	629	484	486	488
102948_at	A	P	P	A	4.53333	2.21225	6.85442	1167.47	-291.245	2626.18	177.733	-6.52778	361.994	7.43333	2.21167	12.655	0.00388305	257.529	2.93517e-05	LT	0.0255064	39.2059	0.0294255	LT	0.609865	1.63971	0.234661	LT	6.56864	0.152238	0.19229	GT	157.058	0.00636706	0.00332918	GT	23.9103	0.041823	0.209428	GT	-10760	-10610	-10459	1585	1617	1650	-1031	-1011	-991
102949_g_at	A	P	A	A	16.6167	12.3956	20.8378	1440.97	-139.451	3021.38	245.833	-29.1129	520.78	20.1333	17.9265	22.3402	0.0115316	86.7182	2.55827e-05	LT	0.0675932	14.7944	0.00891682	LT	0.825331	1.21163	0.245127	LT	5.86156	0.170603	0.133815	GT	71.5712	0.0139721	0.00277494	GT	12.2103	0.0818983	0.09361	GT	-361	-357	-354	-2330	-2295	-2260	5004	5080	5157
102952_g_at	P	P	P	P	584.867	507.171	662.562	313.933	233.352	394.514	516.3	375.014	657.586	523.867	432.268	615.466	1.86303	0.536761	0.00185003	GT	1.1328	0.882765	0.353966	GT	1.11644	0.895703	0.391943	GT	0.608044	1.64462	0.0528019	LT	0.599262	1.66872	0.0292674	LT	0.985556	1.01466	0.888737	LT	302	303	304	-936	-933	-930	833	835	838
102955_at	P	P	P	P	421.2	341.323	501.077	1167.1	537.857	1796.34	1199.73	449.756	1949.71	570.2	443.234	697.166	0.360895	2.77089	0.00438258	LT	0.351078	2.84837	0.0214462	LT	0.738688	1.35375	0.100566	LT	0.9728	1.02796	0.933481	LT	2.04683	0.488561	0.0967387	GT	2.10406	0.475272	0.237208	GT	65	65	66	170	171	173	183	184	185
102960_at	P	P	P	P	2122.4	1835.25	2409.55	1770.03	1611.58	1928.49	1894.8	1724.13	2065.47	1555.4	1362.08	1748.72	1.19907	0.833977	0.15451	GT	1.12012	0.892763	0.368774	GT	1.36454	0.73285	0.0299595	GT	0.934153	1.07049	0.348362	LT	1.13799	0.878741	0.168381	GT	1.21821	0.820878	0.0645906	GT	5910	5920	5929	1450	1453	1456	852	854	856
102963_at	P	A	P	P	513.633	370.917	656.35	269.4	106.233	432.567	477.5	222.397	732.603	523.067	207.532	838.602	1.90658	0.524499	0.0548872	GT	1.07567	0.929652	0.725344	GT	0.981965	1.01837	0.959296	LT	0.564188	1.77246	0.269776	LT	0.51504	1.9416	0.185372	LT	0.912886	1.09543	0.834954	LT	-682	-679	-676	-285	-283	-281	1436	1445	1454
102964_at	P	P	P	P	1716.88	1500.9	1932.87	2144.53	1943.17	2345.9	2208.73	1967.76	2449.71	2209.23	2094.51	2323.95	0.800586	1.24909	0.0492066	LT	0.777316	1.28648	0.0337956	LT	0.77714	1.28677	0.0262444	LT	0.970934	1.02994	0.714848	LT	0.970714	1.03017	0.600822	LT	0.999774	1.00023	0.968372	LT	174	175	175	22776	22847	22918	507	509	510
102965_at	P	P	P	P	446.267	372.029	520.504	1010.8	792.895	1228.71	563.567	472.802	654.332	1459.3	999.797	1918.8	0.441498	2.26501	0.000632733	LT	0.791861	1.26285	0.112894	LT	0.305809	3.27002	0.000150581	LT	1.79358	0.557545	0.0126249	GT	0.692661	1.44371	0.131697	LT	0.38619	2.5894	0.00610524	LT	214	215	215	336	337	339	324	326	327
102966_at	P	A	P	P	222.7	141.225	304.175	39.5667	9.23378	69.8995	165.4	122.211	208.589	320.367	224.712	416.021	5.62848	0.177668	0.00434496	GT	1.34643	0.742703	0.602817	GT	0.695141	1.43856	0.24807	LT	0.239218	4.18029	0.0157414	LT	0.123504	8.09688	0.00500545	LT	0.516283	1.93692	0.0322278	LT	233	235	237	193	195	197	1387	1403	1418
102969_at	P	P	P	P	917.05	814.475	1019.62	748.1	379.415	1116.78	729.2	520.705	937.695	888.5	616.439	1160.56	1.22584	0.815768	0.18671	GT	1.25761	0.795158	0.0997194	GT	1.03213	0.968868	0.725299	GT	1.02592	0.974736	0.974462	GT	0.841981	1.18768	0.496306	LT	0.820709	1.21846	0.405676	LT	2454	2462	2470	-2846	-2833	-2820	316	317	319
102970_at	P	A	A	A	331.55	214.742	448.358	224.633	104.006	345.26	271.8	114.091	429.509	295.333	272.498	318.168	1.47596	0.677525	0.225826	GT	1.21983	0.819786	0.498042	GT	1.12263	0.890766	0.841122	GT	0.826466	1.20997	0.656841	LT	0.760609	1.31474	0.308181	LT	0.920316	1.08658	0.592198	LT	1196	1201	1207	-269	-267	-265	316	318	320
102976_at	P	P	P	P	615.85	413.759	817.941	444.667	245.794	643.539	367	360.628	373.372	551.133	409.978	692.288	1.38497	0.722037	0.349538	GT	1.67807	0.595924	0.133777	GT	1.11742	0.894915	0.853084	GT	1.21163	0.825337	0.663066	GT	0.806822	1.23943	0.430248	LT	0.665901	1.50173	0.0417029	LT	194	195	196	315	316	318	-76630	-76178	-75726
102979_at	P	A	P	P	150.967	89.401	212.532	69.3667	16.0902	122.643	198.267	196.505	200.028	136.067	101.632	170.502	2.17636	0.459483	0.194407	GT	0.761432	1.31331	0.351659	LT	1.10951	0.901303	0.897417	GT	0.349866	2.85824	0.0729648	LT	0.509799	1.96156	0.180431	LT	1.45713	0.686281	0.0443623	GT	-5646	-5617	-5588	-121	-120	-120	258	260	262
102980_at	P	P	P	P	685.083	545.139	825.027	658.9	563.433	754.367	643.833	450	837.666	1028.67	746.89	1310.44	1.03974	0.961781	0.930131	GT	1.06407	0.939788	0.769587	GT	0.665992	1.50152	0.065896	LT	1.0234	0.977134	0.821585	GT	0.640538	1.56119	0.0647698	LT	0.625891	1.59772	0.10492	LT	-1293	-1290	-1287	332	333	334	3574	3587	3600
102981_at	P	A	P	P	203.617	142.922	264.311	262.2	214.972	309.428	324.367	273.92	374.814	278.333	262.704	293.962	0.77657	1.28771	0.268984	LT	0.627736	1.59303	0.0806459	LT	0.731557	1.36695	0.177838	LT	0.808344	1.2371	0.157268	LT	0.942036	1.06153	0.528754	LT	1.16539	0.858082	0.16141	GT	-8796	-8753	-8711	-632	-628	-624	-687	-683	-678
102982_at	P	P	P	P	1068.38	705.847	1430.92	783.867	369.972	1197.76	1482.7	1183.04	1782.36	1553.27	1225.97	1880.56	1.36297	0.733694	0.460944	GT	0.720566	1.3878	0.243962	LT	0.68783	1.45385	0.199661	LT	0.528675	1.89152	0.0953399	LT	0.504657	1.98154	0.0807749	LT	0.954569	1.04759	0.775267	LT	586	590	593	2458	2477	2496	-601	-597	-592
102983_at	P	P	P	P	1282.38	1136.16	1428.61	1489.77	1299.57	1679.96	1739.8	1513.76	1965.84	1932.07	1429.52	2434.62	0.860795	1.16172	0.167829	LT	0.737087	1.35669	0.0173962	LT	0.663737	1.50662	0.0136933	LT	0.856286	1.16783	0.167932	LT	0.771074	1.29689	0.158749	LT	0.900487	1.11051	0.551673	LT	163	163	163	-719	-717	-715	881	884	886
102984_g_at	P	P	P	P	2829.02	2107.94	3550.1	2756.4	2496.91	3015.89	3619.97	3060.65	4179.29	3751.7	3293.92	4209.48	1.02634	0.974331	0.959439	GT	0.781504	1.27958	0.172025	LT	0.754063	1.32615	0.12244	LT	0.761443	1.3133	0.0427955	LT	0.734707	1.36109	0.0168806	LT	0.964887	1.03639	0.722129	LT	140	140	141	-483	-481	-479	623	625	627
102985_at	P	P	P	P	1294.33	1139.67	1448.99	1951.43	1626.36	2276.51	1550.03	1074.43	2025.64	1789.87	1552.01	2027.72	0.663273	1.50767	0.00621301	LT	0.835036	1.19755	0.305011	LT	0.723145	1.38285	0.0144224	LT	1.25896	0.794305	0.261284	GT	1.09027	0.917206	0.475416	GT	0.866005	1.15473	0.418033	LT	-15404	-15372	-15340	-484	-483	-481	1360	1364	1368
102986_at	P	P	P	P	352.4	315.469	389.331	579.1	432.681	725.519	378.167	322.466	433.867	396.7	351.166	442.234	0.60853	1.6433	0.00325811	LT	0.931864	1.07312	0.446611	LT	0.888329	1.12571	0.19641	LT	1.53134	0.653025	0.0454965	GT	1.45979	0.685028	0.0580667	GT	0.953281	1.04901	0.62676	LT	-2186	-2181	-2177	285	286	287	611	613	615
102988_at	P	P	P	P	3191.9	2796.62	3587.18	1910.33	1653.55	2167.12	2387.67	2226.03	2549.31	2565.87	2327.6	2804.13	1.67086	0.598494	0.00194994	GT	1.33683	0.748039	0.0237158	GT	1.24399	0.803868	0.0734172	GT	0.800084	1.24987	0.0454599	LT	0.744518	1.34315	0.0250489	LT	0.93055	1.07463	0.295743	LT	3324	3330	3335	707	708	710	-1822	-1818	-1814
102991_s_at	P	P	P	P	453.25	326.289	580.211	548.467	468.851	628.082	335.433	232.284	438.583	355.433	315.384	395.483	0.826395	1.21008	0.290733	LT	1.35124	0.740063	0.256276	GT	1.2752	0.784188	0.357341	GT	1.6351	0.611584	0.0492601	GT	1.54309	0.648049	0.00981157	GT	0.943731	1.05962	0.672332	LT	-256	-255	-255	-671	-668	-666	-348	-346	-345
102992_at	P	A	A	A	182.667	147.188	218.145	208.3	131.916	284.684	160.067	115.854	204.28	150.033	120.672	179.394	0.87694	1.14033	0.557817	LT	1.14119	0.876277	0.485597	GT	1.21751	0.82135	0.289945	GT	1.30133	0.768443	0.366747	GT	1.38836	0.720275	0.237971	GT	1.06687	0.937318	0.775369	GT	1795	1800	1805	378	379	381	584	586	589
102993_at	P	P	P	P	1666.27	1434.68	1897.85	1585.97	1313.57	1858.36	1638.23	1431.31	1845.15	1408.5	1198.07	1618.93	1.05063	0.951808	0.709411	GT	1.01711	0.983176	0.936784	GT	1.18301	0.845303	0.195323	GT	0.968096	1.03296	0.758868	LT	1.126	0.888102	0.390199	GT	1.1631	0.859768	0.20445	GT	191	191	191	1920	1926	1931	5205	5219	5234
102996_at	P	P	P	P	897.567	847.271	947.863	1085.07	893.533	1276.6	1020.87	976.803	1064.93	996.5	910.285	1082.72	0.8272	1.2089	0.0362045	LT	0.87922	1.13737	0.0210279	LT	0.900719	1.11022	0.0789275	LT	1.06289	0.940833	0.587317	GT	1.08888	0.918377	0.468229	GT	1.02445	0.976131	0.635392	GT	159	160	160	1805	1810	1816	424	425	426
103001_at	P	P	P	P	4928.23	4250.2	5606.27	2923.77	2894.84	2952.7	4454.8	3363.48	5546.12	2839.37	2265.82	3412.91	1.68558	0.593269	0.002191	GT	1.10627	0.903934	0.467194	GT	1.73568	0.576143	0.0033581	GT	0.656318	1.52365	0.0272491	LT	1.02972	0.971133	0.711978	GT	1.56894	0.637372	0.0453541	GT	-565	-563	-562	-2287	-2280	-2272	482	484	486
103002_at	P	P	P	P	2184	1810.71	2557.29	2527.27	2158.74	2895.8	2411.53	2102.56	2720.51	2208.67	2068.03	2349.3	0.864175	1.15717	0.276668	LT	0.905648	1.10418	0.426052	LT	0.988832	1.01129	0.827958	LT	1.04799	0.954206	0.665963	GT	1.14425	0.873935	0.173918	GT	1.09185	0.915876	0.323575	GT	486	487	488	1331	1335	1339	-3122	-3114	-3105
103005_s_at	P	P	P	P	832.533	554.471	1110.6	1775.57	1461.66	2089.48	1172.17	1141.87	1202.47	1369.47	1195.44	1543.49	0.468883	2.13273	0.0291448	LT	0.710252	1.40795	0.192663	LT	0.607925	1.64494	0.0952434	LT	1.51477	0.660165	0.0133004	GT	1.29654	0.771284	0.0890372	GT	0.855929	1.16832	0.077921	LT	-289	-288	-287	-215	-214	-213	-1340	-1334	-1328
103006_at	P	P	P	P	1257.12	1043.99	1470.25	1573.43	759.873	2386.99	1638.97	712.692	2565.24	1506.77	918.965	2094.57	0.798964	1.25162	0.557213	LT	0.767018	1.30375	0.429447	LT	0.834314	1.19859	0.397172	LT	0.960015	1.04165	0.923374	LT	1.04424	0.95763	0.97856	GT	1.08774	0.919339	0.927469	GT	-95437	-94956	-94474	-265	-263	-261	-1132	-1124	-1116
103007_at	P	A	P	A	548.817	401.629	696.005	461.9	276.001	647.799	700.933	673.467	728.399	510.233	430.288	590.178	1.18817	0.841629	0.556739	GT	0.78298	1.27717	0.223764	LT	1.07562	0.929697	0.913903	GT	0.658979	1.5175	0.0801069	LT	0.905272	1.10464	0.561135	LT	1.37375	0.727934	0.0160019	GT	148	149	149	-294	-293	-291	343	345	347
103010_at	P	P	P	P	350.133	201.706	498.561	203.967	158.497	249.437	233.9	205.279	262.521	273.567	248.695	298.438	1.71662	0.58254	0.309417	GT	1.49694	0.668031	0.496165	GT	1.27988	0.781321	0.779261	GT	0.872025	1.14676	0.318573	LT	0.745583	1.34123	0.0643955	LT	0.855002	1.16959	0.118867	LT	168	169	170	335	338	341	387	390	393
103011_at	P	P	P	P	2116.32	1827.27	2405.36	1253.7	1114.65	1392.75	1587.37	1519.22	1655.51	1934.93	1801.15	2068.72	1.68806	0.592397	0.0028768	GT	1.33322	0.750061	0.0407363	GT	1.09374	0.914293	0.507931	GT	0.789799	1.26615	0.015883	LT	0.647929	1.54338	0.00270676	LT	0.820373	1.21896	0.00926286	LT	279	280	280	1294	1296	1299	833	835	837
103013_at	P	A	P	P	1439.98	1319.76	1560.21	838.367	745.8	930.933	1032.23	753.962	1310.5	1027.43	976.625	1078.24	1.71761	0.582206	0.000169283	GT	1.39502	0.716837	0.0207008	GT	1.40153	0.713504	0.00156398	GT	0.812187	1.23124	0.301303	LT	0.815982	1.22552	0.0288851	LT	1.00467	0.99535	0.921406	GT	-1816	-1812	-1808	-625	-624	-622	-458	-457	-455
103015_at	P	P	P	P	901.133	813.875	988.392	911	557.777	1264.22	1676.33	918.31	2434.36	1047.67	738.045	1357.29	0.989169	1.01095	0.8939	LT	0.537562	1.86025	0.00803906	LT	0.860134	1.16261	0.348875	LT	0.543448	1.8401	0.104164	LT	0.869551	1.15002	0.580305	LT	1.60006	0.624975	0.173304	GT	49	49	49	546	549	552	272	273	275
103016_s_at	A	P	P	A	470.883	-2.02084	943.788	1257.2	238.185	2276.22	1250.4	555.636	1945.16	299	241.605	356.395	0.374549	2.66988	0.0891242	LT	0.376586	2.65543	0.0438968	LT	1.57486	0.634977	0.906285	GT	1.00544	0.994591	0.822901	GT	4.20468	0.23783	0.0667432	GT	4.18194	0.239123	0.00825006	GT	-389	-385	-382	-561	-554	-548	-416	-411	-406
103017_at	P	P	P	P	2188.05	1863.02	2513.08	1267.5	634.068	1900.93	2017.57	1364.61	2670.53	1703.2	1391.08	2015.32	1.72627	0.579283	0.0280546	GT	1.0845	0.922084	0.547975	GT	1.28467	0.77841	0.0874721	GT	0.628232	1.59177	0.197504	LT	0.744187	1.34375	0.307757	LT	1.18457	0.844185	0.454398	GT	-2485	-2478	-2471	-1068	-1064	-1059	-1821	-1814	-1807
103018_at	P	P	P	P	1938.23	1353.08	2523.38	1292.4	579.561	2005.24	1567.97	1372.75	1763.18	2126.67	1462.37	2790.97	1.49972	0.666793	0.284973	GT	1.23614	0.808967	0.667291	GT	0.911395	1.09722	0.639821	LT	0.824252	1.21322	0.411098	LT	0.607712	1.64552	0.164089	LT	0.737288	1.35632	0.163152	LT	-4638	-4616	-4593	753	759	764	-391	-388	-385
103020_s_at	P	P	P	P	897.55	598.116	1196.98	434.333	242.85	625.817	1137.5	820.907	1454.09	934.2	871.178	997.222	2.0665	0.48391	0.0601545	GT	0.789055	1.26734	0.325478	LT	0.960769	1.04083	0.674468	LT	0.381832	2.61896	0.0275091	LT	0.464925	2.15088	0.036217	LT	1.21762	0.821275	0.265541	GT	76	77	77	1001	1007	1012	397	399	401
103021_r_at	P	P	P	P	118.617	66.176	171.057	73.8333	52.3164	95.3502	173.6	109.26	237.94	202.033	136.114	267.952	1.60655	0.622453	0.238893	GT	0.683276	1.46354	0.196467	LT	0.587114	1.70325	0.0863199	LT	0.425307	2.35124	0.0297542	LT	0.365451	2.73634	0.0121335	LT	0.859264	1.16379	0.560594	LT	121	121	122	-293	-291	-288	1044	1052	1061
103024_at	P	P	P	P	995.817	796.208	1195.43	1712.5	1193.98	2231.02	1702	1473.95	1930.05	1744.17	1430.31	2058.02	0.581499	1.71969	0.0251331	LT	0.585086	1.70915	0.0105994	LT	0.570941	1.75149	0.0101507	LT	1.00617	0.993869	0.932512	GT	0.981844	1.01849	0.854739	LT	0.975824	1.02477	0.859302	LT	8458	8485	8512	-7172	-7140	-7108	-2439	-2429	-2418
103025_at	P	P	P	P	588.517	436.325	740.708	1495.07	1199.03	1791.1	693.033	490.972	895.094	1258.9	999.809	1517.99	0.393639	2.5404	0.00215693	LT	0.84919	1.17759	0.421818	LT	0.467485	2.13911	0.00627827	LT	2.15728	0.463547	0.0132943	GT	1.1876	0.842036	0.323716	GT	0.550507	1.81651	0.031537	LT	586	588	589	589	592	594	830	834	838
103027_at	P	P	P	P	951.65	859.721	1043.58	381.133	323.309	438.957	682.667	247.3	1118.03	646.667	499.072	794.261	2.4969	0.400497	1.315e-05	GT	1.39402	0.717351	0.0881026	GT	1.47162	0.679522	0.00602407	GT	0.558301	1.79115	0.202628	LT	0.589381	1.69669	0.0182444	LT	1.05567	0.947266	0.924582	GT	14920	14966	15012	-18089	-18011	-17932	1875	1883	1891
103028_at	P	P	P	P	134.15	107.448	160.852	195.733	131.772	259.694	150.367	133.592	167.142	168.4	110.347	226.453	0.685371	1.45906	0.0917988	LT	0.892153	1.12088	0.436245	LT	0.796615	1.25531	0.329988	LT	1.30171	0.768222	0.220918	GT	1.16231	0.860354	0.558165	GT	0.892914	1.11993	0.716875	LT	-472	-470	-468	637	640	643	-317	-316	-314
103029_at	P	P	P	P	2467.88	1655.68	3280.09	706.9	436.346	977.454	2243.7	1536.08	2951.32	1079.03	1015.92	1142.15	3.49114	0.28644	0.00430734	GT	1.09992	0.90916	0.870673	GT	2.28712	0.43723	0.0225701	GT	0.31506	3.174	0.0117661	LT	0.655123	1.52643	0.0983928	LT	2.07936	0.480917	0.0118324	GT	491	493	495	334	336	338	-41119	-40874	-40629
103030_at	P	P	P	P	2308.12	2073.48	2542.75	936.467	313.08	1559.85	1858.73	1282.44	2435.03	1272.07	1054.79	1489.35	2.46471	0.405728	0.0033635	GT	1.24177	0.805303	0.112257	GT	1.81446	0.551128	0.00050368	GT	0.50382	1.98484	0.103788	LT	0.736177	1.35837	0.300117	LT	1.46119	0.684373	0.116693	GT	-441	-439	-437	-684	-680	-677	1782	1792	1802
103031_g_at	P	P	P	P	2376.7	1691.57	3061.83	1232.13	726.92	1737.35	1273.63	1114.12	1433.15	1062.07	664.292	1459.84	1.92893	0.518422	0.0242683	GT	1.86608	0.535883	0.0191252	GT	2.23781	0.446866	0.00967239	GT	0.967416	1.03368	0.752659	LT	1.16013	0.861974	0.62666	GT	1.1992	0.833887	0.348127	GT	681	683	685	-2207	-2196	-2185	2218	2228	2239
103032_at	P	P	P	P	1622.03	1271.55	1972.52	964.7	643.844	1285.56	1546.43	1407.31	1685.55	1402.9	1111.3	1694.5	1.68139	0.594747	0.0419975	GT	1.04889	0.953392	0.93505	GT	1.1562	0.864902	0.543573	GT	0.623823	1.60302	0.0400446	LT	0.687647	1.45423	0.117456	LT	1.10231	0.907184	0.426156	GT	1802	1807	1813	-1218	-1212	-1207	1328	1334	1340
103033_at	P	A	A	P	214.367	160.197	268.537	223.767	197.674	249.859	193.9	177.239	210.561	254	234.985	273.015	0.957992	1.04385	0.704749	LT	1.10555	0.904525	0.861717	GT	0.843963	1.18489	0.385319	LT	1.15403	0.866528	0.13405	GT	0.880971	1.13511	0.146695	LT	0.763386	1.30995	0.00955735	LT	-1621	-1616	-1611	352	354	355	-838	-834	-831
103035_at	P	P	P	P	831.5	572.328	1090.67	4362.6	3193.78	5531.42	1383.97	1124.52	1643.42	3312.57	2430.99	4194.14	0.190597	5.24666	0.000172741	LT	0.600809	1.66442	0.0413143	LT	0.251014	3.98384	0.000500566	LT	3.15224	0.317234	0.0029331	GT	1.31698	0.75931	0.25	GT	0.417793	2.39353	0.00756546	LT	-1404	-1398	-1392	-1118	-1112	-1105	-3326	-3307	-3289
103036_at	P	P	P	P	851.217	711.031	991.403	660.867	439.418	882.315	749.6	584.406	914.794	631.833	554.934	708.732	1.28803	0.776379	0.146185	GT	1.13556	0.880622	0.385681	GT	1.34722	0.742271	0.0478737	GT	0.881626	1.13427	0.537353	LT	1.04595	0.956068	0.937601	GT	1.18639	0.842894	0.276184	GT	-2976	-2970	-2963	3748	3760	3772	506	508	509
103037_at	P	A	P	P	643.717	591.582	695.852	340.2	301.707	378.693	540.3	458.647	621.953	462.5	366.836	558.164	1.89217	0.528493	4.48851e-05	GT	1.19141	0.839344	0.0585588	GT	1.39182	0.718484	0.00722321	GT	0.62965	1.58818	0.00801137	LT	0.735568	1.35949	0.0607328	LT	1.16822	0.856006	0.271538	GT	972	974	976	-584	-582	-581	-696	-694	-692
103038_at	P	A	A	A	308.533	248.012	369.055	279.967	243.019	316.915	247.433	230.609	264.257	277.333	246.052	308.615	1.10204	0.907411	0.611891	GT	1.24694	0.801966	0.205506	GT	1.1125	0.898876	0.571249	GT	1.13148	0.883796	0.188875	GT	1.0095	0.990594	0.930613	GT	0.892188	1.12084	0.17771	LT	-698	-696	-694	-1461	-1455	-1450	-239	-239	-238
103039_at	P	A	A	A	270.983	153.698	388.269	373.567	221.339	525.795	286.667	178.261	395.073	386.633	124.996	648.27	0.725395	1.37856	0.400303	LT	0.945291	1.05788	0.662339	LT	0.700879	1.42678	0.464721	LT	1.30314	0.767378	0.457654	GT	0.966204	1.03498	0.924906	LT	0.741443	1.34872	0.648951	LT	-1516	-1505	-1494	682	690	697	79	79	80
103041_at	P	A	A	A	236.6	148.603	324.597	23.4	10.2639	36.5361	81.8	37.7344	125.866	125.767	70.4173	181.116	10.1111	0.0989011	0.00113184	GT	2.89242	0.345731	0.0546824	GT	1.88126	0.531558	0.232392	GT	0.286064	3.49573	0.0402385	LT	0.186059	5.37464	0.00825284	LT	0.650411	1.53749	0.29718	LT	90	91	91	-517	-511	-505	-215	-213	-211
103043_at	P	P	P	P	610.783	389.624	831.942	239.1	123.75	354.45	278.467	222.317	334.616	411.967	385.301	438.632	2.55451	0.391465	0.063227	GT	2.19338	0.455917	0.104959	GT	1.4826	0.674489	0.467335	GT	0.858631	1.16465	0.52764	LT	0.580387	1.72299	0.107694	LT	0.675945	1.47941	0.0245527	LT	224	225	226	826	833	840	-409	-406	-403
103044_g_at	P	P	P	P	1094.73	992.508	1196.96	1277.03	1185.61	1368.46	948.333	865.587	1031.08	1432.67	1179.49	1685.84	0.857247	1.16652	0.0797611	LT	1.15438	0.866269	0.123217	GT	0.764123	1.30869	0.0250563	LT	1.34661	0.742607	0.0069097	GT	0.891368	1.12187	0.323312	LT	0.661936	1.51072	0.0153188	LT	-545	-545	-544	1303	1306	1309	-420	-419	-418
103045_at	P	A	P	P	113.017	96.4998	129.534	69.6	55.863	83.337	88.9667	64.7909	113.142	91.6667	55.9012	127.432	1.6238	0.615838	0.00525494	GT	1.27033	0.7872	0.120993	GT	1.23291	0.81109	0.213965	GT	0.782315	1.27826	0.270143	LT	0.759273	1.31705	0.390533	LT	0.970545	1.03035	0.987555	LT	512	514	516	-3318	-3301	-3283	-559	-556	-553
103047_at	P	P	P	P	1090.8	920.132	1261.47	735.867	475.334	996.4	916.3	866.541	966.059	1142.47	985.42	1299.51	1.48233	0.674612	0.0527247	GT	1.19044	0.840026	0.237609	GT	0.954776	1.04737	0.668114	LT	0.803085	1.2452	0.271133	LT	0.644103	1.55255	0.0884908	LT	0.802037	1.24683	0.0456379	LT	2325	2330	2335	2023	2030	2036	1057	1061	1064
103052_r_at	P	P	P	P	748.05	520.072	976.028	636.933	303.234	970.632	667.533	613.341	721.726	807	662.388	951.612	1.17446	0.851458	0.565614	GT	1.12062	0.892365	0.82073	GT	0.926952	1.0788	0.608101	LT	0.95416	1.04804	0.692252	LT	0.789261	1.26701	0.374071	LT	0.827179	1.20893	0.151706	LT	588	590	592	-3263	-3248	-3234	-539	-537	-535
103054_at	P	A	P	P	4415.13	2617.39	6212.88	844.533	270.951	1418.12	2347.03	1630.17	3063.89	2852.7	1600.08	4105.32	5.2279	0.191282	0.00429357	GT	1.88115	0.531588	0.134753	GT	1.5477	0.646119	0.301271	GT	0.35983	2.77909	0.0630655	LT	0.296047	3.37784	0.047885	LT	0.822741	1.21545	0.563985	LT	941	946	951	-437	-434	-430	1132	1140	1149
103056_at	P	P	P	P	2030.18	1541.37	2518.99	3142.53	2128.96	4156.1	3064.33	2932.78	3195.88	2778.8	2345.9	3211.7	0.646034	1.54791	0.0773735	LT	0.66252	1.50939	0.0470606	LT	0.730597	1.36874	0.117075	LT	1.02552	0.975116	0.990358	GT	1.1309	0.884255	0.614776	GT	1.10275	0.90682	0.282059	GT	417	418	419	695	697	700	1270	1275	1280
103057_at	P	P	P	P	2747.68	1697.4	3797.97	2368.73	967.738	3769.73	2300.3	2023.17	2577.43	2977.07	2439.8	3514.33	1.15998	0.862084	0.688813	GT	1.19449	0.837178	0.759307	GT	0.92295	1.08348	0.58458	LT	1.02975	0.97111	0.870754	GT	0.79566	1.25682	0.358142	LT	0.772673	1.29421	0.0786593	LT	-314	-313	-312	-523	-520	-517	-1443	-1435	-1427
103061_at	P	P	P	P	119.4	86.2653	152.535	217.967	90.1719	345.761	283.6	168.67	398.53	108.1	86.1376	130.062	0.54779	1.82552	0.149437	LT	0.421016	2.37521	0.0121566	LT	1.10453	0.90536	0.826883	GT	0.768571	1.30112	0.463443	LT	2.01634	0.495947	0.198624	GT	2.6235	0.381171	0.0142556	GT	397	399	401	3392	3414	3436	-380	-377	-375
103062_at	P	P	P	P	502.783	390.018	615.548	569.867	428.972	710.761	498.567	476.23	520.903	635.533	557.579	713.488	0.882282	1.13342	0.470153	LT	1.00846	0.991613	0.889621	GT	0.79112	1.26403	0.178389	LT	1.14301	0.874883	0.384624	GT	0.896675	1.11523	0.427628	LT	0.784485	1.27472	0.0242507	LT	1183	1186	1188	542	544	546	-534	-532	-531
103063_at	P	P	P	P	403.767	197.082	610.452	928.033	120.082	1735.98	495.1	322.529	667.671	684.833	288.026	1081.64	0.435078	2.29844	0.380542	LT	0.815525	1.2262	0.495389	LT	0.589584	1.69611	0.374976	LT	1.87444	0.533494	0.695254	GT	1.35512	0.73794	0.947017	GT	0.72295	1.38322	0.571401	LT	152	154	156	162	165	168	848	863	878
103064_at	P	P	P	P	1791.68	869.618	2713.75	1352.23	733.699	1970.77	1417.7	1092.81	1742.59	2076.4	1778.35	2374.45	1.32498	0.754728	0.645191	GT	1.2638	0.791267	0.80341	GT	0.86288	1.15891	0.44133	LT	0.953822	1.04841	0.75589	LT	0.651239	1.53553	0.148209	LT	0.682768	1.46463	0.0539155	LT	304	305	307	336	338	340	-516	-513	-509
103065_at	P	P	P	P	1556.77	1444.55	1668.98	2146.3	1784.57	2508.03	3553.9	2402.92	4704.88	2453.33	1941.4	2965.26	0.725326	1.37869	0.00513718	LT	0.438045	2.28287	0.000218638	LT	0.634552	1.57592	0.00175079	LT	0.603928	1.65583	0.0527649	LT	0.874851	1.14305	0.414369	LT	1.4486	0.690321	0.135347	GT	371	372	373	3069	3078	3087	-1704	-1699	-1694
103067_at	P	P	P	P	1634.15	1373.4	1894.9	1182.43	976.384	1388.48	1884.47	1727.33	2041.6	1323.9	968.334	1679.47	1.38202	0.723577	0.0595662	GT	0.867168	1.15318	0.262453	LT	1.23435	0.810146	0.212864	GT	0.627463	1.59372	0.00796118	LT	0.893144	1.11964	0.545172	LT	1.42342	0.702533	0.0540953	GT	-1604	-1600	-1596	521	523	525	612	614	616
103068_at	P	A	P	P	422.017	297.008	547.026	320.267	201.988	438.546	477.5	437.939	517.061	375.967	305.299	446.634	1.3177	0.758896	0.356691	GT	0.883805	1.13147	0.452079	LT	1.12248	0.890881	0.781671	GT	0.670716	1.49095	0.114462	LT	0.851849	1.17392	0.454533	LT	1.27006	0.787365	0.0746202	GT	-3916	-3903	-3891	-12912	-12854	-12797	377	379	380
103069_at	P	P	P	P	999.733	872.515	1126.95	1189.57	681.525	1697.61	1228.37	1006.97	1449.76	2008.87	1650.38	2367.36	0.840418	1.18988	0.4508	LT	0.813872	1.22869	0.122397	LT	0.49766	2.0094	0.000565155	LT	0.968413	1.03262	0.780072	LT	0.592158	1.68874	0.0734797	LT	0.611472	1.6354	0.01951	LT	178	178	179	448	450	452	-1339	-1334	-1329
103071_at	P	P	P	P	1395.73	841.96	1949.51	875.3	425.225	1325.37	1236.7	1082.87	1390.53	1611.2	1198.5	2023.9	1.59458	0.627126	0.30095	GT	1.12859	0.886058	0.984504	GT	0.866269	1.15438	0.50094	LT	0.707771	1.41289	0.25501	LT	0.54326	1.84074	0.120122	LT	0.767565	1.30282	0.166386	LT	364	366	368	18651	18775	18899	1137	1145	1153
103073_i_at	P	P	P	P	5945.92	4664.61	7227.22	6540.9	5648.91	7432.89	6012.47	5400.44	6624.5	5482.37	5381.36	5583.37	0.909036	1.10007	0.491405	LT	0.988931	1.01119	0.821783	LT	1.08455	0.922039	0.753212	GT	1.08789	0.919211	0.411065	GT	1.19308	0.838167	0.0774307	GT	1.09669	0.911833	0.170941	GT	-832	-830	-829	-800	-797	-795	-632	-630	-628
103074_f_at	P	P	P	P	2855.1	1845.28	3864.92	3301.7	1796.23	4807.17	2661.23	1614.77	3707.7	2547.27	2199.98	2894.56	0.864736	1.15642	0.63229	LT	1.07285	0.932098	0.925884	GT	1.12085	0.892181	0.886852	GT	1.24067	0.806019	0.602032	GT	1.29617	0.771502	0.518058	GT	1.04474	0.957175	0.957908	GT	2773	2783	2794	-15120	-15040	-14960	-1495	-1487	-1479
103076_at	P	P	P	P	986.05	736.993	1235.11	937.667	496.652	1378.68	1095.57	907.53	1283.6	1096.8	831.525	1362.07	1.0516	0.950932	0.830492	GT	0.900037	1.11107	0.532886	LT	0.899024	1.11232	0.56106	LT	0.855874	1.1684	0.471071	LT	0.854911	1.16971	0.503679	LT	0.998876	1.00113	0.968389	LT	8924	8958	8992	763	767	771	-1335	-1328	-1321
103078_at	P	P	P	P	671.917	420.033	923.8	748.767	503.679	993.854	582.267	501.443	663.09	545.533	407.09	683.977	0.897365	1.11437	0.599605	LT	1.15397	0.866576	0.818164	GT	1.23167	0.811906	0.626352	GT	1.28595	0.777634	0.318581	GT	1.37254	0.728576	0.259411	GT	1.06733	0.936913	0.643221	GT	-610	-608	-606	-734	-731	-727	-1992	-1983	-1973
103079_at	P	P	P	P	1027.12	662.886	1391.35	504.3	322.279	686.321	824.667	671.551	977.782	1233.07	1036.72	1429.41	2.03672	0.490986	0.0720749	GT	1.24549	0.802895	0.647286	GT	0.832977	1.20051	0.389616	LT	0.61152	1.63527	0.0710239	LT	0.40898	2.44511	0.0115043	LT	0.668793	1.49523	0.0299512	LT	253	254	255	2522	2536	2549	999	1004	1010
103080_at	P	P	P	P	826	713.637	938.363	2230.4	1574.04	2886.76	1219	1195	1243	2016.3	1879.58	2153.02	0.370337	2.70024	0.000205422	LT	0.677605	1.47579	0.0053069	LT	0.409661	2.44104	5.06523e-05	LT	1.8297	0.546539	0.0173575	GT	1.10618	0.904008	0.62788	GT	0.604573	1.65406	0.00015907	LT	489	490	492	980	984	989	-4640	-4619	-4598
103081_at	P	P	P	P	4217.68	3171.07	5264.29	2236.43	1950.06	2522.8	2357.6	1819.08	2896.12	3658.6	3026.09	4291.11	1.8859	0.530252	0.01598	GT	1.78897	0.55898	0.0267477	GT	1.15281	0.867443	0.5863	GT	0.948606	1.05418	0.751603	LT	0.611281	1.63591	0.0108671	LT	0.644399	1.55183	0.0342403	LT	155	156	156	4935	4953	4970	519	520	522
103082_at	P	P	P	P	510.717	363.551	657.882	554.233	514.276	594.191	905.667	805.139	1006.19	756.633	633.515	879.752	0.921483	1.08521	0.563104	LT	0.563912	1.77333	0.0294558	LT	0.674986	1.48151	0.100113	LT	0.611962	1.63409	0.00182129	LT	0.732499	1.36519	0.0321614	LT	1.19697	0.835444	0.148882	GT	192	193	194	-429	-427	-425	426	428	430
103083_at	P	A	P	A	195.25	128.51	261.99	244.433	118.484	370.383	176.067	126.296	225.837	192.7	79.2384	306.162	0.798786	1.2519	0.512724	LT	1.10895	0.90175	0.878283	GT	1.01323	0.98694	0.880846	GT	1.3883	0.720305	0.450875	GT	1.26847	0.788354	0.582677	GT	0.913683	1.09447	0.979697	LT	-7145	-7108	-7071	600	605	609	109	109	110
103085_at	P	P	P	P	983.8	764.841	1202.76	1023.63	853.025	1194.24	1090.37	865.172	1315.56	605.1	504.436	705.764	0.961086	1.04049	0.71713	LT	0.902265	1.10832	0.493613	LT	1.62585	0.615064	0.0256708	GT	0.938797	1.06519	0.672047	LT	1.69168	0.59113	0.0108649	GT	1.80196	0.554951	0.0107829	GT	-378	-377	-376	626	628	631	-1929	-1922	-1915
103086_at	P	P	P	P	335.65	262.726	408.574	261.9	123.163	400.637	222.3	184.838	259.762	349.867	230.639	469.094	1.2816	0.780277	0.258801	GT	1.5099	0.662297	0.0444212	GT	0.959365	1.04236	0.82984	LT	1.17814	0.848797	0.797391	GT	0.748571	1.33588	0.370762	LT	0.635385	1.57385	0.0790991	LT	116	116	117	292	294	295	763	766	769
103092_at	P	P	P	P	1686.8	1239.46	2134.14	590.567	558.338	622.795	1480.5	1250.72	1710.28	1197.33	1070.75	1323.91	2.85624	0.350111	0.00152163	GT	1.13934	0.877697	0.671953	GT	1.4088	0.709825	0.181818	GT	0.398897	2.50691	0.000424391	LT	0.493235	2.02743	0.00034515	LT	1.2365	0.808736	0.0985188	GT	2262	2270	2277	1202	1207	1213	3546	3562	3578
103094_at	P	P	P	P	2023.58	1622.01	2425.16	1423.43	1139.41	1707.46	1778.9	1138.16	2419.64	1616.97	1045.21	2188.73	1.42162	0.703422	0.0924349	GT	1.13755	0.879084	0.520246	GT	1.25147	0.799061	0.283762	GT	0.800176	1.24972	0.386764	LT	0.880311	1.13596	0.63001	LT	1.10015	0.90897	0.72856	GT	5419	5435	5452	2784	2796	2808	-601	-599	-596
103097_at	P	P	P	P	625.017	490.842	759.191	711.4	408.574	1014.23	683.067	641.075	725.058	846.533	742.678	950.388	0.878573	1.13821	0.611794	LT	0.915016	1.09288	0.533613	LT	0.738325	1.35442	0.126921	LT	1.04148	0.960172	0.99302	GT	0.840369	1.18995	0.372346	LT	0.806899	1.23931	0.0369223	LT	-666	-665	-663	-3930	-3917	-3903	1378	1383	1388
103098_at	P	P	P	P	1966.73	1521.11	2412.36	1478.13	941.349	2014.92	1302.63	987.469	1617.8	1768.83	1254.41	2283.26	1.33055	0.751568	0.243827	GT	1.50981	0.662333	0.0904365	GT	1.11188	0.899376	0.668669	GT	1.13473	0.881269	0.70159	GT	0.835654	1.19667	0.490909	LT	0.736436	1.35789	0.206842	LT	895	898	900	-416	-415	-413	-435	-433	-431
103099_f_at	P	P	P	P	4817.9	4111.36	5524.44	5397.37	4177.68	6617.06	4165.67	3641.08	4690.25	5336.03	4922.02	5750.05	0.892639	1.12027	0.42908	LT	1.15657	0.864623	0.279367	GT	0.902899	1.10754	0.335974	LT	1.29568	0.771796	0.149322	GT	1.01149	0.988636	0.991165	GT	0.780667	1.28096	0.0313414	LT	1100	1102	1103	-1669	-1665	-1661	-4357	-4347	-4337
103100_at	P	P	P	P	1098.68	781.62	1415.75	630.467	248.129	1012.8	1087.27	895.535	1279	1000.07	819.202	1180.93	1.74265	0.573838	0.192517	GT	1.0105	0.989609	0.82587	GT	1.09861	0.910241	0.981579	GT	0.579864	1.72454	0.125307	LT	0.630425	1.58623	0.169673	LT	1.08719	0.919799	0.557322	GT	-872	-867	-862	250	252	254	-2634	-2613	-2592
103101_at	P	A	A	A	1116.93	867.182	1366.68	352.467	161.785	543.148	616.167	347.383	884.95	841.933	736.754	947.113	3.1689	0.315566	0.00270293	GT	1.81271	0.551659	0.0299967	GT	1.32663	0.75379	0.179001	GT	0.572031	1.74816	0.210273	LT	0.41864	2.38869	0.0433662	LT	0.731847	1.36641	0.216137	LT	-432	-430	-429	-172	-171	-171	660	663	667
103201_at	P	P	P	P	1471.43	812.884	2129.98	680.767	381.364	980.169	896.767	661.296	1132.24	1223.3	878.885	1567.71	2.16144	0.462655	0.106291	GT	1.64082	0.609451	0.309195	GT	1.20284	0.831366	0.832529	GT	0.759135	1.31729	0.348624	LT	0.5565	1.79694	0.110364	LT	0.733072	1.36412	0.220958	LT	238	240	241	523	526	530	-480	-476	-473
103202_at	A	P	P	P	147.067	19.5055	274.628	10035.1	6881.39	13188.7	3027.7	2280.04	3775.36	12899.4	11327.9	14470.9	0.0146553	68.2348	6.05431e-05	LT	0.0485737	20.5873	0.000370554	LT	0.011401	87.7112	3.59214e-05	LT	3.31442	0.301712	0.00536679	GT	0.777948	1.28543	0.21755	LT	0.234716	4.26046	0.000437386	LT	440	445	450	385	391	397	-585	-576	-566
103203_f_at	P	P	P	P	3337.77	2058.68	4616.86	1381.87	959.619	1804.11	1768.87	1349.95	2187.78	2156.23	1840.14	2472.33	2.4154	0.414009	0.0404282	GT	1.88695	0.529955	0.125522	GT	1.54796	0.646011	0.30667	GT	0.781216	1.28006	0.260861	LT	0.640871	1.56038	0.0529957	LT	0.82035	1.21899	0.22673	LT	128	129	129	292	293	295	216	218	219
103204_r_at	P	P	P	P	2566.05	1952.88	3179.22	932.5	831.711	1033.29	1649.9	1418.46	1881.34	2298.7	2104.99	2492.41	2.7518	0.363399	0.00399288	GT	1.55528	0.642973	0.130799	GT	1.1163	0.895813	0.796991	GT	0.565186	1.76933	0.00348704	LT	0.405664	2.46509	0.000208569	LT	0.717754	1.39324	0.0176844	LT	214	215	215	7030	7061	7092	447	449	451
103205_at	P	P	P	P	1842.9	1371.72	2314.08	3665.93	3251.88	4079.99	2722.6	1540.9	3904.3	3173.83	2582.85	3764.82	0.50271	1.98922	0.00923992	LT	0.67689	1.47735	0.199595	LT	0.580654	1.7222	0.0288471	LT	1.34648	0.742676	0.255354	GT	1.15505	0.865764	0.261604	GT	0.857827	1.16574	0.502839	LT	-639	-637	-635	-826	-822	-819	-275	-274	-273
103207_at	P	P	P	P	1616.15	653.77	2578.53	1178.8	469.969	1887.63	1700.13	683.8	2716.47	2093.93	1213.17	2974.7	1.37101	0.729388	0.828203	GT	0.950602	1.05197	0.722911	LT	0.771825	1.29563	0.409067	LT	0.693357	1.44226	0.54533	LT	0.56296	1.77633	0.233436	LT	0.811933	1.23163	0.577279	LT	-815	-808	-801	176	178	180	-202	-199	-197
103209_at	P	P	P	P	298.75	252.315	345.185	543.067	377.446	708.688	335.333	263.632	407.034	535.133	374.441	695.826	0.550117	1.8178	0.00885775	LT	0.890905	1.12245	0.430074	LT	0.558272	1.79124	0.0105796	LT	1.61948	0.617481	0.0714274	GT	1.01482	0.985392	0.949571	GT	0.626635	1.59583	0.081737	LT	2006	2011	2016	-601	-598	-596	-480	-478	-476
103210_at	A	A	P	A	112.583	57.3505	167.816	62.9667	2.03206	123.901	160.833	148.176	173.491	153.733	80.2191	227.248	1.78798	0.559289	0.209171	GT	0.7	1.42857	0.204318	LT	0.732329	1.36551	0.342588	LT	0.391503	2.55426	0.120169	LT	0.409584	2.4415	0.165626	LT	1.04618	0.955855	0.699366	GT	-373	-371	-368	-114	-113	-112	-1575	-1561	-1547
103211_at	P	A	P	A	1095.85	760.22	1431.48	826.6	368.098	1285.1	1553.63	1499.72	1607.55	1403.6	1006.17	1801.03	1.32573	0.7543	0.340917	GT	0.705347	1.41774	0.117621	LT	0.780742	1.28083	0.293975	LT	0.532043	1.87955	0.0594925	LT	0.588914	1.69804	0.136323	LT	1.10689	0.903431	0.47501	GT	-1497	-1492	-1486	-475	-473	-470	-1099	-1093	-1088
103212_at	P	P	P	P	3141.42	2228.25	4054.58	1814.23	885.721	2742.75	3393.2	2998.68	3787.72	4091.03	3754.46	4427.61	1.73154	0.577521	0.121206	GT	0.925798	1.08015	0.603268	LT	0.767879	1.30229	0.246978	LT	0.534667	1.87032	0.0514468	LT	0.443466	2.25497	0.0235638	LT	0.829424	1.20566	0.0641386	LT	-549	-546	-544	-1474	-1466	-1458	824	828	833
103216_f_at	P	P	P	P	634.483	588.17	680.796	439.333	300.33	578.337	523.9	403.079	644.721	625.633	533.977	717.29	1.4442	0.692427	0.0119253	GT	1.21108	0.825711	0.079826	GT	1.01415	0.986052	0.832796	GT	0.838582	1.19249	0.405888	LT	0.702222	1.42405	0.0950098	LT	0.837391	1.19418	0.26818	LT	365	366	367	283	284	285	3106	3115	3124
103217_at	P	P	P	P	190.167	160.94	219.393	203.067	161.102	245.031	300.267	214.585	385.949	329	233.835	424.165	0.936474	1.06784	0.62652	LT	0.633326	1.57897	0.0208677	LT	0.578014	1.73006	0.00777596	LT	0.676288	1.47866	0.110031	LT	0.617224	1.62016	0.0559286	LT	0.912665	1.09569	0.672634	LT	-845	-842	-840	-377	-375	-374	-2384	-2374	-2364
103218_at	P	P	P	P	1616.6	1324.6	1908.6	1418.37	1212.32	1624.41	1843.97	1271.93	2416	1592.4	1319.93	1864.87	1.13976	0.877376	0.387767	GT	0.876697	1.14064	0.489865	LT	1.0152	0.98503	0.974449	GT	0.769193	1.30006	0.27821	LT	0.89071	1.1227	0.365548	LT	1.15798	0.863573	0.556111	GT	4856	4868	4880	-4165	-4151	-4136	1622	1627	1633
103220_at	P	P	P	P	884.717	663.41	1106.02	1982.1	1470.76	2493.44	1646.07	1159.74	2132.4	1436.53	1220.18	1652.89	0.446353	2.24038	0.0167943	LT	0.537473	1.86056	0.0506048	LT	0.615869	1.62372	0.0795497	LT	1.20414	0.830466	0.407137	GT	1.37978	0.724753	0.115153	GT	1.14586	0.872707	0.550435	GT	371	372	374	-1297	-1291	-1286	8589	8627	8665
103221_at	P	P	P	P	825.05	572.567	1077.53	739.267	536.727	941.806	873.567	536.098	1211.04	645.433	504.803	786.064	1.11604	0.896027	0.766869	GT	0.944461	1.0588	0.772356	LT	1.27829	0.782296	0.404913	GT	0.846262	1.18167	0.567852	LT	1.14538	0.873072	0.494039	GT	1.35346	0.738848	0.284208	GT	613	615	618	-530	-527	-524	632	635	638
103222_at	P	P	P	P	1731.28	1218.5	2244.07	2494.8	993.556	3996.04	2588.23	1864.06	3312.41	1422.97	1320.83	1525.1	0.693957	1.44101	0.457495	LT	0.668905	1.49498	0.165462	LT	1.21667	0.821914	0.686974	GT	0.963901	1.03745	0.735955	LT	1.75324	0.570373	0.356639	GT	1.8189	0.549783	0.0162961	GT	608	611	614	589	593	597	2033	2046	2059
103223_at	P	P	P	P	400.05	245.297	554.803	385	231.277	538.723	549.267	456.677	641.856	722	543.75	900.25	1.03909	0.96238	0.894348	GT	0.728335	1.373	0.292212	LT	0.554086	1.80477	0.118715	LT	0.700935	1.42667	0.178919	LT	0.533241	1.87532	0.0663913	LT	0.760757	1.31448	0.1791	LT	230	231	232	373	375	377	971	977	983
103225_at	P	P	P	P	1042.2	858.566	1225.83	484.7	151.649	817.751	619.633	420.57	818.697	501.3	378.978	623.622	2.1502	0.465074	0.0113175	GT	1.68196	0.594544	0.015658	GT	2.07899	0.481002	0.00195234	GT	0.782237	1.27839	0.424051	LT	0.966886	1.03425	0.729237	LT	1.23605	0.809027	0.400973	GT	2179	2187	2196	-22918	-22793	-22669	-882	-878	-873
103229_at	P	A	P	P	464.35	376.181	552.519	238.533	139.137	337.93	403.367	385.307	421.426	472.467	387.781	557.153	1.94669	0.513693	0.0106141	GT	1.15119	0.868669	0.447087	GT	0.982821	1.01748	0.837801	LT	0.591356	1.69103	0.0526987	LT	0.504868	1.98072	0.0335205	LT	0.853746	1.17131	0.180669	LT	924	926	929	-602	-599	-597	-395	-393	-391
103232_at	P	P	P	P	1534.77	1061.52	2008.01	3498.9	2053.42	4944.38	1945.5	1374.02	2516.98	1868.33	1712.84	2023.83	0.438643	2.27976	0.0158103	LT	0.78888	1.26762	0.289161	LT	0.821463	1.21734	0.268455	LT	1.79846	0.556032	0.132051	GT	1.87274	0.533977	0.0825161	GT	1.0413	0.960336	0.925352	GT	707	709	712	-3379	-3362	-3345	513	515	518
[truncated: 5,525 more rows]
[truncated: 23 more columns]
